# Supplementary material for: Cancer Cells Retrace a Stepwise Differentiation Program during Malignant Progression
Source: Oxford University Press journal article supplement (doi:10.1158/2159-8290.cd-20-1637), 2021-04-28
Supplement: 21598290cd201637-sup-255232_2_supp_7037701_qr6tcw.xlsx [file 21598290cd201637-sup-255232_2_supp_7037701_qr6tcw.xlsx]

## Sheet: Table legend
Supplementary Table 1
Tab1	Bulk sample information
Tab2	MLP mRNA signature
Tab3	MLP miRNA signature
Tab4	PanNET mRNA signature

## Sheet: Bulk Sample Info
samples	snf_mRNA-miRNA-Protein	snf_mRNA-miRNA	mRNA	lnRNA	miRNA	Proteins	Final-clusters
Pancreas_Islets_AJ_1	NA	NA	1	3	2	NA	Normal-Islet
Pancreas_Islets_AJ_2	NA	NA	1	3	NA	NA	Normal-Islet
Pancreas_Islets_Bl6/N_3	NA	NA	1	3	2	NA	Normal-Islet
Pancreas_Islets_Bl6/N_4	NA	NA	1	3	NA	NA	Normal-Islet
Pancreas_IT_AJ_3	NA	1	2	4	2	NA	IT
Pancreas_IT_AJ_4	NA	NA	2	4	NA	NA	IT
Pancreas_IT_Bl6/N_8	NA	1	2	5	2	NA	IT
Pancreas_IT_Bl6/N_9	NA	1	2	5	2	NA	IT
Pancreas_IT_Bl6/N_10	NA	NA	2	5	NA	NA	IT
Pancreas_IT_Bl6/N_11	1	1	2	5	2	2	IT
Pancreas_IT_Bl6/N_14	NA	1	2	4	2	NA	IT
Pancreas_IT_Bl6/N_12	NA	1	2	4	2	NA	IT
Pancreas_IT_Bl6/N_13	NA	1	2	4	2	NA	IT
Pancreas_IT_Bl6/N_7	NA	1	2	5	2	NA	IT
Pancreas_IT_AJ_1	1	1	2	4	2	2	IT
Pancreas_IT_AJ_2	NA	1	5	4	2	NA	IT
Pancreas_IT_Bl6/N_17	NA	NA	NA	NA	2	NA	IT
Pancreas_IT_Bl6/N_18	NA	NA	NA	NA	2	NA	IT
Pancreas_IT_AJ_5	NA	NA	NA	NA	NA	2	IT
Pancreas_IT_AJ_6	NA	NA	NA	NA	NA	2	IT
Pancreas_IT_Bl6/N_16	NA	NA	NA	NA	NA	2	IT
Pancreas_F-MLP_Bl6/J_1	NA	2	2	5	2	NA	MLP
Pancreas_NF-MLP_Bl6/N_11	NA	2	4	5	1	NA	MLP
Pancreas_F-MLP_Bl6/N_2	NA	NA	4	5	NA	NA	MLP
Pancreas_NF-MLP_Bl6/J_10	NA	2	4	2	1	NA	MLP
Pancreas_NF-MLP_Bl6/J_9	3	2	4	2	1	1	MLP
Pancreas_NF-MLP_AJ_1	3	2	4	2	1	1	MLP
Pancreas_NF-MLP_AJ_4	3	2	4	2	1	1	MLP
Liver_metastasis_AJ_1	3	2	4	2	1	3	MLP
Pancreas_NF-MLP_Bl6/J_7	2	3	5	1	1	1	MLP
Pancreas_NF-MLP_AJ_3	NA	3	5	1	1	NA	MLP
Pancreas_NF-MLP_AJ_6	NA	3	5	1	1	NA	MLP
Pancreas_NF-MLP_AJ_2	2	3	5	1	1	1	MLP
Pancreas_NF-MLP_AJ_5	NA	3	5	1	1	NA	MLP
Liver_metastasis_AJ_2	2	3	5	1	1	3	MLP
Liver_metastasis_AJ_3	NA	3	5	1	1	NA	MLP
Liver_metastasis_AJ_4	2	3	5	1	1	1	MLP
Liver_metastasis_AJ_5	2	3	5	1	1	1	MLP
LN_metastasis_Bl6/N_6	NA	NA	NA	NA	NA	1	MLP
Pancreas_NF-MLP_Bl6/J_8	NA	NA	NA	NA	NA	1	MLP
Pancreas_NF-MLP_Bl6/N_13	NA	NA	NA	NA	NA	1	MLP
Liver_normal_AJ_1	NA	NA	3	6	3	NA	normal-Liver
Liver_normal_AJ_2	NA	NA	3	6	NA	NA	normal-Liver
Liver_normal_Bl6/J_3	NA	NA	3	6	3	NA	normal-Liver

## Sheet: MLP-mRNA-signatire
Gene	UP/DOWN(1:up,-1:down)
3300005D01Rik	1
Abcg2	1
Add2	1
Adgrb2	1
AF529169	1
AI504432	1
AI854703	1
Arx	1
Asgr1	1
Atp7b	1
Basp1	1
Cacng8	1
Caln1	1
Cdh17	1
Cdhr3	1
Chn2	1
Cited1	1
Cpb2	1
Crtac1	1
Cthrc1	1
Cyp2d26	1
Dchs1	1
Dclk3	1
Dpyd	1
Elovl7	1
Eml4	1
Ephx2	1
Fabp7	1
Fam163a	1
Fibcd1	1
Frat2	1
Frmpd4	1
Fst	1
Fxyd2	1
Gal	1
Gfra1	1
Gm13021	1
Gm26794	1
Gm26871	1
Gm45768	1
Gm9916	1
Gng2	1
Gpm6a	1
Greb1	1
Gria2	1
Habp2	1
Hc	1
Hectd2	1
Hrasls	1
Htr5a	1
Id1	1
Impa2	1
Jdp2	1
Kcna3	1
Kcnj3	1
Klb	1
Lrch2	1
Lrp1b	1
Lrrc4b	1
Lrrc9	1
Luzp2	1
Ly6h	1
Map2k6	1
Marcksl1	1
Msc	1
Myh3	1
Nat8l	1
Nell2	1
Neurod6	1
Nexmif	1
Nr1h4	1
Nrn1	1
Nrxn3	1
Oprl1	1
Pdk4	1
Peg10	1
Pgm5	1
Pla2g12b	1
Plk2	1
Pmaip1	1
Pou6f2	1
Ppp1r14c	1
Rasl10b	1
Rbp4	1
Rd3	1
Renbp	1
Rtn1	1
Scara3	1
Scn3a	1
Selenbp1	1
Serpina1c	1
Serpina1e	1
Sgip1	1
Shisa6	1
Slc16a1	1
Slc2a3	1
Slc6a1	1
Slc6a12	1
Soat2	1
Sox11	1
Sox6	1
Spp2	1
Sstr4	1
Syt10	1
Syt6	1
Tinag	1
Tmem132e	1
Tmem178	1
Tnfsf4	1
Tram1l1	1
Trf	1
Trim71	1
Ttc6	1
Unc5d	1
Zfp385b	1
Zfp536	1
Zfp711	1
Gm35409	1
Nsg2	1
Trank1	1
Ajap1	1
Nhlh1	1
Miat	1
Gm14204	1
Vgll2	1
Kcng4	1
2610316D01Rik	1
1700019D03Rik	-1
Aqp4	-1
Atp2a3	-1
C030029H02Rik	-1
Capsl	-1
Cc2d2b	-1
Ccl28	-1
Cdcp1	-1
Chrm3	-1
Cldn6	-1
Epcam	-1
Esrp1	-1
Fam187b	-1
Fut1	-1
Gcnt1	-1
Glp1r	-1
Glra3	-1
Glt28d2	-1
Gm13648	-1
Gm17767	-1
Gm26780	-1
Gm31518	-1
Gpr155	-1
Gpx2	-1
Iapp	-1
Igf2	-1
Igsf1	-1
Jakmip1	-1
Kdf1	-1
Krt27	-1
Krt7	-1
Meis2	-1
Npy	-1
Nqo1	-1
Pdzk1ip1	-1
Perp	-1
Pstpip2	-1
Slco1a6	-1
Spint1	-1
Stx3	-1
Sytl4	-1
Tmc4	-1
Tmem215	-1
Tmprss4	-1
Ttc22	-1
Ucn3	-1
Unc13b	-1
Vipr1	-1
Wfs1	-1
Car10	-1
Ins2	-1
Nrk	-1
Trpm5	-1
Ffar3	-1
Upb1	-1
G6pc2	-1
Nkx6-1	-1
Cdh7	-1
Cib3	-1
Ins1	-1
Sntg1	-1
D630039A03Rik	-1
Ankrd34c	-1
Gm6999	-1
A330008L17Rik	-1
4930480K15Rik	-1
4930557F10Rik	-1
4930524O08Rik	-1
Gm19744	-1
Gm13093	-1
Gm35172	-1
Gm20743	-1
Gm43016	-1
D7Ertd128e	-1
Gm31816	-1
Ociad2	-1

## Sheet: MLP-miRNA-signature
miRNA	UP/DOWN(1:up,-1:down)
mmu-miR-449a-5p	1
mmu-miR-137-3p	1
mmu-miR-181d-5p	1
mmu-miR-218-5p	1
mmu-miR-17-5p	1
mmu-miR-18a-5p	1
mmu-miR-181c-5p	1
mmu-miR-335-5p	1
mmu-miR-9-3p	1
mmu-miR-674-5p	1
mmu-miR-503-5p	1
mmu-miR-429-3p	-1
mmu-miR-141-3p	-1
mmu-miR-141-5p	-1
mmu-miR-200b-3p	-1
mmu-miR-200a-3p	-1
mmu-miR-200c-3p	-1
mmu-miR-200b-5p	-1
mmu-miR-200a-5p	-1
mmu-miR-31-5p	-1
mmu-miR-383-5p	-1
mmu-miR-183-5p	-1
mmu-miR-96-5p	-1
mmu-miR-182-5p	-1
mmu-miR-183-3p	-1
mmu-miR-199b-5p	1
mmu-miR-6540-5p	1
mmu-miR-130b-3p	1

## Sheet: PanNET-mRNA-signature
PanNET signature genes
Acp5
Gtf2h4
Pou2f2
Slc9a5
Cd48
Cep112
4930452B06Rik
Atad2
Cldn1
Gsdmd
Ccdc14
Clec4n
Fam111a
Msr1
Anapc11
Slc40a1
Astn1
Phf19
Depdc1a
Mutyh
Hpca
Asphd2
Rad18
Rexo5
Cenpi
Cenpu
Gins3
Cntnap4
Troap
Trim59
Kcnh4
Parpbp
Pmch
Pdzrn4
Neil3
Cchcr1
Nacad
BC055324
Palb2
4930503L19Rik
Zfp367
Pnma2
Pilra
Gpr68
Fancb
H2afx
Zgrf1
Ccdc18
Kcnt1
Cep128
C330021F23Rik
Gas2l3
Kbtbd6
Foxd2os
2210417A02Rik
Eldr
2810408I11Rik
Gm3667
Gm5141
Gm3468
Gm8281
Dleu2
