# Supplementary material for: Cancer Cells Retrace a Stepwise Differentiation Program during Malignant Progression
Source: Oxford University Press journal article supplement (doi:10.1158/2159-8290.cd-20-1637), 2021-04-28
Supplement: 21598290cd201637-sup-255232_2_supp_7037702_qr6tcw.xlsx [file 21598290cd201637-sup-255232_2_supp_7037702_qr6tcw.xlsx]

## Sheet: Table Legend
Supplementary Table 2
Tab1	Up-regulated genes after 7 days of miR-181cd DOX-inducible expression in ßTC3 cells
Tab2	List of genes presented in Supplementary Fig. S2D
Tab3	VIPER-inferred Transcription factor
Tab4	Bio-miRTa results
Tab5	Up-regulated genes after 7 days of Hmgb3 DOX-inducible expression in ßTC3 cells

## Sheet: Up-reg_genes_miR181-7Days
genes	log2FoldChange	pvalue	padj
Ica1l	2.11141	8.44693e-10	1.28934e-07
Tfcp2l1	1.81503	1.51845e-10	2.45849e-08
Gli2	1.47352	3.27058e-05	0.00263407
Cntn2	2.02941	3.34491e-09	4.60806e-07
Brinp2	2.18739	3.3907e-40	3.80364e-37
Cd34	3.6524	4.3033e-42	5.63195e-39
Entpd8	4.587	0.000101554	0.00738386
Prdm12	7.52261	3.45096e-14	8.08915e-12
Fibcd1	2.79317	3.29643e-15	7.96469e-13
Frzb	2.43222	1.56508e-08	1.98223e-06
Mybpc3	6.03271	0.000138195	0.00968909
4631405J19Rik	6.10732	6.07248e-05	0.00458501
Trp53i11	2.1823	6.08006e-53	1.59146e-49
Grem1	2.06795	1.17466e-06	0.000123812
Dll4	2.36155	6.9558e-05	0.00520194
Slc12a1	4.01092	2.77042e-08	3.45313e-06
Tmc2	6.31367	9.31705e-05	0.00683758
Id1	1.77816	1.42593e-09	2.03584e-07
Xkr7	1.39099	6.62269e-07	7.12392e-05
Plagl2	1.47563	1.56042e-12	3.26751e-10
Tgm2	1.55607	5.74978e-06	0.000540832
Pck1	5.87241	8.61617e-06	0.000773629
Xpnpep2	3.34272	1.89186e-12	3.90943e-10
Arhgap36	2.69058	1.52736e-198	7.99573e-195
Cldn2	5.35068	2.84066e-50	6.37322e-47
Slc2a2	1.79882	2.48769e-13	5.6622e-11
Cldn11	1.98358	4.73551e-06	0.000453483
Hist2h3c2	3.05323	6.8379e-08	8.38979e-06
Pdzk1	2.26022	8.18279e-11	1.39686e-08
Kcnc4	2.20628	1.51139e-09	2.13842e-07
Npnt	3.21199	7.05329e-30	3.81972e-27
Slc39a8	1.86574	8.3137e-29	4.35222e-26
Frem1	2.98807	1.60086e-05	0.00135454
Ppap2b	3.78556	1.22125e-17	3.5518e-15
Guca2a	3.10992	7.14397e-05	0.00531735
Marcksl1	1.69893	1.94573e-12	3.96853e-10
Nkain1	2.14693	5.65332e-06	0.000538093
Htr1d	2.1271	5.70418e-10	8.89841e-08
Gm13106	3.48596	0.000142613	0.0099544
Errfi1	1.28861	3.24905e-05	0.00263022
Trp73	2.04612	6.85629e-06	0.0006334
Rnf223	2.51756	5.74252e-09	7.57868e-07
Plb1	2.15524	1.52794e-06	0.000158916
Fgfr3	1.42253	0.000108785	0.007837
Rasl11b	2.17989	1.3153e-06	0.000137712
Mfsd7a	6.29616	5.56128e-05	0.00430246
Miat	4.54737	1.23707e-09	1.83285e-07
Hrk	2.35119	0.000119607	0.00853834
Hspb1	2.17921	3.91023e-05	0.00310152
Zcwpw1	2.25114	5.59143e-49	9.75705e-46
Lfng	2.53552	2.0923e-39	2.05373e-36
Fscn1	2.33707	5.32695e-05	0.00415593
Peg10	3.35312	1.04224e-39	1.09122e-36
Asb4	1.58238	4.56003e-09	6.12096e-07
Prokr1	2.43521	1.08476e-28	5.49553e-26
Plxna1	1.61747	6.1604e-23	2.30355e-20
Plxnd1	1.72678	1.16719e-08	1.51364e-06
Dusp16	1.3959	2.2974e-05	0.00188904
Abcc9	2.99895	1.60346e-06	0.00016459
P4ha3	2.31971	1.96833e-05	0.00163573
Cdhr5	4.16671	1.3632e-23	5.35227e-21
Sct	2.89832	1.67785e-17	4.79102e-15
Ascl2	4.41243	5.28705e-05	0.00415166
Cdkn1c	2.43976	1.87012e-28	9.17818e-26
Tnfrsf22	2.65033	1.74667e-33	1.37157e-30
Tnfrsf23	2.51449	1.73191e-47	2.71997e-44
Ggt5	4.23331	1.13018e-10	1.86837e-08
Tcp11l2	1.79936	1.13337e-06	0.000120268
Arhgef18	1.39929	5.35093e-11	9.44229e-09
Col4a2	3.52032	1.2901e-09	1.89355e-07
1810011O10Rik	1.69154	2.11853e-08	2.66172e-06
Unc5d	2.18028	7.15698e-09	9.3667e-07
Gdf15	3.29412	2.37658e-07	2.74442e-05
Mir181d	6.9586	0	0
Mir181c	6.65068	0	0
Crispld2	2.1044	1.18471e-11	2.18892e-09
Gm11100	6.27988	1.25537e-22	4.4808e-20
Sema3g	1.46688	1.1027e-05	0.000967479
Tdh	3.48529	7.60508e-06	0.000698467
Stmn4	2.77126	1.30324e-19	4.17703e-17
Apoc3	2.81697	5.99829e-05	0.00455088
Sema7a	3.52715	6.33531e-11	1.09336e-08
Sh3bgrl2	1.60397	3.93073e-07	4.34734e-05
Grm2	2.82823	3.19012e-15	7.82826e-13
Gpx1	1.55414	1.09821e-05	0.000967479
Nefh	1.25428	0.000113071	0.00810858
Npc1l1	2.31383	4.48121e-07	4.92149e-05
Upp1	1.59073	2.0996e-11	3.83421e-09
Gfpt2	3.70221	9.17911e-08	1.10891e-05
Olfr1372-ps1	2.62663	1.67538e-16	4.45965e-14
Gpx3	3.63128	2.13961e-28	1.01826e-25
Obscn	3.61435	2.36143e-06	0.000234723
Adora2b	3.52606	3.8825e-09	5.25644e-07
G6pc	9.25967	4.16142e-12	8.27279e-10
Tcam1	2.58534	0.00010492	0.00759338
Hist1h4j	2.38967	3.03837e-06	0.000298235
Hist1h4k	2.99971	4.47292e-06	0.000430964
Hist1h4i	1.68816	0.000125333	0.00890658
Hist1h3g	2.30541	1.17583e-08	1.51364e-06
Hist1h1d	2.06589	1.52111e-08	1.9422e-06
Hist1h2bg	3.08747	8.8573e-12	1.69639e-09
Hist1h2be	1.99548	4.9447e-10	7.8441e-08
Hist1h2bc	2.45003	1.24555e-24	5.58897e-22
Hist1h1c	1.94532	3.64838e-32	2.49121e-29
Id4	1.78093	1.57326e-16	4.26e-14
Fbp1	1.8274	4.52028e-08	5.58984e-06
Enc1	1.73269	1.35473e-24	5.75027e-22
Plk2	1.84107	2.60677e-15	6.71137e-13
Trib2	1.45119	1.96849e-05	0.00163573
Pik3cg	1.82245	6.45642e-05	0.00485159
Gpx2	2.60846	7.77322e-23	2.83903e-20
Tmem229b	1.3496	6.77942e-06	0.000630005
Prima1	3.5478	3.88382e-05	0.00309621
Dlk1	2.78914	2.56695e-22	8.95864e-20
Kcnk9	2.41661	4.82488e-13	1.05243e-10
Irak4	1.79528	2.91086e-07	3.31269e-05
Nckap5l	3.37483	2.20959e-12	4.44892e-10
Grasp	1.93051	0.000130735	0.00920714
Socs1	2.84199	4.44872e-06	0.000430964
Prodh	4.18472	1.57945e-23	6.05007e-21
Rtn4r	3.28778	5.34119e-24	2.20746e-21
Map6d1	2.00304	1.63719e-10	2.62367e-08
2010005H15Rik	2.86629	5.20997e-07	5.68213e-05
Gap43	1.56981	1.31472e-09	1.91182e-07
Dll1	2.53935	2.99933e-15	7.59748e-13
Umodl1	3.7535	1.09745e-10	1.83356e-08
Cyp4f14	3.70703	3.95541e-05	0.0031216
Zfp521	3.00285	1.10582e-09	1.65399e-07
Epb4.1l4a	4.54326	7.44092e-20	2.43458e-17
Cst6	2.57005	8.1914e-06	0.000743618
Ehbp1l1	1.40523	2.95273e-07	3.33616e-05
Ahnak	2.20679	5.34541e-05	0.00415593
Ms4a8a	4.65884	7.79943e-05	0.00577783
Cd274	2.10519	1.10098e-09	1.65399e-07
Hhex	5.30006	7.977e-06	0.000728365
Col17a1	4.59307	3.33951e-31	1.87311e-28
Ablim1	2.21958	1.24011e-07	1.46435e-05
Il1r1	-1.30995	3.77679e-07	4.2067e-05
Slc40a1	-1.51222	3.56561e-20	1.19144e-17
Pam	-1.23511	9.46386e-06	0.000844489
Dpp10	-1.4351	3.52145e-05	0.00282165
Lct	-1.44509	4.35681e-12	8.55296e-10
Colgalt2	-3.012	1.25065e-40	1.51088e-37
Tnr	-1.77044	1.8475e-17	5.18125e-15
Pfkfb3	-1.44742	6.43848e-07	6.97354e-05
Dpp7	-1.3768	9.48486e-13	2.04054e-10
Uap1l1	-1.81333	3.18696e-46	4.5501e-43
Pdk1	-1.75536	1.21511e-13	2.80637e-11
Ak3l2-ps	-4.25896	1.10803e-12	2.35157e-10
Sord	-1.67725	6.67766e-24	2.68904e-21
Pdyn	-1.92754	3.79154e-15	9.02214e-13
Nsdhl	-1.46534	1.37544e-09	1.98177e-07
Renbp	-1.78635	1.07424e-31	6.74841e-29
Chic1	-1.53008	1.1153e-17	3.30487e-15
Acsl4	-1.29809	1.52141e-05	0.00130567
Map3k15	-1.25585	1.8286e-06	0.000186482
Tmem27	-1.35067	2.14327e-06	0.000214395
Mgarp	-1.95497	3.01002e-06	0.000297311
Rragd	-1.93273	2.19516e-32	1.56705e-29
Aldoart1	-1.5867	5.65075e-05	0.00435025
Pgm2	-1.3043	1.50977e-05	0.0013028
Ak4	-4.14073	1.88612e-31	1.0971e-28
Pcsk9	-2.4676	1.35747e-49	2.66489e-46
Slc2a1	-1.5946	5.46804e-11	9.54172e-09
Ldha-ps2	-3.32975	2.25132e-15	5.89282e-13
Fhad1	-2.40061	1.41658e-20	4.8364e-18
Insig1	-1.48998	3.26342e-11	5.89103e-09
Prom1	-1.67161	9.79367e-11	1.65387e-08
Ppargc1a	-2.03696	6.1188e-12	1.18637e-09
Klb	-1.42479	1.57483e-06	0.000162716
Nap1l5	-1.48233	5.72263e-10	8.89841e-08
Anxa4	-1.55238	1.67306e-25	7.72805e-23
Bhlhe40	-2.42427	1.97026e-33	1.47347e-30
Eno2	-1.79802	3.47747e-18	1.05026e-15
Tpi1	-1.83843	3.81809e-11	6.81399e-09
Pik3c2g	-1.83978	2.03957e-07	2.37271e-05
Ttyh1	-1.38389	2.13385e-05	0.00176379
Cyp2s1	-1.7365	1.96075e-05	0.00163573
Gys1	-1.37911	9.80363e-06	0.000869864
Ldha	-3.39749	1.17718e-33	9.73032e-31
Aldoa	-1.5997	3.15413e-06	0.000307674
Bnip3	-2.90798	2.05104e-35	1.8948e-32
Muc2	-3.48135	2.65607e-07	3.04479e-05
1700040L02Rik	-2.97269	2.09535e-06	0.000210945
Kcnc2	-1.83865	6.31175e-06	0.000590036
Kbtbd11	-3.29932	3.2277e-05	0.00262648
Atp7b	-2.11791	8.19922e-08	9.98208e-06
Zdhhc2	-1.38528	8.98354e-07	9.59772e-05
Sc4mol	-1.24226	0.00012962	0.00916972
Lpl	-1.29909	0.000100495	0.00734078
Ogdhl	-1.21664	1.2019e-05	0.00104865
Stc1	-1.56636	8.62051e-06	0.000773629
Slitrk1	-1.68825	5.77668e-05	0.0044255
Gm16754	-2.99125	2.77831e-05	0.00227257
Ldlr	-1.23528	1.60424e-05	0.00135454
Glb1l2	-1.44301	3.45277e-09	4.71528e-07
Fxyd6	-1.34559	2.69936e-09	3.78512e-07
Ccdc33	-2.6134	2.19007e-18	6.74411e-16
Dusp18	-1.44918	3.17714e-15	7.82826e-13
P4ha2	-1.30054	7.92474e-05	0.0058431
Fam183b	-1.38928	1.11697e-07	1.32894e-05
Gabarap	-1.22639	1.33307e-05	0.00115668
Aldoc	-1.88201	6.49948e-19	2.04149e-16
Slc16a3	-2.70958	6.44489e-17	1.77574e-14
Pfkp	-1.89714	1.47146e-31	8.88818e-29
Gng4	-1.63414	8.11092e-35	7.07678e-32
Drd1a	-2.83535	5.75097e-06	0.000540832
Pgk1-rs7	-9.09141	5.42174e-09	7.21597e-07
Fos	-2.58606	1.32534e-24	5.75027e-22
Prlr	-1.72476	1.50588e-10	2.45849e-08
Ncald	-1.44059	3.18147e-09	4.42168e-07
Fer1l6	-1.41411	3.07249e-13	6.89335e-11
Naga	-1.26946	1.55653e-05	0.00132855
Nr4a1	-1.74245	1.1817e-11	2.18892e-09
Fam162a	-1.694	5.98543e-05	0.00455088
Rgs11	-1.53425	2.03289e-06	0.000205978
Sult1c2	-2.33507	3.29733e-07	3.6989e-05
Syt4	-1.383	9.61499e-08	1.1527e-05
Stard4	-1.42859	9.64065e-12	1.82417e-09
Egr1	-3.07096	4.58207e-96	1.43923e-92
Prelid2	-1.97192	3.25161e-13	7.19247e-11
Stk32a	-1.35582	1.8167e-07	2.1292e-05
Vldlr	-1.56482	8.45606e-10	1.28934e-07
Scd2	-1.42089	4.73736e-32	3.10001e-29
Scd1	-2.45437	7.63335e-180	2.99705e-176

## Sheet: Gene-list_FigS2D
Gene-list
Impa2
Jakmip1
Elovl7
Chn2
2610316D01Rik
Dclk3
Jdp2
Gng2
Spp2
Dpyd
Aqp4
Nsg2
Rasl10b
Pdzk1ip1
Serpina1e
Upb1
4930557F10Rik
Gcnt1
Cthrc1
Fut1
Atp7b
Rbp4
Slc2a3
A330008L17Rik
Car10
Nr1h4
Serpina1c
Map2k6
Krt7
Lrrc4b
Ttc22
Gal
Gpx2
Unc5d
Peg10
Fibcd1
Scn3a
Gfra1
Nrxn3
Lrch2
Fabp7
Capsl
Fxyd2
Rtn1
Pmaip1
Frat2
Tram1l1
3300005D01Rik
Cited1
Tmc4
1700019D03Rik
Selenbp1
Myh3
Gm13093
Gm6999
Crtac1
Nqo1
Cdh7
Tmem215
Unc13b
Ociad2
Gpr155
Stx3
Klb
Gria2
Igsf1
Trpm5
Wfs1
Eml4
Renbp
Sgip1
Frmpd4
Meis2
Nrk
Pstpip2
Slc16a1
Sntg1
Chrm3
Abcg2
Plk2
Ffar3
Vipr1
Marcksl1
Basp1
Perp
Id1
Add2
Trank1
Asgr1
Fam163a
Ppp1r14c
Epcam
Sox11
Soat2
Hectd2
Ephx2
Ajap1
Nat8l
Fam187b
Tmem178
Miat
Nhlh1
Zfp711
Cdh17
Trf
Slco1a6
Kcnj3
Gm26871
Ankrd34c
Glt28d2
Nrn1
D630039A03Rik
Cyp2d26
Slc6a12
Sox6
Syt6
Kcng4
Greb1
Lrrc9
Gpm6a
Gm13021
Cldn6
AI854703
Nell2
Ccl28
Trim71
Arx
Zfp536
Esrp1
Lrp1b
Hc
Spint1
Ins1
Iapp
G6pc2
Npy
Ins2
Igf2
Atp2a3
Sytl4
Nkx6-1
Glp1r

## Sheet: VIPER-analysis
gene	VIPER-infered TF				Positive TF selection
	size	nes	p.value	fdr	pval.postnatal	fc..postnatal	pval.2nd.Trans	fc.2nd.Trans	pval.grade	fc.grade	pval.met	fc.met	pval.PC2	rsq.PC2	cor.PC2	pval.mir181	fc.mir181	Number.significant
Hmgb3	1040	3.74059	0.000183589	0.00406443	0.000172707	4.05435	1.174e-06	1.72583	0.00108564	1.78121	0.973408	-0.0140587	2.75949e-27	0.576798	0.761279	0.000219265	-0.571751	4
Mycn	548	6.50595	7.72023e-11	8.28999e-07	0.0251833	1.06684	0.000169587	1.62246	0.063605	0.632637	0.00533722	1.48332	0.0114819	0.044572	0.225336	0.0433756	-0.813646	3
Zfp536	762	4.58014	4.64669e-06	0.000598902	0.00975053	4.23736	NA	NA	0.159543	0.626513	0.0300412	1.39697	1.30111e-07	0.184889	0.436098	0.895292	-0.020161	2
Zfp532	289	4.39534	1.10601e-05	0.00101507	0.000778359	1.07631	0.00495734	0.438616	0.22047	0.53135	0.185571	0.311561	NA	NA	NA	0.0081646	-0.480384	2
Sox11	312	4.17413	2.99128e-05	0.00159012	0.00105002	5.57779	3.98589e-06	3.15007	0.169311	0.473866	0.162446	0.929064	0.00486625	0.0559409	0.249141	0.133691	-0.761015	2
Sox6	227	4.13954	3.47999e-05	0.00166055	0.00135179	4.90804	0.0289566	0.49164	0.100687	-0.779908	0.0345805	-0.476139	NA	NA	NA	0.0559612	0.337803	2
Ebf4	370	3.9876	6.67444e-05	0.00225378	0.0104162	2.4808	NA	NA	0.408016	0.286374	0.398363	-0.257272	1.08857e-10	0.266571	0.520897	8.69558e-06	-1.18579	2
Csrnp2	547	3.68309	0.000230425	0.00466849	0.0023789	1.20607	NA	NA	0.0233281	0.381512	0.421352	0.0785986	NA	NA	NA	5.21936e-09	-0.831615	2
Arid5b	115	3.17224	0.00151267	0.0156814	0.0157198	1.20803	NA	NA	0.130565	-0.391469	0.484962	0.143555	NA	NA	NA	0.000131988	0.524004	2
Plscr1	32	2.86099	0.00422319	0.0319581	0.0101096	-0.704997	0.000852895	0.423432	0.0340645	-0.509211	0.210087	0.221198	NA	NA	NA	9.9836e-06	0.573732	2
Nr1h4	37	2.8448	0.00444398	0.0332346	0.0732513	-0.719691	0.109059	-0.325123	0.726442	0.104601	0.000449059	1.87504	0.502735	-0.00188018	0.0680113	1.12551e-06	1.24507	2
Elf2	575	5.7784	7.5415e-09	1.49935e-05	0.00651023	0.535095	NA	NA	0.775349	0.0537724	0.304514	0.0779271	NA	NA	NA	0.000983023	-0.187892	1
Zfp422	667	5.02518	5.02954e-07	0.000217678	0.0109604	-0.724814	2.32831e-05	1.5581	0.36859	0.22099	0.676102	0.0696451	NA	NA	NA	1.63949e-06	-0.383062	1
Ebf3	256	5.01619	5.27065e-07	0.000217678	0.101889	3.68702	0.00232296	0.364493	0.77185	0.0824408	0.198104	-0.503697	0.0569895	0.0241742	0.174673	1.53588e-05	-0.344477	1
Mxi1	247	4.2148	2.50002e-05	0.00151668	0.307762	0.81932	0.00820469	0.319507	0.0961162	0.485438	0.93791	0.0133739	NA	NA	NA	4.27013e-05	-0.335644	1
Smarca1	476	4.18109	2.90116e-05	0.00156817	0.0347529	1.32072	NA	NA	0.699821	0.104997	0.614802	-0.127039	NA	NA	NA	0.0606691	-0.307107	1
Zfp711	517	4.09642	4.19586e-05	0.00181521	0.000721276	5.78714	NA	NA	0.939988	0.0219214	0.0573461	0.522734	6.76234e-09	0.218852	0.473207	0.0147914	-0.354978	1
Zfp105	523	4.05696	4.97154e-05	0.00199196	0.131358	0.742094	0.000195597	0.794192	0.657081	-0.0664001	0.0263843	0.211973	NA	NA	NA	0.000371371	-0.44642	1
Zfp623	126	3.98576	6.72639e-05	0.0022642	0.00251905	-0.807485	NA	NA	0.666229	-0.0685153	0.00945728	0.299768	NA	NA	NA	0.0143133	-0.317125	1
Shox2	484	3.97113	7.15337e-05	0.00232766	0.244171	-0.579253	0.0133137	-0.38911	0.0249119	0.388757	0.940126	-0.052011	0.000121884	0.102618	0.32931	0.0633117	0.169756	1
Pbx1	383	3.75104	0.000176103	0.00393957	0.110985	0.402304	0.00022153	0.682585	0.027357	-0.552657	0.721805	0.0873707	NA	NA	NA	9.9541e-10	0.190081	1
Zbtb16	261	3.65319	0.000259006	0.00505673	0.0200887	5.80283	0.0911612	-0.330622	0.54404	-0.316816	0.402607	0.32146	0.11722	0.0149395	0.146069	0.00892861	-0.351567	1
Zfp286	584	3.65008	0.000262159	0.00507977	0.00520737	2.57414	NA	NA	0.0976362	0.291115	0.629805	0.0710657	NA	NA	NA	0.240154	-0.53757	1
Rfx7	334	3.62118	0.000293258	0.0054481	0.0202025	0.777192	NA	NA	0.55694	-0.116386	0.0440327	0.242021	NA	NA	NA	0.0010453	-0.371445	1
Lmx1a	299	3.42032	0.000625473	0.00858866	NA	NA	NA	NA	0.274078	0.205121	0.0443189	1.12416	NA	NA	NA	0.161496	-0.995922	1
Elf4	522	3.38326	0.000716315	0.00938024	0.00117453	2.07272	0.411629	0.0501048	0.989521	0.0041698	0.390711	0.195809	NA	NA	NA	0.00239284	0.143469	1
Ebf1	165	3.27697	0.00104928	0.0122071	0.0275744	4.83753	0.00175003	-0.468232	0.148108	-0.535152	0.158922	-0.393925	NA	NA	NA	0.257582	0.195075	1
Tub	348	3.26665	0.00108827	0.0125519	0.0279307	2.8927	0.0978808	-0.218988	0.403433	0.217514	0.612407	-0.132441	NA	NA	NA	2.83839e-05	-0.261815	1
Mycs	300	3.24271	0.00118401	0.0133257	NA	NA	NA	NA	0.063605	0.632637	0.00533722	1.48332	NA	NA	NA	0.0027487	0.152843	1
Zik1	807	3.17263	0.00151067	0.0156814	0.671752	0.746109	0.0463727	0.371546	0.968945	-0.00932362	0.97977	-0.00642407	NA	NA	NA	0.00041764	0.15295	1
Zfp112	48	3.04593	0.0023196	0.0208544	0.902041	-0.138984	NA	NA	0.721853	0.0620509	0.0150229	0.291157	NA	NA	NA	0.00363094	-0.744026	1
Zscan21	50	2.98303	0.00285412	0.024112	0.695241	-0.261531	2.42074e-05	1.03767	0.842535	0.0270111	0.140873	-0.181924	NA	NA	NA	0.0450072	-0.154502	1
Carhsp1	378	2.86065	0.00422767	0.0319695	0.0171289	1.14485	0.27165	-0.103571	0.458335	-0.209788	0.521651	0.0999338	NA	NA	NA	0.00550786	0.141189	1
Mecp2	173	2.85019	0.00436938	0.0328101	0.0176038	-0.342249	9.42592e-06	0.710578	0.445969	-0.144522	0.430664	-0.0821041	NA	NA	NA	3.95121e-05	0.0413918	1
Pknox2	200	2.78233	0.00539709	0.0388953	0.473925	0.34526	NA	NA	0.513105	0.0744984	0.198589	0.430223	0.192802	0.00878044	0.123357	0.000279397	0.7053	1
Trp63	65	5.07094	3.95846e-07	0.000196961	NA	NA	NA	NA	0.371739	0.467985	0.0218308	-0.8545	NA	NA	NA	NA	NA	0
Zfp354c	986	4.90454	9.36466e-07	0.000271889	0.0627824	0.249313	NA	NA	0.131908	-0.402877	0.0630424	0.56942	NA	NA	NA	3.65312e-05	-0.41394	0
Zbtb33	443	4.14508	3.39688e-05	0.00166055	0.108286	-0.417867	NA	NA	0.257515	0.32723	0.234035	0.133127	NA	NA	NA	0.000281053	-0.490457	0
Esrrg	277	4.09568	4.20923e-05	0.00181521	0.00422845	-1.69113	NA	NA	0.693305	0.177142	0.707376	-0.181058	0.00605952	0.053031	0.24327	4.20187e-05	0.204953	0
Zfp217	153	4.03463	5.46893e-05	0.00210485	0.0910332	0.559029	NA	NA	0.989342	-0.00353956	0.287549	0.22167	NA	NA	NA	0.00283866	-0.295601	0
Zfp867	147	4.00252	6.26721e-05	0.00222636	0.054338	0.829808	NA	NA	NA	NA	NA	NA	NA	NA	NA	0.51227	-0.0919053	0
Arnt2	328	3.72884	0.000192362	0.0041561	0.078431	0.548897	0.373077	-0.105905	0.104979	-0.66269	0.611329	-0.126819	NA	NA	NA	0.0801545	0.178495	0
AI854703	252	3.67198	0.000240677	0.00483063	0.396539	-2.28759	NA	NA	NA	NA	NA	NA	NA	NA	NA	0.550672	-1.06436	0
Zfp300	293	3.66314	0.000249144	0.00491785	0.035694	-2.03093	NA	NA	NA	NA	NA	NA	NA	NA	NA	0.246601	-0.243281	0
Csdc2	275	3.6363	0.000276585	0.00524175	0.319681	0.932448	NA	NA	0.214594	0.193778	0.0809748	0.796344	0.445688	-0.00065017	0.0764693	0.00480335	-0.9838	0
Zfp618	137	3.61733	0.000297661	0.00548247	0.0509639	1.02325	NA	NA	0.0634773	-0.504069	0.391521	0.183472	NA	NA	NA	0.000192841	-0.0659338	0
Sall2	255	3.60152	0.000316357	0.00575769	0.102688	-0.801657	NA	NA	0.399065	-0.22888	0.169651	-0.32696	NA	NA	NA	1.15294e-05	-0.0299202	0
Zfp410	164	3.53848	0.000402441	0.00660766	0.329117	0.373248	NA	NA	0.82421	-0.0252661	0.383163	-0.0660254	NA	NA	NA	0.00118878	-0.116461	0
Etv1	757	3.50683	0.000453481	0.00709837	0.657453	-0.181215	0.101028	0.371191	0.375819	-0.425691	0.436101	-0.278722	3.77415e-07	0.172576	0.42184	0.343489	0.174238	0
Zfp566	162	3.49293	0.000477747	0.007394	0.767855	0.611606	NA	NA	0.71943	-0.0450253	0.0483627	0.225255	NA	NA	NA	0.0921298	0.210261	0
Zfp984	138	3.48904	0.000484752	0.0074681	NA	NA	NA	NA	0.214888	-0.325258	0.0125242	-0.37585	NA	NA	NA	NA	NA	0
Zfp647	262	3.39666	0.000682137	0.00912178	0.17165	0.400667	NA	NA	0.567564	-0.0995666	0.251966	0.132493	NA	NA	NA	0.00922174	-0.416727	0
Zfp395	158	3.32845	0.000873322	0.0106766	0.0623397	0.665887	NA	NA	0.626772	0.170217	0.28799	0.231128	NA	NA	NA	0.20189	-0.0729107	0
Pou6f2	116	3.32287	0.000890978	0.010835	0.351292	1.57223	NA	NA	0.371631	-0.43132	0.482488	0.245547	0.0113994	0.0446673	0.225545	NA	NA	0
Zfp354a	286	3.31113	0.000929201	0.0111608	0.257133	-0.295168	0.0191225	0.0881952	0.957083	0.0149886	0.367161	0.125545	NA	NA	NA	0.181307	-0.0959727	0
Adnp2	92	3.18708	0.00143717	0.0152099	0.226537	-0.703078	NA	NA	0.0694134	0.371495	0.0422383	0.21938	NA	NA	NA	0.147714	0.02892	0
Thyn1	171	3.1833	0.00145606	0.0153738	0.551381	-0.403056	0.456631	-0.131811	0.980982	0.00602617	0.269565	-0.145272	NA	NA	NA	0.0394497	-0.151733	0
Nhlh2	240	3.16776	0.00153617	0.0158153	NA	NA	NA	NA	0.481031	0.147894	0.867489	-0.121319	NA	NA	NA	6.23708e-08	-1.23406	0
Jdp2	143	3.13567	0.0017146	0.0170237	0.382731	2.83285	NA	NA	0.944452	0.0212863	0.340818	-0.225163	NA	NA	NA	0.0404467	-0.0171028	0
Fev	506	3.12663	0.00176821	0.0173995	0.0596287	3.14551	NA	NA	0.12629	-1.05298	0.0744033	-1.41712	0.00131632	0.0728745	0.280882	0.0740815	-0.0998545	0
Klf12	77	3.00771	0.00263223	0.0227393	0.0477476	-1.06571	0.405834	-0.114281	0.212044	-0.218314	0.340067	0.150588	NA	NA	NA	0.000135035	-0.0869869	0
Zfp811	249	3.00377	0.00266653	0.0228517	0.165438	1.99117	NA	NA	NA	NA	NA	NA	NA	NA	NA	NA	NA	0
Arntl2	149	2.99591	0.00273631	0.023338	0.431409	-1.45966	NA	NA	0.210088	0.485993	0.291287	0.28237	NA	NA	NA	0.0225614	-0.462634	0
Nhlh1	147	2.86761	0.00413589	0.0314973	NA	NA	NA	NA	0.252084	0.107729	0.158771	0.394772	NA	NA	NA	0.000180656	-1.69455	0
Gata2	70	2.80251	0.00507066	0.0367649	0.0804934	3.3907	0.418008	-0.239596	0.400096	0.235006	0.247073	-0.338261	NA	NA	NA	0.000730422	-1.30561	0
Zfp706	240	2.7809	0.00542089	0.0390144	0.0172535	-0.398467	9.9374e-07	-0.540625	0.454097	-0.171578	0.357613	-0.108434	NA	NA	NA	0.000779713	-0.163555	0
Foxj2	726	-2.69313	0.0070785	0.0478488
Hsf4	188	-2.69669	0.00700315	0.0475347
Meis1	319	-2.70094	0.00691435	0.0470211
Zfp641	31	-2.71245	0.00667877	0.0458546
Mitf	233	-2.72912	0.00635042	0.0442798
Foxn3	263	-2.77391	0.00553865	0.0397023
Zfp446	37	-2.7748	0.00552349	0.0396466
Sox7	208	-2.79295	0.00522294	0.0377924
Mafg	490	-2.82608	0.00471214	0.0347157
Gm14403	234	-2.85203	0.00434403	0.0326426
Six4	429	-2.87519	0.00403784	0.0309507
Tcf7l2	301	-2.88717	0.0038872	0.0301813
Rel	115	-2.9111	0.00360159	0.0285205
Pdx1	285	-2.91487	0.00355838	0.0282826
Foxa3	235	-2.92871	0.00340372	0.0274969
Zbtb7b	510	-2.94032	0.00327871	0.0267325
Cpeb1	732	-3.00982	0.00261399	0.0226545
Vdr	256	-3.01619	0.00255976	0.0222926
Zbtb40	172	-3.01622	0.00255949	0.0222926
Gm20939	178	-3.02274	0.00250497	0.0219042
Ikzf2	352	-3.02404	0.00249421	0.0218682
Sall4	168	-3.08032	0.00206775	0.0191575
Zxdb	328	-3.08297	0.00204945	0.0190647
Zscan26	369	-3.10908	0.00187673	0.0180414
Aff1	674	-3.11451	0.00184252	0.0178726
Creb3l1	363	-3.13554	0.00171537	0.0170237
Bhlhe41	361	-3.1553	0.00160334	0.0162421
Hnf4g	195	-3.15588	0.00160015	0.0162252
Nfic	327	-3.17246	0.00151152	0.0156814
Zfp92	188	-3.20121	0.0013685	0.014651
Gm14322	241	-3.20151	0.00136709	0.014651
Nfxl1	333	-3.22754	0.00124859	0.0137019
Hivep3	663	-3.23604	0.00121202	0.0134928
Ikzf3	281	-3.27572	0.00105393	0.012248
Grhl1	32	-3.32549	0.000882637	0.0107518
Nr6a1	624	-3.33254	0.000860569	0.0105972
Hey2	157	-3.35499	0.00079367	0.0100388
Mafk	284	-3.38232	0.000718765	0.00939518
Nfe2l1	507	-3.38896	0.000701589	0.00926085
Mtf1	222	-3.40695	0.000656921	0.00886183
Meis2	839	-3.4103	0.000648903	0.00879788
Glis3	187	-3.44419	0.000572782	0.00816803
Irf9	335	-3.44641	0.000568096	0.00812278
Atf6	336	-3.46294	0.000534302	0.00786355
Zbtb18	40	-3.47621	0.000508557	0.00762391
Six5	714	-3.53053	0.000414723	0.00668077
Zfp677	165	-3.59629	0.000322786	0.00581923
Mnx1	268	-3.6247	0.000289296	0.00539315
Nfatc2	316	-3.6604	0.000251825	0.00495257
Zfhx2	770	-3.6712	0.000241413	0.00483638
Grhl3	103	-3.7168	0.000201766	0.00430795
Sox13	215	-3.75999	0.000169918	0.00385746
Mlxipl	589	-3.76316	0.000167783	0.00382906
Zfp341	359	-3.76336	0.000167648	0.00382906
Elf1	586	-3.78905	0.000151222	0.00363977
Zfp710	1045	-3.7943	0.000148062	0.00358892
Irf6	453	-3.86265	0.000112165	0.00301861
Zfp791	167	-3.86447	0.000111333	0.00300374
Hlx	102	-3.87013	0.000108778	0.00297088
Nkx6-1	964	-3.96834	7.23738e-05	0.00233244
Zfp516	522	-3.96902	7.21673e-05	0.00233244
Tox3	89	-3.97527	7.03001e-05	0.00232272
Camta2	602	-4.03817	5.38694e-05	0.00208075
9130023H24Rik	230	-4.12174	3.76026e-05	0.00171923
Zkscan16	328	-4.13901	3.48812e-05	0.00166055
Zfhx3	540	-4.18568	2.84311e-05	0.00156667
Bhlha15	786	-4.20297	2.63432e-05	0.0015387
Pbx3	490	-4.30634	1.65979e-05	0.00121731
Mbd2	281	-4.32488	1.52612e-05	0.00115405
Pax6	400	-4.75448	1.98953e-06	0.000380636
Tfcp2l1	294	-4.88692	1.02424e-06	0.000271889
Foxo6	329	-4.98223	6.2857e-07	0.000241057

## Sheet: Bio-miRTa
genes	TargetScan	miRanda	DIANA	PITA	TarBase	starBase	PS	miR.181cd..FC	miR.181cd..pval.adj	Master.Reg.Viper.score	Master.Reg.Viper.FDR	BS	RS
MEIS2		mmu-miR-181c(2)//mmu-miR-181d(2)	mmu-miR-181c-5p(1)//mmu-miR-181d-5p(1)			miR-181c-5p(1)//miR-181d-5p(1)	0.5	-0.955641	0.00113003	-3.4103	0.00879788	6	6.5
SIX4	mmu-miR-181c-5p(1)//mmu-miR-181d-5p(1)	mmu-miR-181c(1)//mmu-miR-181d(1)	mmu-miR-181c-5p(1)//mmu-miR-181d-5p(1)			miR-181c-5p(1)//miR-181d-5p(1)	0.65	-1.16583	0.00849475	-2.87519	0.0309507	5	5.65
BHLHE41	mmu-miR-181c-5p(1)//mmu-miR-181d-5p(1)		mmu-miR-181c-5p(1)//mmu-miR-181d-5p(1)			miR-181c-5p(1)//miR-181d-5p(1)	0.5	-1.07063	0.00230122	-3.1553	0.0162421	5	5.5
NR6A1	mmu-miR-181c-5p(1)//mmu-miR-181d-5p(1)	mmu-miR-181c(2)//mmu-miR-181d(2)	mmu-miR-181c-5p(1)//mmu-miR-181d-5p(1)	mmu-miR-181c(1)//mmu-miR-181d(1)	miR-181c-5p(1)//miR-181d-5p(1)	miR-181c-5p(1)//miR-181d-5p(1)	1	NA	NA	-3.33254	0.0105972	3	4
TCF7L2	mmu-miR-181c-5p(1)//mmu-miR-181d-5p(1)	mmu-miR-181c(2)//mmu-miR-181d(3)	mmu-miR-181c-5p(1)//mmu-miR-181d-5p(1)		miR-181c-5p(1)//miR-181d-5p(1)	miR-181c-5p(1)//miR-181d-5p(1)	0.85	NA	NA	-2.88717	0.0301813	3	3.85
AFF1	mmu-miR-181c-5p(1)//mmu-miR-181d-5p(1)	mmu-miR-181c(1)//mmu-miR-181d(1)	mmu-miR-181c-5p(1)//mmu-miR-181d-5p(1)	mmu-miR-181c(1)//mmu-miR-181d(1)		miR-181c-5p(1)//miR-181d-5p(1)	0.8	NA	NA	-3.11451	0.0178726	3	3.8
CAMTA2	mmu-miR-181c-5p(1)//mmu-miR-181d-5p(1)	mmu-miR-181c(1)//mmu-miR-181d(1)	mmu-miR-181c-5p(1)//mmu-miR-181d-5p(1)	mmu-miR-181c(1)//mmu-miR-181d(1)		miR-181c-5p(1)//miR-181d-5p(1)	0.8	NA	NA	-4.03817	0.00208075	3	3.8
HEY2	mmu-miR-181c-5p(1)//mmu-miR-181d-5p(1)	mmu-miR-181c(2)//mmu-miR-181d(2)	mmu-miR-181c-5p(1)//mmu-miR-181d-5p(1)	mmu-miR-181c(1)//mmu-miR-181d(1)		miR-181c-5p(1)//miR-181d-5p(1)	0.8	NA	NA	-3.35499	0.0100388	3	3.8
SALL4	mmu-miR-181c-5p(1)//mmu-miR-181d-5p(1)	mmu-miR-181c(2)//mmu-miR-181d(2)	mmu-miR-181c-5p(1)//mmu-miR-181d-5p(1)	mmu-miR-181c(1)//mmu-miR-181d(1)		miR-181c-5p(1)//miR-181d-5p(1)	0.8	NA	NA	-3.08032	0.0191575	3	3.8
ZFHX3	mmu-miR-181c-5p(1)//mmu-miR-181d-5p(1)	mmu-miR-181c(1)//mmu-miR-181d(1)	mmu-miR-181c-5p(1)//mmu-miR-181d-5p(1)	mmu-miR-181c(1)//mmu-miR-181d(1)		miR-181c-5p(1)//miR-181d-5p(1)	0.8	NA	NA	-4.18568	0.00156667	3	3.8
MTF1	mmu-miR-181c-5p(1)//mmu-miR-181d-5p(1)	mmu-miR-181c(1)	mmu-miR-181c-5p(1)//mmu-miR-181d-5p(1)	mmu-miR-181c(1)//mmu-miR-181d(1)		miR-181c-5p(1)//miR-181d-5p(1)	0.725	NA	NA	-3.40695	0.00886183	3	3.725
IKZF2		mmu-miR-181c(1)//mmu-miR-181d(2)	mmu-miR-181c-5p(1)//mmu-miR-181d-5p(1)	mmu-miR-181c(1)//mmu-miR-181d(1)		miR-181c-5p(1)//miR-181d-5p(1)	0.65	NA	NA	-3.02404	0.0218682	3	3.65
MITF	mmu-miR-181c-5p(1)//mmu-miR-181d-5p(1)	mmu-miR-181c(1)//mmu-miR-181d(1)	mmu-miR-181c-5p(1)//mmu-miR-181d-5p(1)			miR-181c-5p(1)//miR-181d-5p(1)	0.65	NA	NA	-2.72912	0.0442798	3	3.65
PBX3	mmu-miR-181c-5p(1)//mmu-miR-181d-5p(1)	mmu-miR-181d(2)	mmu-miR-181c-5p(1)//mmu-miR-181d-5p(1)			miR-181c-5p(1)//miR-181d-5p(1)	0.575	NA	NA	-4.30634	0.00121731	3	3.575
VDR		mmu-miR-181c(1)//mmu-miR-181d(1)	mmu-miR-181c-5p(1)//mmu-miR-181d-5p(1)			miR-181c-5p(1)//miR-181d-5p(1)	0.5	NA	NA	-3.01619	0.0222926	3	3.5
ZXDB		mmu-miR-181c(2)//mmu-miR-181d(3)	mmu-miR-181c-5p(1)//mmu-miR-181d-5p(1)			miR-181c-5p(1)//miR-181d-5p(1)	0.5	NA	NA	-3.08297	0.0190647	3	3.5
ELF1		mmu-miR-181c(1)			miR-181c-5p(1)//miR-181d-5p(1)	miR-181c-5p(1)//miR-181d-5p(1)	0.475	NA	NA	-3.78905	0.00363977	3	3.475
ATF6			mmu-miR-181c-5p(1)//mmu-miR-181d-5p(1)			miR-181c-5p(1)//miR-181d-5p(1)	0.35	NA	NA	-3.46294	0.00786355	3	3.35
FOXN3		mmu-miR-181c(1)//mmu-miR-181d(1)				miR-181c-5p(1)//miR-181d-5p(1)	0.35	NA	NA	-2.77391	0.0397023	3	3.35
GRHL1			mmu-miR-181c-5p(1)//mmu-miR-181d-5p(1)			miR-181c-5p(1)//miR-181d-5p(1)	0.35	NA	NA	-3.32549	0.0107518	3	3.35
MNX1	mmu-miR-181c-5p(1)//mmu-miR-181d-5p(1)					miR-181c-5p(1)//miR-181d-5p(1)	0.35	NA	NA	-3.6247	0.00539315	3	3.35
GLIS3	mmu-miR-181c-5p(1)//mmu-miR-181d-5p(1)		mmu-miR-181c-5p(1)//mmu-miR-181d-5p(1)				0.3	NA	NA	-3.44419	0.00816803	3	3.3
MEIS1		mmu-miR-181c(2)//mmu-miR-181d(2)	mmu-miR-181c-5p(1)//mmu-miR-181d-5p(1)				0.3	NA	NA	-2.70094	0.0470211	3	3.3
MLXIPL		mmu-miR-181c(1)//mmu-miR-181d(1)	mmu-miR-181c-5p(1)//mmu-miR-181d-5p(1)				0.3	NA	NA	-3.76316	0.00382906	3	3.3
TOX3		mmu-miR-181c(1)//mmu-miR-181d(1)	mmu-miR-181c-5p(1)//mmu-miR-181d-5p(1)				0.3	NA	NA	-3.97527	0.00232272	3	3.3
MAFK			mmu-miR-181d-5p(1)			miR-181d-5p(1)	0.175	NA	NA	-3.38232	0.00939518	3	3.175
SOX7		mmu-miR-181d(1)				miR-181d-5p(1)	0.175	NA	NA	-2.79295	0.0377924	3	3.175
ZBTB40		mmu-miR-181d(1)				miR-181d-5p(1)	0.175	NA	NA	-3.01622	0.0222926	3	3.175
IRF6		mmu-miR-181d(1)	mmu-miR-181d-5p(1)				0.15	NA	NA	-3.86265	0.00301861	3	3.15
ZFP516		mmu-miR-181d(1)	mmu-miR-181d-5p(1)				0.15	NA	NA	-3.96902	0.00233244	3	3.15
ATXN1	mmu-miR-181c-5p(2)//mmu-miR-181d-5p(2)	mmu-miR-181c(1)//mmu-miR-181d(1)	mmu-miR-181c-5p(1)//mmu-miR-181d-5p(1)	mmu-miR-181c(1)//mmu-miR-181d(1)	miR-181c-5p(1)//miR-181d-5p(1)	miR-181c-5p(1)//miR-181d-5p(1)	1	-1.30178	0.00255379	NA	NA	2	3
BTBD3	mmu-miR-181c-5p(2)//mmu-miR-181d-5p(2)	mmu-miR-181c(2)//mmu-miR-181d(2)	mmu-miR-181c-5p(1)//mmu-miR-181d-5p(1)	mmu-miR-181c(2)//mmu-miR-181d(2)	miR-181c-5p(1)//miR-181d-5p(1)	miR-181c-5p(1)//miR-181d-5p(1)	1	-0.947066	0.00148043	NA	NA	2	3
FOS	mmu-miR-181c-5p(1)//mmu-miR-181d-5p(1)	mmu-miR-181c(2)//mmu-miR-181d(2)	mmu-miR-181c-5p(1)//mmu-miR-181d-5p(1)	mmu-miR-181c(1)//mmu-miR-181d(1)	miR-181c-5p(1)//miR-181d-5p(1)	miR-181c-5p(1)//miR-181d-5p(1)	1	-2.5611	0.00130544	NA	NA	2	3
MAN2A1	mmu-miR-181c-5p(1)//mmu-miR-181d-5p(1)	mmu-miR-181c(1)//mmu-miR-181d(1)	mmu-miR-181c-5p(1)//mmu-miR-181d-5p(1)	mmu-miR-181c(1)//mmu-miR-181d(1)	miR-181c-5p(1)//miR-181d-5p(1)	miR-181c-5p(1)//miR-181d-5p(1)	1	-1.07882	0.000966472	NA	NA	2	3
PAM	mmu-miR-181c-5p(1)//mmu-miR-181d-5p(1)	mmu-miR-181c(1)//mmu-miR-181d(1)	mmu-miR-181c-5p(1)//mmu-miR-181d-5p(1)	mmu-miR-181c(1)//mmu-miR-181d(1)	miR-181c-5p(1)//miR-181d-5p(1)	miR-181c-5p(1)//miR-181d-5p(1)	1	-1.23737	0.000552757	NA	NA	2	3
RBBP7	mmu-miR-181c-5p(1)//mmu-miR-181d-5p(1)	mmu-miR-181c(1)//mmu-miR-181d(1)	mmu-miR-181c-5p(1)//mmu-miR-181d-5p(1)	mmu-miR-181c(1)//mmu-miR-181d(1)	miR-181c-5p(1)//miR-181d-5p(1)	miR-181c-5p(1)//miR-181d-5p(1)	1	-0.987128	0.000696409	NA	NA	2	3
SLC25A36	mmu-miR-181c-5p(1)//mmu-miR-181d-5p(1)	mmu-miR-181c(1)//mmu-miR-181d(1)	mmu-miR-181c-5p(1)//mmu-miR-181d-5p(1)	mmu-miR-181d(1)	miR-181c-5p(1)//miR-181d-5p(1)	miR-181c-5p(1)//miR-181d-5p(1)	0.925	-0.976722	0.000881122	NA	NA	2	2.925
AKT3	mmu-miR-181c-5p(1)//mmu-miR-181d-5p(1)	mmu-miR-181c(3)//mmu-miR-181d(4)	mmu-miR-181c-5p(1)//mmu-miR-181d-5p(1)	mmu-miR-181c(1)//mmu-miR-181d(1)	miR-181c-5p(1)	miR-181c-5p(1)//miR-181d-5p(1)	0.9	-0.932315	0.0019011	NA	NA	2	2.9
HMBS	mmu-miR-181c-5p(1)//mmu-miR-181d-5p(1)	mmu-miR-181c(2)//mmu-miR-181d(1)	mmu-miR-181c-5p(1)//mmu-miR-181d-5p(1)	mmu-miR-181c(1)//mmu-miR-181d(1)	miR-181c-5p(1)	miR-181c-5p(1)//miR-181d-5p(1)	0.9	-1.12986	0.00112498	NA	NA	2	2.9
SYNPR	mmu-miR-181c-5p(1)//mmu-miR-181d-5p(1)	mmu-miR-181c(1)//mmu-miR-181d(1)	mmu-miR-181c-5p(1)//mmu-miR-181d-5p(1)	mmu-miR-181c(1)//mmu-miR-181d(1)	miR-181c-5p(1)	miR-181c-5p(1)//miR-181d-5p(1)	0.9	-1.14026	0.00201255	NA	NA	2	2.9
ACSL4		mmu-miR-181c(1)//mmu-miR-181d(1)	mmu-miR-181c-5p(1)//mmu-miR-181d-5p(1)	mmu-miR-181c(1)//mmu-miR-181d(1)	miR-181c-5p(1)//miR-181d-5p(1)	miR-181c-5p(1)//miR-181d-5p(1)	0.85	-1.29613	0.00151277	NA	NA	2	2.85
BHLHE40	mmu-miR-181c-5p(1)//mmu-miR-181d-5p(1)	mmu-miR-181c(1)//mmu-miR-181d(1)	mmu-miR-181c-5p(1)//mmu-miR-181d-5p(1)		miR-181c-5p(1)//miR-181d-5p(1)	miR-181c-5p(1)//miR-181d-5p(1)	0.85	-2.40682	0.00180252	NA	NA	2	2.85
ITGB8	mmu-miR-181c-5p(2)//mmu-miR-181d-5p(2)	mmu-miR-181c(1)//mmu-miR-181d(1)	mmu-miR-181c-5p(1)//mmu-miR-181d-5p(1)		miR-181c-5p(1)//miR-181d-5p(1)	miR-181c-5p(1)//miR-181d-5p(1)	0.85	-0.932551	0.00270621	NA	NA	2	2.85
RORA	mmu-miR-181c-5p(2)//mmu-miR-181d-5p(2)	mmu-miR-181c(1)//mmu-miR-181d(1)	mmu-miR-181c-5p(1)//mmu-miR-181d-5p(1)		miR-181c-5p(1)//miR-181d-5p(1)	miR-181c-5p(1)//miR-181d-5p(1)	0.85	-1.10341	0.0033887	NA	NA	2	2.85
DPP10	mmu-miR-181c-5p(1)//mmu-miR-181d-5p(1)	mmu-miR-181c(3)//mmu-miR-181d(1)	mmu-miR-181c-5p(1)//mmu-miR-181d-5p(1)	mmu-miR-181c(1)//mmu-miR-181d(1)		miR-181c-5p(1)//miR-181d-5p(1)	0.8	-1.42727	0.00221041	NA	NA	2	2.8
KCNC2	mmu-miR-181c-5p(1)//mmu-miR-181d-5p(1)	mmu-miR-181c(2)//mmu-miR-181d(2)	mmu-miR-181c-5p(1)//mmu-miR-181d-5p(1)	mmu-miR-181c(1)//mmu-miR-181d(1)		miR-181c-5p(1)//miR-181d-5p(1)	0.8	-1.82538	0.00154637	NA	NA	2	2.8
KCNMA1	mmu-miR-181c-5p(1)//mmu-miR-181d-5p(1)	mmu-miR-181c(2)//mmu-miR-181d(2)	mmu-miR-181c-5p(1)//mmu-miR-181d-5p(1)	mmu-miR-181c(1)//mmu-miR-181d(1)		miR-181c-5p(1)//miR-181d-5p(1)	0.8	-1.10138	0.00564059	NA	NA	2	2.8
MBOAT2	mmu-miR-181c-5p(2)//mmu-miR-181d-5p(2)	mmu-miR-181c(2)//mmu-miR-181d(2)	mmu-miR-181c-5p(1)//mmu-miR-181d-5p(1)	mmu-miR-181c(2)//mmu-miR-181d(2)		miR-181c-5p(1)//miR-181d-5p(1)	0.8	-1.03241	0.00166594	NA	NA	2	2.8
PKNOX2	mmu-miR-181c-5p(2)//mmu-miR-181d-5p(2)	mmu-miR-181c(2)//mmu-miR-181d(2)	mmu-miR-181c-5p(1)//mmu-miR-181d-5p(1)	mmu-miR-181c(2)//mmu-miR-181d(2)		miR-181c-5p(1)//miR-181d-5p(1)	0.8	-1.31562	0.00273246	NA	NA	2	2.8
SGPP1	mmu-miR-181c-5p(1)//mmu-miR-181d-5p(1)	mmu-miR-181c(1)//mmu-miR-181d(1)	mmu-miR-181c-5p(1)//mmu-miR-181d-5p(1)	mmu-miR-181c(1)//mmu-miR-181d(1)		miR-181c-5p(1)//miR-181d-5p(1)	0.8	-1.13522	0.0014232	NA	NA	2	2.8
SLITRK1	mmu-miR-181c-5p(2)//mmu-miR-181d-5p(2)	mmu-miR-181c(2)//mmu-miR-181d(2)	mmu-miR-181c-5p(1)//mmu-miR-181d-5p(1)	mmu-miR-181c(2)//mmu-miR-181d(2)		miR-181c-5p(1)//miR-181d-5p(1)	0.8	-1.67391	0.00297861	NA	NA	2	2.8
STC1	mmu-miR-181c-5p(1)//mmu-miR-181d-5p(1)	mmu-miR-181c(1)//mmu-miR-181d(1)	mmu-miR-181c-5p(1)//mmu-miR-181d-5p(1)	mmu-miR-181c(1)//mmu-miR-181d(1)		miR-181c-5p(1)//miR-181d-5p(1)	0.8	-1.54933	0.00400101	NA	NA	2	2.8
SYNE1	mmu-miR-181c-5p(1)//mmu-miR-181d-5p(1)	mmu-miR-181c(4)//mmu-miR-181d(4)	mmu-miR-181c-5p(1)//mmu-miR-181d-5p(1)	mmu-miR-181c(2)//mmu-miR-181d(2)		miR-181c-5p(1)//miR-181d-5p(1)	0.8	-1.03307	0.00646308	NA	NA	2	2.8
ZADH2	mmu-miR-181c-5p(1)//mmu-miR-181d-5p(1)	mmu-miR-181c(1)//mmu-miR-181d(1)	mmu-miR-181c-5p(1)//mmu-miR-181d-5p(1)	mmu-miR-181c(1)//mmu-miR-181d(1)		miR-181c-5p(1)//miR-181d-5p(1)	0.8	-0.963377	0.00164997	NA	NA	2	2.8
NMNAT3	mmu-miR-181c-5p(1)//mmu-miR-181d-5p(1)	mmu-miR-181c(1)//mmu-miR-181d(1)	mmu-miR-181c-5p(1)//mmu-miR-181d-5p(1)	mmu-miR-181d(1)		miR-181c-5p(1)//miR-181d-5p(1)	0.725	-0.936654	0.00872272	NA	NA	2	2.725
PROX1	mmu-miR-181c-5p(2)//mmu-miR-181d-5p(2)	mmu-miR-181c(1)//mmu-miR-181d(1)	mmu-miR-181c-5p(1)//mmu-miR-181d-5p(1)	mmu-miR-181d(1)		miR-181c-5p(1)//miR-181d-5p(1)	0.725	-1.02032	0.00109224	NA	NA	2	2.725
CD164		mmu-miR-181c(1)//mmu-miR-181d(1)	mmu-miR-181c-5p(1)//mmu-miR-181d-5p(1)		miR-181c-5p(1)//miR-181d-5p(1)	miR-181c-5p(1)//miR-181d-5p(1)	0.7	-0.952994	0.00100518	NA	NA	2	2.7
CREBL2		mmu-miR-181c(4)//mmu-miR-181d(4)	mmu-miR-181c-5p(1)//mmu-miR-181d-5p(1)		miR-181c-5p(1)//miR-181d-5p(1)	miR-181c-5p(1)//miR-181d-5p(1)	0.7	-1.18656	0.00179485	NA	NA	2	2.7
FAM117A		mmu-miR-181c(1)//mmu-miR-181d(2)	mmu-miR-181c-5p(1)//mmu-miR-181d-5p(1)		miR-181c-5p(1)//miR-181d-5p(1)	miR-181c-5p(1)//miR-181d-5p(1)	0.7	-1.09247	0.00180375	NA	NA	2	2.7
GFPT1	mmu-miR-181c-5p(1)//mmu-miR-181d-5p(1)		mmu-miR-181c-5p(1)//mmu-miR-181d-5p(1)		miR-181c-5p(1)//miR-181d-5p(1)	miR-181c-5p(1)//miR-181d-5p(1)	0.7	-1.05617	0.00111749	NA	NA	2	2.7
TMEM123		mmu-miR-181c(2)//mmu-miR-181d(2)	mmu-miR-181c-5p(1)//mmu-miR-181d-5p(1)		miR-181c-5p(1)//miR-181d-5p(1)	miR-181c-5p(1)//miR-181d-5p(1)	0.7	-1.07916	0.00345531	NA	NA	2	2.7
ARMCX3		mmu-miR-181c(4)//mmu-miR-181d(4)	mmu-miR-181c-5p(1)//mmu-miR-181d-5p(1)	mmu-miR-181c(1)//mmu-miR-181d(1)		miR-181c-5p(1)//miR-181d-5p(1)	0.65	-1.24072	0.00306682	NA	NA	2	2.65
CDH8		mmu-miR-181c(1)//mmu-miR-181d(1)	mmu-miR-181c-5p(1)//mmu-miR-181d-5p(1)	mmu-miR-181c(1)//mmu-miR-181d(1)		miR-181c-5p(1)//miR-181d-5p(1)	0.65	-0.93763	0.000589244	NA	NA	2	2.65
DCLK1		mmu-miR-181c(6)//mmu-miR-181d(9)	mmu-miR-181c-5p(1)//mmu-miR-181d-5p(1)	mmu-miR-181c(2)//mmu-miR-181d(2)		miR-181c-5p(1)//miR-181d-5p(1)	0.65	-1.28798	0.00382242	NA	NA	2	2.65
EDIL3		mmu-miR-181c(3)//mmu-miR-181d(6)	mmu-miR-181c-5p(1)//mmu-miR-181d-5p(1)	mmu-miR-181c(2)//mmu-miR-181d(2)		miR-181c-5p(1)//miR-181d-5p(1)	0.65	-1.04925	0.00599805	NA	NA	2	2.65
EPHA7	mmu-miR-181c-5p(1)//mmu-miR-181d-5p(1)	mmu-miR-181c(3)//mmu-miR-181d(4)	mmu-miR-181c-5p(1)//mmu-miR-181d-5p(1)			miR-181c-5p(1)//miR-181d-5p(1)	0.65	-0.947594	0.00199311	NA	NA	2	2.65
NCALD	mmu-miR-181c-5p(1)//mmu-miR-181d-5p(1)	mmu-miR-181c(1)//mmu-miR-181d(1)	mmu-miR-181c-5p(1)//mmu-miR-181d-5p(1)			miR-181c-5p(1)//miR-181d-5p(1)	0.65	-1.44195	0.00180252	NA	NA	2	2.65
RASSF2	mmu-miR-181c-5p(1)//mmu-miR-181d-5p(1)	mmu-miR-181c(2)//mmu-miR-181d(2)	mmu-miR-181c-5p(1)//mmu-miR-181d-5p(1)			miR-181c-5p(1)//miR-181d-5p(1)	0.65	-1.08934	0.00135517	NA	NA	2	2.65
STK32A	mmu-miR-181c-5p(1)//mmu-miR-181d-5p(1)	mmu-miR-181c(1)//mmu-miR-181d(1)	mmu-miR-181c-5p(1)//mmu-miR-181d-5p(1)			miR-181c-5p(1)//miR-181d-5p(1)	0.65	-1.35443	0.00101092	NA	NA	2	2.65
SYNGR2	mmu-miR-181c-5p(1)//mmu-miR-181d-5p(1)	mmu-miR-181c(1)//mmu-miR-181d(1)	mmu-miR-181c-5p(1)//mmu-miR-181d-5p(1)			miR-181c-5p(1)//miR-181d-5p(1)	0.65	-0.962085	0.00148043	NA	NA	2	2.65
TMED8	mmu-miR-181c-5p(1)//mmu-miR-181d-5p(1)		mmu-miR-181c-5p(1)//mmu-miR-181d-5p(1)	mmu-miR-181c(1)//mmu-miR-181d(1)		miR-181c-5p(1)//miR-181d-5p(1)	0.65	-1.05484	0.00126193	NA	NA	2	2.65
RRAGD		mmu-miR-181d(3)	mmu-miR-181c-5p(1)//mmu-miR-181d-5p(1)		miR-181c-5p(1)//miR-181d-5p(1)	miR-181c-5p(1)//miR-181d-5p(1)	0.625	-1.92843	0.0013109	NA	NA	2	2.625
2310067B10RIK	mmu-miR-181c-5p(2)//mmu-miR-181d-5p(2)	mmu-miR-181c(2)//mmu-miR-181d(2)	mmu-miR-181c-5p(1)//mmu-miR-181d-5p(1)	mmu-miR-181c(1)//mmu-miR-181d(1)			0.6	-0.933033	0.00304601	NA	NA	2	2.6
EGR1	mmu-miR-181c-5p(1)//mmu-miR-181d-5p(1)		mmu-miR-181c-5p(1)//mmu-miR-181d-5p(1)		miR-181c-5p(1)	miR-181c-5p(1)//miR-181d-5p(1)	0.6	-3.06388	0.000681542	NA	NA	2	2.6
GPR146		mmu-miR-181c(1)//mmu-miR-181d(1)	mmu-miR-181c-5p(1)//mmu-miR-181d-5p(1)		miR-181d-5p(1)	miR-181c-5p(1)//miR-181d-5p(1)	0.6	-0.962373	0.00702528	NA	NA	2	2.6
MFSD6	mmu-miR-181c-5p(1)//mmu-miR-181d-5p(1)		mmu-miR-181c-5p(1)//mmu-miR-181d-5p(1)		miR-181c-5p(1)	miR-181c-5p(1)//miR-181d-5p(1)	0.6	-0.926309	0.00182486	NA	NA	2	2.6
SYPL	mmu-miR-181c-5p(1)//mmu-miR-181d-5p(1)	mmu-miR-181c(1)	mmu-miR-181c-5p(1)//mmu-miR-181d-5p(1)			miR-181c-5p(1)//miR-181d-5p(1)	0.575	-1.17035	0.0022295	NA	NA	2	2.575
CREBRF	mmu-miR-181c-5p(2)//mmu-miR-181d-5p(2)				miR-181c-5p(1)//miR-181d-5p(1)	miR-181c-5p(1)//miR-181d-5p(1)	0.55	-1.2891	0.00279147	NA	NA	2	2.55
INSIG1		mmu-miR-181d(2)	mmu-miR-181c-5p(1)		miR-181c-5p(1)//miR-181d-5p(1)	miR-181c-5p(1)//miR-181d-5p(1)	0.55	-1.49553	0.00213051	NA	NA	2	2.55
MBTPS2		mmu-miR-181c(3)//mmu-miR-181d(2)	mmu-miR-181c-5p(1)		miR-181c-5p(1)	miR-181c-5p(1)//miR-181d-5p(1)	0.525	-1.102	0.00444619	NA	NA	2	2.525
CAMK2D		mmu-miR-181c(3)//mmu-miR-181d(3)		mmu-miR-181c(1)//mmu-miR-181d(1)		miR-181c-5p(1)//miR-181d-5p(1)	0.5	-1.0007	0.00207892	NA	NA	2	2.5
CHIC1	mmu-miR-181c-5p(3)//mmu-miR-181d-5p(3)		mmu-miR-181c-5p(1)//mmu-miR-181d-5p(1)			miR-181c-5p(1)//miR-181d-5p(1)	0.5	-1.52963	0.00133947	NA	NA	2	2.5
CNTNAP2	mmu-miR-181c-5p(1)//mmu-miR-181d-5p(1)		mmu-miR-181c-5p(1)//mmu-miR-181d-5p(1)			miR-181c-5p(1)//miR-181d-5p(1)	0.5	-1.00988	0.00224319	NA	NA	2	2.5
ENTPD5		mmu-miR-181c(1)//mmu-miR-181d(2)	mmu-miR-181c-5p(1)//mmu-miR-181d-5p(1)			miR-181c-5p(1)//miR-181d-5p(1)	0.5	-1.00671	0.00220087	NA	NA	2	2.5
GATM		mmu-miR-181c(2)//mmu-miR-181d(1)	mmu-miR-181c-5p(1)//mmu-miR-181d-5p(1)			miR-181c-5p(1)//miR-181d-5p(1)	0.5	-0.989415	0.00143663	NA	NA	2	2.5
LAMP2		mmu-miR-181c(1)//mmu-miR-181d(2)	mmu-miR-181c-5p(1)//mmu-miR-181d-5p(1)			miR-181c-5p(1)//miR-181d-5p(1)	0.5	-0.973326	0.00179171	NA	NA	2	2.5
MFSD1		mmu-miR-181c(2)//mmu-miR-181d(2)	mmu-miR-181c-5p(1)//mmu-miR-181d-5p(1)			miR-181c-5p(1)//miR-181d-5p(1)	0.5	-0.946082	0.00131333	NA	NA	2	2.5
MPV17L		mmu-miR-181c(2)//mmu-miR-181d(3)	mmu-miR-181c-5p(1)//mmu-miR-181d-5p(1)			miR-181c-5p(1)//miR-181d-5p(1)	0.5	-1.06679	0.00178938	NA	NA	2	2.5
NDRG1		mmu-miR-181c(1)//mmu-miR-181d(1)	mmu-miR-181c-5p(1)//mmu-miR-181d-5p(1)			miR-181c-5p(1)//miR-181d-5p(1)	0.5	-0.991108	0.00138272	NA	NA	2	2.5
NSDHL		mmu-miR-181c(1)//mmu-miR-181d(2)	mmu-miR-181c-5p(1)//mmu-miR-181d-5p(1)			miR-181c-5p(1)//miR-181d-5p(1)	0.5	-1.46215	0.000696409	NA	NA	2	2.5
PCDH7		mmu-miR-181c(1)//mmu-miR-181d(1)	mmu-miR-181c-5p(1)//mmu-miR-181d-5p(1)			miR-181c-5p(1)//miR-181d-5p(1)	0.5	-1.43015	0.00772185	NA	NA	2	2.5
PFKP		mmu-miR-181c(1)//mmu-miR-181d(1)	mmu-miR-181c-5p(1)//mmu-miR-181d-5p(1)			miR-181c-5p(1)//miR-181d-5p(1)	0.5	-1.89059	0.00162628	NA	NA	2	2.5
PRLR		mmu-miR-181c(2)//mmu-miR-181d(3)	mmu-miR-181c-5p(1)//mmu-miR-181d-5p(1)			miR-181c-5p(1)//miR-181d-5p(1)	0.5	-1.7182	0.00199311	NA	NA	2	2.5
REEP1		mmu-miR-181c(1)//mmu-miR-181d(1)	mmu-miR-181c-5p(1)//mmu-miR-181d-5p(1)			miR-181c-5p(1)//miR-181d-5p(1)	0.5	-1.10554	0.00878784	NA	NA	2	2.5
RNF182	mmu-miR-181c-5p(1)//mmu-miR-181d-5p(1)		mmu-miR-181c-5p(1)//mmu-miR-181d-5p(1)			miR-181c-5p(1)//miR-181d-5p(1)	0.5	-1.47933	0.00622187	NA	NA	2	2.5
SERPINB8		mmu-miR-181c(1)//mmu-miR-181d(1)	mmu-miR-181c-5p(1)//mmu-miR-181d-5p(1)			miR-181c-5p(1)//miR-181d-5p(1)	0.5	-0.94544	0.0014952	NA	NA	2	2.5
SLC40A1		mmu-miR-181c(1)//mmu-miR-181d(1)	mmu-miR-181c-5p(1)//mmu-miR-181d-5p(1)			miR-181c-5p(1)//miR-181d-5p(1)	0.5	-1.5129	0.000681542	NA	NA	2	2.5
SPSB1		mmu-miR-181c(1)//mmu-miR-181d(1)	mmu-miR-181c-5p(1)//mmu-miR-181d-5p(1)			miR-181c-5p(1)//miR-181d-5p(1)	0.5	-1.02672	0.00176111	NA	NA	2	2.5
SV2B		mmu-miR-181c(1)//mmu-miR-181d(1)	mmu-miR-181c-5p(1)//mmu-miR-181d-5p(1)			miR-181c-5p(1)//miR-181d-5p(1)	0.5	-1.24375	0.00041465	NA	NA	2	2.5
TPP1		mmu-miR-181c(2)//mmu-miR-181d(1)	mmu-miR-181c-5p(1)//mmu-miR-181d-5p(1)			miR-181c-5p(1)//miR-181d-5p(1)	0.5	-0.936365	0.00133947	NA	NA	2	2.5
WDR7		mmu-miR-181c(1)//mmu-miR-181d(1)	mmu-miR-181c-5p(1)//mmu-miR-181d-5p(1)			miR-181c-5p(1)//miR-181d-5p(1)	0.5	-0.950106	0.0011957	NA	NA	2	2.5
C030039L03RIK	mmu-miR-181c-5p(1)//mmu-miR-181d-5p(1)	mmu-miR-181c(1)//mmu-miR-181d(1)	mmu-miR-181c-5p(1)//mmu-miR-181d-5p(1)				0.45	-0.977988	0.00218268	NA	NA	2	2.45
PHF15		mmu-miR-181c(1)//mmu-miR-181d(1)	mmu-miR-181c-5p(1)//mmu-miR-181d-5p(1)	mmu-miR-181c(1)//mmu-miR-181d(1)			0.45	-1.16358	0.00125795	NA	NA	2	2.45
PWWP2B	mmu-miR-181c-5p(1)//mmu-miR-181d-5p(1)	mmu-miR-181c(2)//mmu-miR-181d(2)	mmu-miR-181c-5p(1)//mmu-miR-181d-5p(1)				0.45	-1.28952	0.00376764	NA	NA	2	2.45
TMEM27	mmu-miR-181c-5p(1)//mmu-miR-181d-5p(1)	mmu-miR-181c(1)//mmu-miR-181d(1)	mmu-miR-181c-5p(1)//mmu-miR-181d-5p(1)				0.45	-1.34971	0.00180105	NA	NA	2	2.45
ERO1L		mmu-miR-181c(1)	mmu-miR-181c-5p(1)//mmu-miR-181d-5p(1)			miR-181c-5p(1)//miR-181d-5p(1)	0.425	-1.21738	0.00270621	NA	NA	2	2.425
NLGN1		mmu-miR-181d(2)	mmu-miR-181c-5p(1)//mmu-miR-181d-5p(1)			miR-181c-5p(1)//miR-181d-5p(1)	0.425	-1.14116	0.00436198	NA	NA	2	2.425
RHOQ		mmu-miR-181d(1)	mmu-miR-181c-5p(1)//mmu-miR-181d-5p(1)			miR-181c-5p(1)//miR-181d-5p(1)	0.425	-0.978239	0.0017498	NA	NA	2	2.425
RNF152		mmu-miR-181d(1)	mmu-miR-181c-5p(1)//mmu-miR-181d-5p(1)			miR-181c-5p(1)//miR-181d-5p(1)	0.425	-1.21985	0.00356543	NA	NA	2	2.425
SCD1		mmu-miR-181c(1)//mmu-miR-181d(1)	mmu-miR-181d-5p(1)			miR-181c-5p(1)//miR-181d-5p(1)	0.425	-2.45383	0.00041465	NA	NA	2	2.425
SCG2		mmu-miR-181d(1)	mmu-miR-181c-5p(1)//mmu-miR-181d-5p(1)		miR-181c-5p(1)//miR-181d-5p(1)		0.425	-1.0243	0.00103808	NA	NA	2	2.425
ELOVL6					miR-181c-5p(1)//miR-181d-5p(1)	miR-181c-5p(1)//miR-181d-5p(1)	0.4	-0.994296	0.00521431	NA	NA	2	2.4
ABCA1			mmu-miR-181c-5p(1)//mmu-miR-181d-5p(1)			miR-181c-5p(1)//miR-181d-5p(1)	0.35	-1.12906	0.00041721	NA	NA	2	2.35
CADM2			mmu-miR-181c-5p(1)//mmu-miR-181d-5p(1)			miR-181c-5p(1)//miR-181d-5p(1)	0.35	-0.991752	0.00214523	NA	NA	2	2.35
CDCA7L			mmu-miR-181c-5p(1)//mmu-miR-181d-5p(1)			miR-181c-5p(1)//miR-181d-5p(1)	0.35	-1.19707	0.00121279	NA	NA	2	2.35
DSCR3			mmu-miR-181c-5p(1)//mmu-miR-181d-5p(1)			miR-181c-5p(1)//miR-181d-5p(1)	0.35	-1.08913	0.00113091	NA	NA	2	2.35
FBXO27		mmu-miR-181c(2)//mmu-miR-181d(2)				miR-181c-5p(1)//miR-181d-5p(1)	0.35	-1.00918	0.00485616	NA	NA	2	2.35
GCNT4			mmu-miR-181c-5p(1)//mmu-miR-181d-5p(1)			miR-181c-5p(1)//miR-181d-5p(1)	0.35	-1.23871	0.00261217	NA	NA	2	2.35
KLHL24			mmu-miR-181c-5p(1)//mmu-miR-181d-5p(1)			miR-181c-5p(1)//miR-181d-5p(1)	0.35	-1.04842	0.00254632	NA	NA	2	2.35
MTCH2			mmu-miR-181c-5p(1)//mmu-miR-181d-5p(1)			miR-181c-5p(1)//miR-181d-5p(1)	0.35	-0.973573	0.0011957	NA	NA	2	2.35
NAP1L5			mmu-miR-181c-5p(1)//mmu-miR-181d-5p(1)			miR-181c-5p(1)//miR-181d-5p(1)	0.35	-1.48578	0.0017498	NA	NA	2	2.35
PAFAH2			mmu-miR-181c-5p(1)//mmu-miR-181d-5p(1)			miR-181c-5p(1)//miR-181d-5p(1)	0.35	-1.03885	0.00230252	NA	NA	2	2.35
PALLD	mmu-miR-181c-5p(1)//mmu-miR-181d-5p(1)					miR-181c-5p(1)//miR-181d-5p(1)	0.35	-1.13424	0.0066963	NA	NA	2	2.35
PCDHA2		mmu-miR-181c(2)//mmu-miR-181d(3)				miR-181c-5p(1)//miR-181d-5p(1)	0.35	-1.00865	0.000877215	NA	NA	2	2.35
PFKFB3			mmu-miR-181c-5p(1)//mmu-miR-181d-5p(1)			miR-181c-5p(1)//miR-181d-5p(1)	0.35	-1.44117	0.00218268	NA	NA	2	2.35
PKM			mmu-miR-181c-5p(1)//mmu-miR-181d-5p(1)			miR-181c-5p(1)//miR-181d-5p(1)	0.35	-1.10504	0.00144166	NA	NA	2	2.35
PPARGC1A			mmu-miR-181c-5p(1)//mmu-miR-181d-5p(1)			miR-181c-5p(1)//miR-181d-5p(1)	0.35	-2.03111	0.00111749	NA	NA	2	2.35
SNX30			mmu-miR-181c-5p(1)//mmu-miR-181d-5p(1)			miR-181c-5p(1)//miR-181d-5p(1)	0.35	-0.96482	0.000814439	NA	NA	2	2.35
SORD			mmu-miR-181c-5p(1)//mmu-miR-181d-5p(1)			miR-181c-5p(1)//miR-181d-5p(1)	0.35	-1.67455	0.000987528	NA	NA	2	2.35
TFRC			mmu-miR-181c-5p(1)//mmu-miR-181d-5p(1)			miR-181c-5p(1)//miR-181d-5p(1)	0.35	-0.983853	0.00418922	NA	NA	2	2.35
VLDLR			mmu-miR-181c-5p(1)//mmu-miR-181d-5p(1)			miR-181c-5p(1)//miR-181d-5p(1)	0.35	-1.55826	0.00239017	NA	NA	2	2.35
AARD		mmu-miR-181c(2)//mmu-miR-181d(1)	mmu-miR-181c-5p(1)//mmu-miR-181d-5p(1)				0.3	-0.998838	0.00611208	NA	NA	2	2.3
ADARB2		mmu-miR-181c(2)//mmu-miR-181d(2)	mmu-miR-181c-5p(1)//mmu-miR-181d-5p(1)				0.3	-1.11236	0.000681542	NA	NA	2	2.3
AKR1C14		mmu-miR-181c(1)//mmu-miR-181d(1)	mmu-miR-181c-5p(1)//mmu-miR-181d-5p(1)				0.3	-1.14915	0.00250062	NA	NA	2	2.3
ALDOART1		mmu-miR-181c(2)//mmu-miR-181d(2)	mmu-miR-181c-5p(1)//mmu-miR-181d-5p(1)				0.3	-1.55332	0.00827308	NA	NA	2	2.3
ANXA4		mmu-miR-181c(3)//mmu-miR-181d(3)	mmu-miR-181c-5p(1)//mmu-miR-181d-5p(1)				0.3	-1.55233	0.00056839	NA	NA	2	2.3
BCL6B		mmu-miR-181c(3)//mmu-miR-181d(3)	mmu-miR-181c-5p(1)//mmu-miR-181d-5p(1)				0.3	-1.08536	0.00117765	NA	NA	2	2.3
CNTN1		mmu-miR-181c(3)//mmu-miR-181d(4)	mmu-miR-181c-5p(1)//mmu-miR-181d-5p(1)				0.3	-1.12528	0.00249128	NA	NA	2	2.3
DDIT4L		mmu-miR-181c(1)//mmu-miR-181d(1)	mmu-miR-181c-5p(1)//mmu-miR-181d-5p(1)				0.3	-1.4294	0.00564886	NA	NA	2	2.3
EPB4.1L4B		mmu-miR-181c(1)//mmu-miR-181d(1)	mmu-miR-181c-5p(1)//mmu-miR-181d-5p(1)				0.3	-0.9583	0.000681542	NA	NA	2	2.3
FAM19A1		mmu-miR-181c(1)//mmu-miR-181d(1)	mmu-miR-181c-5p(1)//mmu-miR-181d-5p(1)				0.3	-0.972185	0.00222911	NA	NA	2	2.3
GEMIN8		mmu-miR-181c(1)//mmu-miR-181d(1)	mmu-miR-181c-5p(1)//mmu-miR-181d-5p(1)				0.3	-1.07388	0.00202385	NA	NA	2	2.3
GM16039		mmu-miR-181c(2)//mmu-miR-181d(2)	mmu-miR-181c-5p(1)//mmu-miR-181d-5p(1)				0.3	-1.10099	0.00271039	NA	NA	2	2.3
IL1R1		mmu-miR-181c(1)//mmu-miR-181d(1)	mmu-miR-181c-5p(1)//mmu-miR-181d-5p(1)				0.3	-1.30973	0.00119504	NA	NA	2	2.3
NR1H4		mmu-miR-181c(3)//mmu-miR-181d(3)	mmu-miR-181c-5p(1)//mmu-miR-181d-5p(1)				0.3	-0.991145	0.00343942	NA	NA	2	2.3
RSPH4A		mmu-miR-181c(1)//mmu-miR-181d(1)	mmu-miR-181c-5p(1)//mmu-miR-181d-5p(1)				0.3	-1.39209	0.007666	NA	NA	2	2.3
SLC6A19		mmu-miR-181c(2)//mmu-miR-181d(2)	mmu-miR-181c-5p(1)//mmu-miR-181d-5p(1)				0.3	-1.23337	0.00278984	NA	NA	2	2.3
SPHKAP		mmu-miR-181c(1)//mmu-miR-181d(1)	mmu-miR-181c-5p(1)//mmu-miR-181d-5p(1)				0.3	-1.06313	0.00169723	NA	NA	2	2.3
TMEM144		mmu-miR-181c(1)//mmu-miR-181d(1)	mmu-miR-181c-5p(1)//mmu-miR-181d-5p(1)				0.3	-0.961435	0.00122599	NA	NA	2	2.3
TRMT2B		mmu-miR-181c(1)//mmu-miR-181d(1)	mmu-miR-181c-5p(1)//mmu-miR-181d-5p(1)				0.3	-1.01098	0.00109224	NA	NA	2	2.3
BCAP29			mmu-miR-181c-5p(1)			miR-181c-5p(1)	0.175	-1.00061	0.00514898	NA	NA	2	2.175
PDK1		mmu-miR-181c(1)				miR-181c-5p(1)	0.175	-1.73957	0.0033695	NA	NA	2	2.175
KIF1A			mmu-miR-181d-5p(1)			miR-181d-5p(1)	0.175	-1.02301	0.000928135	NA	NA	2	2.175
MAPK4		mmu-miR-181d(1)				miR-181d-5p(1)	0.175	-1.00889	0.00146197	NA	NA	2	2.175
NAP1L2		mmu-miR-181d(1)				miR-181d-5p(1)	0.175	-1.05487	0.00176192	NA	NA	2	2.175
PCDH11X		mmu-miR-181d(2)				miR-181d-5p(1)	0.175	-1.94251	0.00179389	NA	NA	2	2.175
RASGRP1		mmu-miR-181d(1)				miR-181d-5p(1)	0.175	-1.48411	0.00179389	NA	NA	2	2.175
STARD4		mmu-miR-181d(1)				miR-181d-5p(1)	0.175	-1.42851	0.000681542	NA	NA	2	2.175
TACC2		mmu-miR-181d(1)				miR-181d-5p(1)	0.175	-0.968147	0.000987528	NA	NA	2	2.175
WIPF1			mmu-miR-181d-5p(1)		miR-181d-5p(1)		0.175	-1.05058	0.00705831	NA	NA	2	2.175
TRPC4		mmu-miR-181c(2)	mmu-miR-181c-5p(1)				0.15	-0.961983	0.00670759	NA	NA	2	2.15
ZDHHC2		mmu-miR-181c(1)	mmu-miR-181c-5p(1)				0.15	-1.38379	0.00185719	NA	NA	2	2.15
DPP4		mmu-miR-181d(1)	mmu-miR-181d-5p(1)				0.15	-0.997294	0.00160722	NA	NA	2	2.15
FSTL5		mmu-miR-181d(1)	mmu-miR-181d-5p(1)				0.15	-1.05915	0.00221041	NA	NA	2	2.15
GALR1		mmu-miR-181d(1)	mmu-miR-181d-5p(1)				0.15	-1.07712	0.00185575	NA	NA	2	2.15
AQP4		mmu-miR-181c(1)//mmu-miR-181d(1)	mmu-miR-181c-5p(1)//mmu-miR-181d-5p(1)			miR-181c-5p(1)//miR-181d-5p(1)	0.5	NA	NA	NA	NA	1	1.5
SYTL4		mmu-miR-181c(1)//mmu-miR-181d(1)	mmu-miR-181c-5p(1)//mmu-miR-181d-5p(1)			miR-181c-5p(1)//miR-181d-5p(1)	0.5	NA	NA	NA	NA	1	1.5
CDCP1		mmu-miR-181c(1)//mmu-miR-181d(1)			miR-181d-5p(1)	miR-181c-5p(1)//miR-181d-5p(1)	0.45	NA	NA	NA	NA	1	1.45
STX3			mmu-miR-181c-5p(1)//mmu-miR-181d-5p(1)		miR-181c-5p(1)	miR-181c-5p(1)//miR-181d-5p(1)	0.45	NA	NA	NA	NA	1	1.45
ESRP1		mmu-miR-181c(2)//mmu-miR-181d(2)				miR-181c-5p(1)//miR-181d-5p(1)	0.35	NA	NA	NA	NA	1	1.35
SNTG1		mmu-miR-181c(2)//mmu-miR-181d(2)	mmu-miR-181c-5p(1)//mmu-miR-181d-5p(1)				0.3	NA	NA	NA	NA	1	1.3
A330008L17RIK		mmu-miR-181d(1)	mmu-miR-181d-5p(1)				0.15	NA	NA	NA	NA	1	1.15
ADAMTS1	mmu-miR-181c-5p(1)//mmu-miR-181d-5p(1)	mmu-miR-181c(2)//mmu-miR-181d(3)	mmu-miR-181c-5p(1)//mmu-miR-181d-5p(1)	mmu-miR-181c(1)//mmu-miR-181d(1)	miR-181c-5p(1)//miR-181d-5p(1)	miR-181c-5p(1)//miR-181d-5p(1)	1	NA	NA	NA	NA	0	1
ADAMTS5	mmu-miR-181c-5p(1)//mmu-miR-181d-5p(1)	mmu-miR-181c(1)//mmu-miR-181d(1)	mmu-miR-181c-5p(1)//mmu-miR-181d-5p(1)	mmu-miR-181c(1)//mmu-miR-181d(1)	miR-181c-5p(1)//miR-181d-5p(1)	miR-181c-5p(1)//miR-181d-5p(1)	1	NA	NA	NA	NA	0	1
ADM	mmu-miR-181c-5p(1)//mmu-miR-181d-5p(1)	mmu-miR-181c(1)//mmu-miR-181d(1)	mmu-miR-181c-5p(1)//mmu-miR-181d-5p(1)	mmu-miR-181c(1)//mmu-miR-181d(1)	miR-181c-5p(1)//miR-181d-5p(1)	miR-181c-5p(1)//miR-181d-5p(1)	1	NA	NA	NA	NA	0	1
ADO	mmu-miR-181c-5p(1)//mmu-miR-181d-5p(1)	mmu-miR-181c(1)//mmu-miR-181d(1)	mmu-miR-181c-5p(1)//mmu-miR-181d-5p(1)	mmu-miR-181c(1)//mmu-miR-181d(1)	miR-181c-5p(1)//miR-181d-5p(1)	miR-181c-5p(1)//miR-181d-5p(1)	1	NA	NA	NA	NA	0	1
AFTPH	mmu-miR-181c-5p(1)//mmu-miR-181d-5p(1)	mmu-miR-181c(2)//mmu-miR-181d(2)	mmu-miR-181c-5p(1)//mmu-miR-181d-5p(1)	mmu-miR-181c(1)//mmu-miR-181d(1)	miR-181c-5p(1)//miR-181d-5p(1)	miR-181c-5p(1)//miR-181d-5p(1)	1	NA	NA	NA	NA	0	1
ANKRD44	mmu-miR-181c-5p(1)//mmu-miR-181d-5p(1)	mmu-miR-181c(2)//mmu-miR-181d(2)	mmu-miR-181c-5p(1)//mmu-miR-181d-5p(1)	mmu-miR-181c(1)//mmu-miR-181d(1)	miR-181c-5p(1)//miR-181d-5p(1)	miR-181c-5p(1)//miR-181d-5p(1)	1	NA	NA	NA	NA	0	1
ARF6	mmu-miR-181c-5p(1)//mmu-miR-181d-5p(1)	mmu-miR-181c(2)//mmu-miR-181d(4)	mmu-miR-181c-5p(1)//mmu-miR-181d-5p(1)	mmu-miR-181c(2)//mmu-miR-181d(2)	miR-181c-5p(1)//miR-181d-5p(1)	miR-181c-5p(1)//miR-181d-5p(1)	1	NA	NA	NA	NA	0	1
ARRDC3	mmu-miR-181c-5p(1)//mmu-miR-181d-5p(1)	mmu-miR-181c(1)//mmu-miR-181d(1)	mmu-miR-181c-5p(1)//mmu-miR-181d-5p(1)	mmu-miR-181c(1)//mmu-miR-181d(1)	miR-181c-5p(1)//miR-181d-5p(1)	miR-181c-5p(1)//miR-181d-5p(1)	1	NA	NA	NA	NA	0	1
ATP1B1	mmu-miR-181c-5p(2)//mmu-miR-181d-5p(2)	mmu-miR-181c(2)//mmu-miR-181d(3)	mmu-miR-181c-5p(1)//mmu-miR-181d-5p(1)	mmu-miR-181c(1)//mmu-miR-181d(1)	miR-181c-5p(1)//miR-181d-5p(1)	miR-181c-5p(1)//miR-181d-5p(1)	1	NA	NA	NA	NA	0	1
B4GALT1	mmu-miR-181c-5p(1)//mmu-miR-181d-5p(1)	mmu-miR-181c(1)//mmu-miR-181d(1)	mmu-miR-181c-5p(1)//mmu-miR-181d-5p(1)	mmu-miR-181c(1)//mmu-miR-181d(1)	miR-181c-5p(1)//miR-181d-5p(1)	miR-181c-5p(1)//miR-181d-5p(1)	1	NA	NA	NA	NA	0	1
BACH2	mmu-miR-181c-5p(1)//mmu-miR-181d-5p(1)	mmu-miR-181c(1)//mmu-miR-181d(1)	mmu-miR-181c-5p(1)//mmu-miR-181d-5p(1)	mmu-miR-181c(1)//mmu-miR-181d(1)	miR-181c-5p(1)//miR-181d-5p(1)	miR-181c-5p(1)//miR-181d-5p(1)	1	NA	NA	NA	NA	0	1
BAZ2A	mmu-miR-181c-5p(1)//mmu-miR-181d-5p(1)	mmu-miR-181c(1)//mmu-miR-181d(1)	mmu-miR-181c-5p(1)//mmu-miR-181d-5p(1)	mmu-miR-181c(1)//mmu-miR-181d(1)	miR-181c-5p(1)//miR-181d-5p(1)	miR-181c-5p(1)//miR-181d-5p(1)	1	NA	NA	NA	NA	0	1
BCL2L11	mmu-miR-181c-5p(1)//mmu-miR-181d-5p(1)	mmu-miR-181c(1)//mmu-miR-181d(1)	mmu-miR-181c-5p(1)//mmu-miR-181d-5p(1)	mmu-miR-181c(1)//mmu-miR-181d(1)	miR-181c-5p(1)//miR-181d-5p(1)	miR-181c-5p(1)//miR-181d-5p(1)	1	NA	NA	NA	NA	0	1
BIRC6	mmu-miR-181c-5p(2)//mmu-miR-181d-5p(2)	mmu-miR-181c(3)//mmu-miR-181d(3)	mmu-miR-181c-5p(1)//mmu-miR-181d-5p(1)	mmu-miR-181c(2)//mmu-miR-181d(2)	miR-181c-5p(1)//miR-181d-5p(1)	miR-181c-5p(1)//miR-181d-5p(1)	1	NA	NA	NA	NA	0	1
BRWD1	mmu-miR-181c-5p(1)//mmu-miR-181d-5p(1)	mmu-miR-181c(4)//mmu-miR-181d(4)	mmu-miR-181c-5p(1)//mmu-miR-181d-5p(1)	mmu-miR-181c(2)//mmu-miR-181d(2)	miR-181c-5p(1)//miR-181d-5p(1)	miR-181c-5p(1)//miR-181d-5p(1)	1	NA	NA	NA	NA	0	1
CBLB	mmu-miR-181c-5p(2)//mmu-miR-181d-5p(2)	mmu-miR-181c(2)//mmu-miR-181d(2)	mmu-miR-181c-5p(1)//mmu-miR-181d-5p(1)	mmu-miR-181c(2)//mmu-miR-181d(2)	miR-181c-5p(1)//miR-181d-5p(1)	miR-181c-5p(1)//miR-181d-5p(1)	1	NA	NA	NA	NA	0	1
CBX4	mmu-miR-181c-5p(1)//mmu-miR-181d-5p(1)	mmu-miR-181c(1)//mmu-miR-181d(1)	mmu-miR-181c-5p(1)//mmu-miR-181d-5p(1)	mmu-miR-181c(1)//mmu-miR-181d(1)	miR-181c-5p(1)//miR-181d-5p(1)	miR-181c-5p(1)//miR-181d-5p(1)	1	NA	NA	NA	NA	0	1
CCNJ	mmu-miR-181c-5p(1)//mmu-miR-181d-5p(1)	mmu-miR-181c(1)//mmu-miR-181d(1)	mmu-miR-181c-5p(1)//mmu-miR-181d-5p(1)	mmu-miR-181c(1)//mmu-miR-181d(1)	miR-181c-5p(1)//miR-181d-5p(1)	miR-181c-5p(1)//miR-181d-5p(1)	1	NA	NA	NA	NA	0	1
COPS2	mmu-miR-181c-5p(2)//mmu-miR-181d-5p(2)	mmu-miR-181c(2)//mmu-miR-181d(2)	mmu-miR-181c-5p(1)//mmu-miR-181d-5p(1)	mmu-miR-181c(2)//mmu-miR-181d(2)	miR-181c-5p(1)//miR-181d-5p(1)	miR-181c-5p(1)//miR-181d-5p(1)	1	NA	NA	NA	NA	0	1
CSNK1G3	mmu-miR-181c-5p(1)//mmu-miR-181d-5p(1)	mmu-miR-181c(1)//mmu-miR-181d(1)	mmu-miR-181c-5p(1)//mmu-miR-181d-5p(1)	mmu-miR-181c(1)//mmu-miR-181d(1)	miR-181c-5p(1)//miR-181d-5p(1)	miR-181c-5p(1)//miR-181d-5p(1)	1	NA	NA	NA	NA	0	1
CTDSPL	mmu-miR-181c-5p(2)//mmu-miR-181d-5p(2)	mmu-miR-181c(1)//mmu-miR-181d(1)	mmu-miR-181c-5p(1)//mmu-miR-181d-5p(1)	mmu-miR-181c(1)//mmu-miR-181d(2)	miR-181c-5p(1)//miR-181d-5p(1)	miR-181c-5p(1)//miR-181d-5p(1)	1	NA	NA	NA	NA	0	1
CUL3	mmu-miR-181c-5p(2)//mmu-miR-181d-5p(2)	mmu-miR-181c(1)//mmu-miR-181d(1)	mmu-miR-181c-5p(1)//mmu-miR-181d-5p(1)	mmu-miR-181c(1)//mmu-miR-181d(1)	miR-181c-5p(1)//miR-181d-5p(1)	miR-181c-5p(1)//miR-181d-5p(1)	1	NA	NA	NA	NA	0	1
CYB5B	mmu-miR-181c-5p(1)//mmu-miR-181d-5p(1)	mmu-miR-181c(4)//mmu-miR-181d(4)	mmu-miR-181c-5p(1)//mmu-miR-181d-5p(1)	mmu-miR-181c(1)//mmu-miR-181d(1)	miR-181c-5p(1)//miR-181d-5p(1)	miR-181c-5p(1)//miR-181d-5p(1)	1	NA	NA	NA	NA	0	1
CYR61	mmu-miR-181c-5p(1)//mmu-miR-181d-5p(1)	mmu-miR-181c(1)//mmu-miR-181d(1)	mmu-miR-181c-5p(1)//mmu-miR-181d-5p(1)	mmu-miR-181c(1)//mmu-miR-181d(1)	miR-181c-5p(1)//miR-181d-5p(1)	miR-181c-5p(1)//miR-181d-5p(1)	1	NA	NA	NA	NA	0	1
DDIT4	mmu-miR-181c-5p(1)//mmu-miR-181d-5p(1)	mmu-miR-181c(1)//mmu-miR-181d(1)	mmu-miR-181c-5p(1)//mmu-miR-181d-5p(1)	mmu-miR-181c(1)//mmu-miR-181d(1)	miR-181c-5p(1)//miR-181d-5p(1)	miR-181c-5p(1)//miR-181d-5p(1)	1	NA	NA	NA	NA	0	1
DDX3X	mmu-miR-181c-5p(4)//mmu-miR-181d-5p(4)	mmu-miR-181c(3)//mmu-miR-181d(3)	mmu-miR-181c-5p(1)//mmu-miR-181d-5p(1)	mmu-miR-181c(4)//mmu-miR-181d(4)	miR-181c-5p(1)//miR-181d-5p(1)	miR-181c-5p(1)//miR-181d-5p(1)	1	NA	NA	NA	NA	0	1
DNAJB5	mmu-miR-181c-5p(1)//mmu-miR-181d-5p(1)	mmu-miR-181c(1)//mmu-miR-181d(1)	mmu-miR-181c-5p(1)//mmu-miR-181d-5p(1)	mmu-miR-181c(1)//mmu-miR-181d(1)	miR-181c-5p(1)//miR-181d-5p(1)	miR-181c-5p(1)//miR-181d-5p(1)	1	NA	NA	NA	NA	0	1
DPYSL2	mmu-miR-181c-5p(1)//mmu-miR-181d-5p(1)	mmu-miR-181c(1)//mmu-miR-181d(1)	mmu-miR-181c-5p(1)//mmu-miR-181d-5p(1)	mmu-miR-181c(1)//mmu-miR-181d(1)	miR-181c-5p(1)//miR-181d-5p(1)	miR-181c-5p(1)//miR-181d-5p(1)	1	NA	NA	NA	NA	0	1
DYNC1LI2	mmu-miR-181c-5p(1)//mmu-miR-181d-5p(1)	mmu-miR-181c(1)//mmu-miR-181d(1)	mmu-miR-181c-5p(1)//mmu-miR-181d-5p(1)	mmu-miR-181c(1)//mmu-miR-181d(1)	miR-181c-5p(1)//miR-181d-5p(1)	miR-181c-5p(1)//miR-181d-5p(1)	1	NA	NA	NA	NA	0	1
E2F5	mmu-miR-181c-5p(1)//mmu-miR-181d-5p(1)	mmu-miR-181c(1)//mmu-miR-181d(1)	mmu-miR-181c-5p(1)//mmu-miR-181d-5p(1)	mmu-miR-181c(1)//mmu-miR-181d(1)	miR-181c-5p(1)//miR-181d-5p(1)	miR-181c-5p(1)//miR-181d-5p(1)	1	NA	NA	NA	NA	0	1
E2F7	mmu-miR-181c-5p(1)//mmu-miR-181d-5p(1)	mmu-miR-181c(2)//mmu-miR-181d(2)	mmu-miR-181c-5p(1)//mmu-miR-181d-5p(1)	mmu-miR-181c(1)//mmu-miR-181d(1)	miR-181c-5p(1)//miR-181d-5p(1)	miR-181c-5p(1)//miR-181d-5p(1)	1	NA	NA	NA	NA	0	1
EIF4A2	mmu-miR-181c-5p(2)//mmu-miR-181d-5p(2)	mmu-miR-181c(8)//mmu-miR-181d(9)	mmu-miR-181c-5p(1)//mmu-miR-181d-5p(1)	mmu-miR-181c(2)//mmu-miR-181d(2)	miR-181c-5p(1)//miR-181d-5p(1)	miR-181c-5p(1)//miR-181d-5p(1)	1	NA	NA	NA	NA	0	1
EPC2	mmu-miR-181c-5p(1)//mmu-miR-181d-5p(1)	mmu-miR-181c(4)//mmu-miR-181d(4)	mmu-miR-181c-5p(1)//mmu-miR-181d-5p(1)	mmu-miR-181c(1)//mmu-miR-181d(1)	miR-181c-5p(1)//miR-181d-5p(1)	miR-181c-5p(1)//miR-181d-5p(1)	1	NA	NA	NA	NA	0	1
ETS1	mmu-miR-181c-5p(1)//mmu-miR-181d-5p(1)	mmu-miR-181c(1)//mmu-miR-181d(1)	mmu-miR-181c-5p(1)//mmu-miR-181d-5p(1)	mmu-miR-181c(1)//mmu-miR-181d(1)	miR-181c-5p(1)//miR-181d-5p(1)	miR-181c-5p(1)//miR-181d-5p(1)	1	NA	NA	NA	NA	0	1
ETV6	mmu-miR-181c-5p(1)//mmu-miR-181d-5p(1)	mmu-miR-181c(1)//mmu-miR-181d(1)	mmu-miR-181c-5p(1)//mmu-miR-181d-5p(1)	mmu-miR-181c(1)//mmu-miR-181d(1)	miR-181c-5p(1)//miR-181d-5p(1)	miR-181c-5p(1)//miR-181d-5p(1)	1	NA	NA	NA	NA	0	1
FBXL3	mmu-miR-181c-5p(1)//mmu-miR-181d-5p(1)	mmu-miR-181c(2)//mmu-miR-181d(2)	mmu-miR-181c-5p(1)//mmu-miR-181d-5p(1)	mmu-miR-181c(1)//mmu-miR-181d(1)	miR-181c-5p(1)//miR-181d-5p(1)	miR-181c-5p(1)//miR-181d-5p(1)	1	NA	NA	NA	NA	0	1
FBXO11	mmu-miR-181c-5p(1)//mmu-miR-181d-5p(1)	mmu-miR-181c(1)//mmu-miR-181d(1)	mmu-miR-181c-5p(1)//mmu-miR-181d-5p(1)	mmu-miR-181c(1)//mmu-miR-181d(1)	miR-181c-5p(1)//miR-181d-5p(1)	miR-181c-5p(1)//miR-181d-5p(1)	1	NA	NA	NA	NA	0	1
FBXO33	mmu-miR-181c-5p(2)//mmu-miR-181d-5p(2)	mmu-miR-181c(3)//mmu-miR-181d(2)	mmu-miR-181c-5p(1)//mmu-miR-181d-5p(1)	mmu-miR-181c(2)//mmu-miR-181d(2)	miR-181c-5p(1)//miR-181d-5p(1)	miR-181c-5p(1)//miR-181d-5p(1)	1	NA	NA	NA	NA	0	1
FIGN	mmu-miR-181c-5p(4)//mmu-miR-181d-5p(4)	mmu-miR-181c(3)//mmu-miR-181d(3)	mmu-miR-181c-5p(1)//mmu-miR-181d-5p(1)	mmu-miR-181c(2)//mmu-miR-181d(2)	miR-181c-5p(1)//miR-181d-5p(1)	miR-181c-5p(1)//miR-181d-5p(1)	1	NA	NA	NA	NA	0	1
FKBP1A	mmu-miR-181c-5p(1)//mmu-miR-181d-5p(1)	mmu-miR-181c(2)//mmu-miR-181d(3)	mmu-miR-181c-5p(1)//mmu-miR-181d-5p(1)	mmu-miR-181c(1)//mmu-miR-181d(1)	miR-181c-5p(1)//miR-181d-5p(1)	miR-181c-5p(1)//miR-181d-5p(1)	1	NA	NA	NA	NA	0	1
FNDC3A	mmu-miR-181c-5p(1)//mmu-miR-181d-5p(1)	mmu-miR-181c(1)//mmu-miR-181d(1)	mmu-miR-181c-5p(1)//mmu-miR-181d-5p(1)	mmu-miR-181c(1)//mmu-miR-181d(1)	miR-181c-5p(1)//miR-181d-5p(1)	miR-181c-5p(1)//miR-181d-5p(1)	1	NA	NA	NA	NA	0	1
FOXB1	mmu-miR-181c-5p(1)//mmu-miR-181d-5p(1)	mmu-miR-181c(1)//mmu-miR-181d(1)	mmu-miR-181c-5p(1)//mmu-miR-181d-5p(1)	mmu-miR-181c(1)//mmu-miR-181d(1)	miR-181c-5p(1)//miR-181d-5p(1)	miR-181c-5p(1)//miR-181d-5p(1)	1	NA	NA	NA	NA	0	1
G3BP2	mmu-miR-181c-5p(1)//mmu-miR-181d-5p(1)	mmu-miR-181c(1)//mmu-miR-181d(1)	mmu-miR-181c-5p(1)//mmu-miR-181d-5p(1)	mmu-miR-181c(1)//mmu-miR-181d(1)	miR-181c-5p(1)//miR-181d-5p(1)	miR-181c-5p(1)//miR-181d-5p(1)	1	NA	NA	NA	NA	0	1
GCNT2	mmu-miR-181c-5p(1)//mmu-miR-181d-5p(1)	mmu-miR-181c(2)//mmu-miR-181d(2)	mmu-miR-181c-5p(1)//mmu-miR-181d-5p(1)	mmu-miR-181c(1)//mmu-miR-181d(1)	miR-181c-5p(1)//miR-181d-5p(1)	miR-181c-5p(1)//miR-181d-5p(1)	1	NA	NA	NA	NA	0	1
GIGYF1	mmu-miR-181c-5p(3)//mmu-miR-181d-5p(3)	mmu-miR-181c(3)//mmu-miR-181d(3)	mmu-miR-181c-5p(1)//mmu-miR-181d-5p(1)	mmu-miR-181c(3)//mmu-miR-181d(3)	miR-181c-5p(1)//miR-181d-5p(1)	miR-181c-5p(1)//miR-181d-5p(1)	1	NA	NA	NA	NA	0	1
GPBP1	mmu-miR-181c-5p(1)//mmu-miR-181d-5p(1)	mmu-miR-181c(3)//mmu-miR-181d(3)	mmu-miR-181c-5p(1)//mmu-miR-181d-5p(1)	mmu-miR-181c(2)//mmu-miR-181d(2)	miR-181c-5p(1)//miR-181d-5p(1)	miR-181c-5p(1)//miR-181d-5p(1)	1	NA	NA	NA	NA	0	1
GSE1	mmu-miR-181c-5p(1)//mmu-miR-181d-5p(1)	mmu-miR-181c(1)//mmu-miR-181d(1)	mmu-miR-181c-5p(1)//mmu-miR-181d-5p(1)	mmu-miR-181c(1)//mmu-miR-181d(1)	miR-181c-5p(1)//miR-181d-5p(1)	miR-181c-5p(1)//miR-181d-5p(1)	1	NA	NA	NA	NA	0	1
HECA	mmu-miR-181c-5p(1)//mmu-miR-181d-5p(1)	mmu-miR-181c(1)//mmu-miR-181d(2)	mmu-miR-181c-5p(1)//mmu-miR-181d-5p(1)	mmu-miR-181c(1)//mmu-miR-181d(1)	miR-181c-5p(1)//miR-181d-5p(1)	miR-181c-5p(1)//miR-181d-5p(1)	1	NA	NA	NA	NA	0	1
HMGB2	mmu-miR-181c-5p(1)//mmu-miR-181d-5p(1)	mmu-miR-181c(2)//mmu-miR-181d(2)	mmu-miR-181c-5p(1)//mmu-miR-181d-5p(1)	mmu-miR-181c(1)//mmu-miR-181d(1)	miR-181c-5p(1)//miR-181d-5p(1)	miR-181c-5p(1)//miR-181d-5p(1)	1	NA	NA	NA	NA	0	1
HSP90B1	mmu-miR-181c-5p(1)//mmu-miR-181d-5p(1)	mmu-miR-181c(2)//mmu-miR-181d(2)	mmu-miR-181c-5p(1)//mmu-miR-181d-5p(1)	mmu-miR-181c(1)//mmu-miR-181d(1)	miR-181c-5p(1)//miR-181d-5p(1)	miR-181c-5p(1)//miR-181d-5p(1)	1	NA	NA	NA	NA	0	1
IL1A	mmu-miR-181c-5p(1)//mmu-miR-181d-5p(1)	mmu-miR-181c(2)//mmu-miR-181d(2)	mmu-miR-181c-5p(1)//mmu-miR-181d-5p(1)	mmu-miR-181c(1)//mmu-miR-181d(1)	miR-181c-5p(1)//miR-181d-5p(1)	miR-181c-5p(1)//miR-181d-5p(1)	1	NA	NA	NA	NA	0	1
INPP5A	mmu-miR-181c-5p(1)//mmu-miR-181d-5p(1)	mmu-miR-181c(2)//mmu-miR-181d(2)	mmu-miR-181c-5p(1)//mmu-miR-181d-5p(1)	mmu-miR-181c(1)//mmu-miR-181d(1)	miR-181c-5p(1)//miR-181d-5p(1)	miR-181c-5p(1)//miR-181d-5p(1)	1	NA	NA	NA	NA	0	1
KLF6	mmu-miR-181c-5p(2)//mmu-miR-181d-5p(2)	mmu-miR-181c(2)//mmu-miR-181d(3)	mmu-miR-181c-5p(1)//mmu-miR-181d-5p(1)	mmu-miR-181c(2)//mmu-miR-181d(2)	miR-181c-5p(1)//miR-181d-5p(1)	miR-181c-5p(1)//miR-181d-5p(1)	1	NA	NA	NA	NA	0	1
KLHL5	mmu-miR-181c-5p(1)//mmu-miR-181d-5p(1)	mmu-miR-181c(3)//mmu-miR-181d(3)	mmu-miR-181c-5p(1)//mmu-miR-181d-5p(1)	mmu-miR-181c(1)//mmu-miR-181d(1)	miR-181c-5p(1)//miR-181d-5p(1)	miR-181c-5p(1)//miR-181d-5p(1)	1	NA	NA	NA	NA	0	1
LARP4	mmu-miR-181c-5p(2)//mmu-miR-181d-5p(2)	mmu-miR-181c(4)//mmu-miR-181d(4)	mmu-miR-181c-5p(1)//mmu-miR-181d-5p(1)	mmu-miR-181c(2)//mmu-miR-181d(2)	miR-181c-5p(1)//miR-181d-5p(1)	miR-181c-5p(1)//miR-181d-5p(1)	1	NA	NA	NA	NA	0	1
LATS1	mmu-miR-181c-5p(2)//mmu-miR-181d-5p(2)	mmu-miR-181c(2)//mmu-miR-181d(2)	mmu-miR-181c-5p(1)//mmu-miR-181d-5p(1)	mmu-miR-181c(1)//mmu-miR-181d(1)	miR-181c-5p(1)//miR-181d-5p(1)	miR-181c-5p(1)//miR-181d-5p(1)	1	NA	NA	NA	NA	0	1
LBR	mmu-miR-181c-5p(1)//mmu-miR-181d-5p(1)	mmu-miR-181c(1)//mmu-miR-181d(1)	mmu-miR-181c-5p(1)//mmu-miR-181d-5p(1)	mmu-miR-181c(1)//mmu-miR-181d(1)	miR-181c-5p(1)//miR-181d-5p(1)	miR-181c-5p(1)//miR-181d-5p(1)	1	NA	NA	NA	NA	0	1
LIF	mmu-miR-181c-5p(1)//mmu-miR-181d-5p(1)	mmu-miR-181c(2)//mmu-miR-181d(3)	mmu-miR-181c-5p(1)//mmu-miR-181d-5p(1)	mmu-miR-181c(1)//mmu-miR-181d(1)	miR-181c-5p(1)//miR-181d-5p(1)	miR-181c-5p(1)//miR-181d-5p(1)	1	NA	NA	NA	NA	0	1
LIN28B	mmu-miR-181c-5p(2)//mmu-miR-181d-5p(2)	mmu-miR-181c(2)//mmu-miR-181d(2)	mmu-miR-181c-5p(1)//mmu-miR-181d-5p(1)	mmu-miR-181c(2)//mmu-miR-181d(2)	miR-181c-5p(1)//miR-181d-5p(1)	miR-181c-5p(1)//miR-181d-5p(1)	1	NA	NA	NA	NA	0	1
MAP3K1	mmu-miR-181c-5p(1)//mmu-miR-181d-5p(1)	mmu-miR-181c(1)//mmu-miR-181d(1)	mmu-miR-181c-5p(1)//mmu-miR-181d-5p(1)	mmu-miR-181c(1)//mmu-miR-181d(1)	miR-181c-5p(1)//miR-181d-5p(1)	miR-181c-5p(1)//miR-181d-5p(1)	1	NA	NA	NA	NA	0	1
MARK1	mmu-miR-181c-5p(1)//mmu-miR-181d-5p(1)	mmu-miR-181c(1)//mmu-miR-181d(1)	mmu-miR-181c-5p(1)//mmu-miR-181d-5p(1)	mmu-miR-181c(1)//mmu-miR-181d(1)	miR-181c-5p(1)//miR-181d-5p(1)	miR-181c-5p(1)//miR-181d-5p(1)	1	NA	NA	NA	NA	0	1
MBNL1	mmu-miR-181c-5p(1)//mmu-miR-181d-5p(1)	mmu-miR-181c(2)//mmu-miR-181d(2)	mmu-miR-181c-5p(1)//mmu-miR-181d-5p(1)	mmu-miR-181c(1)//mmu-miR-181d(1)	miR-181c-5p(1)//miR-181d-5p(1)	miR-181c-5p(1)//miR-181d-5p(1)	1	NA	NA	NA	NA	0	1
METAP1	mmu-miR-181c-5p(1)//mmu-miR-181d-5p(1)	mmu-miR-181c(2)//mmu-miR-181d(2)	mmu-miR-181c-5p(1)//mmu-miR-181d-5p(1)	mmu-miR-181c(1)//mmu-miR-181d(1)	miR-181c-5p(1)//miR-181d-5p(1)	miR-181c-5p(1)//miR-181d-5p(1)	1	NA	NA	NA	NA	0	1
MSI2	mmu-miR-181c-5p(1)//mmu-miR-181d-5p(1)	mmu-miR-181c(2)//mmu-miR-181d(2)	mmu-miR-181c-5p(1)//mmu-miR-181d-5p(1)	mmu-miR-181c(2)//mmu-miR-181d(2)	miR-181c-5p(1)//miR-181d-5p(1)	miR-181c-5p(1)//miR-181d-5p(1)	1	NA	NA	NA	NA	0	1
MTF2	mmu-miR-181c-5p(2)//mmu-miR-181d-5p(2)	mmu-miR-181c(2)//mmu-miR-181d(3)	mmu-miR-181c-5p(1)//mmu-miR-181d-5p(1)	mmu-miR-181c(2)//mmu-miR-181d(2)	miR-181c-5p(1)//miR-181d-5p(1)	miR-181c-5p(1)//miR-181d-5p(1)	1	NA	NA	NA	NA	0	1
MTPN	mmu-miR-181c-5p(1)//mmu-miR-181d-5p(1)	mmu-miR-181c(2)//mmu-miR-181d(1)	mmu-miR-181c-5p(1)//mmu-miR-181d-5p(1)	mmu-miR-181c(1)//mmu-miR-181d(1)	miR-181c-5p(1)//miR-181d-5p(1)	miR-181c-5p(1)//miR-181d-5p(1)	1	NA	NA	NA	NA	0	1
NCOA2	mmu-miR-181c-5p(1)//mmu-miR-181d-5p(1)	mmu-miR-181c(1)//mmu-miR-181d(1)	mmu-miR-181c-5p(1)//mmu-miR-181d-5p(1)	mmu-miR-181c(1)//mmu-miR-181d(1)	miR-181c-5p(1)//miR-181d-5p(1)	miR-181c-5p(1)//miR-181d-5p(1)	1	NA	NA	NA	NA	0	1
NEK7	mmu-miR-181c-5p(2)//mmu-miR-181d-5p(2)	mmu-miR-181c(2)//mmu-miR-181d(2)	mmu-miR-181c-5p(1)//mmu-miR-181d-5p(1)	mmu-miR-181c(1)//mmu-miR-181d(1)	miR-181c-5p(1)//miR-181d-5p(1)	miR-181c-5p(1)//miR-181d-5p(1)	1	NA	NA	NA	NA	0	1
NOTCH2	mmu-miR-181c-5p(1)//mmu-miR-181d-5p(1)	mmu-miR-181c(1)//mmu-miR-181d(1)	mmu-miR-181c-5p(1)//mmu-miR-181d-5p(1)	mmu-miR-181c(1)//mmu-miR-181d(1)	miR-181c-5p(1)//miR-181d-5p(1)	miR-181c-5p(1)//miR-181d-5p(1)	1	NA	NA	NA	NA	0	1
NPTN	mmu-miR-181c-5p(1)//mmu-miR-181d-5p(1)	mmu-miR-181c(2)//mmu-miR-181d(2)	mmu-miR-181c-5p(1)//mmu-miR-181d-5p(1)	mmu-miR-181c(1)//mmu-miR-181d(1)	miR-181c-5p(1)//miR-181d-5p(1)	miR-181c-5p(1)//miR-181d-5p(1)	1	NA	NA	NA	NA	0	1
NR3C1	mmu-miR-181c-5p(1)//mmu-miR-181d-5p(1)	mmu-miR-181c(2)//mmu-miR-181d(4)	mmu-miR-181c-5p(1)//mmu-miR-181d-5p(1)	mmu-miR-181c(3)//mmu-miR-181d(3)	miR-181c-5p(1)//miR-181d-5p(1)	miR-181c-5p(1)//miR-181d-5p(1)	1	NA	NA	NA	NA	0	1
OGT	mmu-miR-181c-5p(1)//mmu-miR-181d-5p(1)	mmu-miR-181c(2)//mmu-miR-181d(1)	mmu-miR-181c-5p(1)//mmu-miR-181d-5p(1)	mmu-miR-181c(1)//mmu-miR-181d(1)	miR-181c-5p(1)//miR-181d-5p(1)	miR-181c-5p(1)//miR-181d-5p(1)	1	NA	NA	NA	NA	0	1
OSBPL8	mmu-miR-181c-5p(1)//mmu-miR-181d-5p(1)	mmu-miR-181c(2)//mmu-miR-181d(4)	mmu-miR-181c-5p(1)//mmu-miR-181d-5p(1)	mmu-miR-181c(1)//mmu-miR-181d(1)	miR-181c-5p(1)//miR-181d-5p(1)	miR-181c-5p(1)//miR-181d-5p(1)	1	NA	NA	NA	NA	0	1
OTUD4	mmu-miR-181c-5p(1)//mmu-miR-181d-5p(1)	mmu-miR-181c(2)//mmu-miR-181d(1)	mmu-miR-181c-5p(1)//mmu-miR-181d-5p(1)	mmu-miR-181c(1)//mmu-miR-181d(1)	miR-181c-5p(1)//miR-181d-5p(1)	miR-181c-5p(1)//miR-181d-5p(1)	1	NA	NA	NA	NA	0	1
PAFAH1B2	mmu-miR-181c-5p(1)//mmu-miR-181d-5p(1)	mmu-miR-181c(1)//mmu-miR-181d(1)	mmu-miR-181c-5p(1)//mmu-miR-181d-5p(1)	mmu-miR-181c(1)//mmu-miR-181d(1)	miR-181c-5p(1)//miR-181d-5p(1)	miR-181c-5p(1)//miR-181d-5p(1)	1	NA	NA	NA	NA	0	1
PIK3R3	mmu-miR-181c-5p(2)//mmu-miR-181d-5p(2)	mmu-miR-181c(2)//mmu-miR-181d(2)	mmu-miR-181c-5p(1)//mmu-miR-181d-5p(1)	mmu-miR-181c(2)//mmu-miR-181d(2)	miR-181c-5p(1)//miR-181d-5p(1)	miR-181c-5p(1)//miR-181d-5p(1)	1	NA	NA	NA	NA	0	1
PPP1CB	mmu-miR-181c-5p(1)//mmu-miR-181d-5p(1)	mmu-miR-181c(1)//mmu-miR-181d(2)	mmu-miR-181c-5p(1)//mmu-miR-181d-5p(1)	mmu-miR-181c(1)//mmu-miR-181d(1)	miR-181c-5p(1)//miR-181d-5p(1)	miR-181c-5p(1)//miR-181d-5p(1)	1	NA	NA	NA	NA	0	1
PRKCD	mmu-miR-181c-5p(1)//mmu-miR-181d-5p(1)	mmu-miR-181c(1)//mmu-miR-181d(1)	mmu-miR-181c-5p(1)//mmu-miR-181d-5p(1)	mmu-miR-181c(1)//mmu-miR-181d(1)	miR-181c-5p(1)//miR-181d-5p(1)	miR-181c-5p(1)//miR-181d-5p(1)	1	NA	NA	NA	NA	0	1
PRTG	mmu-miR-181c-5p(2)//mmu-miR-181d-5p(2)	mmu-miR-181c(3)//mmu-miR-181d(2)	mmu-miR-181c-5p(1)//mmu-miR-181d-5p(1)	mmu-miR-181c(3)//mmu-miR-181d(3)	miR-181c-5p(1)//miR-181d-5p(1)	miR-181c-5p(1)//miR-181d-5p(1)	1	NA	NA	NA	NA	0	1
RAD21	mmu-miR-181c-5p(1)//mmu-miR-181d-5p(1)	mmu-miR-181c(1)//mmu-miR-181d(1)	mmu-miR-181c-5p(1)//mmu-miR-181d-5p(1)	mmu-miR-181c(1)//mmu-miR-181d(1)	miR-181c-5p(1)//miR-181d-5p(1)	miR-181c-5p(1)//miR-181d-5p(1)	1	NA	NA	NA	NA	0	1
RAN	mmu-miR-181c-5p(1)//mmu-miR-181d-5p(1)	mmu-miR-181c(1)//mmu-miR-181d(1)	mmu-miR-181c-5p(1)//mmu-miR-181d-5p(1)	mmu-miR-181c(1)//mmu-miR-181d(1)	miR-181c-5p(1)//miR-181d-5p(1)	miR-181c-5p(1)//miR-181d-5p(1)	1	NA	NA	NA	NA	0	1
RAP1B	mmu-miR-181c-5p(2)//mmu-miR-181d-5p(2)	mmu-miR-181c(3)//mmu-miR-181d(2)	mmu-miR-181c-5p(1)//mmu-miR-181d-5p(1)	mmu-miR-181c(1)//mmu-miR-181d(1)	miR-181c-5p(1)//miR-181d-5p(1)	miR-181c-5p(1)//miR-181d-5p(1)	1	NA	NA	NA	NA	0	1
RBM26	mmu-miR-181c-5p(1)//mmu-miR-181d-5p(1)	mmu-miR-181c(3)//mmu-miR-181d(3)	mmu-miR-181c-5p(1)//mmu-miR-181d-5p(1)	mmu-miR-181c(1)//mmu-miR-181d(1)	miR-181c-5p(1)//miR-181d-5p(1)	miR-181c-5p(1)//miR-181d-5p(1)	1	NA	NA	NA	NA	0	1
RECK	mmu-miR-181c-5p(1)//mmu-miR-181d-5p(1)	mmu-miR-181c(2)//mmu-miR-181d(2)	mmu-miR-181c-5p(1)//mmu-miR-181d-5p(1)	mmu-miR-181c(1)//mmu-miR-181d(1)	miR-181c-5p(1)//miR-181d-5p(1)	miR-181c-5p(1)//miR-181d-5p(1)	1	NA	NA	NA	NA	0	1
RLF	mmu-miR-181c-5p(2)//mmu-miR-181d-5p(2)	mmu-miR-181c(2)//mmu-miR-181d(2)	mmu-miR-181c-5p(1)//mmu-miR-181d-5p(1)	mmu-miR-181c(2)//mmu-miR-181d(2)	miR-181c-5p(1)//miR-181d-5p(1)	miR-181c-5p(1)//miR-181d-5p(1)	1	NA	NA	NA	NA	0	1
RRAS2	mmu-miR-181c-5p(1)//mmu-miR-181d-5p(1)	mmu-miR-181c(1)//mmu-miR-181d(1)	mmu-miR-181c-5p(1)//mmu-miR-181d-5p(1)	mmu-miR-181c(1)//mmu-miR-181d(1)	miR-181c-5p(1)//miR-181d-5p(1)	miR-181c-5p(1)//miR-181d-5p(1)	1	NA	NA	NA	NA	0	1
SEC24A	mmu-miR-181c-5p(1)//mmu-miR-181d-5p(1)	mmu-miR-181c(1)//mmu-miR-181d(2)	mmu-miR-181c-5p(1)//mmu-miR-181d-5p(1)	mmu-miR-181c(1)//mmu-miR-181d(1)	miR-181c-5p(1)//miR-181d-5p(1)	miR-181c-5p(1)//miR-181d-5p(1)	1	NA	NA	NA	NA	0	1
SLC38A2	mmu-miR-181c-5p(1)//mmu-miR-181d-5p(1)	mmu-miR-181c(1)//mmu-miR-181d(1)	mmu-miR-181c-5p(1)//mmu-miR-181d-5p(1)	mmu-miR-181c(1)//mmu-miR-181d(1)	miR-181c-5p(1)//miR-181d-5p(1)	miR-181c-5p(1)//miR-181d-5p(1)	1	NA	NA	NA	NA	0	1
SLMAP	mmu-miR-181c-5p(2)//mmu-miR-181d-5p(2)	mmu-miR-181c(4)//mmu-miR-181d(4)	mmu-miR-181c-5p(1)//mmu-miR-181d-5p(1)	mmu-miR-181c(1)//mmu-miR-181d(1)	miR-181c-5p(1)//miR-181d-5p(1)	miR-181c-5p(1)//miR-181d-5p(1)	1	NA	NA	NA	NA	0	1
SMAD7	mmu-miR-181c-5p(1)//mmu-miR-181d-5p(1)	mmu-miR-181c(1)//mmu-miR-181d(1)	mmu-miR-181c-5p(1)//mmu-miR-181d-5p(1)	mmu-miR-181c(1)//mmu-miR-181d(1)	miR-181c-5p(1)//miR-181d-5p(1)	miR-181c-5p(1)//miR-181d-5p(1)	1	NA	NA	NA	NA	0	1
SPAG9	mmu-miR-181c-5p(1)//mmu-miR-181d-5p(1)	mmu-miR-181c(1)//mmu-miR-181d(1)	mmu-miR-181c-5p(1)//mmu-miR-181d-5p(1)	mmu-miR-181c(1)//mmu-miR-181d(1)	miR-181c-5p(1)//miR-181d-5p(1)	miR-181c-5p(1)//miR-181d-5p(1)	1	NA	NA	NA	NA	0	1
SRPK2	mmu-miR-181c-5p(2)//mmu-miR-181d-5p(2)	mmu-miR-181c(2)//mmu-miR-181d(2)	mmu-miR-181c-5p(1)//mmu-miR-181d-5p(1)	mmu-miR-181c(1)//mmu-miR-181d(1)	miR-181c-5p(1)//miR-181d-5p(1)	miR-181c-5p(1)//miR-181d-5p(1)	1	NA	NA	NA	NA	0	1
SSX2IP	mmu-miR-181c-5p(1)//mmu-miR-181d-5p(1)	mmu-miR-181c(4)//mmu-miR-181d(4)	mmu-miR-181c-5p(1)//mmu-miR-181d-5p(1)	mmu-miR-181c(1)//mmu-miR-181d(1)	miR-181c-5p(1)//miR-181d-5p(1)	miR-181c-5p(1)//miR-181d-5p(1)	1	NA	NA	NA	NA	0	1
ST8SIA4	mmu-miR-181c-5p(1)//mmu-miR-181d-5p(1)	mmu-miR-181c(1)//mmu-miR-181d(1)	mmu-miR-181c-5p(1)//mmu-miR-181d-5p(1)	mmu-miR-181c(1)//mmu-miR-181d(1)	miR-181c-5p(1)//miR-181d-5p(1)	miR-181c-5p(1)//miR-181d-5p(1)	1	NA	NA	NA	NA	0	1
TARDBP	mmu-miR-181c-5p(1)//mmu-miR-181d-5p(1)	mmu-miR-181c(3)//mmu-miR-181d(3)	mmu-miR-181c-5p(1)//mmu-miR-181d-5p(1)	mmu-miR-181c(1)//mmu-miR-181d(1)	miR-181c-5p(1)//miR-181d-5p(1)	miR-181c-5p(1)//miR-181d-5p(1)	1	NA	NA	NA	NA	0	1
TBL1XR1	mmu-miR-181c-5p(1)//mmu-miR-181d-5p(1)	mmu-miR-181c(1)//mmu-miR-181d(1)	mmu-miR-181c-5p(1)//mmu-miR-181d-5p(1)	mmu-miR-181c(1)//mmu-miR-181d(1)	miR-181c-5p(1)//miR-181d-5p(1)	miR-181c-5p(1)//miR-181d-5p(1)	1	NA	NA	NA	NA	0	1
THOC2	mmu-miR-181c-5p(1)//mmu-miR-181d-5p(1)	mmu-miR-181c(3)//mmu-miR-181d(3)	mmu-miR-181c-5p(1)//mmu-miR-181d-5p(1)	mmu-miR-181c(2)//mmu-miR-181d(2)	miR-181c-5p(1)//miR-181d-5p(1)	miR-181c-5p(1)//miR-181d-5p(1)	1	NA	NA	NA	NA	0	1
TM9SF3	mmu-miR-181c-5p(1)//mmu-miR-181d-5p(1)	mmu-miR-181c(1)//mmu-miR-181d(1)	mmu-miR-181c-5p(1)//mmu-miR-181d-5p(1)	mmu-miR-181c(1)//mmu-miR-181d(1)	miR-181c-5p(1)//miR-181d-5p(1)	miR-181c-5p(1)//miR-181d-5p(1)	1	NA	NA	NA	NA	0	1
TNPO1	mmu-miR-181c-5p(4)//mmu-miR-181d-5p(4)	mmu-miR-181c(1)//mmu-miR-181d(2)	mmu-miR-181c-5p(1)//mmu-miR-181d-5p(1)	mmu-miR-181c(1)//mmu-miR-181d(1)	miR-181c-5p(1)//miR-181d-5p(1)	miR-181c-5p(1)//miR-181d-5p(1)	1	NA	NA	NA	NA	0	1
TSC22D2	mmu-miR-181c-5p(1)//mmu-miR-181d-5p(1)	mmu-miR-181c(2)//mmu-miR-181d(2)	mmu-miR-181c-5p(1)//mmu-miR-181d-5p(1)	mmu-miR-181c(1)//mmu-miR-181d(1)	miR-181c-5p(1)//miR-181d-5p(1)	miR-181c-5p(1)//miR-181d-5p(1)	1	NA	NA	NA	NA	0	1
UBE2B	mmu-miR-181c-5p(1)//mmu-miR-181d-5p(1)	mmu-miR-181c(2)//mmu-miR-181d(2)	mmu-miR-181c-5p(1)//mmu-miR-181d-5p(1)	mmu-miR-181c(1)//mmu-miR-181d(1)	miR-181c-5p(1)//miR-181d-5p(1)	miR-181c-5p(1)//miR-181d-5p(1)	1	NA	NA	NA	NA	0	1
UBE3C	mmu-miR-181c-5p(1)//mmu-miR-181d-5p(1)	mmu-miR-181c(3)//mmu-miR-181d(3)	mmu-miR-181c-5p(1)//mmu-miR-181d-5p(1)	mmu-miR-181c(1)//mmu-miR-181d(1)	miR-181c-5p(1)//miR-181d-5p(1)	miR-181c-5p(1)//miR-181d-5p(1)	1	NA	NA	NA	NA	0	1
WASL	mmu-miR-181c-5p(1)//mmu-miR-181d-5p(1)	mmu-miR-181c(1)//mmu-miR-181d(1)	mmu-miR-181c-5p(1)//mmu-miR-181d-5p(1)	mmu-miR-181c(1)//mmu-miR-181d(1)	miR-181c-5p(1)//miR-181d-5p(1)	miR-181c-5p(1)//miR-181d-5p(1)	1	NA	NA	NA	NA	0	1
WDR37	mmu-miR-181c-5p(1)//mmu-miR-181d-5p(1)	mmu-miR-181c(2)//mmu-miR-181d(2)	mmu-miR-181c-5p(1)//mmu-miR-181d-5p(1)	mmu-miR-181c(1)//mmu-miR-181d(1)	miR-181c-5p(1)//miR-181d-5p(1)	miR-181c-5p(1)//miR-181d-5p(1)	1	NA	NA	NA	NA	0	1
WDR82	mmu-miR-181c-5p(1)//mmu-miR-181d-5p(1)	mmu-miR-181c(1)//mmu-miR-181d(1)	mmu-miR-181c-5p(1)//mmu-miR-181d-5p(1)	mmu-miR-181c(1)//mmu-miR-181d(1)	miR-181c-5p(1)//miR-181d-5p(1)	miR-181c-5p(1)//miR-181d-5p(1)	1	NA	NA	NA	NA	0	1
WNK1	mmu-miR-181c-5p(1)//mmu-miR-181d-5p(1)	mmu-miR-181c(1)//mmu-miR-181d(3)	mmu-miR-181c-5p(1)//mmu-miR-181d-5p(1)	mmu-miR-181c(1)//mmu-miR-181d(1)	miR-181c-5p(1)//miR-181d-5p(1)	miR-181c-5p(1)//miR-181d-5p(1)	1	NA	NA	NA	NA	0	1
WWC2	mmu-miR-181c-5p(1)//mmu-miR-181d-5p(1)	mmu-miR-181c(1)//mmu-miR-181d(1)	mmu-miR-181c-5p(1)//mmu-miR-181d-5p(1)	mmu-miR-181c(1)//mmu-miR-181d(1)	miR-181c-5p(1)//miR-181d-5p(1)	miR-181c-5p(1)//miR-181d-5p(1)	1	NA	NA	NA	NA	0	1
YTHDF3	mmu-miR-181c-5p(1)//mmu-miR-181d-5p(1)	mmu-miR-181c(4)//mmu-miR-181d(4)	mmu-miR-181c-5p(1)//mmu-miR-181d-5p(1)	mmu-miR-181c(4)//mmu-miR-181d(4)	miR-181c-5p(1)//miR-181d-5p(1)	miR-181c-5p(1)//miR-181d-5p(1)	1	NA	NA	NA	NA	0	1
YWHAG	mmu-miR-181c-5p(1)//mmu-miR-181d-5p(1)	mmu-miR-181c(1)//mmu-miR-181d(1)	mmu-miR-181c-5p(1)//mmu-miR-181d-5p(1)	mmu-miR-181c(1)//mmu-miR-181d(1)	miR-181c-5p(1)//miR-181d-5p(1)	miR-181c-5p(1)//miR-181d-5p(1)	1	NA	NA	NA	NA	0	1
ZBTB4	mmu-miR-181c-5p(1)//mmu-miR-181d-5p(1)	mmu-miR-181c(4)//mmu-miR-181d(4)	mmu-miR-181c-5p(1)//mmu-miR-181d-5p(1)	mmu-miR-181c(3)//mmu-miR-181d(3)	miR-181c-5p(1)//miR-181d-5p(1)	miR-181c-5p(1)//miR-181d-5p(1)	1	NA	NA	NA	NA	0	1
ZDHHC3	mmu-miR-181c-5p(1)//mmu-miR-181d-5p(1)	mmu-miR-181c(1)//mmu-miR-181d(1)	mmu-miR-181c-5p(1)//mmu-miR-181d-5p(1)	mmu-miR-181c(1)//mmu-miR-181d(1)	miR-181c-5p(1)//miR-181d-5p(1)	miR-181c-5p(1)//miR-181d-5p(1)	1	NA	NA	NA	NA	0	1
ZFAND6	mmu-miR-181c-5p(1)//mmu-miR-181d-5p(1)	mmu-miR-181c(1)//mmu-miR-181d(1)	mmu-miR-181c-5p(1)//mmu-miR-181d-5p(1)	mmu-miR-181c(1)//mmu-miR-181d(1)	miR-181c-5p(1)//miR-181d-5p(1)	miR-181c-5p(1)//miR-181d-5p(1)	1	NA	NA	NA	NA	0	1
ZFP36L1	mmu-miR-181c-5p(2)//mmu-miR-181d-5p(2)	mmu-miR-181c(1)//mmu-miR-181d(1)	mmu-miR-181c-5p(1)//mmu-miR-181d-5p(1)	mmu-miR-181c(1)//mmu-miR-181d(1)	miR-181c-5p(1)//miR-181d-5p(1)	miR-181c-5p(1)//miR-181d-5p(1)	1	NA	NA	NA	NA	0	1
ZFP36L2	mmu-miR-181c-5p(3)//mmu-miR-181d-5p(3)	mmu-miR-181c(3)//mmu-miR-181d(3)	mmu-miR-181c-5p(1)//mmu-miR-181d-5p(1)	mmu-miR-181c(2)//mmu-miR-181d(2)	miR-181c-5p(1)//miR-181d-5p(1)	miR-181c-5p(1)//miR-181d-5p(1)	1	NA	NA	NA	NA	0	1
QSER1	mmu-miR-181c-5p(1)//mmu-miR-181d-5p(1)	mmu-miR-181d(1)	mmu-miR-181c-5p(1)//mmu-miR-181d-5p(1)	mmu-miR-181c(1)//mmu-miR-181d(1)	miR-181c-5p(1)//miR-181d-5p(1)	miR-181c-5p(1)//miR-181d-5p(1)	0.925	NA	NA	NA	NA	0	0.925
ANKRD13C	mmu-miR-181c-5p(1)//mmu-miR-181d-5p(1)	mmu-miR-181c(3)//mmu-miR-181d(3)	mmu-miR-181c-5p(1)//mmu-miR-181d-5p(1)	mmu-miR-181c(1)//mmu-miR-181d(1)	miR-181c-5p(1)	miR-181c-5p(1)//miR-181d-5p(1)	0.9	NA	NA	NA	NA	0	0.9
ARNT2	mmu-miR-181c-5p(1)//mmu-miR-181d-5p(1)	mmu-miR-181c(1)//mmu-miR-181d(1)	mmu-miR-181c-5p(1)//mmu-miR-181d-5p(1)	mmu-miR-181c(1)//mmu-miR-181d(1)	miR-181d-5p(1)	miR-181c-5p(1)//miR-181d-5p(1)	0.9	NA	NA	NA	NA	0	0.9
ARSJ	mmu-miR-181c-5p(1)//mmu-miR-181d-5p(1)	mmu-miR-181c(1)//mmu-miR-181d(1)	mmu-miR-181c-5p(1)//mmu-miR-181d-5p(1)	mmu-miR-181c(1)//mmu-miR-181d(1)	miR-181c-5p(1)	miR-181c-5p(1)//miR-181d-5p(1)	0.9	NA	NA	NA	NA	0	0.9
ATF2	mmu-miR-181c-5p(1)//mmu-miR-181d-5p(1)	mmu-miR-181c(1)//mmu-miR-181d(2)	mmu-miR-181c-5p(1)//mmu-miR-181d-5p(1)	mmu-miR-181c(1)//mmu-miR-181d(1)	miR-181c-5p(1)	miR-181c-5p(1)//miR-181d-5p(1)	0.9	NA	NA	NA	NA	0	0.9
CARM1	mmu-miR-181c-5p(1)//mmu-miR-181d-5p(1)	mmu-miR-181c(1)//mmu-miR-181d(1)	mmu-miR-181c-5p(1)//mmu-miR-181d-5p(1)	mmu-miR-181c(1)//mmu-miR-181d(1)	miR-181c-5p(1)	miR-181c-5p(1)//miR-181d-5p(1)	0.9	NA	NA	NA	NA	0	0.9
CLASP1	mmu-miR-181c-5p(1)//mmu-miR-181d-5p(1)	mmu-miR-181c(2)//mmu-miR-181d(3)	mmu-miR-181c-5p(1)//mmu-miR-181d-5p(1)	mmu-miR-181c(1)//mmu-miR-181d(1)	miR-181c-5p(1)	miR-181c-5p(1)//miR-181d-5p(1)	0.9	NA	NA	NA	NA	0	0.9
CPD	mmu-miR-181c-5p(3)//mmu-miR-181d-5p(3)	mmu-miR-181c(3)//mmu-miR-181d(3)	mmu-miR-181c-5p(1)//mmu-miR-181d-5p(1)	mmu-miR-181c(3)//mmu-miR-181d(3)	miR-181c-5p(1)	miR-181c-5p(1)//miR-181d-5p(1)	0.9	NA	NA	NA	NA	0	0.9
DIP2C	mmu-miR-181c-5p(1)//mmu-miR-181d-5p(1)	mmu-miR-181c(1)//mmu-miR-181d(1)	mmu-miR-181c-5p(1)//mmu-miR-181d-5p(1)	mmu-miR-181c(1)//mmu-miR-181d(1)	miR-181c-5p(1)	miR-181c-5p(1)//miR-181d-5p(1)	0.9	NA	NA	NA	NA	0	0.9
FNDC3B	mmu-miR-181c-5p(1)//mmu-miR-181d-5p(1)	mmu-miR-181c(4)//mmu-miR-181d(2)	mmu-miR-181c-5p(1)//mmu-miR-181d-5p(1)	mmu-miR-181c(1)//mmu-miR-181d(1)	miR-181c-5p(1)	miR-181c-5p(1)//miR-181d-5p(1)	0.9	NA	NA	NA	NA	0	0.9
FOXK1	mmu-miR-181c-5p(1)//mmu-miR-181d-5p(1)	mmu-miR-181c(1)//mmu-miR-181d(1)	mmu-miR-181c-5p(1)//mmu-miR-181d-5p(1)	mmu-miR-181c(1)//mmu-miR-181d(1)	miR-181d-5p(1)	miR-181c-5p(1)//miR-181d-5p(1)	0.9	NA	NA	NA	NA	0	0.9
GATA6	mmu-miR-181c-5p(1)//mmu-miR-181d-5p(1)	mmu-miR-181c(1)//mmu-miR-181d(1)	mmu-miR-181c-5p(1)//mmu-miR-181d-5p(1)	mmu-miR-181c(1)//mmu-miR-181d(1)	miR-181c-5p(1)	miR-181c-5p(1)//miR-181d-5p(1)	0.9	NA	NA	NA	NA	0	0.9
GNAQ	mmu-miR-181c-5p(3)//mmu-miR-181d-5p(3)	mmu-miR-181c(1)//mmu-miR-181d(1)	mmu-miR-181c-5p(1)//mmu-miR-181d-5p(1)	mmu-miR-181c(2)//mmu-miR-181d(2)	miR-181d-5p(1)	miR-181c-5p(1)//miR-181d-5p(1)	0.9	NA	NA	NA	NA	0	0.9
HOXA11	mmu-miR-181c-5p(1)//mmu-miR-181d-5p(1)	mmu-miR-181c(1)//mmu-miR-181d(1)	mmu-miR-181c-5p(1)//mmu-miR-181d-5p(1)	mmu-miR-181c(1)//mmu-miR-181d(1)	miR-181c-5p(1)	miR-181c-5p(1)//miR-181d-5p(1)	0.9	NA	NA	NA	NA	0	0.9
JARID2	mmu-miR-181c-5p(1)//mmu-miR-181d-5p(1)	mmu-miR-181c(1)//mmu-miR-181d(1)	mmu-miR-181c-5p(1)//mmu-miR-181d-5p(1)	mmu-miR-181c(1)//mmu-miR-181d(1)	miR-181c-5p(1)	miR-181c-5p(1)//miR-181d-5p(1)	0.9	NA	NA	NA	NA	0	0.9
KLF15	mmu-miR-181c-5p(1)//mmu-miR-181d-5p(1)	mmu-miR-181c(1)//mmu-miR-181d(1)	mmu-miR-181c-5p(1)//mmu-miR-181d-5p(1)	mmu-miR-181c(1)//mmu-miR-181d(1)	miR-181c-5p(1)	miR-181c-5p(1)//miR-181d-5p(1)	0.9	NA	NA	NA	NA	0	0.9
KPNB1	mmu-miR-181c-5p(1)//mmu-miR-181d-5p(1)	mmu-miR-181c(1)//mmu-miR-181d(1)	mmu-miR-181c-5p(1)//mmu-miR-181d-5p(1)	mmu-miR-181c(1)//mmu-miR-181d(1)	miR-181c-5p(1)	miR-181c-5p(1)//miR-181d-5p(1)	0.9	NA	NA	NA	NA	0	0.9
LIN7C	mmu-miR-181c-5p(1)//mmu-miR-181d-5p(1)	mmu-miR-181c(1)//mmu-miR-181d(1)	mmu-miR-181c-5p(1)//mmu-miR-181d-5p(1)	mmu-miR-181c(1)//mmu-miR-181d(1)	miR-181c-5p(1)	miR-181c-5p(1)//miR-181d-5p(1)	0.9	NA	NA	NA	NA	0	0.9
MAPK1	mmu-miR-181c-5p(1)//mmu-miR-181d-5p(1)	mmu-miR-181c(2)//mmu-miR-181d(2)	mmu-miR-181c-5p(1)//mmu-miR-181d-5p(1)	mmu-miR-181c(1)//mmu-miR-181d(1)	miR-181d-5p(1)	miR-181c-5p(1)//miR-181d-5p(1)	0.9	NA	NA	NA	NA	0	0.9
MAT2A	mmu-miR-181c-5p(1)//mmu-miR-181d-5p(1)	mmu-miR-181c(2)//mmu-miR-181d(2)	mmu-miR-181c-5p(1)//mmu-miR-181d-5p(1)	mmu-miR-181c(1)//mmu-miR-181d(1)	miR-181c-5p(1)	miR-181c-5p(1)//miR-181d-5p(1)	0.9	NA	NA	NA	NA	0	0.9
MED26	mmu-miR-181c-5p(1)//mmu-miR-181d-5p(1)	mmu-miR-181c(1)//mmu-miR-181d(1)	mmu-miR-181c-5p(1)//mmu-miR-181d-5p(1)	mmu-miR-181c(1)//mmu-miR-181d(1)	miR-181c-5p(1)	miR-181c-5p(1)//miR-181d-5p(1)	0.9	NA	NA	NA	NA	0	0.9
MIER3	mmu-miR-181c-5p(1)//mmu-miR-181d-5p(1)	mmu-miR-181c(1)//mmu-miR-181d(1)	mmu-miR-181c-5p(1)//mmu-miR-181d-5p(1)	mmu-miR-181c(1)//mmu-miR-181d(1)	miR-181c-5p(1)	miR-181c-5p(1)//miR-181d-5p(1)	0.9	NA	NA	NA	NA	0	0.9
MINK1	mmu-miR-181c-5p(1)//mmu-miR-181d-5p(1)	mmu-miR-181c(1)//mmu-miR-181d(1)	mmu-miR-181c-5p(1)//mmu-miR-181d-5p(1)	mmu-miR-181c(1)//mmu-miR-181d(1)	miR-181c-5p(1)	miR-181c-5p(1)//miR-181d-5p(1)	0.9	NA	NA	NA	NA	0	0.9
MYBL1	mmu-miR-181c-5p(1)//mmu-miR-181d-5p(1)	mmu-miR-181c(1)//mmu-miR-181d(1)	mmu-miR-181c-5p(1)//mmu-miR-181d-5p(1)	mmu-miR-181c(1)//mmu-miR-181d(1)	miR-181c-5p(1)	miR-181c-5p(1)//miR-181d-5p(1)	0.9	NA	NA	NA	NA	0	0.9
MYH10	mmu-miR-181c-5p(1)//mmu-miR-181d-5p(1)	mmu-miR-181c(2)//mmu-miR-181d(3)	mmu-miR-181c-5p(1)//mmu-miR-181d-5p(1)	mmu-miR-181c(1)//mmu-miR-181d(1)	miR-181c-5p(1)	miR-181c-5p(1)//miR-181d-5p(1)	0.9	NA	NA	NA	NA	0	0.9
NEO1	mmu-miR-181c-5p(1)//mmu-miR-181d-5p(1)	mmu-miR-181c(2)//mmu-miR-181d(1)	mmu-miR-181c-5p(1)//mmu-miR-181d-5p(1)	mmu-miR-181c(1)//mmu-miR-181d(1)	miR-181c-5p(1)	miR-181c-5p(1)//miR-181d-5p(1)	0.9	NA	NA	NA	NA	0	0.9
NFAT5	mmu-miR-181c-5p(1)//mmu-miR-181d-5p(1)	mmu-miR-181c(1)//mmu-miR-181d(1)	mmu-miR-181c-5p(1)//mmu-miR-181d-5p(1)	mmu-miR-181c(1)//mmu-miR-181d(1)	miR-181c-5p(1)	miR-181c-5p(1)//miR-181d-5p(1)	0.9	NA	NA	NA	NA	0	0.9
OSBPL3	mmu-miR-181c-5p(2)//mmu-miR-181d-5p(2)	mmu-miR-181c(1)//mmu-miR-181d(1)	mmu-miR-181c-5p(1)//mmu-miR-181d-5p(1)	mmu-miR-181c(1)//mmu-miR-181d(1)	miR-181c-5p(1)	miR-181c-5p(1)//miR-181d-5p(1)	0.9	NA	NA	NA	NA	0	0.9
PAPOLG	mmu-miR-181c-5p(1)//mmu-miR-181d-5p(1)	mmu-miR-181c(2)//mmu-miR-181d(2)	mmu-miR-181c-5p(1)//mmu-miR-181d-5p(1)	mmu-miR-181c(1)//mmu-miR-181d(1)	miR-181d-5p(1)	miR-181c-5p(1)//miR-181d-5p(1)	0.9	NA	NA	NA	NA	0	0.9
PAWR	mmu-miR-181c-5p(1)//mmu-miR-181d-5p(1)	mmu-miR-181c(1)//mmu-miR-181d(1)	mmu-miR-181c-5p(1)//mmu-miR-181d-5p(1)	mmu-miR-181c(1)//mmu-miR-181d(1)	miR-181c-5p(1)	miR-181c-5p(1)//miR-181d-5p(1)	0.9	NA	NA	NA	NA	0	0.9
PHTF2	mmu-miR-181c-5p(2)//mmu-miR-181d-5p(2)	mmu-miR-181c(2)//mmu-miR-181d(3)	mmu-miR-181c-5p(1)//mmu-miR-181d-5p(1)	mmu-miR-181c(1)//mmu-miR-181d(1)	miR-181c-5p(1)	miR-181c-5p(1)//miR-181d-5p(1)	0.9	NA	NA	NA	NA	0	0.9
PICALM	mmu-miR-181c-5p(1)//mmu-miR-181d-5p(1)	mmu-miR-181c(1)//mmu-miR-181d(1)	mmu-miR-181c-5p(1)//mmu-miR-181d-5p(1)	mmu-miR-181c(1)//mmu-miR-181d(1)	miR-181d-5p(1)	miR-181c-5p(1)//miR-181d-5p(1)	0.9	NA	NA	NA	NA	0	0.9
PLCL2	mmu-miR-181c-5p(1)//mmu-miR-181d-5p(1)	mmu-miR-181c(2)//mmu-miR-181d(2)	mmu-miR-181c-5p(1)//mmu-miR-181d-5p(1)	mmu-miR-181c(1)//mmu-miR-181d(1)	miR-181c-5p(1)	miR-181c-5p(1)//miR-181d-5p(1)	0.9	NA	NA	NA	NA	0	0.9
PLEKHA3	mmu-miR-181c-5p(1)//mmu-miR-181d-5p(1)	mmu-miR-181c(1)//mmu-miR-181d(1)	mmu-miR-181c-5p(1)//mmu-miR-181d-5p(1)	mmu-miR-181c(1)//mmu-miR-181d(1)	miR-181d-5p(1)	miR-181c-5p(1)//miR-181d-5p(1)	0.9	NA	NA	NA	NA	0	0.9
PNRC2	mmu-miR-181c-5p(1)//mmu-miR-181d-5p(1)	mmu-miR-181c(1)//mmu-miR-181d(2)	mmu-miR-181c-5p(1)//mmu-miR-181d-5p(1)	mmu-miR-181c(1)//mmu-miR-181d(1)	miR-181d-5p(1)	miR-181c-5p(1)//miR-181d-5p(1)	0.9	NA	NA	NA	NA	0	0.9
PPP3R1	mmu-miR-181c-5p(1)//mmu-miR-181d-5p(1)	mmu-miR-181c(1)//mmu-miR-181d(1)	mmu-miR-181c-5p(1)//mmu-miR-181d-5p(1)	mmu-miR-181c(1)//mmu-miR-181d(1)	miR-181c-5p(1)	miR-181c-5p(1)//miR-181d-5p(1)	0.9	NA	NA	NA	NA	0	0.9
PTEN	mmu-miR-181c-5p(1)//mmu-miR-181d-5p(1)	mmu-miR-181c(2)//mmu-miR-181d(3)	mmu-miR-181c-5p(1)//mmu-miR-181d-5p(1)	mmu-miR-181c(1)//mmu-miR-181d(1)	miR-181c-5p(1)	miR-181c-5p(1)//miR-181d-5p(1)	0.9	NA	NA	NA	NA	0	0.9
SEC24C	mmu-miR-181c-5p(1)//mmu-miR-181d-5p(1)	mmu-miR-181c(1)//mmu-miR-181d(1)	mmu-miR-181c-5p(1)//mmu-miR-181d-5p(1)	mmu-miR-181c(1)//mmu-miR-181d(1)	miR-181c-5p(1)	miR-181c-5p(1)//miR-181d-5p(1)	0.9	NA	NA	NA	NA	0	0.9
SEL1L	mmu-miR-181c-5p(1)//mmu-miR-181d-5p(1)	mmu-miR-181c(1)//mmu-miR-181d(2)	mmu-miR-181c-5p(1)//mmu-miR-181d-5p(1)	mmu-miR-181c(1)//mmu-miR-181d(1)	miR-181c-5p(1)	miR-181c-5p(1)//miR-181d-5p(1)	0.9	NA	NA	NA	NA	0	0.9
SIRT1	mmu-miR-181c-5p(1)//mmu-miR-181d-5p(1)	mmu-miR-181c(2)//mmu-miR-181d(3)	mmu-miR-181c-5p(1)//mmu-miR-181d-5p(1)	mmu-miR-181c(1)//mmu-miR-181d(1)	miR-181c-5p(1)	miR-181c-5p(1)//miR-181d-5p(1)	0.9	NA	NA	NA	NA	0	0.9
SPIRE1	mmu-miR-181c-5p(1)//mmu-miR-181d-5p(1)	mmu-miR-181c(2)//mmu-miR-181d(2)	mmu-miR-181c-5p(1)//mmu-miR-181d-5p(1)	mmu-miR-181c(1)//mmu-miR-181d(1)	miR-181c-5p(1)	miR-181c-5p(1)//miR-181d-5p(1)	0.9	NA	NA	NA	NA	0	0.9
TANC2	mmu-miR-181c-5p(1)//mmu-miR-181d-5p(1)	mmu-miR-181c(2)//mmu-miR-181d(3)	mmu-miR-181c-5p(1)//mmu-miR-181d-5p(1)	mmu-miR-181c(2)//mmu-miR-181d(2)	miR-181d-5p(1)	miR-181c-5p(1)//miR-181d-5p(1)	0.9	NA	NA	NA	NA	0	0.9
TBC1D15	mmu-miR-181c-5p(1)//mmu-miR-181d-5p(1)	mmu-miR-181c(1)//mmu-miR-181d(1)	mmu-miR-181c-5p(1)//mmu-miR-181d-5p(1)	mmu-miR-181c(1)//mmu-miR-181d(1)	miR-181c-5p(1)	miR-181c-5p(1)//miR-181d-5p(1)	0.9	NA	NA	NA	NA	0	0.9
TBPL1	mmu-miR-181c-5p(1)//mmu-miR-181d-5p(1)	mmu-miR-181c(1)//mmu-miR-181d(1)	mmu-miR-181c-5p(1)//mmu-miR-181d-5p(1)	mmu-miR-181c(1)//mmu-miR-181d(1)	miR-181c-5p(1)	miR-181c-5p(1)//miR-181d-5p(1)	0.9	NA	NA	NA	NA	0	0.9
TCERG1	mmu-miR-181c-5p(2)//mmu-miR-181d-5p(2)	mmu-miR-181c(4)//mmu-miR-181d(4)	mmu-miR-181c-5p(1)//mmu-miR-181d-5p(1)	mmu-miR-181c(2)//mmu-miR-181d(2)	miR-181c-5p(1)	miR-181c-5p(1)//miR-181d-5p(1)	0.9	NA	NA	NA	NA	0	0.9
TGFBR1	mmu-miR-181c-5p(1)//mmu-miR-181d-5p(1)	mmu-miR-181c(2)//mmu-miR-181d(2)	mmu-miR-181c-5p(1)//mmu-miR-181d-5p(1)	mmu-miR-181c(1)//mmu-miR-181d(1)	miR-181c-5p(1)	miR-181c-5p(1)//miR-181d-5p(1)	0.9	NA	NA	NA	NA	0	0.9
TGIF2	mmu-miR-181c-5p(1)//mmu-miR-181d-5p(1)	mmu-miR-181c(1)//mmu-miR-181d(1)	mmu-miR-181c-5p(1)//mmu-miR-181d-5p(1)	mmu-miR-181c(1)//mmu-miR-181d(1)	miR-181c-5p(1)	miR-181c-5p(1)//miR-181d-5p(1)	0.9	NA	NA	NA	NA	0	0.9
TRAK1	mmu-miR-181c-5p(1)//mmu-miR-181d-5p(1)	mmu-miR-181c(3)//mmu-miR-181d(4)	mmu-miR-181c-5p(1)//mmu-miR-181d-5p(1)	mmu-miR-181c(1)//mmu-miR-181d(1)	miR-181c-5p(1)	miR-181c-5p(1)//miR-181d-5p(1)	0.9	NA	NA	NA	NA	0	0.9
TRIM2	mmu-miR-181c-5p(3)//mmu-miR-181d-5p(3)	mmu-miR-181c(5)//mmu-miR-181d(5)	mmu-miR-181c-5p(1)//mmu-miR-181d-5p(1)	mmu-miR-181c(1)//mmu-miR-181d(1)	miR-181c-5p(1)	miR-181c-5p(1)//miR-181d-5p(1)	0.9	NA	NA	NA	NA	0	0.9
TRIM71	mmu-miR-181c-5p(4)//mmu-miR-181d-5p(4)	mmu-miR-181c(2)//mmu-miR-181d(2)	mmu-miR-181c-5p(1)//mmu-miR-181d-5p(1)	mmu-miR-181c(1)//mmu-miR-181d(1)	miR-181c-5p(1)	miR-181c-5p(1)//miR-181d-5p(1)	0.9	NA	NA	NA	NA	0	0.9
UBP1	mmu-miR-181c-5p(1)//mmu-miR-181d-5p(1)	mmu-miR-181c(1)//mmu-miR-181d(1)	mmu-miR-181c-5p(1)//mmu-miR-181d-5p(1)	mmu-miR-181c(1)//mmu-miR-181d(1)	miR-181d-5p(1)	miR-181c-5p(1)//miR-181d-5p(1)	0.9	NA	NA	NA	NA	0	0.9
ZBTB34	mmu-miR-181c-5p(1)//mmu-miR-181d-5p(1)	mmu-miR-181c(1)//mmu-miR-181d(1)	mmu-miR-181c-5p(1)//mmu-miR-181d-5p(1)	mmu-miR-181c(2)//mmu-miR-181d(2)	miR-181c-5p(1)	miR-181c-5p(1)//miR-181d-5p(1)	0.9	NA	NA	NA	NA	0	0.9
ZFHX4	mmu-miR-181c-5p(1)//mmu-miR-181d-5p(1)	mmu-miR-181c(1)//mmu-miR-181d(1)	mmu-miR-181c-5p(1)//mmu-miR-181d-5p(1)	mmu-miR-181c(1)//mmu-miR-181d(1)	miR-181c-5p(1)	miR-181c-5p(1)//miR-181d-5p(1)	0.9	NA	NA	NA	NA	0	0.9
ZFP120	mmu-miR-181c-5p(4)//mmu-miR-181d-5p(4)	mmu-miR-181c(9)//mmu-miR-181d(13)	mmu-miR-181c-5p(1)//mmu-miR-181d-5p(1)	mmu-miR-181c(6)//mmu-miR-181d(6)	miR-181d-5p(1)	miR-181c-5p(1)//miR-181d-5p(1)	0.9	NA	NA	NA	NA	0	0.9
2810474O19RIK	mmu-miR-181c-5p(1)//mmu-miR-181d-5p(1)	mmu-miR-181c(3)//mmu-miR-181d(2)	mmu-miR-181c-5p(1)//mmu-miR-181d-5p(1)		miR-181c-5p(1)//miR-181d-5p(1)	miR-181c-5p(1)//miR-181d-5p(1)	0.85	NA	NA	NA	NA	0	0.85
ABI3BP	mmu-miR-181c-5p(1)//mmu-miR-181d-5p(1)	mmu-miR-181c(1)//mmu-miR-181d(1)	mmu-miR-181c-5p(1)//mmu-miR-181d-5p(1)		miR-181c-5p(1)//miR-181d-5p(1)	miR-181c-5p(1)//miR-181d-5p(1)	0.85	NA	NA	NA	NA	0	0.85
ACBD3		mmu-miR-181c(1)//mmu-miR-181d(1)	mmu-miR-181c-5p(1)//mmu-miR-181d-5p(1)	mmu-miR-181c(1)//mmu-miR-181d(1)	miR-181c-5p(1)//miR-181d-5p(1)	miR-181c-5p(1)//miR-181d-5p(1)	0.85	NA	NA	NA	NA	0	0.85
ADARB1	mmu-miR-181c-5p(1)//mmu-miR-181d-5p(1)	mmu-miR-181c(1)//mmu-miR-181d(1)	mmu-miR-181c-5p(1)//mmu-miR-181d-5p(1)		miR-181c-5p(1)//miR-181d-5p(1)	miR-181c-5p(1)//miR-181d-5p(1)	0.85	NA	NA	NA	NA	0	0.85
AFF4		mmu-miR-181c(2)//mmu-miR-181d(2)	mmu-miR-181c-5p(1)//mmu-miR-181d-5p(1)	mmu-miR-181c(1)//mmu-miR-181d(1)	miR-181c-5p(1)//miR-181d-5p(1)	miR-181c-5p(1)//miR-181d-5p(1)	0.85	NA	NA	NA	NA	0	0.85
AGFG1	mmu-miR-181c-5p(1)//mmu-miR-181d-5p(1)	mmu-miR-181c(3)//mmu-miR-181d(2)	mmu-miR-181c-5p(1)//mmu-miR-181d-5p(1)		miR-181c-5p(1)//miR-181d-5p(1)	miR-181c-5p(1)//miR-181d-5p(1)	0.85	NA	NA	NA	NA	0	0.85
AHNAK	mmu-miR-181c-5p(1)//mmu-miR-181d-5p(1)	mmu-miR-181c(2)//mmu-miR-181d(2)	mmu-miR-181c-5p(1)//mmu-miR-181d-5p(1)		miR-181c-5p(1)//miR-181d-5p(1)	miR-181c-5p(1)//miR-181d-5p(1)	0.85	NA	NA	NA	NA	0	0.85
AKIRIN2	mmu-miR-181c-5p(1)//mmu-miR-181d-5p(1)	mmu-miR-181c(2)//mmu-miR-181d(2)	mmu-miR-181c-5p(1)//mmu-miR-181d-5p(1)		miR-181c-5p(1)//miR-181d-5p(1)	miR-181c-5p(1)//miR-181d-5p(1)	0.85	NA	NA	NA	NA	0	0.85
AP1S3	mmu-miR-181c-5p(1)//mmu-miR-181d-5p(1)	mmu-miR-181c(1)//mmu-miR-181d(1)	mmu-miR-181c-5p(1)//mmu-miR-181d-5p(1)		miR-181c-5p(1)//miR-181d-5p(1)	miR-181c-5p(1)//miR-181d-5p(1)	0.85	NA	NA	NA	NA	0	0.85
ARIH1	mmu-miR-181c-5p(1)//mmu-miR-181d-5p(1)		mmu-miR-181c-5p(1)//mmu-miR-181d-5p(1)	mmu-miR-181c(1)//mmu-miR-181d(1)	miR-181c-5p(1)//miR-181d-5p(1)	miR-181c-5p(1)//miR-181d-5p(1)	0.85	NA	NA	NA	NA	0	0.85
ATP2B1	mmu-miR-181c-5p(2)//mmu-miR-181d-5p(2)	mmu-miR-181c(3)//mmu-miR-181d(4)	mmu-miR-181c-5p(1)//mmu-miR-181d-5p(1)		miR-181c-5p(1)//miR-181d-5p(1)	miR-181c-5p(1)//miR-181d-5p(1)	0.85	NA	NA	NA	NA	0	0.85
ATP8B2	mmu-miR-181c-5p(1)//mmu-miR-181d-5p(1)	mmu-miR-181c(1)//mmu-miR-181d(1)	mmu-miR-181c-5p(1)//mmu-miR-181d-5p(1)		miR-181c-5p(1)//miR-181d-5p(1)	miR-181c-5p(1)//miR-181d-5p(1)	0.85	NA	NA	NA	NA	0	0.85
BCL2	mmu-miR-181c-5p(1)//mmu-miR-181d-5p(1)	mmu-miR-181c(1)//mmu-miR-181d(1)	mmu-miR-181c-5p(1)//mmu-miR-181d-5p(1)		miR-181c-5p(1)//miR-181d-5p(1)	miR-181c-5p(1)//miR-181d-5p(1)	0.85	NA	NA	NA	NA	0	0.85
BRD1	mmu-miR-181c-5p(1)//mmu-miR-181d-5p(1)	mmu-miR-181c(1)//mmu-miR-181d(2)		mmu-miR-181c(1)//mmu-miR-181d(1)	miR-181c-5p(1)//miR-181d-5p(1)	miR-181c-5p(1)//miR-181d-5p(1)	0.85	NA	NA	NA	NA	0	0.85
CALD1		mmu-miR-181c(1)//mmu-miR-181d(1)	mmu-miR-181c-5p(1)//mmu-miR-181d-5p(1)	mmu-miR-181c(1)//mmu-miR-181d(1)	miR-181c-5p(1)//miR-181d-5p(1)	miR-181c-5p(1)//miR-181d-5p(1)	0.85	NA	NA	NA	NA	0	0.85
CALM1	mmu-miR-181c-5p(1)//mmu-miR-181d-5p(1)		mmu-miR-181c-5p(1)//mmu-miR-181d-5p(1)	mmu-miR-181c(1)//mmu-miR-181d(1)	miR-181c-5p(1)//miR-181d-5p(1)	miR-181c-5p(1)//miR-181d-5p(1)	0.85	NA	NA	NA	NA	0	0.85
CCNA2		mmu-miR-181c(1)//mmu-miR-181d(1)	mmu-miR-181c-5p(1)//mmu-miR-181d-5p(1)	mmu-miR-181c(1)//mmu-miR-181d(1)	miR-181c-5p(1)//miR-181d-5p(1)	miR-181c-5p(1)//miR-181d-5p(1)	0.85	NA	NA	NA	NA	0	0.85
CCNG1	mmu-miR-181c-5p(1)//mmu-miR-181d-5p(1)	mmu-miR-181c(1)//mmu-miR-181d(1)	mmu-miR-181c-5p(1)//mmu-miR-181d-5p(1)		miR-181c-5p(1)//miR-181d-5p(1)	miR-181c-5p(1)//miR-181d-5p(1)	0.85	NA	NA	NA	NA	0	0.85
CDK17	mmu-miR-181c-5p(1)//mmu-miR-181d-5p(1)	mmu-miR-181c(3)//mmu-miR-181d(3)	mmu-miR-181c-5p(1)//mmu-miR-181d-5p(1)		miR-181c-5p(1)//miR-181d-5p(1)	miR-181c-5p(1)//miR-181d-5p(1)	0.85	NA	NA	NA	NA	0	0.85
CEP97	mmu-miR-181c-5p(1)//mmu-miR-181d-5p(1)	mmu-miR-181c(2)//mmu-miR-181d(2)	mmu-miR-181c-5p(1)//mmu-miR-181d-5p(1)		miR-181c-5p(1)//miR-181d-5p(1)	miR-181c-5p(1)//miR-181d-5p(1)	0.85	NA	NA	NA	NA	0	0.85
CHD7	mmu-miR-181c-5p(1)//mmu-miR-181d-5p(1)	mmu-miR-181c(1)//mmu-miR-181d(1)	mmu-miR-181c-5p(1)//mmu-miR-181d-5p(1)		miR-181c-5p(1)//miR-181d-5p(1)	miR-181c-5p(1)//miR-181d-5p(1)	0.85	NA	NA	NA	NA	0	0.85
CNOT6L	mmu-miR-181c-5p(1)//mmu-miR-181d-5p(1)	mmu-miR-181c(2)//mmu-miR-181d(2)	mmu-miR-181c-5p(1)//mmu-miR-181d-5p(1)		miR-181c-5p(1)//miR-181d-5p(1)	miR-181c-5p(1)//miR-181d-5p(1)	0.85	NA	NA	NA	NA	0	0.85
CPSF6	mmu-miR-181c-5p(1)//mmu-miR-181d-5p(1)	mmu-miR-181c(1)//mmu-miR-181d(1)	mmu-miR-181c-5p(1)//mmu-miR-181d-5p(1)		miR-181c-5p(1)//miR-181d-5p(1)	miR-181c-5p(1)//miR-181d-5p(1)	0.85	NA	NA	NA	NA	0	0.85
CREB1	mmu-miR-181c-5p(2)//mmu-miR-181d-5p(2)		mmu-miR-181c-5p(1)//mmu-miR-181d-5p(1)	mmu-miR-181c(2)//mmu-miR-181d(2)	miR-181c-5p(1)//miR-181d-5p(1)	miR-181c-5p(1)//miR-181d-5p(1)	0.85	NA	NA	NA	NA	0	0.85
CRYBG3	mmu-miR-181c-5p(1)//mmu-miR-181d-5p(1)	mmu-miR-181c(1)//mmu-miR-181d(1)	mmu-miR-181c-5p(1)//mmu-miR-181d-5p(1)		miR-181c-5p(1)//miR-181d-5p(1)	miR-181c-5p(1)//miR-181d-5p(1)	0.85	NA	NA	NA	NA	0	0.85
CSNK1A1	mmu-miR-181c-5p(1)//mmu-miR-181d-5p(1)	mmu-miR-181c(1)//mmu-miR-181d(1)	mmu-miR-181c-5p(1)//mmu-miR-181d-5p(1)		miR-181c-5p(1)//miR-181d-5p(1)	miR-181c-5p(1)//miR-181d-5p(1)	0.85	NA	NA	NA	NA	0	0.85
DMXL2	mmu-miR-181c-5p(2)//mmu-miR-181d-5p(2)	mmu-miR-181c(1)//mmu-miR-181d(1)	mmu-miR-181c-5p(1)//mmu-miR-181d-5p(1)		miR-181c-5p(1)//miR-181d-5p(1)	miR-181c-5p(1)//miR-181d-5p(1)	0.85	NA	NA	NA	NA	0	0.85
DUSP6	mmu-miR-181c-5p(1)//mmu-miR-181d-5p(1)	mmu-miR-181c(1)//mmu-miR-181d(1)	mmu-miR-181c-5p(1)//mmu-miR-181d-5p(1)		miR-181c-5p(1)//miR-181d-5p(1)	miR-181c-5p(1)//miR-181d-5p(1)	0.85	NA	NA	NA	NA	0	0.85
FAM102A	mmu-miR-181c-5p(1)//mmu-miR-181d-5p(1)	mmu-miR-181c(1)//mmu-miR-181d(1)	mmu-miR-181c-5p(1)//mmu-miR-181d-5p(1)		miR-181c-5p(1)//miR-181d-5p(1)	miR-181c-5p(1)//miR-181d-5p(1)	0.85	NA	NA	NA	NA	0	0.85
FAM160A2	mmu-miR-181c-5p(1)//mmu-miR-181d-5p(1)	mmu-miR-181c(1)//mmu-miR-181d(1)	mmu-miR-181c-5p(1)//mmu-miR-181d-5p(1)		miR-181c-5p(1)//miR-181d-5p(1)	miR-181c-5p(1)//miR-181d-5p(1)	0.85	NA	NA	NA	NA	0	0.85
FARP2	mmu-miR-181c-5p(1)//mmu-miR-181d-5p(1)	mmu-miR-181c(1)//mmu-miR-181d(1)	mmu-miR-181c-5p(1)//mmu-miR-181d-5p(1)		miR-181c-5p(1)//miR-181d-5p(1)	miR-181c-5p(1)//miR-181d-5p(1)	0.85	NA	NA	NA	NA	0	0.85
FOXJ3		mmu-miR-181c(2)//mmu-miR-181d(2)	mmu-miR-181c-5p(1)//mmu-miR-181d-5p(1)	mmu-miR-181c(1)//mmu-miR-181d(1)	miR-181c-5p(1)//miR-181d-5p(1)	miR-181c-5p(1)//miR-181d-5p(1)	0.85	NA	NA	NA	NA	0	0.85
GCC2		mmu-miR-181c(2)//mmu-miR-181d(2)	mmu-miR-181c-5p(1)//mmu-miR-181d-5p(1)	mmu-miR-181c(1)//mmu-miR-181d(1)	miR-181c-5p(1)//miR-181d-5p(1)	miR-181c-5p(1)//miR-181d-5p(1)	0.85	NA	NA	NA	NA	0	0.85
GHITM	mmu-miR-181c-5p(1)//mmu-miR-181d-5p(1)	mmu-miR-181c(1)//mmu-miR-181d(1)	mmu-miR-181c-5p(1)//mmu-miR-181d-5p(1)		miR-181c-5p(1)//miR-181d-5p(1)	miR-181c-5p(1)//miR-181d-5p(1)	0.85	NA	NA	NA	NA	0	0.85
GLS		mmu-miR-181c(2)//mmu-miR-181d(3)	mmu-miR-181c-5p(1)//mmu-miR-181d-5p(1)	mmu-miR-181c(1)//mmu-miR-181d(1)	miR-181c-5p(1)//miR-181d-5p(1)	miR-181c-5p(1)//miR-181d-5p(1)	0.85	NA	NA	NA	NA	0	0.85
GREB1L	mmu-miR-181c-5p(3)//mmu-miR-181d-5p(3)	mmu-miR-181c(2)//mmu-miR-181d(4)	mmu-miR-181c-5p(1)//mmu-miR-181d-5p(1)		miR-181c-5p(1)//miR-181d-5p(1)	miR-181c-5p(1)//miR-181d-5p(1)	0.85	NA	NA	NA	NA	0	0.85
HSPA5	mmu-miR-181c-5p(1)//mmu-miR-181d-5p(1)	mmu-miR-181c(1)//mmu-miR-181d(1)	mmu-miR-181c-5p(1)//mmu-miR-181d-5p(1)		miR-181c-5p(1)//miR-181d-5p(1)	miR-181c-5p(1)//miR-181d-5p(1)	0.85	NA	NA	NA	NA	0	0.85
ID2		mmu-miR-181c(1)//mmu-miR-181d(1)	mmu-miR-181c-5p(1)//mmu-miR-181d-5p(1)	mmu-miR-181c(1)//mmu-miR-181d(1)	miR-181c-5p(1)//miR-181d-5p(1)	miR-181c-5p(1)//miR-181d-5p(1)	0.85	NA	NA	NA	NA	0	0.85
ITCH		mmu-miR-181c(1)//mmu-miR-181d(2)	mmu-miR-181c-5p(1)//mmu-miR-181d-5p(1)	mmu-miR-181c(1)//mmu-miR-181d(1)	miR-181c-5p(1)//miR-181d-5p(1)	miR-181c-5p(1)//miR-181d-5p(1)	0.85	NA	NA	NA	NA	0	0.85
JAZF1	mmu-miR-181c-5p(1)//mmu-miR-181d-5p(1)	mmu-miR-181c(1)//mmu-miR-181d(1)	mmu-miR-181c-5p(1)//mmu-miR-181d-5p(1)		miR-181c-5p(1)//miR-181d-5p(1)	miR-181c-5p(1)//miR-181d-5p(1)	0.85	NA	NA	NA	NA	0	0.85
KLF3	mmu-miR-181c-5p(1)//mmu-miR-181d-5p(1)	mmu-miR-181c(2)//mmu-miR-181d(2)	mmu-miR-181c-5p(1)//mmu-miR-181d-5p(1)		miR-181c-5p(1)//miR-181d-5p(1)	miR-181c-5p(1)//miR-181d-5p(1)	0.85	NA	NA	NA	NA	0	0.85
LCLAT1	mmu-miR-181c-5p(1)//mmu-miR-181d-5p(1)	mmu-miR-181c(1)//mmu-miR-181d(1)	mmu-miR-181c-5p(1)//mmu-miR-181d-5p(1)		miR-181c-5p(1)//miR-181d-5p(1)	miR-181c-5p(1)//miR-181d-5p(1)	0.85	NA	NA	NA	NA	0	0.85
LONRF1	mmu-miR-181c-5p(1)//mmu-miR-181d-5p(1)	mmu-miR-181c(1)//mmu-miR-181d(1)	mmu-miR-181c-5p(1)//mmu-miR-181d-5p(1)		miR-181c-5p(1)//miR-181d-5p(1)	miR-181c-5p(1)//miR-181d-5p(1)	0.85	NA	NA	NA	NA	0	0.85
LRRC32	mmu-miR-181c-5p(1)//mmu-miR-181d-5p(1)		mmu-miR-181c-5p(1)//mmu-miR-181d-5p(1)	mmu-miR-181c(1)//mmu-miR-181d(1)	miR-181c-5p(1)//miR-181d-5p(1)	miR-181c-5p(1)//miR-181d-5p(1)	0.85	NA	NA	NA	NA	0	0.85
MARCH6		mmu-miR-181c(1)//mmu-miR-181d(1)	mmu-miR-181c-5p(1)//mmu-miR-181d-5p(1)	mmu-miR-181c(1)//mmu-miR-181d(1)	miR-181c-5p(1)//miR-181d-5p(1)	miR-181c-5p(1)//miR-181d-5p(1)	0.85	NA	NA	NA	NA	0	0.85
MYCBP2	mmu-miR-181c-5p(1)//mmu-miR-181d-5p(1)	mmu-miR-181c(1)//mmu-miR-181d(1)	mmu-miR-181c-5p(1)//mmu-miR-181d-5p(1)		miR-181c-5p(1)//miR-181d-5p(1)	miR-181c-5p(1)//miR-181d-5p(1)	0.85	NA	NA	NA	NA	0	0.85
NAA50	mmu-miR-181c-5p(1)//mmu-miR-181d-5p(1)	mmu-miR-181c(2)//mmu-miR-181d(2)	mmu-miR-181c-5p(1)//mmu-miR-181d-5p(1)		miR-181c-5p(1)//miR-181d-5p(1)	miR-181c-5p(1)//miR-181d-5p(1)	0.85	NA	NA	NA	NA	0	0.85
NAB1	mmu-miR-181c-5p(1)//mmu-miR-181d-5p(1)	mmu-miR-181c(2)//mmu-miR-181d(3)	mmu-miR-181c-5p(1)//mmu-miR-181d-5p(1)		miR-181c-5p(1)//miR-181d-5p(1)	miR-181c-5p(1)//miR-181d-5p(1)	0.85	NA	NA	NA	NA	0	0.85
ONECUT2	mmu-miR-181c-5p(3)//mmu-miR-181d-5p(3)		mmu-miR-181c-5p(1)//mmu-miR-181d-5p(1)	mmu-miR-181c(2)//mmu-miR-181d(2)	miR-181c-5p(1)//miR-181d-5p(1)	miR-181c-5p(1)//miR-181d-5p(1)	0.85	NA	NA	NA	NA	0	0.85
PAK2		mmu-miR-181c(1)//mmu-miR-181d(2)	mmu-miR-181c-5p(1)//mmu-miR-181d-5p(1)	mmu-miR-181c(1)//mmu-miR-181d(1)	miR-181c-5p(1)//miR-181d-5p(1)	miR-181c-5p(1)//miR-181d-5p(1)	0.85	NA	NA	NA	NA	0	0.85
PPARA	mmu-miR-181c-5p(1)//mmu-miR-181d-5p(1)		mmu-miR-181c-5p(1)//mmu-miR-181d-5p(1)	mmu-miR-181c(1)//mmu-miR-181d(1)	miR-181c-5p(1)//miR-181d-5p(1)	miR-181c-5p(1)//miR-181d-5p(1)	0.85	NA	NA	NA	NA	0	0.85
PPIP5K2	mmu-miR-181c-5p(2)//mmu-miR-181d-5p(2)	mmu-miR-181c(1)//mmu-miR-181d(2)	mmu-miR-181c-5p(1)//mmu-miR-181d-5p(1)		miR-181c-5p(1)//miR-181d-5p(1)	miR-181c-5p(1)//miR-181d-5p(1)	0.85	NA	NA	NA	NA	0	0.85
PPP1R9A		mmu-miR-181c(1)//mmu-miR-181d(1)	mmu-miR-181c-5p(1)//mmu-miR-181d-5p(1)	mmu-miR-181c(1)//mmu-miR-181d(1)	miR-181c-5p(1)//miR-181d-5p(1)	miR-181c-5p(1)//miR-181d-5p(1)	0.85	NA	NA	NA	NA	0	0.85
PSPC1	mmu-miR-181c-5p(1)//mmu-miR-181d-5p(1)	mmu-miR-181c(1)//mmu-miR-181d(1)		mmu-miR-181c(1)//mmu-miR-181d(1)	miR-181c-5p(1)//miR-181d-5p(1)	miR-181c-5p(1)//miR-181d-5p(1)	0.85	NA	NA	NA	NA	0	0.85
RBM27	mmu-miR-181c-5p(1)//mmu-miR-181d-5p(1)	mmu-miR-181c(1)//mmu-miR-181d(1)	mmu-miR-181c-5p(1)//mmu-miR-181d-5p(1)		miR-181c-5p(1)//miR-181d-5p(1)	miR-181c-5p(1)//miR-181d-5p(1)	0.85	NA	NA	NA	NA	0	0.85
RIMKLB	mmu-miR-181c-5p(1)//mmu-miR-181d-5p(1)	mmu-miR-181c(1)//mmu-miR-181d(2)	mmu-miR-181c-5p(1)//mmu-miR-181d-5p(1)		miR-181c-5p(1)//miR-181d-5p(1)	miR-181c-5p(1)//miR-181d-5p(1)	0.85	NA	NA	NA	NA	0	0.85
RMND5A	mmu-miR-181c-5p(1)//mmu-miR-181d-5p(1)	mmu-miR-181c(1)//mmu-miR-181d(3)	mmu-miR-181c-5p(1)//mmu-miR-181d-5p(1)		miR-181c-5p(1)//miR-181d-5p(1)	miR-181c-5p(1)//miR-181d-5p(1)	0.85	NA	NA	NA	NA	0	0.85
RNMT	mmu-miR-181c-5p(1)//mmu-miR-181d-5p(1)	mmu-miR-181c(1)//mmu-miR-181d(1)	mmu-miR-181c-5p(1)//mmu-miR-181d-5p(1)		miR-181c-5p(1)//miR-181d-5p(1)	miR-181c-5p(1)//miR-181d-5p(1)	0.85	NA	NA	NA	NA	0	0.85
RORB	mmu-miR-181c-5p(3)//mmu-miR-181d-5p(3)	mmu-miR-181c(3)//mmu-miR-181d(5)	mmu-miR-181c-5p(1)//mmu-miR-181d-5p(1)		miR-181c-5p(1)//miR-181d-5p(1)	miR-181c-5p(1)//miR-181d-5p(1)	0.85	NA	NA	NA	NA	0	0.85
RSF1	mmu-miR-181c-5p(1)//mmu-miR-181d-5p(1)	mmu-miR-181c(1)//mmu-miR-181d(1)	mmu-miR-181c-5p(1)//mmu-miR-181d-5p(1)		miR-181c-5p(1)//miR-181d-5p(1)	miR-181c-5p(1)//miR-181d-5p(1)	0.85	NA	NA	NA	NA	0	0.85
S1PR1	mmu-miR-181c-5p(2)//mmu-miR-181d-5p(2)	mmu-miR-181c(2)//mmu-miR-181d(2)	mmu-miR-181c-5p(1)//mmu-miR-181d-5p(1)		miR-181c-5p(1)//miR-181d-5p(1)	miR-181c-5p(1)//miR-181d-5p(1)	0.85	NA	NA	NA	NA	0	0.85
SIPA1L1	mmu-miR-181c-5p(1)//mmu-miR-181d-5p(1)	mmu-miR-181c(1)//mmu-miR-181d(1)	mmu-miR-181c-5p(1)//mmu-miR-181d-5p(1)		miR-181c-5p(1)//miR-181d-5p(1)	miR-181c-5p(1)//miR-181d-5p(1)	0.85	NA	NA	NA	NA	0	0.85
SLC25A25	mmu-miR-181c-5p(1)//mmu-miR-181d-5p(1)		mmu-miR-181c-5p(1)//mmu-miR-181d-5p(1)	mmu-miR-181c(1)//mmu-miR-181d(1)	miR-181c-5p(1)//miR-181d-5p(1)	miR-181c-5p(1)//miR-181d-5p(1)	0.85	NA	NA	NA	NA	0	0.85
SLC37A3	mmu-miR-181c-5p(1)//mmu-miR-181d-5p(1)	mmu-miR-181c(1)//mmu-miR-181d(1)	mmu-miR-181c-5p(1)//mmu-miR-181d-5p(1)		miR-181c-5p(1)//miR-181d-5p(1)	miR-181c-5p(1)//miR-181d-5p(1)	0.85	NA	NA	NA	NA	0	0.85
SLC9A6		mmu-miR-181c(2)//mmu-miR-181d(2)	mmu-miR-181c-5p(1)//mmu-miR-181d-5p(1)	mmu-miR-181c(1)//mmu-miR-181d(1)	miR-181c-5p(1)//miR-181d-5p(1)	miR-181c-5p(1)//miR-181d-5p(1)	0.85	NA	NA	NA	NA	0	0.85
TAOK1	mmu-miR-181c-5p(1)//mmu-miR-181d-5p(1)		mmu-miR-181c-5p(1)//mmu-miR-181d-5p(1)	mmu-miR-181c(1)//mmu-miR-181d(1)	miR-181c-5p(1)//miR-181d-5p(1)	miR-181c-5p(1)//miR-181d-5p(1)	0.85	NA	NA	NA	NA	0	0.85
TGFBR3	mmu-miR-181c-5p(1)//mmu-miR-181d-5p(1)	mmu-miR-181c(1)//mmu-miR-181d(1)	mmu-miR-181c-5p(1)//mmu-miR-181d-5p(1)		miR-181c-5p(1)//miR-181d-5p(1)	miR-181c-5p(1)//miR-181d-5p(1)	0.85	NA	NA	NA	NA	0	0.85
TMCC1	mmu-miR-181c-5p(2)//mmu-miR-181d-5p(2)	mmu-miR-181c(1)//mmu-miR-181d(1)	mmu-miR-181c-5p(1)//mmu-miR-181d-5p(1)		miR-181c-5p(1)//miR-181d-5p(1)	miR-181c-5p(1)//miR-181d-5p(1)	0.85	NA	NA	NA	NA	0	0.85
TMED4	mmu-miR-181c-5p(1)//mmu-miR-181d-5p(1)	mmu-miR-181c(1)//mmu-miR-181d(2)	mmu-miR-181c-5p(1)//mmu-miR-181d-5p(1)		miR-181c-5p(1)//miR-181d-5p(1)	miR-181c-5p(1)//miR-181d-5p(1)	0.85	NA	NA	NA	NA	0	0.85
TMEM30A	mmu-miR-181c-5p(1)//mmu-miR-181d-5p(1)	mmu-miR-181c(1)//mmu-miR-181d(1)	mmu-miR-181c-5p(1)//mmu-miR-181d-5p(1)		miR-181c-5p(1)//miR-181d-5p(1)	miR-181c-5p(1)//miR-181d-5p(1)	0.85	NA	NA	NA	NA	0	0.85
TNRC6B	mmu-miR-181c-5p(1)//mmu-miR-181d-5p(1)		mmu-miR-181c-5p(1)//mmu-miR-181d-5p(1)	mmu-miR-181c(2)//mmu-miR-181d(2)	miR-181c-5p(1)//miR-181d-5p(1)	miR-181c-5p(1)//miR-181d-5p(1)	0.85	NA	NA	NA	NA	0	0.85
TXNDC12	mmu-miR-181c-5p(1)//mmu-miR-181d-5p(1)	mmu-miR-181c(1)//mmu-miR-181d(1)	mmu-miR-181c-5p(1)//mmu-miR-181d-5p(1)		miR-181c-5p(1)//miR-181d-5p(1)	miR-181c-5p(1)//miR-181d-5p(1)	0.85	NA	NA	NA	NA	0	0.85
TXNDC5	mmu-miR-181c-5p(1)//mmu-miR-181d-5p(1)	mmu-miR-181c(1)//mmu-miR-181d(1)	mmu-miR-181c-5p(1)//mmu-miR-181d-5p(1)		miR-181c-5p(1)//miR-181d-5p(1)	miR-181c-5p(1)//miR-181d-5p(1)	0.85	NA	NA	NA	NA	0	0.85
UBN2	mmu-miR-181c-5p(2)//mmu-miR-181d-5p(2)	mmu-miR-181c(1)//mmu-miR-181d(2)	mmu-miR-181c-5p(1)//mmu-miR-181d-5p(1)		miR-181c-5p(1)//miR-181d-5p(1)	miR-181c-5p(1)//miR-181d-5p(1)	0.85	NA	NA	NA	NA	0	0.85
USP14		mmu-miR-181c(1)//mmu-miR-181d(2)	mmu-miR-181c-5p(1)//mmu-miR-181d-5p(1)	mmu-miR-181c(1)//mmu-miR-181d(1)	miR-181c-5p(1)//miR-181d-5p(1)	miR-181c-5p(1)//miR-181d-5p(1)	0.85	NA	NA	NA	NA	0	0.85
USP33	mmu-miR-181c-5p(1)//mmu-miR-181d-5p(1)	mmu-miR-181c(6)//mmu-miR-181d(4)		mmu-miR-181c(2)//mmu-miR-181d(2)	miR-181c-5p(1)//miR-181d-5p(1)	miR-181c-5p(1)//miR-181d-5p(1)	0.85	NA	NA	NA	NA	0	0.85
WSB1	mmu-miR-181c-5p(1)//mmu-miR-181d-5p(1)	mmu-miR-181c(2)//mmu-miR-181d(2)	mmu-miR-181c-5p(1)//mmu-miR-181d-5p(1)		miR-181c-5p(1)//miR-181d-5p(1)	miR-181c-5p(1)//miR-181d-5p(1)	0.85	NA	NA	NA	NA	0	0.85
ZBTB41	mmu-miR-181c-5p(1)//mmu-miR-181d-5p(1)		mmu-miR-181c-5p(1)//mmu-miR-181d-5p(1)	mmu-miR-181c(1)//mmu-miR-181d(1)	miR-181c-5p(1)//miR-181d-5p(1)	miR-181c-5p(1)//miR-181d-5p(1)	0.85	NA	NA	NA	NA	0	0.85
ZC3H11A		mmu-miR-181c(1)//mmu-miR-181d(1)	mmu-miR-181c-5p(1)//mmu-miR-181d-5p(1)	mmu-miR-181c(1)//mmu-miR-181d(1)	miR-181c-5p(1)//miR-181d-5p(1)	miR-181c-5p(1)//miR-181d-5p(1)	0.85	NA	NA	NA	NA	0	0.85
ZIC2	mmu-miR-181c-5p(1)//mmu-miR-181d-5p(1)	mmu-miR-181c(2)//mmu-miR-181d(2)		mmu-miR-181c(1)//mmu-miR-181d(1)	miR-181c-5p(1)//miR-181d-5p(1)	miR-181c-5p(1)//miR-181d-5p(1)	0.85	NA	NA	NA	NA	0	0.85
4921524J17RIK	mmu-miR-181c-5p(1)//mmu-miR-181d-5p(1)	mmu-miR-181c(3)//mmu-miR-181d(3)	mmu-miR-181c-5p(1)//mmu-miR-181d-5p(1)	mmu-miR-181c(2)//mmu-miR-181d(2)		miR-181c-5p(1)//miR-181d-5p(1)	0.8	NA	NA	NA	NA	0	0.8
ACTR2	mmu-miR-181c-5p(1)//mmu-miR-181d-5p(1)	mmu-miR-181c(1)//mmu-miR-181d(1)	mmu-miR-181c-5p(1)//mmu-miR-181d-5p(1)	mmu-miR-181c(1)//mmu-miR-181d(1)		miR-181c-5p(1)//miR-181d-5p(1)	0.8	NA	NA	NA	NA	0	0.8
ACVR2A	mmu-miR-181c-5p(1)//mmu-miR-181d-5p(1)	mmu-miR-181c(1)//mmu-miR-181d(1)	mmu-miR-181c-5p(1)//mmu-miR-181d-5p(1)	mmu-miR-181c(1)//mmu-miR-181d(1)		miR-181c-5p(1)//miR-181d-5p(1)	0.8	NA	NA	NA	NA	0	0.8
ADAM11	mmu-miR-181c-5p(2)//mmu-miR-181d-5p(2)	mmu-miR-181c(3)//mmu-miR-181d(3)	mmu-miR-181c-5p(1)//mmu-miR-181d-5p(1)	mmu-miR-181c(2)//mmu-miR-181d(2)		miR-181c-5p(1)//miR-181d-5p(1)	0.8	NA	NA	NA	NA	0	0.8
ADRBK1	mmu-miR-181c-5p(1)//mmu-miR-181d-5p(1)	mmu-miR-181c(1)//mmu-miR-181d(1)	mmu-miR-181c-5p(1)//mmu-miR-181d-5p(1)	mmu-miR-181c(1)//mmu-miR-181d(1)	miR-181c-5p(1)//miR-181d-5p(1)		0.8	NA	NA	NA	NA	0	0.8
AFG3L2	mmu-miR-181c-5p(1)//mmu-miR-181d-5p(1)	mmu-miR-181c(1)//mmu-miR-181d(1)	mmu-miR-181c-5p(1)//mmu-miR-181d-5p(1)	mmu-miR-181c(1)//mmu-miR-181d(1)		miR-181c-5p(1)//miR-181d-5p(1)	0.8	NA	NA	NA	NA	0	0.8
AGPAT1	mmu-miR-181c-5p(1)//mmu-miR-181d-5p(1)	mmu-miR-181c(1)//mmu-miR-181d(1)	mmu-miR-181c-5p(1)//mmu-miR-181d-5p(1)	mmu-miR-181c(1)//mmu-miR-181d(1)		miR-181c-5p(1)//miR-181d-5p(1)	0.8	NA	NA	NA	NA	0	0.8
AKAP6	mmu-miR-181c-5p(1)//mmu-miR-181d-5p(1)	mmu-miR-181c(1)//mmu-miR-181d(1)	mmu-miR-181c-5p(1)//mmu-miR-181d-5p(1)	mmu-miR-181c(1)//mmu-miR-181d(1)		miR-181c-5p(1)//miR-181d-5p(1)	0.8	NA	NA	NA	NA	0	0.8
ANKRD52	mmu-miR-181c-5p(1)//mmu-miR-181d-5p(1)	mmu-miR-181c(1)//mmu-miR-181d(1)	mmu-miR-181c-5p(1)//mmu-miR-181d-5p(1)	mmu-miR-181c(1)//mmu-miR-181d(1)		miR-181c-5p(1)//miR-181d-5p(1)	0.8	NA	NA	NA	NA	0	0.8
APBA1	mmu-miR-181c-5p(1)//mmu-miR-181d-5p(1)	mmu-miR-181c(1)//mmu-miR-181d(1)	mmu-miR-181c-5p(1)//mmu-miR-181d-5p(1)	mmu-miR-181c(1)//mmu-miR-181d(1)		miR-181c-5p(1)//miR-181d-5p(1)	0.8	NA	NA	NA	NA	0	0.8
ARL5A	mmu-miR-181c-5p(1)//mmu-miR-181d-5p(1)	mmu-miR-181c(1)//mmu-miR-181d(2)	mmu-miR-181c-5p(1)//mmu-miR-181d-5p(1)	mmu-miR-181c(1)//mmu-miR-181d(1)		miR-181c-5p(1)//miR-181d-5p(1)	0.8	NA	NA	NA	NA	0	0.8
ATP2B2	mmu-miR-181c-5p(2)//mmu-miR-181d-5p(2)	mmu-miR-181c(2)//mmu-miR-181d(2)	mmu-miR-181c-5p(1)//mmu-miR-181d-5p(1)	mmu-miR-181c(1)//mmu-miR-181d(1)		miR-181c-5p(1)//miR-181d-5p(1)	0.8	NA	NA	NA	NA	0	0.8
ATP8A1	mmu-miR-181c-5p(1)//mmu-miR-181d-5p(1)	mmu-miR-181c(1)//mmu-miR-181d(1)	mmu-miR-181c-5p(1)//mmu-miR-181d-5p(1)	mmu-miR-181c(1)//mmu-miR-181d(1)		miR-181c-5p(1)//miR-181d-5p(1)	0.8	NA	NA	NA	NA	0	0.8
BAZ2B	mmu-miR-181c-5p(1)//mmu-miR-181d-5p(1)	mmu-miR-181c(2)//mmu-miR-181d(2)	mmu-miR-181c-5p(1)//mmu-miR-181d-5p(1)	mmu-miR-181c(1)//mmu-miR-181d(1)		miR-181c-5p(1)//miR-181d-5p(1)	0.8	NA	NA	NA	NA	0	0.8
BCLAF1	mmu-miR-181c-5p(2)//mmu-miR-181d-5p(2)	mmu-miR-181c(2)//mmu-miR-181d(3)	mmu-miR-181c-5p(1)//mmu-miR-181d-5p(1)	mmu-miR-181c(1)//mmu-miR-181d(1)		miR-181c-5p(1)//miR-181d-5p(1)	0.8	NA	NA	NA	NA	0	0.8
BPTF	mmu-miR-181c-5p(1)//mmu-miR-181d-5p(1)	mmu-miR-181c(1)//mmu-miR-181d(1)	mmu-miR-181c-5p(1)//mmu-miR-181d-5p(1)	mmu-miR-181c(1)//mmu-miR-181d(1)		miR-181c-5p(1)//miR-181d-5p(1)	0.8	NA	NA	NA	NA	0	0.8
CACNA2D2	mmu-miR-181c-5p(1)//mmu-miR-181d-5p(1)	mmu-miR-181c(2)//mmu-miR-181d(2)	mmu-miR-181c-5p(1)//mmu-miR-181d-5p(1)	mmu-miR-181c(1)//mmu-miR-181d(1)		miR-181c-5p(1)//miR-181d-5p(1)	0.8	NA	NA	NA	NA	0	0.8
CAMK2G	mmu-miR-181c-5p(1)//mmu-miR-181d-5p(1)	mmu-miR-181c(1)//mmu-miR-181d(1)	mmu-miR-181c-5p(1)//mmu-miR-181d-5p(1)	mmu-miR-181c(1)//mmu-miR-181d(1)		miR-181c-5p(1)//miR-181d-5p(1)	0.8	NA	NA	NA	NA	0	0.8
CARD11	mmu-miR-181c-5p(1)//mmu-miR-181d-5p(1)	mmu-miR-181c(1)//mmu-miR-181d(1)	mmu-miR-181c-5p(1)//mmu-miR-181d-5p(1)	mmu-miR-181c(1)//mmu-miR-181d(1)		miR-181c-5p(1)//miR-181d-5p(1)	0.8	NA	NA	NA	NA	0	0.8
CBX7	mmu-miR-181c-5p(2)//mmu-miR-181d-5p(2)	mmu-miR-181c(5)//mmu-miR-181d(5)	mmu-miR-181c-5p(1)//mmu-miR-181d-5p(1)	mmu-miR-181c(2)//mmu-miR-181d(2)		miR-181c-5p(1)//miR-181d-5p(1)	0.8	NA	NA	NA	NA	0	0.8
CCAR1	mmu-miR-181c-5p(1)//mmu-miR-181d-5p(1)	mmu-miR-181c(1)//mmu-miR-181d(1)	mmu-miR-181c-5p(1)//mmu-miR-181d-5p(1)	mmu-miR-181c(1)//mmu-miR-181d(1)		miR-181c-5p(1)//miR-181d-5p(1)	0.8	NA	NA	NA	NA	0	0.8
CCNK	mmu-miR-181c-5p(1)//mmu-miR-181d-5p(1)	mmu-miR-181c(1)//mmu-miR-181d(1)	mmu-miR-181c-5p(1)//mmu-miR-181d-5p(1)	mmu-miR-181c(1)//mmu-miR-181d(1)		miR-181c-5p(1)//miR-181d-5p(1)	0.8	NA	NA	NA	NA	0	0.8
CD163	mmu-miR-181c-5p(1)//mmu-miR-181d-5p(1)	mmu-miR-181c(2)//mmu-miR-181d(4)	mmu-miR-181c-5p(1)//mmu-miR-181d-5p(1)	mmu-miR-181c(1)//mmu-miR-181d(1)		miR-181c-5p(1)//miR-181d-5p(1)	0.8	NA	NA	NA	NA	0	0.8
CD4	mmu-miR-181c-5p(1)//mmu-miR-181d-5p(1)	mmu-miR-181c(1)//mmu-miR-181d(1)	mmu-miR-181c-5p(1)//mmu-miR-181d-5p(1)	mmu-miR-181c(1)//mmu-miR-181d(1)		miR-181c-5p(1)//miR-181d-5p(1)	0.8	NA	NA	NA	NA	0	0.8
CDC73	mmu-miR-181c-5p(1)//mmu-miR-181d-5p(1)	mmu-miR-181c(2)//mmu-miR-181d(1)	mmu-miR-181c-5p(1)//mmu-miR-181d-5p(1)	mmu-miR-181c(1)//mmu-miR-181d(1)		miR-181c-5p(1)//miR-181d-5p(1)	0.8	NA	NA	NA	NA	0	0.8
CDKL2	mmu-miR-181c-5p(1)//mmu-miR-181d-5p(1)	mmu-miR-181c(2)//mmu-miR-181d(2)	mmu-miR-181c-5p(1)//mmu-miR-181d-5p(1)	mmu-miR-181c(1)//mmu-miR-181d(1)		miR-181c-5p(1)//miR-181d-5p(1)	0.8	NA	NA	NA	NA	0	0.8
CDKN2AIP	mmu-miR-181c-5p(1)//mmu-miR-181d-5p(1)	mmu-miR-181c(1)//mmu-miR-181d(1)	mmu-miR-181c-5p(1)//mmu-miR-181d-5p(1)	mmu-miR-181c(1)//mmu-miR-181d(1)		miR-181c-5p(1)//miR-181d-5p(1)	0.8	NA	NA	NA	NA	0	0.8
CHD9	mmu-miR-181c-5p(1)//mmu-miR-181d-5p(1)	mmu-miR-181c(1)//mmu-miR-181d(1)	mmu-miR-181c-5p(1)//mmu-miR-181d-5p(1)	mmu-miR-181c(1)//mmu-miR-181d(1)		miR-181c-5p(1)//miR-181d-5p(1)	0.8	NA	NA	NA	NA	0	0.8
CLOCK	mmu-miR-181c-5p(1)//mmu-miR-181d-5p(1)	mmu-miR-181c(1)//mmu-miR-181d(1)	mmu-miR-181c-5p(1)//mmu-miR-181d-5p(1)	mmu-miR-181c(1)//mmu-miR-181d(1)		miR-181c-5p(1)//miR-181d-5p(1)	0.8	NA	NA	NA	NA	0	0.8
CNKSR3	mmu-miR-181c-5p(1)//mmu-miR-181d-5p(1)	mmu-miR-181c(2)//mmu-miR-181d(1)	mmu-miR-181c-5p(1)//mmu-miR-181d-5p(1)	mmu-miR-181c(1)//mmu-miR-181d(1)		miR-181c-5p(1)//miR-181d-5p(1)	0.8	NA	NA	NA	NA	0	0.8
CNOT2	mmu-miR-181c-5p(1)//mmu-miR-181d-5p(1)	mmu-miR-181c(2)//mmu-miR-181d(2)	mmu-miR-181c-5p(1)//mmu-miR-181d-5p(1)	mmu-miR-181c(1)//mmu-miR-181d(1)		miR-181c-5p(1)//miR-181d-5p(1)	0.8	NA	NA	NA	NA	0	0.8
CNR1	mmu-miR-181c-5p(1)//mmu-miR-181d-5p(1)	mmu-miR-181c(1)//mmu-miR-181d(1)	mmu-miR-181c-5p(1)//mmu-miR-181d-5p(1)	mmu-miR-181c(1)//mmu-miR-181d(1)		miR-181c-5p(1)//miR-181d-5p(1)	0.8	NA	NA	NA	NA	0	0.8
COL16A1	mmu-miR-181c-5p(1)//mmu-miR-181d-5p(1)	mmu-miR-181c(1)//mmu-miR-181d(1)	mmu-miR-181c-5p(1)//mmu-miR-181d-5p(1)	mmu-miR-181c(1)//mmu-miR-181d(1)		miR-181c-5p(1)//miR-181d-5p(1)	0.8	NA	NA	NA	NA	0	0.8
CPNE2	mmu-miR-181c-5p(1)//mmu-miR-181d-5p(1)	mmu-miR-181c(2)//mmu-miR-181d(2)	mmu-miR-181c-5p(1)//mmu-miR-181d-5p(1)	mmu-miR-181c(1)//mmu-miR-181d(1)		miR-181c-5p(1)//miR-181d-5p(1)	0.8	NA	NA	NA	NA	0	0.8
CSNK1G1	mmu-miR-181c-5p(1)//mmu-miR-181d-5p(1)	mmu-miR-181c(1)//mmu-miR-181d(1)	mmu-miR-181c-5p(1)//mmu-miR-181d-5p(1)	mmu-miR-181c(1)//mmu-miR-181d(1)		miR-181c-5p(1)//miR-181d-5p(1)	0.8	NA	NA	NA	NA	0	0.8
CTTNBP2NL	mmu-miR-181c-5p(1)//mmu-miR-181d-5p(1)	mmu-miR-181c(1)//mmu-miR-181d(1)	mmu-miR-181c-5p(1)//mmu-miR-181d-5p(1)	mmu-miR-181c(1)//mmu-miR-181d(1)		miR-181c-5p(1)//miR-181d-5p(1)	0.8	NA	NA	NA	NA	0	0.8
CXADR	mmu-miR-181c-5p(2)//mmu-miR-181d-5p(2)	mmu-miR-181c(2)//mmu-miR-181d(3)	mmu-miR-181c-5p(1)//mmu-miR-181d-5p(1)	mmu-miR-181c(1)//mmu-miR-181d(1)		miR-181c-5p(1)//miR-181d-5p(1)	0.8	NA	NA	NA	NA	0	0.8
D430041D05RIK	mmu-miR-181c-5p(1)//mmu-miR-181d-5p(1)	mmu-miR-181c(3)//mmu-miR-181d(3)	mmu-miR-181c-5p(1)//mmu-miR-181d-5p(1)	mmu-miR-181c(1)//mmu-miR-181d(1)		miR-181c-5p(1)//miR-181d-5p(1)	0.8	NA	NA	NA	NA	0	0.8
DAZAP2	mmu-miR-181c-5p(1)//mmu-miR-181d-5p(1)	mmu-miR-181c(1)//mmu-miR-181d(1)	mmu-miR-181c-5p(1)//mmu-miR-181d-5p(1)	mmu-miR-181c(1)//mmu-miR-181d(1)		miR-181c-5p(1)//miR-181d-5p(1)	0.8	NA	NA	NA	NA	0	0.8
DCUN1D1	mmu-miR-181c-5p(2)//mmu-miR-181d-5p(2)	mmu-miR-181c(1)//mmu-miR-181d(2)	mmu-miR-181c-5p(1)//mmu-miR-181d-5p(1)	mmu-miR-181c(1)//mmu-miR-181d(1)		miR-181c-5p(1)//miR-181d-5p(1)	0.8	NA	NA	NA	NA	0	0.8
DERL1	mmu-miR-181c-5p(1)//mmu-miR-181d-5p(1)	mmu-miR-181c(2)//mmu-miR-181d(2)	mmu-miR-181c-5p(1)//mmu-miR-181d-5p(1)	mmu-miR-181c(1)//mmu-miR-181d(1)		miR-181c-5p(1)//miR-181d-5p(1)	0.8	NA	NA	NA	NA	0	0.8
DLGAP2	mmu-miR-181c-5p(2)//mmu-miR-181d-5p(2)	mmu-miR-181c(1)//mmu-miR-181d(1)	mmu-miR-181c-5p(1)//mmu-miR-181d-5p(1)	mmu-miR-181c(1)//mmu-miR-181d(1)		miR-181c-5p(1)//miR-181d-5p(1)	0.8	NA	NA	NA	NA	0	0.8
DOCK4	mmu-miR-181c-5p(1)//mmu-miR-181d-5p(1)	mmu-miR-181c(3)//mmu-miR-181d(4)	mmu-miR-181c-5p(1)//mmu-miR-181d-5p(1)	mmu-miR-181c(1)//mmu-miR-181d(1)		miR-181c-5p(1)//miR-181d-5p(1)	0.8	NA	NA	NA	NA	0	0.8
DOCK7	mmu-miR-181c-5p(1)//mmu-miR-181d-5p(1)	mmu-miR-181c(1)//mmu-miR-181d(2)	mmu-miR-181c-5p(1)//mmu-miR-181d-5p(1)	mmu-miR-181c(1)//mmu-miR-181d(1)		miR-181c-5p(1)//miR-181d-5p(1)	0.8	NA	NA	NA	NA	0	0.8
DYNLL2	mmu-miR-181c-5p(1)//mmu-miR-181d-5p(1)	mmu-miR-181c(2)//mmu-miR-181d(2)	mmu-miR-181c-5p(1)//mmu-miR-181d-5p(1)	mmu-miR-181c(1)//mmu-miR-181d(1)		miR-181c-5p(1)//miR-181d-5p(1)	0.8	NA	NA	NA	NA	0	0.8
EED	mmu-miR-181c-5p(1)//mmu-miR-181d-5p(1)	mmu-miR-181c(1)//mmu-miR-181d(1)	mmu-miR-181c-5p(1)//mmu-miR-181d-5p(1)	mmu-miR-181c(1)//mmu-miR-181d(1)		miR-181c-5p(1)//miR-181d-5p(1)	0.8	NA	NA	NA	NA	0	0.8
ELAVL2	mmu-miR-181c-5p(1)//mmu-miR-181d-5p(1)	mmu-miR-181c(2)//mmu-miR-181d(2)	mmu-miR-181c-5p(1)//mmu-miR-181d-5p(1)	mmu-miR-181c(1)//mmu-miR-181d(1)	miR-181c-5p(1)//miR-181d-5p(1)		0.8	NA	NA	NA	NA	0	0.8
ELAVL4	mmu-miR-181c-5p(1)//mmu-miR-181d-5p(1)	mmu-miR-181c(2)//mmu-miR-181d(2)	mmu-miR-181c-5p(1)//mmu-miR-181d-5p(1)	mmu-miR-181c(1)//mmu-miR-181d(1)		miR-181c-5p(1)//miR-181d-5p(1)	0.8	NA	NA	NA	NA	0	0.8
ELP4	mmu-miR-181c-5p(1)//mmu-miR-181d-5p(1)	mmu-miR-181c(2)//mmu-miR-181d(3)	mmu-miR-181c-5p(1)//mmu-miR-181d-5p(1)	mmu-miR-181c(1)//mmu-miR-181d(1)		miR-181c-5p(1)//miR-181d-5p(1)	0.8	NA	NA	NA	NA	0	0.8
EPHA4	mmu-miR-181c-5p(2)//mmu-miR-181d-5p(2)	mmu-miR-181c(3)//mmu-miR-181d(4)	mmu-miR-181c-5p(1)//mmu-miR-181d-5p(1)	mmu-miR-181c(1)//mmu-miR-181d(1)		miR-181c-5p(1)//miR-181d-5p(1)	0.8	NA	NA	NA	NA	0	0.8
ESR1	mmu-miR-181c-5p(1)//mmu-miR-181d-5p(1)	mmu-miR-181c(1)//mmu-miR-181d(1)	mmu-miR-181c-5p(1)//mmu-miR-181d-5p(1)	mmu-miR-181c(1)//mmu-miR-181d(1)		miR-181c-5p(1)//miR-181d-5p(1)	0.8	NA	NA	NA	NA	0	0.8
FKTN	mmu-miR-181c-5p(1)//mmu-miR-181d-5p(1)	mmu-miR-181c(1)//mmu-miR-181d(1)	mmu-miR-181c-5p(1)//mmu-miR-181d-5p(1)	mmu-miR-181c(1)//mmu-miR-181d(1)		miR-181c-5p(1)//miR-181d-5p(1)	0.8	NA	NA	NA	NA	0	0.8
FMNL2	mmu-miR-181c-5p(1)//mmu-miR-181d-5p(1)	mmu-miR-181c(6)//mmu-miR-181d(9)	mmu-miR-181c-5p(1)//mmu-miR-181d-5p(1)	mmu-miR-181c(1)//mmu-miR-181d(1)		miR-181c-5p(1)//miR-181d-5p(1)	0.8	NA	NA	NA	NA	0	0.8
FRYL	mmu-miR-181c-5p(1)//mmu-miR-181d-5p(1)	mmu-miR-181c(1)//mmu-miR-181d(1)	mmu-miR-181c-5p(1)//mmu-miR-181d-5p(1)	mmu-miR-181c(1)//mmu-miR-181d(1)		miR-181c-5p(1)//miR-181d-5p(1)	0.8	NA	NA	NA	NA	0	0.8
GABRA1	mmu-miR-181c-5p(3)//mmu-miR-181d-5p(3)	mmu-miR-181c(2)//mmu-miR-181d(2)	mmu-miR-181c-5p(1)//mmu-miR-181d-5p(1)	mmu-miR-181c(1)//mmu-miR-181d(1)		miR-181c-5p(1)//miR-181d-5p(1)	0.8	NA	NA	NA	NA	0	0.8
GAPVD1	mmu-miR-181c-5p(1)//mmu-miR-181d-5p(1)	mmu-miR-181c(1)//mmu-miR-181d(1)	mmu-miR-181c-5p(1)//mmu-miR-181d-5p(1)	mmu-miR-181c(1)//mmu-miR-181d(1)		miR-181c-5p(1)//miR-181d-5p(1)	0.8	NA	NA	NA	NA	0	0.8
GDI1	mmu-miR-181c-5p(1)//mmu-miR-181d-5p(1)	mmu-miR-181c(1)//mmu-miR-181d(1)	mmu-miR-181c-5p(1)//mmu-miR-181d-5p(1)	mmu-miR-181c(1)//mmu-miR-181d(1)		miR-181c-5p(1)//miR-181d-5p(1)	0.8	NA	NA	NA	NA	0	0.8
GNG2	mmu-miR-181c-5p(1)//mmu-miR-181d-5p(1)	mmu-miR-181c(1)//mmu-miR-181d(1)	mmu-miR-181c-5p(1)//mmu-miR-181d-5p(1)	mmu-miR-181c(1)//mmu-miR-181d(1)		miR-181c-5p(1)//miR-181d-5p(1)	0.8	NA	NA	NA	NA	0	0.8
GOLGA1	mmu-miR-181c-5p(1)//mmu-miR-181d-5p(1)	mmu-miR-181c(2)//mmu-miR-181d(2)	mmu-miR-181c-5p(1)//mmu-miR-181d-5p(1)	mmu-miR-181c(1)//mmu-miR-181d(1)		miR-181c-5p(1)//miR-181d-5p(1)	0.8	NA	NA	NA	NA	0	0.8
GPR22	mmu-miR-181c-5p(1)//mmu-miR-181d-5p(1)	mmu-miR-181c(4)//mmu-miR-181d(4)	mmu-miR-181c-5p(1)//mmu-miR-181d-5p(1)	mmu-miR-181c(1)//mmu-miR-181d(1)		miR-181c-5p(1)//miR-181d-5p(1)	0.8	NA	NA	NA	NA	0	0.8
GPSM1	mmu-miR-181c-5p(1)//mmu-miR-181d-5p(1)	mmu-miR-181c(1)//mmu-miR-181d(1)	mmu-miR-181c-5p(1)//mmu-miR-181d-5p(1)	mmu-miR-181c(1)//mmu-miR-181d(1)		miR-181c-5p(1)//miR-181d-5p(1)	0.8	NA	NA	NA	NA	0	0.8
GRB10	mmu-miR-181c-5p(1)//mmu-miR-181d-5p(1)	mmu-miR-181c(2)//mmu-miR-181d(3)	mmu-miR-181c-5p(1)//mmu-miR-181d-5p(1)	mmu-miR-181c(1)//mmu-miR-181d(1)		miR-181c-5p(1)//miR-181d-5p(1)	0.8	NA	NA	NA	NA	0	0.8
GRIA2	mmu-miR-181c-5p(1)//mmu-miR-181d-5p(1)	mmu-miR-181c(4)//mmu-miR-181d(6)	mmu-miR-181c-5p(1)//mmu-miR-181d-5p(1)	mmu-miR-181c(2)//mmu-miR-181d(2)		miR-181c-5p(1)//miR-181d-5p(1)	0.8	NA	NA	NA	NA	0	0.8
GRM5	mmu-miR-181c-5p(1)//mmu-miR-181d-5p(1)	mmu-miR-181c(1)//mmu-miR-181d(1)	mmu-miR-181c-5p(1)//mmu-miR-181d-5p(1)	mmu-miR-181c(1)//mmu-miR-181d(1)		miR-181c-5p(1)//miR-181d-5p(1)	0.8	NA	NA	NA	NA	0	0.8
HCN2	mmu-miR-181c-5p(1)//mmu-miR-181d-5p(1)	mmu-miR-181c(1)//mmu-miR-181d(1)	mmu-miR-181c-5p(1)//mmu-miR-181d-5p(1)	mmu-miR-181c(1)//mmu-miR-181d(1)		miR-181c-5p(1)//miR-181d-5p(1)	0.8	NA	NA	NA	NA	0	0.8
HIC2	mmu-miR-181c-5p(3)//mmu-miR-181d-5p(3)	mmu-miR-181c(1)//mmu-miR-181d(1)	mmu-miR-181c-5p(1)//mmu-miR-181d-5p(1)	mmu-miR-181c(3)//mmu-miR-181d(3)		miR-181c-5p(1)//miR-181d-5p(1)	0.8	NA	NA	NA	NA	0	0.8
HLF	mmu-miR-181c-5p(1)//mmu-miR-181d-5p(1)	mmu-miR-181c(2)//mmu-miR-181d(2)	mmu-miR-181c-5p(1)//mmu-miR-181d-5p(1)	mmu-miR-181c(1)//mmu-miR-181d(1)		miR-181c-5p(1)//miR-181d-5p(1)	0.8	NA	NA	NA	NA	0	0.8
HMBOX1	mmu-miR-181c-5p(1)//mmu-miR-181d-5p(1)	mmu-miR-181c(1)//mmu-miR-181d(3)	mmu-miR-181c-5p(1)//mmu-miR-181d-5p(1)	mmu-miR-181c(1)//mmu-miR-181d(1)		miR-181c-5p(1)//miR-181d-5p(1)	0.8	NA	NA	NA	NA	0	0.8
HOXA1	mmu-miR-181c-5p(1)//mmu-miR-181d-5p(1)	mmu-miR-181c(2)//mmu-miR-181d(2)	mmu-miR-181c-5p(1)//mmu-miR-181d-5p(1)	mmu-miR-181c(1)//mmu-miR-181d(1)		miR-181c-5p(1)//miR-181d-5p(1)	0.8	NA	NA	NA	NA	0	0.8
IGF2BP2	mmu-miR-181c-5p(1)//mmu-miR-181d-5p(1)	mmu-miR-181c(1)//mmu-miR-181d(1)	mmu-miR-181c-5p(1)//mmu-miR-181d-5p(1)	mmu-miR-181c(1)//mmu-miR-181d(1)		miR-181c-5p(1)//miR-181d-5p(1)	0.8	NA	NA	NA	NA	0	0.8
IGSF11	mmu-miR-181c-5p(1)//mmu-miR-181d-5p(1)	mmu-miR-181c(1)//mmu-miR-181d(2)	mmu-miR-181c-5p(1)//mmu-miR-181d-5p(1)	mmu-miR-181c(1)//mmu-miR-181d(1)		miR-181c-5p(1)//miR-181d-5p(1)	0.8	NA	NA	NA	NA	0	0.8
IPMK	mmu-miR-181c-5p(1)//mmu-miR-181d-5p(1)	mmu-miR-181c(1)//mmu-miR-181d(1)	mmu-miR-181c-5p(1)//mmu-miR-181d-5p(1)	mmu-miR-181c(1)//mmu-miR-181d(1)		miR-181c-5p(1)//miR-181d-5p(1)	0.8	NA	NA	NA	NA	0	0.8
IPO8	mmu-miR-181c-5p(1)//mmu-miR-181d-5p(1)	mmu-miR-181c(3)//mmu-miR-181d(3)	mmu-miR-181c-5p(1)//mmu-miR-181d-5p(1)	mmu-miR-181c(1)//mmu-miR-181d(1)		miR-181c-5p(1)//miR-181d-5p(1)	0.8	NA	NA	NA	NA	0	0.8
ITGA1	mmu-miR-181c-5p(1)//mmu-miR-181d-5p(1)	mmu-miR-181c(2)//mmu-miR-181d(2)	mmu-miR-181c-5p(1)//mmu-miR-181d-5p(1)	mmu-miR-181c(1)//mmu-miR-181d(1)		miR-181c-5p(1)//miR-181d-5p(1)	0.8	NA	NA	NA	NA	0	0.8
ITGA3	mmu-miR-181c-5p(1)//mmu-miR-181d-5p(1)	mmu-miR-181c(2)//mmu-miR-181d(2)	mmu-miR-181c-5p(1)//mmu-miR-181d-5p(1)	mmu-miR-181c(1)//mmu-miR-181d(1)		miR-181c-5p(1)//miR-181d-5p(1)	0.8	NA	NA	NA	NA	0	0.8
ITSN1	mmu-miR-181c-5p(2)//mmu-miR-181d-5p(2)	mmu-miR-181c(2)//mmu-miR-181d(2)	mmu-miR-181c-5p(1)//mmu-miR-181d-5p(1)	mmu-miR-181c(1)//mmu-miR-181d(1)		miR-181c-5p(1)//miR-181d-5p(1)	0.8	NA	NA	NA	NA	0	0.8
KANK1	mmu-miR-181c-5p(1)//mmu-miR-181d-5p(1)	mmu-miR-181c(1)//mmu-miR-181d(1)	mmu-miR-181c-5p(1)//mmu-miR-181d-5p(1)	mmu-miR-181c(1)//mmu-miR-181d(1)		miR-181c-5p(1)//miR-181d-5p(1)	0.8	NA	NA	NA	NA	0	0.8
KCNA4	mmu-miR-181c-5p(1)//mmu-miR-181d-5p(1)	mmu-miR-181c(1)//mmu-miR-181d(1)	mmu-miR-181c-5p(1)//mmu-miR-181d-5p(1)	mmu-miR-181c(1)//mmu-miR-181d(1)		miR-181c-5p(1)//miR-181d-5p(1)	0.8	NA	NA	NA	NA	0	0.8
KCNH1	mmu-miR-181c-5p(1)//mmu-miR-181d-5p(1)	mmu-miR-181c(1)//mmu-miR-181d(1)	mmu-miR-181c-5p(1)//mmu-miR-181d-5p(1)	mmu-miR-181c(1)//mmu-miR-181d(1)		miR-181c-5p(1)//miR-181d-5p(1)	0.8	NA	NA	NA	NA	0	0.8
KLHL2	mmu-miR-181c-5p(1)//mmu-miR-181d-5p(1)	mmu-miR-181c(2)//mmu-miR-181d(2)	mmu-miR-181c-5p(1)//mmu-miR-181d-5p(1)	mmu-miR-181c(1)//mmu-miR-181d(1)		miR-181c-5p(1)//miR-181d-5p(1)	0.8	NA	NA	NA	NA	0	0.8
KPNA1	mmu-miR-181c-5p(1)//mmu-miR-181d-5p(1)	mmu-miR-181c(4)//mmu-miR-181d(4)	mmu-miR-181c-5p(1)//mmu-miR-181d-5p(1)	mmu-miR-181c(2)//mmu-miR-181d(2)		miR-181c-5p(1)//miR-181d-5p(1)	0.8	NA	NA	NA	NA	0	0.8
LEMD3	mmu-miR-181c-5p(1)//mmu-miR-181d-5p(1)	mmu-miR-181c(1)//mmu-miR-181d(1)	mmu-miR-181c-5p(1)//mmu-miR-181d-5p(1)	mmu-miR-181c(1)//mmu-miR-181d(1)		miR-181c-5p(1)//miR-181d-5p(1)	0.8	NA	NA	NA	NA	0	0.8
LMBRD2	mmu-miR-181c-5p(1)//mmu-miR-181d-5p(1)	mmu-miR-181c(1)//mmu-miR-181d(1)	mmu-miR-181c-5p(1)//mmu-miR-181d-5p(1)	mmu-miR-181c(1)//mmu-miR-181d(1)		miR-181c-5p(1)//miR-181d-5p(1)	0.8	NA	NA	NA	NA	0	0.8
LMO3	mmu-miR-181c-5p(1)//mmu-miR-181d-5p(1)	mmu-miR-181c(1)//mmu-miR-181d(1)	mmu-miR-181c-5p(1)//mmu-miR-181d-5p(1)	mmu-miR-181c(1)//mmu-miR-181d(1)		miR-181c-5p(1)//miR-181d-5p(1)	0.8	NA	NA	NA	NA	0	0.8
LRBA	mmu-miR-181c-5p(1)//mmu-miR-181d-5p(1)	mmu-miR-181c(1)//mmu-miR-181d(2)	mmu-miR-181c-5p(1)//mmu-miR-181d-5p(1)	mmu-miR-181c(1)//mmu-miR-181d(1)		miR-181c-5p(1)//miR-181d-5p(1)	0.8	NA	NA	NA	NA	0	0.8
LRP12	mmu-miR-181c-5p(1)//mmu-miR-181d-5p(1)	mmu-miR-181c(2)//mmu-miR-181d(1)	mmu-miR-181c-5p(1)//mmu-miR-181d-5p(1)	mmu-miR-181c(1)//mmu-miR-181d(1)		miR-181c-5p(1)//miR-181d-5p(1)	0.8	NA	NA	NA	NA	0	0.8
MAMDC2	mmu-miR-181c-5p(1)//mmu-miR-181d-5p(1)	mmu-miR-181c(1)//mmu-miR-181d(1)	mmu-miR-181c-5p(1)//mmu-miR-181d-5p(1)	mmu-miR-181c(1)//mmu-miR-181d(1)		miR-181c-5p(1)//miR-181d-5p(1)	0.8	NA	NA	NA	NA	0	0.8
MAPT	mmu-miR-181c-5p(1)//mmu-miR-181d-5p(1)	mmu-miR-181c(1)//mmu-miR-181d(1)	mmu-miR-181c-5p(1)//mmu-miR-181d-5p(1)	mmu-miR-181c(1)//mmu-miR-181d(1)		miR-181c-5p(1)//miR-181d-5p(1)	0.8	NA	NA	NA	NA	0	0.8
MBNL2	mmu-miR-181c-5p(1)//mmu-miR-181d-5p(1)	mmu-miR-181c(2)//mmu-miR-181d(2)	mmu-miR-181c-5p(1)//mmu-miR-181d-5p(1)	mmu-miR-181c(1)//mmu-miR-181d(1)		miR-181c-5p(1)//miR-181d-5p(1)	0.8	NA	NA	NA	NA	0	0.8
MCC	mmu-miR-181c-5p(1)//mmu-miR-181d-5p(1)	mmu-miR-181c(1)//mmu-miR-181d(1)	mmu-miR-181c-5p(1)//mmu-miR-181d-5p(1)	mmu-miR-181c(1)//mmu-miR-181d(1)		miR-181c-5p(1)//miR-181d-5p(1)	0.8	NA	NA	NA	NA	0	0.8
MED8	mmu-miR-181c-5p(1)//mmu-miR-181d-5p(1)	mmu-miR-181c(1)//mmu-miR-181d(1)	mmu-miR-181c-5p(1)//mmu-miR-181d-5p(1)	mmu-miR-181c(1)//mmu-miR-181d(1)		miR-181c-5p(1)//miR-181d-5p(1)	0.8	NA	NA	NA	NA	0	0.8
MMP14	mmu-miR-181c-5p(1)//mmu-miR-181d-5p(1)	mmu-miR-181c(1)//mmu-miR-181d(1)	mmu-miR-181c-5p(1)//mmu-miR-181d-5p(1)	mmu-miR-181c(1)//mmu-miR-181d(1)		miR-181c-5p(1)//miR-181d-5p(1)	0.8	NA	NA	NA	NA	0	0.8
MOSPD1	mmu-miR-181c-5p(1)//mmu-miR-181d-5p(1)	mmu-miR-181c(2)//mmu-miR-181d(2)	mmu-miR-181c-5p(1)//mmu-miR-181d-5p(1)	mmu-miR-181c(1)//mmu-miR-181d(1)		miR-181c-5p(1)//miR-181d-5p(1)	0.8	NA	NA	NA	NA	0	0.8
MTMR12	mmu-miR-181c-5p(1)//mmu-miR-181d-5p(1)	mmu-miR-181c(3)//mmu-miR-181d(2)	mmu-miR-181c-5p(1)//mmu-miR-181d-5p(1)	mmu-miR-181c(1)//mmu-miR-181d(1)		miR-181c-5p(1)//miR-181d-5p(1)	0.8	NA	NA	NA	NA	0	0.8
NEGR1	mmu-miR-181c-5p(1)//mmu-miR-181d-5p(1)	mmu-miR-181c(2)//mmu-miR-181d(3)	mmu-miR-181c-5p(1)//mmu-miR-181d-5p(1)	mmu-miR-181c(1)//mmu-miR-181d(1)		miR-181c-5p(1)//miR-181d-5p(1)	0.8	NA	NA	NA	NA	0	0.8
NLK	mmu-miR-181c-5p(1)//mmu-miR-181d-5p(1)	mmu-miR-181c(1)//mmu-miR-181d(2)	mmu-miR-181c-5p(1)//mmu-miR-181d-5p(1)	mmu-miR-181c(1)//mmu-miR-181d(1)		miR-181c-5p(1)//miR-181d-5p(1)	0.8	NA	NA	NA	NA	0	0.8
NOL4	mmu-miR-181c-5p(1)//mmu-miR-181d-5p(1)	mmu-miR-181c(2)//mmu-miR-181d(2)	mmu-miR-181c-5p(1)//mmu-miR-181d-5p(1)	mmu-miR-181c(1)//mmu-miR-181d(1)		miR-181c-5p(1)//miR-181d-5p(1)	0.8	NA	NA	NA	NA	0	0.8
NPEPPS	mmu-miR-181c-5p(1)//mmu-miR-181d-5p(1)	mmu-miR-181c(1)//mmu-miR-181d(1)	mmu-miR-181c-5p(1)//mmu-miR-181d-5p(1)	mmu-miR-181c(1)//mmu-miR-181d(1)		miR-181c-5p(1)//miR-181d-5p(1)	0.8	NA	NA	NA	NA	0	0.8
NR1D2	mmu-miR-181c-5p(2)//mmu-miR-181d-5p(2)	mmu-miR-181c(1)//mmu-miR-181d(2)	mmu-miR-181c-5p(1)//mmu-miR-181d-5p(1)	mmu-miR-181c(1)//mmu-miR-181d(1)		miR-181c-5p(1)//miR-181d-5p(1)	0.8	NA	NA	NA	NA	0	0.8
NRXN1	mmu-miR-181c-5p(1)//mmu-miR-181d-5p(1)	mmu-miR-181c(4)//mmu-miR-181d(5)	mmu-miR-181c-5p(1)//mmu-miR-181d-5p(1)	mmu-miR-181c(1)//mmu-miR-181d(1)		miR-181c-5p(1)//miR-181d-5p(1)	0.8	NA	NA	NA	NA	0	0.8
NSMAF	mmu-miR-181c-5p(1)//mmu-miR-181d-5p(1)	mmu-miR-181c(1)//mmu-miR-181d(2)	mmu-miR-181c-5p(1)//mmu-miR-181d-5p(1)	mmu-miR-181c(1)//mmu-miR-181d(1)		miR-181c-5p(1)//miR-181d-5p(1)	0.8	NA	NA	NA	NA	0	0.8
PACS2	mmu-miR-181c-5p(1)//mmu-miR-181d-5p(1)	mmu-miR-181c(2)//mmu-miR-181d(2)	mmu-miR-181c-5p(1)//mmu-miR-181d-5p(1)	mmu-miR-181c(1)//mmu-miR-181d(1)		miR-181c-5p(1)//miR-181d-5p(1)	0.8	NA	NA	NA	NA	0	0.8
PAK4	mmu-miR-181c-5p(1)//mmu-miR-181d-5p(1)	mmu-miR-181c(1)//mmu-miR-181d(1)	mmu-miR-181c-5p(1)//mmu-miR-181d-5p(1)	mmu-miR-181c(1)//mmu-miR-181d(1)		miR-181c-5p(1)//miR-181d-5p(1)	0.8	NA	NA	NA	NA	0	0.8
PAX9	mmu-miR-181c-5p(1)//mmu-miR-181d-5p(1)	mmu-miR-181c(1)//mmu-miR-181d(1)	mmu-miR-181c-5p(1)//mmu-miR-181d-5p(1)	mmu-miR-181c(1)//mmu-miR-181d(1)		miR-181c-5p(1)//miR-181d-5p(1)	0.8	NA	NA	NA	NA	0	0.8
PBX1	mmu-miR-181c-5p(1)//mmu-miR-181d-5p(1)	mmu-miR-181c(4)//mmu-miR-181d(5)	mmu-miR-181c-5p(1)//mmu-miR-181d-5p(1)	mmu-miR-181c(1)//mmu-miR-181d(1)		miR-181c-5p(1)//miR-181d-5p(1)	0.8	NA	NA	NA	NA	0	0.8
PDAP1	mmu-miR-181c-5p(1)//mmu-miR-181d-5p(1)	mmu-miR-181c(1)//mmu-miR-181d(1)	mmu-miR-181c-5p(1)//mmu-miR-181d-5p(1)	mmu-miR-181c(1)//mmu-miR-181d(1)		miR-181c-5p(1)//miR-181d-5p(1)	0.8	NA	NA	NA	NA	0	0.8
PDGFRA	mmu-miR-181c-5p(1)//mmu-miR-181d-5p(1)	mmu-miR-181c(1)//mmu-miR-181d(1)	mmu-miR-181c-5p(1)//mmu-miR-181d-5p(1)	mmu-miR-181c(1)//mmu-miR-181d(1)		miR-181c-5p(1)//miR-181d-5p(1)	0.8	NA	NA	NA	NA	0	0.8
PDIK1L	mmu-miR-181c-5p(1)//mmu-miR-181d-5p(1)	mmu-miR-181c(3)//mmu-miR-181d(2)	mmu-miR-181c-5p(1)//mmu-miR-181d-5p(1)	mmu-miR-181c(2)//mmu-miR-181d(2)		miR-181c-5p(1)//miR-181d-5p(1)	0.8	NA	NA	NA	NA	0	0.8
PHACTR1	mmu-miR-181c-5p(1)//mmu-miR-181d-5p(1)	mmu-miR-181c(2)//mmu-miR-181d(2)	mmu-miR-181c-5p(1)//mmu-miR-181d-5p(1)	mmu-miR-181c(1)//mmu-miR-181d(1)		miR-181c-5p(1)//miR-181d-5p(1)	0.8	NA	NA	NA	NA	0	0.8
PHACTR2	mmu-miR-181c-5p(1)//mmu-miR-181d-5p(1)	mmu-miR-181c(1)//mmu-miR-181d(1)	mmu-miR-181c-5p(1)//mmu-miR-181d-5p(1)	mmu-miR-181c(1)//mmu-miR-181d(1)		miR-181c-5p(1)//miR-181d-5p(1)	0.8	NA	NA	NA	NA	0	0.8
PHF20L1	mmu-miR-181c-5p(2)//mmu-miR-181d-5p(2)	mmu-miR-181c(2)//mmu-miR-181d(2)	mmu-miR-181c-5p(1)//mmu-miR-181d-5p(1)	mmu-miR-181c(1)//mmu-miR-181d(1)		miR-181c-5p(1)//miR-181d-5p(1)	0.8	NA	NA	NA	NA	0	0.8
PHLDA1	mmu-miR-181c-5p(1)//mmu-miR-181d-5p(1)	mmu-miR-181c(1)//mmu-miR-181d(1)	mmu-miR-181c-5p(1)//mmu-miR-181d-5p(1)	mmu-miR-181c(1)//mmu-miR-181d(1)		miR-181c-5p(1)//miR-181d-5p(1)	0.8	NA	NA	NA	NA	0	0.8
PHOX2B	mmu-miR-181c-5p(1)//mmu-miR-181d-5p(1)	mmu-miR-181c(2)//mmu-miR-181d(2)	mmu-miR-181c-5p(1)//mmu-miR-181d-5p(1)	mmu-miR-181c(1)//mmu-miR-181d(1)		miR-181c-5p(1)//miR-181d-5p(1)	0.8	NA	NA	NA	NA	0	0.8
PI4K2B	mmu-miR-181c-5p(1)//mmu-miR-181d-5p(1)	mmu-miR-181c(2)//mmu-miR-181d(2)	mmu-miR-181c-5p(1)//mmu-miR-181d-5p(1)	mmu-miR-181c(1)//mmu-miR-181d(1)		miR-181c-5p(1)//miR-181d-5p(1)	0.8	NA	NA	NA	NA	0	0.8
PIAS3	mmu-miR-181c-5p(1)//mmu-miR-181d-5p(1)	mmu-miR-181c(1)//mmu-miR-181d(1)	mmu-miR-181c-5p(1)//mmu-miR-181d-5p(1)	mmu-miR-181c(1)//mmu-miR-181d(1)		miR-181c-5p(1)//miR-181d-5p(1)	0.8	NA	NA	NA	NA	0	0.8
PLXNC1	mmu-miR-181c-5p(1)//mmu-miR-181d-5p(1)	mmu-miR-181c(1)//mmu-miR-181d(1)	mmu-miR-181c-5p(1)//mmu-miR-181d-5p(1)	mmu-miR-181c(1)//mmu-miR-181d(1)		miR-181c-5p(1)//miR-181d-5p(1)	0.8	NA	NA	NA	NA	0	0.8
POM121	mmu-miR-181c-5p(1)//mmu-miR-181d-5p(1)	mmu-miR-181c(2)//mmu-miR-181d(2)	mmu-miR-181c-5p(1)//mmu-miR-181d-5p(1)	mmu-miR-181c(1)//mmu-miR-181d(1)		miR-181c-5p(1)//miR-181d-5p(1)	0.8	NA	NA	NA	NA	0	0.8
PRDM4	mmu-miR-181c-5p(1)//mmu-miR-181d-5p(1)	mmu-miR-181c(1)//mmu-miR-181d(1)	mmu-miR-181c-5p(1)//mmu-miR-181d-5p(1)	mmu-miR-181c(1)//mmu-miR-181d(1)		miR-181c-5p(1)//miR-181d-5p(1)	0.8	NA	NA	NA	NA	0	0.8
PTBP2	mmu-miR-181c-5p(1)//mmu-miR-181d-5p(1)	mmu-miR-181c(2)//mmu-miR-181d(2)	mmu-miR-181c-5p(1)//mmu-miR-181d-5p(1)	mmu-miR-181c(1)//mmu-miR-181d(1)		miR-181c-5p(1)//miR-181d-5p(1)	0.8	NA	NA	NA	NA	0	0.8
PTPN9	mmu-miR-181c-5p(1)//mmu-miR-181d-5p(1)	mmu-miR-181c(1)//mmu-miR-181d(1)	mmu-miR-181c-5p(1)//mmu-miR-181d-5p(1)	mmu-miR-181c(1)//mmu-miR-181d(1)		miR-181c-5p(1)//miR-181d-5p(1)	0.8	NA	NA	NA	NA	0	0.8
RAD23B	mmu-miR-181c-5p(1)//mmu-miR-181d-5p(1)	mmu-miR-181c(2)//mmu-miR-181d(2)	mmu-miR-181c-5p(1)//mmu-miR-181d-5p(1)	mmu-miR-181c(1)//mmu-miR-181d(1)		miR-181c-5p(1)//miR-181d-5p(1)	0.8	NA	NA	NA	NA	0	0.8
RALA	mmu-miR-181c-5p(1)//mmu-miR-181d-5p(1)	mmu-miR-181c(1)//mmu-miR-181d(1)	mmu-miR-181c-5p(1)//mmu-miR-181d-5p(1)	mmu-miR-181c(1)//mmu-miR-181d(1)		miR-181c-5p(1)//miR-181d-5p(1)	0.8	NA	NA	NA	NA	0	0.8
RASSF1	mmu-miR-181c-5p(1)//mmu-miR-181d-5p(1)	mmu-miR-181c(2)//mmu-miR-181d(2)	mmu-miR-181c-5p(1)//mmu-miR-181d-5p(1)	mmu-miR-181c(1)//mmu-miR-181d(1)		miR-181c-5p(1)//miR-181d-5p(1)	0.8	NA	NA	NA	NA	0	0.8
RASSF8	mmu-miR-181c-5p(1)//mmu-miR-181d-5p(1)	mmu-miR-181c(2)//mmu-miR-181d(2)	mmu-miR-181c-5p(1)//mmu-miR-181d-5p(1)	mmu-miR-181c(1)//mmu-miR-181d(1)		miR-181c-5p(1)//miR-181d-5p(1)	0.8	NA	NA	NA	NA	0	0.8
RBM25	mmu-miR-181c-5p(1)//mmu-miR-181d-5p(1)	mmu-miR-181c(5)//mmu-miR-181d(5)	mmu-miR-181c-5p(1)//mmu-miR-181d-5p(1)	mmu-miR-181c(1)//mmu-miR-181d(1)		miR-181c-5p(1)//miR-181d-5p(1)	0.8	NA	NA	NA	NA	0	0.8
RIN2	mmu-miR-181c-5p(1)//mmu-miR-181d-5p(1)	mmu-miR-181c(2)//mmu-miR-181d(3)	mmu-miR-181c-5p(1)//mmu-miR-181d-5p(1)	mmu-miR-181c(1)//mmu-miR-181d(1)		miR-181c-5p(1)//miR-181d-5p(1)	0.8	NA	NA	NA	NA	0	0.8
RNF145	mmu-miR-181c-5p(1)//mmu-miR-181d-5p(1)	mmu-miR-181c(3)//mmu-miR-181d(3)	mmu-miR-181c-5p(1)//mmu-miR-181d-5p(1)	mmu-miR-181c(1)//mmu-miR-181d(1)		miR-181c-5p(1)//miR-181d-5p(1)	0.8	NA	NA	NA	NA	0	0.8
RNF34	mmu-miR-181c-5p(2)//mmu-miR-181d-5p(2)	mmu-miR-181c(2)//mmu-miR-181d(2)	mmu-miR-181c-5p(1)//mmu-miR-181d-5p(1)	mmu-miR-181c(1)//mmu-miR-181d(1)		miR-181c-5p(1)//miR-181d-5p(1)	0.8	NA	NA	NA	NA	0	0.8
ROBO2	mmu-miR-181c-5p(1)//mmu-miR-181d-5p(1)	mmu-miR-181c(2)//mmu-miR-181d(2)	mmu-miR-181c-5p(1)//mmu-miR-181d-5p(1)	mmu-miR-181c(1)//mmu-miR-181d(1)		miR-181c-5p(1)//miR-181d-5p(1)	0.8	NA	NA	NA	NA	0	0.8
RSBN1	mmu-miR-181c-5p(1)//mmu-miR-181d-5p(1)	mmu-miR-181c(1)//mmu-miR-181d(3)	mmu-miR-181c-5p(1)//mmu-miR-181d-5p(1)	mmu-miR-181c(1)//mmu-miR-181d(1)		miR-181c-5p(1)//miR-181d-5p(1)	0.8	NA	NA	NA	NA	0	0.8
RSPO2	mmu-miR-181c-5p(1)//mmu-miR-181d-5p(1)	mmu-miR-181c(1)//mmu-miR-181d(1)	mmu-miR-181c-5p(1)//mmu-miR-181d-5p(1)	mmu-miR-181c(1)//mmu-miR-181d(1)		miR-181c-5p(1)//miR-181d-5p(1)	0.8	NA	NA	NA	NA	0	0.8
RUNX1	mmu-miR-181c-5p(1)//mmu-miR-181d-5p(1)	mmu-miR-181c(1)//mmu-miR-181d(1)	mmu-miR-181c-5p(1)//mmu-miR-181d-5p(1)	mmu-miR-181c(1)//mmu-miR-181d(1)		miR-181c-5p(1)//miR-181d-5p(1)	0.8	NA	NA	NA	NA	0	0.8
SCHIP1	mmu-miR-181c-5p(1)//mmu-miR-181d-5p(1)	mmu-miR-181c(1)//mmu-miR-181d(1)	mmu-miR-181c-5p(1)//mmu-miR-181d-5p(1)	mmu-miR-181c(1)//mmu-miR-181d(1)		miR-181c-5p(1)//miR-181d-5p(1)	0.8	NA	NA	NA	NA	0	0.8
SEMA4F	mmu-miR-181c-5p(1)//mmu-miR-181d-5p(1)	mmu-miR-181c(2)//mmu-miR-181d(2)	mmu-miR-181c-5p(1)//mmu-miR-181d-5p(1)	mmu-miR-181c(1)//mmu-miR-181d(1)		miR-181c-5p(1)//miR-181d-5p(1)	0.8	NA	NA	NA	NA	0	0.8
SEMA4G	mmu-miR-181c-5p(1)//mmu-miR-181d-5p(1)	mmu-miR-181c(1)//mmu-miR-181d(1)	mmu-miR-181c-5p(1)//mmu-miR-181d-5p(1)	mmu-miR-181c(1)//mmu-miR-181d(1)		miR-181c-5p(1)//miR-181d-5p(1)	0.8	NA	NA	NA	NA	0	0.8
SENP1	mmu-miR-181c-5p(2)//mmu-miR-181d-5p(2)	mmu-miR-181c(1)//mmu-miR-181d(2)	mmu-miR-181c-5p(1)//mmu-miR-181d-5p(1)	mmu-miR-181c(2)//mmu-miR-181d(2)		miR-181c-5p(1)//miR-181d-5p(1)	0.8	NA	NA	NA	NA	0	0.8
SEPT3	mmu-miR-181c-5p(1)//mmu-miR-181d-5p(1)	mmu-miR-181c(1)//mmu-miR-181d(1)	mmu-miR-181c-5p(1)//mmu-miR-181d-5p(1)	mmu-miR-181c(1)//mmu-miR-181d(1)		miR-181c-5p(1)//miR-181d-5p(1)	0.8	NA	NA	NA	NA	0	0.8
SEPT8	mmu-miR-181c-5p(1)//mmu-miR-181d-5p(1)	mmu-miR-181c(2)//mmu-miR-181d(2)	mmu-miR-181c-5p(1)//mmu-miR-181d-5p(1)	mmu-miR-181c(1)//mmu-miR-181d(1)		miR-181c-5p(1)//miR-181d-5p(1)	0.8	NA	NA	NA	NA	0	0.8
SHOC2	mmu-miR-181c-5p(1)//mmu-miR-181d-5p(1)	mmu-miR-181c(1)//mmu-miR-181d(1)	mmu-miR-181c-5p(1)//mmu-miR-181d-5p(1)	mmu-miR-181c(1)//mmu-miR-181d(1)		miR-181c-5p(1)//miR-181d-5p(1)	0.8	NA	NA	NA	NA	0	0.8
SLC25A37	mmu-miR-181c-5p(1)//mmu-miR-181d-5p(1)	mmu-miR-181c(1)//mmu-miR-181d(1)	mmu-miR-181c-5p(1)//mmu-miR-181d-5p(1)	mmu-miR-181c(1)//mmu-miR-181d(1)		miR-181c-5p(1)//miR-181d-5p(1)	0.8	NA	NA	NA	NA	0	0.8
SLC35F3	mmu-miR-181c-5p(1)//mmu-miR-181d-5p(1)	mmu-miR-181c(1)//mmu-miR-181d(1)	mmu-miR-181c-5p(1)//mmu-miR-181d-5p(1)	mmu-miR-181c(1)//mmu-miR-181d(1)		miR-181c-5p(1)//miR-181d-5p(1)	0.8	NA	NA	NA	NA	0	0.8
SLC4A10	mmu-miR-181c-5p(1)//mmu-miR-181d-5p(1)	mmu-miR-181c(1)//mmu-miR-181d(1)	mmu-miR-181c-5p(1)//mmu-miR-181d-5p(1)	mmu-miR-181c(1)//mmu-miR-181d(1)		miR-181c-5p(1)//miR-181d-5p(1)	0.8	NA	NA	NA	NA	0	0.8
SNN	mmu-miR-181c-5p(1)//mmu-miR-181d-5p(1)	mmu-miR-181c(1)//mmu-miR-181d(1)	mmu-miR-181c-5p(1)//mmu-miR-181d-5p(1)	mmu-miR-181c(1)//mmu-miR-181d(1)		miR-181c-5p(1)//miR-181d-5p(1)	0.8	NA	NA	NA	NA	0	0.8
SOS1	mmu-miR-181c-5p(1)//mmu-miR-181d-5p(1)	mmu-miR-181c(2)//mmu-miR-181d(4)	mmu-miR-181c-5p(1)//mmu-miR-181d-5p(1)	mmu-miR-181c(1)//mmu-miR-181d(1)		miR-181c-5p(1)//miR-181d-5p(1)	0.8	NA	NA	NA	NA	0	0.8
SOX5	mmu-miR-181c-5p(1)//mmu-miR-181d-5p(1)	mmu-miR-181c(1)//mmu-miR-181d(1)	mmu-miR-181c-5p(1)//mmu-miR-181d-5p(1)	mmu-miR-181c(1)//mmu-miR-181d(1)		miR-181c-5p(1)//miR-181d-5p(1)	0.8	NA	NA	NA	NA	0	0.8
SOX6	mmu-miR-181c-5p(1)//mmu-miR-181d-5p(1)	mmu-miR-181c(1)//mmu-miR-181d(2)	mmu-miR-181c-5p(1)//mmu-miR-181d-5p(1)	mmu-miR-181c(2)//mmu-miR-181d(2)		miR-181c-5p(1)//miR-181d-5p(1)	0.8	NA	NA	NA	NA	0	0.8
SPRY4	mmu-miR-181c-5p(2)//mmu-miR-181d-5p(2)	mmu-miR-181c(2)//mmu-miR-181d(2)	mmu-miR-181c-5p(1)//mmu-miR-181d-5p(1)	mmu-miR-181c(2)//mmu-miR-181d(2)		miR-181c-5p(1)//miR-181d-5p(1)	0.8	NA	NA	NA	NA	0	0.8
SS18L1	mmu-miR-181c-5p(2)//mmu-miR-181d-5p(2)	mmu-miR-181c(2)//mmu-miR-181d(2)	mmu-miR-181c-5p(1)//mmu-miR-181d-5p(1)	mmu-miR-181c(2)//mmu-miR-181d(2)		miR-181c-5p(1)//miR-181d-5p(1)	0.8	NA	NA	NA	NA	0	0.8
SYNCRIP	mmu-miR-181c-5p(1)//mmu-miR-181d-5p(1)	mmu-miR-181c(2)//mmu-miR-181d(3)	mmu-miR-181c-5p(1)//mmu-miR-181d-5p(1)	mmu-miR-181c(1)//mmu-miR-181d(1)		miR-181c-5p(1)//miR-181d-5p(1)	0.8	NA	NA	NA	NA	0	0.8
TBC1D4	mmu-miR-181c-5p(1)//mmu-miR-181d-5p(1)	mmu-miR-181c(3)//mmu-miR-181d(2)	mmu-miR-181c-5p(1)//mmu-miR-181d-5p(1)	mmu-miR-181c(1)//mmu-miR-181d(1)		miR-181c-5p(1)//miR-181d-5p(1)	0.8	NA	NA	NA	NA	0	0.8
TBL1X	mmu-miR-181c-5p(1)//mmu-miR-181d-5p(1)	mmu-miR-181c(1)//mmu-miR-181d(1)	mmu-miR-181c-5p(1)//mmu-miR-181d-5p(1)	mmu-miR-181c(1)//mmu-miR-181d(1)		miR-181c-5p(1)//miR-181d-5p(1)	0.8	NA	NA	NA	NA	0	0.8
TIMP3	mmu-miR-181c-5p(2)//mmu-miR-181d-5p(2)	mmu-miR-181c(2)//mmu-miR-181d(2)	mmu-miR-181c-5p(1)//mmu-miR-181d-5p(1)	mmu-miR-181c(1)//mmu-miR-181d(1)		miR-181c-5p(1)//miR-181d-5p(1)	0.8	NA	NA	NA	NA	0	0.8
TMEM165	mmu-miR-181c-5p(1)//mmu-miR-181d-5p(1)	mmu-miR-181c(1)//mmu-miR-181d(1)	mmu-miR-181c-5p(1)//mmu-miR-181d-5p(1)	mmu-miR-181c(1)//mmu-miR-181d(1)		miR-181c-5p(1)//miR-181d-5p(1)	0.8	NA	NA	NA	NA	0	0.8
TNFAIP1	mmu-miR-181c-5p(1)//mmu-miR-181d-5p(1)	mmu-miR-181c(1)//mmu-miR-181d(1)	mmu-miR-181c-5p(1)//mmu-miR-181d-5p(1)	mmu-miR-181c(1)//mmu-miR-181d(1)		miR-181c-5p(1)//miR-181d-5p(1)	0.8	NA	NA	NA	NA	0	0.8
TNFRSF11B	mmu-miR-181c-5p(1)//mmu-miR-181d-5p(1)	mmu-miR-181c(2)//mmu-miR-181d(2)	mmu-miR-181c-5p(1)//mmu-miR-181d-5p(1)	mmu-miR-181c(1)//mmu-miR-181d(1)		miR-181c-5p(1)//miR-181d-5p(1)	0.8	NA	NA	NA	NA	0	0.8
TOM1L1	mmu-miR-181c-5p(1)//mmu-miR-181d-5p(1)	mmu-miR-181c(1)//mmu-miR-181d(1)	mmu-miR-181c-5p(1)//mmu-miR-181d-5p(1)	mmu-miR-181c(1)//mmu-miR-181d(1)		miR-181c-5p(1)//miR-181d-5p(1)	0.8	NA	NA	NA	NA	0	0.8
TRPM3	mmu-miR-181c-5p(2)//mmu-miR-181d-5p(2)	mmu-miR-181c(3)//mmu-miR-181d(3)	mmu-miR-181c-5p(1)//mmu-miR-181d-5p(1)	mmu-miR-181c(1)//mmu-miR-181d(1)		miR-181c-5p(1)//miR-181d-5p(1)	0.8	NA	NA	NA	NA	0	0.8
UBE2L3	mmu-miR-181c-5p(1)//mmu-miR-181d-5p(1)	mmu-miR-181c(1)//mmu-miR-181d(1)	mmu-miR-181c-5p(1)//mmu-miR-181d-5p(1)	mmu-miR-181c(1)//mmu-miR-181d(1)		miR-181c-5p(1)//miR-181d-5p(1)	0.8	NA	NA	NA	NA	0	0.8
UBE2N	mmu-miR-181c-5p(1)//mmu-miR-181d-5p(1)	mmu-miR-181c(2)//mmu-miR-181d(2)	mmu-miR-181c-5p(1)//mmu-miR-181d-5p(1)	mmu-miR-181c(1)//mmu-miR-181d(1)		miR-181c-5p(1)//miR-181d-5p(1)	0.8	NA	NA	NA	NA	0	0.8
UBL3	mmu-miR-181c-5p(1)//mmu-miR-181d-5p(1)	mmu-miR-181c(1)//mmu-miR-181d(1)	mmu-miR-181c-5p(1)//mmu-miR-181d-5p(1)	mmu-miR-181c(1)//mmu-miR-181d(1)		miR-181c-5p(1)//miR-181d-5p(1)	0.8	NA	NA	NA	NA	0	0.8
UNC5A	mmu-miR-181c-5p(1)//mmu-miR-181d-5p(1)	mmu-miR-181c(1)//mmu-miR-181d(1)	mmu-miR-181c-5p(1)//mmu-miR-181d-5p(1)	mmu-miR-181c(1)//mmu-miR-181d(1)		miR-181c-5p(1)//miR-181d-5p(1)	0.8	NA	NA	NA	NA	0	0.8
USP42	mmu-miR-181c-5p(1)//mmu-miR-181d-5p(1)	mmu-miR-181c(1)//mmu-miR-181d(2)	mmu-miR-181c-5p(1)//mmu-miR-181d-5p(1)	mmu-miR-181c(1)//mmu-miR-181d(1)		miR-181c-5p(1)//miR-181d-5p(1)	0.8	NA	NA	NA	NA	0	0.8
VCAN	mmu-miR-181c-5p(1)//mmu-miR-181d-5p(1)	mmu-miR-181c(2)//mmu-miR-181d(2)	mmu-miR-181c-5p(1)//mmu-miR-181d-5p(1)	mmu-miR-181c(1)//mmu-miR-181d(1)		miR-181c-5p(1)//miR-181d-5p(1)	0.8	NA	NA	NA	NA	0	0.8
XIAP	mmu-miR-181c-5p(1)//mmu-miR-181d-5p(1)	mmu-miR-181c(3)//mmu-miR-181d(3)	mmu-miR-181c-5p(1)//mmu-miR-181d-5p(1)	mmu-miR-181c(1)//mmu-miR-181d(1)		miR-181c-5p(1)//miR-181d-5p(1)	0.8	NA	NA	NA	NA	0	0.8
XPO7	mmu-miR-181c-5p(1)//mmu-miR-181d-5p(1)	mmu-miR-181c(2)//mmu-miR-181d(1)	mmu-miR-181c-5p(1)//mmu-miR-181d-5p(1)	mmu-miR-181c(1)//mmu-miR-181d(1)		miR-181c-5p(1)//miR-181d-5p(1)	0.8	NA	NA	NA	NA	0	0.8
YTHDF2	mmu-miR-181c-5p(1)//mmu-miR-181d-5p(1)	mmu-miR-181c(1)//mmu-miR-181d(1)	mmu-miR-181c-5p(1)//mmu-miR-181d-5p(1)	mmu-miR-181c(1)//mmu-miR-181d(1)		miR-181c-5p(1)//miR-181d-5p(1)	0.8	NA	NA	NA	NA	0	0.8
YWHAE	mmu-miR-181c-5p(1)//mmu-miR-181d-5p(1)	mmu-miR-181c(2)//mmu-miR-181d(2)	mmu-miR-181c-5p(1)//mmu-miR-181d-5p(1)	mmu-miR-181c(1)//mmu-miR-181d(1)		miR-181c-5p(1)//miR-181d-5p(1)	0.8	NA	NA	NA	NA	0	0.8
ZBTB43	mmu-miR-181c-5p(1)//mmu-miR-181d-5p(1)	mmu-miR-181c(1)//mmu-miR-181d(1)	mmu-miR-181c-5p(1)//mmu-miR-181d-5p(1)	mmu-miR-181c(1)//mmu-miR-181d(1)		miR-181c-5p(1)//miR-181d-5p(1)	0.8	NA	NA	NA	NA	0	0.8
ZBTB7A	mmu-miR-181c-5p(1)//mmu-miR-181d-5p(1)	mmu-miR-181c(1)//mmu-miR-181d(1)	mmu-miR-181c-5p(1)//mmu-miR-181d-5p(1)	mmu-miR-181c(1)//mmu-miR-181d(1)		miR-181c-5p(1)//miR-181d-5p(1)	0.8	NA	NA	NA	NA	0	0.8
ZEB2	mmu-miR-181c-5p(1)//mmu-miR-181d-5p(1)	mmu-miR-181c(2)//mmu-miR-181d(3)	mmu-miR-181c-5p(1)//mmu-miR-181d-5p(1)	mmu-miR-181c(1)//mmu-miR-181d(1)		miR-181c-5p(1)//miR-181d-5p(1)	0.8	NA	NA	NA	NA	0	0.8
ZFAND5	mmu-miR-181c-5p(2)//mmu-miR-181d-5p(2)	mmu-miR-181c(2)//mmu-miR-181d(2)	mmu-miR-181c-5p(1)//mmu-miR-181d-5p(1)	mmu-miR-181c(1)//mmu-miR-181d(1)		miR-181c-5p(1)//miR-181d-5p(1)	0.8	NA	NA	NA	NA	0	0.8
ZFP449	mmu-miR-181c-5p(2)//mmu-miR-181d-5p(2)	mmu-miR-181c(2)//mmu-miR-181d(2)	mmu-miR-181c-5p(1)//mmu-miR-181d-5p(1)	mmu-miR-181c(1)//mmu-miR-181d(1)		miR-181c-5p(1)//miR-181d-5p(1)	0.8	NA	NA	NA	NA	0	0.8
ZFP800	mmu-miR-181c-5p(1)//mmu-miR-181d-5p(1)	mmu-miR-181c(1)//mmu-miR-181d(1)	mmu-miR-181c-5p(1)//mmu-miR-181d-5p(1)	mmu-miR-181c(1)//mmu-miR-181d(1)		miR-181c-5p(1)//miR-181d-5p(1)	0.8	NA	NA	NA	NA	0	0.8
ZIC3	mmu-miR-181c-5p(1)//mmu-miR-181d-5p(1)	mmu-miR-181c(1)//mmu-miR-181d(1)	mmu-miR-181c-5p(1)//mmu-miR-181d-5p(1)	mmu-miR-181c(1)//mmu-miR-181d(1)		miR-181c-5p(1)//miR-181d-5p(1)	0.8	NA	NA	NA	NA	0	0.8
ZMYND11	mmu-miR-181c-5p(1)//mmu-miR-181d-5p(1)	mmu-miR-181c(1)//mmu-miR-181d(2)	mmu-miR-181c-5p(1)//mmu-miR-181d-5p(1)	mmu-miR-181c(1)//mmu-miR-181d(1)		miR-181c-5p(1)//miR-181d-5p(1)	0.8	NA	NA	NA	NA	0	0.8
DEK	mmu-miR-181c-5p(1)//mmu-miR-181d-5p(1)	mmu-miR-181d(1)	mmu-miR-181c-5p(1)//mmu-miR-181d-5p(1)		miR-181c-5p(1)//miR-181d-5p(1)	miR-181c-5p(1)//miR-181d-5p(1)	0.775	NA	NA	NA	NA	0	0.775
IGF2BP3	mmu-miR-181c-5p(1)//mmu-miR-181d-5p(1)	mmu-miR-181d(1)	mmu-miR-181c-5p(1)//mmu-miR-181d-5p(1)		miR-181c-5p(1)//miR-181d-5p(1)	miR-181c-5p(1)//miR-181d-5p(1)	0.775	NA	NA	NA	NA	0	0.775
LRIG2	mmu-miR-181c-5p(1)//mmu-miR-181d-5p(1)	mmu-miR-181d(1)	mmu-miR-181c-5p(1)//mmu-miR-181d-5p(1)		miR-181c-5p(1)//miR-181d-5p(1)	miR-181c-5p(1)//miR-181d-5p(1)	0.775	NA	NA	NA	NA	0	0.775
MGA	mmu-miR-181c-5p(1)//mmu-miR-181d-5p(1)	mmu-miR-181d(1)	mmu-miR-181c-5p(1)//mmu-miR-181d-5p(1)		miR-181c-5p(1)//miR-181d-5p(1)	miR-181c-5p(1)//miR-181d-5p(1)	0.775	NA	NA	NA	NA	0	0.775
RAB8B	mmu-miR-181c-5p(1)//mmu-miR-181d-5p(1)	mmu-miR-181c(1)//mmu-miR-181d(2)	mmu-miR-181c-5p(1)		miR-181c-5p(1)//miR-181d-5p(1)	miR-181c-5p(1)//miR-181d-5p(1)	0.775	NA	NA	NA	NA	0	0.775
SERTAD2	mmu-miR-181c-5p(2)//mmu-miR-181d-5p(2)	mmu-miR-181d(1)	mmu-miR-181c-5p(1)//mmu-miR-181d-5p(1)		miR-181c-5p(1)//miR-181d-5p(1)	miR-181c-5p(1)//miR-181d-5p(1)	0.775	NA	NA	NA	NA	0	0.775
WIPF2	mmu-miR-181c-5p(1)//mmu-miR-181d-5p(1)	mmu-miR-181c(1)	mmu-miR-181c-5p(1)//mmu-miR-181d-5p(1)		miR-181c-5p(1)//miR-181d-5p(1)	miR-181c-5p(1)//miR-181d-5p(1)	0.775	NA	NA	NA	NA	0	0.775
YOD1	mmu-miR-181c-5p(1)//mmu-miR-181d-5p(1)	mmu-miR-181d(1)	mmu-miR-181c-5p(1)//mmu-miR-181d-5p(1)		miR-181c-5p(1)//miR-181d-5p(1)	miR-181c-5p(1)//miR-181d-5p(1)	0.775	NA	NA	NA	NA	0	0.775
ABTB2	mmu-miR-181c-5p(1)//mmu-miR-181d-5p(1)	mmu-miR-181c(2)//mmu-miR-181d(2)	mmu-miR-181c-5p(1)//mmu-miR-181d-5p(1)		miR-181d-5p(1)	miR-181c-5p(1)//miR-181d-5p(1)	0.75	NA	NA	NA	NA	0	0.75
ACVR1C	mmu-miR-181c-5p(1)//mmu-miR-181d-5p(1)	mmu-miR-181c(1)//mmu-miR-181d(1)	mmu-miR-181c-5p(1)//mmu-miR-181d-5p(1)		miR-181c-5p(1)	miR-181c-5p(1)//miR-181d-5p(1)	0.75	NA	NA	NA	NA	0	0.75
AKIRIN1	mmu-miR-181c-5p(1)//mmu-miR-181d-5p(1)	mmu-miR-181c(2)//mmu-miR-181d(1)	mmu-miR-181c-5p(1)//mmu-miR-181d-5p(1)		miR-181c-5p(1)	miR-181c-5p(1)//miR-181d-5p(1)	0.75	NA	NA	NA	NA	0	0.75
ALDH3A2	mmu-miR-181c-5p(1)//mmu-miR-181d-5p(1)	mmu-miR-181c(2)//mmu-miR-181d(2)	mmu-miR-181c-5p(1)//mmu-miR-181d-5p(1)		miR-181c-5p(1)	miR-181c-5p(1)//miR-181d-5p(1)	0.75	NA	NA	NA	NA	0	0.75
AMOT		mmu-miR-181c(1)//mmu-miR-181d(1)	mmu-miR-181c-5p(1)//mmu-miR-181d-5p(1)	mmu-miR-181c(1)//mmu-miR-181d(1)	miR-181c-5p(1)	miR-181c-5p(1)//miR-181d-5p(1)	0.75	NA	NA	NA	NA	0	0.75
ATP6V1A	mmu-miR-181c-5p(1)//mmu-miR-181d-5p(1)	mmu-miR-181c(1)//mmu-miR-181d(1)	mmu-miR-181c-5p(1)//mmu-miR-181d-5p(1)		miR-181d-5p(1)	miR-181c-5p(1)//miR-181d-5p(1)	0.75	NA	NA	NA	NA	0	0.75
BTLA	mmu-miR-181c-5p(1)//mmu-miR-181d-5p(1)	mmu-miR-181c(1)//mmu-miR-181d(1)	mmu-miR-181c-5p(1)//mmu-miR-181d-5p(1)		miR-181d-5p(1)	miR-181c-5p(1)//miR-181d-5p(1)	0.75	NA	NA	NA	NA	0	0.75
CACNA2D1	mmu-miR-181c-5p(1)//mmu-miR-181d-5p(1)		mmu-miR-181c-5p(1)//mmu-miR-181d-5p(1)	mmu-miR-181c(1)//mmu-miR-181d(1)	miR-181d-5p(1)	miR-181c-5p(1)//miR-181d-5p(1)	0.75	NA	NA	NA	NA	0	0.75
CBX5	mmu-miR-181c-5p(1)//mmu-miR-181d-5p(1)		mmu-miR-181c-5p(1)//mmu-miR-181d-5p(1)	mmu-miR-181c(1)//mmu-miR-181d(1)	miR-181c-5p(1)	miR-181c-5p(1)//miR-181d-5p(1)	0.75	NA	NA	NA	NA	0	0.75
CCNB1	mmu-miR-181c-5p(1)//mmu-miR-181d-5p(1)	mmu-miR-181c(1)//mmu-miR-181d(1)	mmu-miR-181c-5p(1)//mmu-miR-181d-5p(1)		miR-181c-5p(1)	miR-181c-5p(1)//miR-181d-5p(1)	0.75	NA	NA	NA	NA	0	0.75
CD2AP	mmu-miR-181c-5p(1)//mmu-miR-181d-5p(1)	mmu-miR-181c(3)//mmu-miR-181d(3)	mmu-miR-181c-5p(1)//mmu-miR-181d-5p(1)		miR-181d-5p(1)	miR-181c-5p(1)//miR-181d-5p(1)	0.75	NA	NA	NA	NA	0	0.75
CDC7	mmu-miR-181c-5p(1)//mmu-miR-181d-5p(1)	mmu-miR-181c(1)//mmu-miR-181d(1)	mmu-miR-181c-5p(1)//mmu-miR-181d-5p(1)		miR-181c-5p(1)	miR-181c-5p(1)//miR-181d-5p(1)	0.75	NA	NA	NA	NA	0	0.75
CDON	mmu-miR-181c-5p(1)//mmu-miR-181d-5p(1)		mmu-miR-181c-5p(1)//mmu-miR-181d-5p(1)	mmu-miR-181c(1)//mmu-miR-181d(1)	miR-181c-5p(1)	miR-181c-5p(1)//miR-181d-5p(1)	0.75	NA	NA	NA	NA	0	0.75
CGGBP1		mmu-miR-181c(5)//mmu-miR-181d(5)	mmu-miR-181c-5p(1)//mmu-miR-181d-5p(1)	mmu-miR-181c(1)//mmu-miR-181d(1)	miR-181d-5p(1)	miR-181c-5p(1)//miR-181d-5p(1)	0.75	NA	NA	NA	NA	0	0.75
CUL5	mmu-miR-181c-5p(1)//mmu-miR-181d-5p(1)	mmu-miR-181c(1)//mmu-miR-181d(2)	mmu-miR-181c-5p(1)//mmu-miR-181d-5p(1)		miR-181c-5p(1)	miR-181c-5p(1)//miR-181d-5p(1)	0.75	NA	NA	NA	NA	0	0.75
DNAJC13	mmu-miR-181c-5p(1)//mmu-miR-181d-5p(1)	mmu-miR-181c(2)//mmu-miR-181d(2)	mmu-miR-181c-5p(1)//mmu-miR-181d-5p(1)		miR-181d-5p(1)	miR-181c-5p(1)//miR-181d-5p(1)	0.75	NA	NA	NA	NA	0	0.75
DOCK10	mmu-miR-181c-5p(1)//mmu-miR-181d-5p(1)	mmu-miR-181c(1)//mmu-miR-181d(2)	mmu-miR-181c-5p(1)//mmu-miR-181d-5p(1)		miR-181c-5p(1)	miR-181c-5p(1)//miR-181d-5p(1)	0.75	NA	NA	NA	NA	0	0.75
ENTPD6	mmu-miR-181c-5p(2)//mmu-miR-181d-5p(2)	mmu-miR-181c(3)//mmu-miR-181d(3)	mmu-miR-181c-5p(1)//mmu-miR-181d-5p(1)		miR-181c-5p(1)	miR-181c-5p(1)//miR-181d-5p(1)	0.75	NA	NA	NA	NA	0	0.75
EYA1		mmu-miR-181c(1)//mmu-miR-181d(1)	mmu-miR-181c-5p(1)//mmu-miR-181d-5p(1)	mmu-miR-181c(1)//mmu-miR-181d(1)	miR-181d-5p(1)	miR-181c-5p(1)//miR-181d-5p(1)	0.75	NA	NA	NA	NA	0	0.75
FAM122B	mmu-miR-181c-5p(1)//mmu-miR-181d-5p(1)	mmu-miR-181c(3)//mmu-miR-181d(3)	mmu-miR-181c-5p(1)//mmu-miR-181d-5p(1)		miR-181c-5p(1)	miR-181c-5p(1)//miR-181d-5p(1)	0.75	NA	NA	NA	NA	0	0.75
FAM3C	mmu-miR-181c-5p(1)//mmu-miR-181d-5p(1)	mmu-miR-181c(2)//mmu-miR-181d(3)	mmu-miR-181c-5p(1)//mmu-miR-181d-5p(1)		miR-181c-5p(1)	miR-181c-5p(1)//miR-181d-5p(1)	0.75	NA	NA	NA	NA	0	0.75
IPO5	mmu-miR-181c-5p(1)//mmu-miR-181d-5p(1)	mmu-miR-181c(1)//mmu-miR-181d(1)	mmu-miR-181c-5p(1)//mmu-miR-181d-5p(1)		miR-181c-5p(1)	miR-181c-5p(1)//miR-181d-5p(1)	0.75	NA	NA	NA	NA	0	0.75
KIF3B	mmu-miR-181c-5p(1)//mmu-miR-181d-5p(1)	mmu-miR-181c(1)//mmu-miR-181d(1)	mmu-miR-181c-5p(1)//mmu-miR-181d-5p(1)		miR-181d-5p(1)	miR-181c-5p(1)//miR-181d-5p(1)	0.75	NA	NA	NA	NA	0	0.75
LYRM1	mmu-miR-181c-5p(1)//mmu-miR-181d-5p(1)	mmu-miR-181c(2)//mmu-miR-181d(2)	mmu-miR-181c-5p(1)//mmu-miR-181d-5p(1)		miR-181c-5p(1)	miR-181c-5p(1)//miR-181d-5p(1)	0.75	NA	NA	NA	NA	0	0.75
MAP2K1		mmu-miR-181c(1)//mmu-miR-181d(1)	mmu-miR-181c-5p(1)//mmu-miR-181d-5p(1)	mmu-miR-181c(1)//mmu-miR-181d(1)	miR-181c-5p(1)	miR-181c-5p(1)//miR-181d-5p(1)	0.75	NA	NA	NA	NA	0	0.75
MBOAT1	mmu-miR-181c-5p(1)//mmu-miR-181d-5p(1)	mmu-miR-181c(1)//mmu-miR-181d(1)	mmu-miR-181c-5p(1)//mmu-miR-181d-5p(1)		miR-181d-5p(1)	miR-181c-5p(1)//miR-181d-5p(1)	0.75	NA	NA	NA	NA	0	0.75
MKNK2	mmu-miR-181c-5p(1)//mmu-miR-181d-5p(1)		mmu-miR-181c-5p(1)//mmu-miR-181d-5p(1)	mmu-miR-181c(1)//mmu-miR-181d(1)	miR-181c-5p(1)	miR-181c-5p(1)//miR-181d-5p(1)	0.75	NA	NA	NA	NA	0	0.75
NFIB	mmu-miR-181c-5p(1)//mmu-miR-181d-5p(1)		mmu-miR-181c-5p(1)//mmu-miR-181d-5p(1)	mmu-miR-181c(1)//mmu-miR-181d(1)	miR-181c-5p(1)	miR-181c-5p(1)//miR-181d-5p(1)	0.75	NA	NA	NA	NA	0	0.75
NKRF	mmu-miR-181c-5p(1)//mmu-miR-181d-5p(1)	mmu-miR-181c(2)//mmu-miR-181d(1)	mmu-miR-181c-5p(1)//mmu-miR-181d-5p(1)		miR-181c-5p(1)	miR-181c-5p(1)//miR-181d-5p(1)	0.75	NA	NA	NA	NA	0	0.75
OGFRL1	mmu-miR-181c-5p(1)//mmu-miR-181d-5p(1)	mmu-miR-181c(1)//mmu-miR-181d(1)	mmu-miR-181c-5p(1)//mmu-miR-181d-5p(1)		miR-181d-5p(1)	miR-181c-5p(1)//miR-181d-5p(1)	0.75	NA	NA	NA	NA	0	0.75
OXR1		mmu-miR-181c(1)//mmu-miR-181d(1)	mmu-miR-181c-5p(1)//mmu-miR-181d-5p(1)	mmu-miR-181c(1)//mmu-miR-181d(1)	miR-181d-5p(1)	miR-181c-5p(1)//miR-181d-5p(1)	0.75	NA	NA	NA	NA	0	0.75
PAPD5	mmu-miR-181c-5p(1)//mmu-miR-181d-5p(1)	mmu-miR-181c(1)//mmu-miR-181d(1)	mmu-miR-181c-5p(1)//mmu-miR-181d-5p(1)		miR-181c-5p(1)	miR-181c-5p(1)//miR-181d-5p(1)	0.75	NA	NA	NA	NA	0	0.75
PHF2	mmu-miR-181c-5p(1)//mmu-miR-181d-5p(1)	mmu-miR-181c(1)//mmu-miR-181d(1)	mmu-miR-181c-5p(1)//mmu-miR-181d-5p(1)		miR-181d-5p(1)	miR-181c-5p(1)//miR-181d-5p(1)	0.75	NA	NA	NA	NA	0	0.75
PLEKHJ1	mmu-miR-181c-5p(1)//mmu-miR-181d-5p(1)	mmu-miR-181c(1)//mmu-miR-181d(1)	mmu-miR-181c-5p(1)//mmu-miR-181d-5p(1)		miR-181c-5p(1)	miR-181c-5p(1)//miR-181d-5p(1)	0.75	NA	NA	NA	NA	0	0.75
PSAP	mmu-miR-181c-5p(1)//mmu-miR-181d-5p(1)	mmu-miR-181c(1)//mmu-miR-181d(1)	mmu-miR-181c-5p(1)//mmu-miR-181d-5p(1)		miR-181c-5p(1)	miR-181c-5p(1)//miR-181d-5p(1)	0.75	NA	NA	NA	NA	0	0.75
PSIP1		mmu-miR-181c(1)//mmu-miR-181d(1)	mmu-miR-181c-5p(1)//mmu-miR-181d-5p(1)	mmu-miR-181c(1)//mmu-miR-181d(1)	miR-181d-5p(1)	miR-181c-5p(1)//miR-181d-5p(1)	0.75	NA	NA	NA	NA	0	0.75
RALGAPB	mmu-miR-181c-5p(1)//mmu-miR-181d-5p(1)	mmu-miR-181c(2)//mmu-miR-181d(3)	mmu-miR-181c-5p(1)//mmu-miR-181d-5p(1)		miR-181c-5p(1)	miR-181c-5p(1)//miR-181d-5p(1)	0.75	NA	NA	NA	NA	0	0.75
RNF103	mmu-miR-181c-5p(1)//mmu-miR-181d-5p(1)	mmu-miR-181c(1)//mmu-miR-181d(1)	mmu-miR-181c-5p(1)//mmu-miR-181d-5p(1)		miR-181c-5p(1)	miR-181c-5p(1)//miR-181d-5p(1)	0.75	NA	NA	NA	NA	0	0.75
RNF19A		mmu-miR-181c(1)//mmu-miR-181d(1)	mmu-miR-181c-5p(1)//mmu-miR-181d-5p(1)	mmu-miR-181c(1)//mmu-miR-181d(1)	miR-181d-5p(1)	miR-181c-5p(1)//miR-181d-5p(1)	0.75	NA	NA	NA	NA	0	0.75
RNF6		mmu-miR-181c(2)//mmu-miR-181d(2)	mmu-miR-181c-5p(1)//mmu-miR-181d-5p(1)	mmu-miR-181c(1)//mmu-miR-181d(1)	miR-181c-5p(1)	miR-181c-5p(1)//miR-181d-5p(1)	0.75	NA	NA	NA	NA	0	0.75
SCOC		mmu-miR-181c(1)//mmu-miR-181d(1)	mmu-miR-181c-5p(1)//mmu-miR-181d-5p(1)	mmu-miR-181c(1)//mmu-miR-181d(1)	miR-181d-5p(1)	miR-181c-5p(1)//miR-181d-5p(1)	0.75	NA	NA	NA	NA	0	0.75
SENP2		mmu-miR-181c(1)//mmu-miR-181d(1)	mmu-miR-181c-5p(1)//mmu-miR-181d-5p(1)	mmu-miR-181c(1)//mmu-miR-181d(1)	miR-181d-5p(1)	miR-181c-5p(1)//miR-181d-5p(1)	0.75	NA	NA	NA	NA	0	0.75
SERPINE1	mmu-miR-181c-5p(1)//mmu-miR-181d-5p(1)	mmu-miR-181c(1)//mmu-miR-181d(1)	mmu-miR-181c-5p(1)//mmu-miR-181d-5p(1)		miR-181d-5p(1)	miR-181c-5p(1)//miR-181d-5p(1)	0.75	NA	NA	NA	NA	0	0.75
SIN3B		mmu-miR-181c(1)//mmu-miR-181d(1)	mmu-miR-181c-5p(1)//mmu-miR-181d-5p(1)	mmu-miR-181c(1)//mmu-miR-181d(1)	miR-181c-5p(1)	miR-181c-5p(1)//miR-181d-5p(1)	0.75	NA	NA	NA	NA	0	0.75
SLAIN1	mmu-miR-181c-5p(1)//mmu-miR-181d-5p(1)	mmu-miR-181c(1)//mmu-miR-181d(1)	mmu-miR-181c-5p(1)//mmu-miR-181d-5p(1)		miR-181d-5p(1)	miR-181c-5p(1)//miR-181d-5p(1)	0.75	NA	NA	NA	NA	0	0.75
SPIN1		mmu-miR-181c(1)//mmu-miR-181d(1)	mmu-miR-181c-5p(1)//mmu-miR-181d-5p(1)	mmu-miR-181c(1)//mmu-miR-181d(1)	miR-181d-5p(1)	miR-181c-5p(1)//miR-181d-5p(1)	0.75	NA	NA	NA	NA	0	0.75
TGFBI		mmu-miR-181c(2)//mmu-miR-181d(1)	mmu-miR-181c-5p(1)//mmu-miR-181d-5p(1)	mmu-miR-181c(1)//mmu-miR-181d(1)	miR-181c-5p(1)	miR-181c-5p(1)//miR-181d-5p(1)	0.75	NA	NA	NA	NA	0	0.75
TMEM87B	mmu-miR-181c-5p(1)//mmu-miR-181d-5p(1)	mmu-miR-181c(2)//mmu-miR-181d(2)	mmu-miR-181c-5p(1)//mmu-miR-181d-5p(1)		miR-181c-5p(1)	miR-181c-5p(1)//miR-181d-5p(1)	0.75	NA	NA	NA	NA	0	0.75
TNIK	mmu-miR-181c-5p(2)//mmu-miR-181d-5p(2)	mmu-miR-181c(1)//mmu-miR-181d(1)	mmu-miR-181c-5p(1)//mmu-miR-181d-5p(1)		miR-181d-5p(1)	miR-181c-5p(1)//miR-181d-5p(1)	0.75	NA	NA	NA	NA	0	0.75
TRP53INP2		mmu-miR-181c(1)//mmu-miR-181d(1)	mmu-miR-181c-5p(1)//mmu-miR-181d-5p(1)	mmu-miR-181c(1)//mmu-miR-181d(1)	miR-181c-5p(1)	miR-181c-5p(1)//miR-181d-5p(1)	0.75	NA	NA	NA	NA	0	0.75
TTC39B	mmu-miR-181c-5p(1)//mmu-miR-181d-5p(1)	mmu-miR-181c(1)//mmu-miR-181d(1)	mmu-miR-181c-5p(1)//mmu-miR-181d-5p(1)		miR-181d-5p(1)	miR-181c-5p(1)//miR-181d-5p(1)	0.75	NA	NA	NA	NA	0	0.75
UGCG	mmu-miR-181c-5p(1)//mmu-miR-181d-5p(1)	mmu-miR-181c(2)//mmu-miR-181d(2)	mmu-miR-181c-5p(1)//mmu-miR-181d-5p(1)		miR-181c-5p(1)	miR-181c-5p(1)//miR-181d-5p(1)	0.75	NA	NA	NA	NA	0	0.75
UNKL	mmu-miR-181c-5p(1)//mmu-miR-181d-5p(1)	mmu-miR-181c(1)//mmu-miR-181d(3)	mmu-miR-181c-5p(1)//mmu-miR-181d-5p(1)		miR-181c-5p(1)	miR-181c-5p(1)//miR-181d-5p(1)	0.75	NA	NA	NA	NA	0	0.75
USP12	mmu-miR-181c-5p(1)//mmu-miR-181d-5p(1)	mmu-miR-181c(1)//mmu-miR-181d(1)		mmu-miR-181c(1)//mmu-miR-181d(1)	miR-181c-5p(1)	miR-181c-5p(1)//miR-181d-5p(1)	0.75	NA	NA	NA	NA	0	0.75
YTHDC1	mmu-miR-181c-5p(1)//mmu-miR-181d-5p(1)	mmu-miR-181c(1)//mmu-miR-181d(1)	mmu-miR-181c-5p(1)//mmu-miR-181d-5p(1)		miR-181c-5p(1)	miR-181c-5p(1)//miR-181d-5p(1)	0.75	NA	NA	NA	NA	0	0.75
ADAM22	mmu-miR-181c-5p(1)//mmu-miR-181d-5p(1)	mmu-miR-181d(1)	mmu-miR-181c-5p(1)//mmu-miR-181d-5p(1)	mmu-miR-181c(1)//mmu-miR-181d(1)		miR-181c-5p(1)//miR-181d-5p(1)	0.725	NA	NA	NA	NA	0	0.725
CKS1B	mmu-miR-181c-5p(1)//mmu-miR-181d-5p(1)	mmu-miR-181c(1)//mmu-miR-181d(1)	mmu-miR-181c-5p(1)	mmu-miR-181c(1)//mmu-miR-181d(1)		miR-181c-5p(1)//miR-181d-5p(1)	0.725	NA	NA	NA	NA	0	0.725
EN2	mmu-miR-181c-5p(1)//mmu-miR-181d-5p(1)	mmu-miR-181c(1)//mmu-miR-181d(1)	mmu-miR-181c-5p(1)	mmu-miR-181c(1)//mmu-miR-181d(1)		miR-181c-5p(1)//miR-181d-5p(1)	0.725	NA	NA	NA	NA	0	0.725
RABGEF1	mmu-miR-181c-5p(1)//mmu-miR-181d-5p(1)	mmu-miR-181c(1)//mmu-miR-181d(1)	mmu-miR-181c-5p(1)//mmu-miR-181d-5p(1)	mmu-miR-181d(1)		miR-181c-5p(1)//miR-181d-5p(1)	0.725	NA	NA	NA	NA	0	0.725
TAF9B	mmu-miR-181c-5p(1)//mmu-miR-181d-5p(1)	mmu-miR-181c(1)//mmu-miR-181d(1)	mmu-miR-181c-5p(1)//mmu-miR-181d-5p(1)	mmu-miR-181c(1)		miR-181c-5p(1)//miR-181d-5p(1)	0.725	NA	NA	NA	NA	0	0.725
ADAM12		mmu-miR-181c(1)//mmu-miR-181d(1)	mmu-miR-181c-5p(1)//mmu-miR-181d-5p(1)		miR-181c-5p(1)//miR-181d-5p(1)	miR-181c-5p(1)//miR-181d-5p(1)	0.7	NA	NA	NA	NA	0	0.7
ARF3	mmu-miR-181c-5p(1)//mmu-miR-181d-5p(1)		mmu-miR-181c-5p(1)//mmu-miR-181d-5p(1)		miR-181c-5p(1)//miR-181d-5p(1)	miR-181c-5p(1)//miR-181d-5p(1)	0.7	NA	NA	NA	NA	0	0.7
ARMC8		mmu-miR-181c(1)//mmu-miR-181d(2)	mmu-miR-181c-5p(1)//mmu-miR-181d-5p(1)		miR-181c-5p(1)//miR-181d-5p(1)	miR-181c-5p(1)//miR-181d-5p(1)	0.7	NA	NA	NA	NA	0	0.7
ATAD1		mmu-miR-181c(2)//mmu-miR-181d(1)	mmu-miR-181c-5p(1)//mmu-miR-181d-5p(1)		miR-181c-5p(1)//miR-181d-5p(1)	miR-181c-5p(1)//miR-181d-5p(1)	0.7	NA	NA	NA	NA	0	0.7
AVL9		mmu-miR-181c(1)//mmu-miR-181d(1)	mmu-miR-181c-5p(1)//mmu-miR-181d-5p(1)		miR-181c-5p(1)//miR-181d-5p(1)	miR-181c-5p(1)//miR-181d-5p(1)	0.7	NA	NA	NA	NA	0	0.7
B630005N14RIK	mmu-miR-181c-5p(1)//mmu-miR-181d-5p(1)	mmu-miR-181c(2)//mmu-miR-181d(3)	mmu-miR-181c-5p(1)//mmu-miR-181d-5p(1)	mmu-miR-181c(1)//mmu-miR-181d(1)	miR-181c-5p(1)		0.7	NA	NA	NA	NA	0	0.7
BCL6	mmu-miR-181c-5p(1)//mmu-miR-181d-5p(1)		mmu-miR-181c-5p(1)//mmu-miR-181d-5p(1)		miR-181c-5p(1)//miR-181d-5p(1)	miR-181c-5p(1)//miR-181d-5p(1)	0.7	NA	NA	NA	NA	0	0.7
BEND4	mmu-miR-181c-5p(1)//mmu-miR-181d-5p(1)		mmu-miR-181c-5p(1)//mmu-miR-181d-5p(1)		miR-181c-5p(1)//miR-181d-5p(1)	miR-181c-5p(1)//miR-181d-5p(1)	0.7	NA	NA	NA	NA	0	0.7
BRCA1		mmu-miR-181c(1)//mmu-miR-181d(2)	mmu-miR-181c-5p(1)//mmu-miR-181d-5p(1)		miR-181c-5p(1)//miR-181d-5p(1)	miR-181c-5p(1)//miR-181d-5p(1)	0.7	NA	NA	NA	NA	0	0.7
CALCRL		mmu-miR-181c(3)//mmu-miR-181d(3)	mmu-miR-181c-5p(1)//mmu-miR-181d-5p(1)		miR-181c-5p(1)//miR-181d-5p(1)	miR-181c-5p(1)//miR-181d-5p(1)	0.7	NA	NA	NA	NA	0	0.7
CASP2		mmu-miR-181c(1)//mmu-miR-181d(1)	mmu-miR-181c-5p(1)//mmu-miR-181d-5p(1)		miR-181c-5p(1)//miR-181d-5p(1)	miR-181c-5p(1)//miR-181d-5p(1)	0.7	NA	NA	NA	NA	0	0.7
CD96		mmu-miR-181c(1)//mmu-miR-181d(2)	mmu-miR-181c-5p(1)//mmu-miR-181d-5p(1)		miR-181c-5p(1)//miR-181d-5p(1)	miR-181c-5p(1)//miR-181d-5p(1)	0.7	NA	NA	NA	NA	0	0.7
CDADC1		mmu-miR-181c(1)//mmu-miR-181d(1)	mmu-miR-181c-5p(1)//mmu-miR-181d-5p(1)		miR-181c-5p(1)//miR-181d-5p(1)	miR-181c-5p(1)//miR-181d-5p(1)	0.7	NA	NA	NA	NA	0	0.7
CFLAR		mmu-miR-181c(2)//mmu-miR-181d(2)	mmu-miR-181c-5p(1)//mmu-miR-181d-5p(1)		miR-181c-5p(1)//miR-181d-5p(1)	miR-181c-5p(1)//miR-181d-5p(1)	0.7	NA	NA	NA	NA	0	0.7
CHORDC1		mmu-miR-181c(1)//mmu-miR-181d(1)	mmu-miR-181c-5p(1)//mmu-miR-181d-5p(1)		miR-181c-5p(1)//miR-181d-5p(1)	miR-181c-5p(1)//miR-181d-5p(1)	0.7	NA	NA	NA	NA	0	0.7
COL5A1	mmu-miR-181c-5p(1)//mmu-miR-181d-5p(1)		mmu-miR-181c-5p(1)//mmu-miR-181d-5p(1)		miR-181c-5p(1)//miR-181d-5p(1)	miR-181c-5p(1)//miR-181d-5p(1)	0.7	NA	NA	NA	NA	0	0.7
CPEB2		mmu-miR-181c(1)//mmu-miR-181d(1)	mmu-miR-181c-5p(1)//mmu-miR-181d-5p(1)		miR-181c-5p(1)//miR-181d-5p(1)	miR-181c-5p(1)//miR-181d-5p(1)	0.7	NA	NA	NA	NA	0	0.7
CPEB4	mmu-miR-181c-5p(3)//mmu-miR-181d-5p(3)		mmu-miR-181c-5p(1)//mmu-miR-181d-5p(1)		miR-181c-5p(1)//miR-181d-5p(1)	miR-181c-5p(1)//miR-181d-5p(1)	0.7	NA	NA	NA	NA	0	0.7
CREM		mmu-miR-181c(2)//mmu-miR-181d(4)	mmu-miR-181c-5p(1)//mmu-miR-181d-5p(1)		miR-181c-5p(1)//miR-181d-5p(1)	miR-181c-5p(1)//miR-181d-5p(1)	0.7	NA	NA	NA	NA	0	0.7
CRIM1	mmu-miR-181c-5p(1)//mmu-miR-181d-5p(1)		mmu-miR-181c-5p(1)//mmu-miR-181d-5p(1)		miR-181c-5p(1)//miR-181d-5p(1)	miR-181c-5p(1)//miR-181d-5p(1)	0.7	NA	NA	NA	NA	0	0.7
CUL4B		mmu-miR-181c(1)//mmu-miR-181d(1)	mmu-miR-181c-5p(1)//mmu-miR-181d-5p(1)		miR-181c-5p(1)//miR-181d-5p(1)	miR-181c-5p(1)//miR-181d-5p(1)	0.7	NA	NA	NA	NA	0	0.7
DCP2	mmu-miR-181c-5p(1)//mmu-miR-181d-5p(1)		mmu-miR-181c-5p(1)//mmu-miR-181d-5p(1)		miR-181c-5p(1)//miR-181d-5p(1)	miR-181c-5p(1)//miR-181d-5p(1)	0.7	NA	NA	NA	NA	0	0.7
DENND1B		mmu-miR-181c(1)//mmu-miR-181d(1)	mmu-miR-181c-5p(1)//mmu-miR-181d-5p(1)		miR-181c-5p(1)//miR-181d-5p(1)	miR-181c-5p(1)//miR-181d-5p(1)	0.7	NA	NA	NA	NA	0	0.7
DENND5B	mmu-miR-181c-5p(1)//mmu-miR-181d-5p(1)		mmu-miR-181c-5p(1)//mmu-miR-181d-5p(1)		miR-181c-5p(1)//miR-181d-5p(1)	miR-181c-5p(1)//miR-181d-5p(1)	0.7	NA	NA	NA	NA	0	0.7
DGKQ		mmu-miR-181c(1)//mmu-miR-181d(1)	mmu-miR-181c-5p(1)//mmu-miR-181d-5p(1)		miR-181c-5p(1)//miR-181d-5p(1)	miR-181c-5p(1)//miR-181d-5p(1)	0.7	NA	NA	NA	NA	0	0.7
DLG2	mmu-miR-181c-5p(1)//mmu-miR-181d-5p(1)	mmu-miR-181c(2)//mmu-miR-181d(2)	mmu-miR-181c-5p(1)//mmu-miR-181d-5p(1)	mmu-miR-181c(1)//mmu-miR-181d(1)		miR-181c-5p(1)	0.7	NA	NA	NA	NA	0	0.7
DNMT3A		mmu-miR-181c(1)//mmu-miR-181d(1)	mmu-miR-181c-5p(1)//mmu-miR-181d-5p(1)		miR-181c-5p(1)//miR-181d-5p(1)	miR-181c-5p(1)//miR-181d-5p(1)	0.7	NA	NA	NA	NA	0	0.7
EIF5B		mmu-miR-181c(1)//mmu-miR-181d(1)	mmu-miR-181c-5p(1)//mmu-miR-181d-5p(1)		miR-181c-5p(1)//miR-181d-5p(1)	miR-181c-5p(1)//miR-181d-5p(1)	0.7	NA	NA	NA	NA	0	0.7
FAM169A		mmu-miR-181c(1)//mmu-miR-181d(1)	mmu-miR-181c-5p(1)//mmu-miR-181d-5p(1)		miR-181c-5p(1)//miR-181d-5p(1)	miR-181c-5p(1)//miR-181d-5p(1)	0.7	NA	NA	NA	NA	0	0.7
FASL		mmu-miR-181c(2)//mmu-miR-181d(2)	mmu-miR-181c-5p(1)//mmu-miR-181d-5p(1)		miR-181c-5p(1)//miR-181d-5p(1)	miR-181c-5p(1)//miR-181d-5p(1)	0.7	NA	NA	NA	NA	0	0.7
FBXW11		mmu-miR-181c(4)//mmu-miR-181d(3)	mmu-miR-181c-5p(1)//mmu-miR-181d-5p(1)		miR-181c-5p(1)//miR-181d-5p(1)	miR-181c-5p(1)//miR-181d-5p(1)	0.7	NA	NA	NA	NA	0	0.7
FEM1B		mmu-miR-181c(2)//mmu-miR-181d(1)	mmu-miR-181c-5p(1)//mmu-miR-181d-5p(1)		miR-181c-5p(1)//miR-181d-5p(1)	miR-181c-5p(1)//miR-181d-5p(1)	0.7	NA	NA	NA	NA	0	0.7
FOXP1	mmu-miR-181c-5p(3)//mmu-miR-181d-5p(3)		mmu-miR-181c-5p(1)//mmu-miR-181d-5p(1)		miR-181c-5p(1)//miR-181d-5p(1)	miR-181c-5p(1)//miR-181d-5p(1)	0.7	NA	NA	NA	NA	0	0.7
G2E3		mmu-miR-181c(1)//mmu-miR-181d(1)	mmu-miR-181c-5p(1)//mmu-miR-181d-5p(1)		miR-181c-5p(1)//miR-181d-5p(1)	miR-181c-5p(1)//miR-181d-5p(1)	0.7	NA	NA	NA	NA	0	0.7
GFI1		mmu-miR-181c(1)//mmu-miR-181d(1)	mmu-miR-181c-5p(1)//mmu-miR-181d-5p(1)		miR-181c-5p(1)//miR-181d-5p(1)	miR-181c-5p(1)//miR-181d-5p(1)	0.7	NA	NA	NA	NA	0	0.7
GPCPD1		mmu-miR-181c(2)//mmu-miR-181d(2)	mmu-miR-181c-5p(1)//mmu-miR-181d-5p(1)		miR-181c-5p(1)//miR-181d-5p(1)	miR-181c-5p(1)//miR-181d-5p(1)	0.7	NA	NA	NA	NA	0	0.7
H2-K1		mmu-miR-181c(3)//mmu-miR-181d(3)	mmu-miR-181c-5p(1)//mmu-miR-181d-5p(1)		miR-181c-5p(1)//miR-181d-5p(1)	miR-181c-5p(1)//miR-181d-5p(1)	0.7	NA	NA	NA	NA	0	0.7
HIPK1	mmu-miR-181c-5p(1)//mmu-miR-181d-5p(1)		mmu-miR-181c-5p(1)//mmu-miR-181d-5p(1)		miR-181c-5p(1)//miR-181d-5p(1)	miR-181c-5p(1)//miR-181d-5p(1)	0.7	NA	NA	NA	NA	0	0.7
HIPK3	mmu-miR-181c-5p(1)//mmu-miR-181d-5p(1)		mmu-miR-181c-5p(1)//mmu-miR-181d-5p(1)		miR-181c-5p(1)//miR-181d-5p(1)	miR-181c-5p(1)//miR-181d-5p(1)	0.7	NA	NA	NA	NA	0	0.7
HNRNPA2B1		mmu-miR-181c(1)//mmu-miR-181d(1)	mmu-miR-181c-5p(1)//mmu-miR-181d-5p(1)		miR-181c-5p(1)//miR-181d-5p(1)	miR-181c-5p(1)//miR-181d-5p(1)	0.7	NA	NA	NA	NA	0	0.7
HNRNPU	mmu-miR-181c-5p(1)//mmu-miR-181d-5p(1)		mmu-miR-181c-5p(1)//mmu-miR-181d-5p(1)		miR-181c-5p(1)//miR-181d-5p(1)	miR-181c-5p(1)//miR-181d-5p(1)	0.7	NA	NA	NA	NA	0	0.7
HSPA4L		mmu-miR-181c(1)//mmu-miR-181d(1)	mmu-miR-181c-5p(1)//mmu-miR-181d-5p(1)		miR-181c-5p(1)//miR-181d-5p(1)	miR-181c-5p(1)//miR-181d-5p(1)	0.7	NA	NA	NA	NA	0	0.7
INO80D	mmu-miR-181c-5p(3)//mmu-miR-181d-5p(3)		mmu-miR-181c-5p(1)//mmu-miR-181d-5p(1)		miR-181c-5p(1)//miR-181d-5p(1)	miR-181c-5p(1)//miR-181d-5p(1)	0.7	NA	NA	NA	NA	0	0.7
ITGB1		mmu-miR-181c(1)//mmu-miR-181d(1)	mmu-miR-181c-5p(1)//mmu-miR-181d-5p(1)		miR-181c-5p(1)//miR-181d-5p(1)	miR-181c-5p(1)//miR-181d-5p(1)	0.7	NA	NA	NA	NA	0	0.7
KLF7	mmu-miR-181c-5p(2)//mmu-miR-181d-5p(2)		mmu-miR-181c-5p(1)//mmu-miR-181d-5p(1)		miR-181c-5p(1)//miR-181d-5p(1)	miR-181c-5p(1)//miR-181d-5p(1)	0.7	NA	NA	NA	NA	0	0.7
KRIT1		mmu-miR-181c(4)//mmu-miR-181d(4)	mmu-miR-181c-5p(1)//mmu-miR-181d-5p(1)		miR-181c-5p(1)//miR-181d-5p(1)	miR-181c-5p(1)//miR-181d-5p(1)	0.7	NA	NA	NA	NA	0	0.7
KSR1	mmu-miR-181c-5p(1)//mmu-miR-181d-5p(1)		mmu-miR-181c-5p(1)//mmu-miR-181d-5p(1)		miR-181c-5p(1)//miR-181d-5p(1)	miR-181c-5p(1)//miR-181d-5p(1)	0.7	NA	NA	NA	NA	0	0.7
LIFR			mmu-miR-181c-5p(1)//mmu-miR-181d-5p(1)	mmu-miR-181c(1)//mmu-miR-181d(1)	miR-181c-5p(1)//miR-181d-5p(1)	miR-181c-5p(1)//miR-181d-5p(1)	0.7	NA	NA	NA	NA	0	0.7
LMBRD1		mmu-miR-181c(1)//mmu-miR-181d(1)	mmu-miR-181c-5p(1)//mmu-miR-181d-5p(1)		miR-181c-5p(1)//miR-181d-5p(1)	miR-181c-5p(1)//miR-181d-5p(1)	0.7	NA	NA	NA	NA	0	0.7
LPCAT1	mmu-miR-181c-5p(1)//mmu-miR-181d-5p(1)		mmu-miR-181c-5p(1)//mmu-miR-181d-5p(1)		miR-181c-5p(1)//miR-181d-5p(1)	miR-181c-5p(1)//miR-181d-5p(1)	0.7	NA	NA	NA	NA	0	0.7
LTB		mmu-miR-181c(2)//mmu-miR-181d(2)	mmu-miR-181c-5p(1)//mmu-miR-181d-5p(1)		miR-181c-5p(1)//miR-181d-5p(1)	miR-181c-5p(1)//miR-181d-5p(1)	0.7	NA	NA	NA	NA	0	0.7
LUC7L2		mmu-miR-181c(1)//mmu-miR-181d(3)	mmu-miR-181c-5p(1)//mmu-miR-181d-5p(1)		miR-181c-5p(1)//miR-181d-5p(1)	miR-181c-5p(1)//miR-181d-5p(1)	0.7	NA	NA	NA	NA	0	0.7
MCL1	mmu-miR-181c-5p(1)//mmu-miR-181d-5p(1)		mmu-miR-181c-5p(1)//mmu-miR-181d-5p(1)		miR-181c-5p(1)//miR-181d-5p(1)	miR-181c-5p(1)//miR-181d-5p(1)	0.7	NA	NA	NA	NA	0	0.7
MED7		mmu-miR-181c(1)//mmu-miR-181d(1)	mmu-miR-181c-5p(1)//mmu-miR-181d-5p(1)		miR-181c-5p(1)//miR-181d-5p(1)	miR-181c-5p(1)//miR-181d-5p(1)	0.7	NA	NA	NA	NA	0	0.7
MEST		mmu-miR-181c(1)//mmu-miR-181d(1)	mmu-miR-181c-5p(1)//mmu-miR-181d-5p(1)		miR-181c-5p(1)//miR-181d-5p(1)	miR-181c-5p(1)//miR-181d-5p(1)	0.7	NA	NA	NA	NA	0	0.7
MEX3C	mmu-miR-181c-5p(1)//mmu-miR-181d-5p(1)	mmu-miR-181c(1)//mmu-miR-181d(1)			miR-181c-5p(1)//miR-181d-5p(1)	miR-181c-5p(1)//miR-181d-5p(1)	0.7	NA	NA	NA	NA	0	0.7
MFSD8		mmu-miR-181c(1)//mmu-miR-181d(1)	mmu-miR-181c-5p(1)//mmu-miR-181d-5p(1)		miR-181c-5p(1)//miR-181d-5p(1)	miR-181c-5p(1)//miR-181d-5p(1)	0.7	NA	NA	NA	NA	0	0.7
MIS12		mmu-miR-181c(1)//mmu-miR-181d(1)	mmu-miR-181c-5p(1)//mmu-miR-181d-5p(1)		miR-181c-5p(1)//miR-181d-5p(1)	miR-181c-5p(1)//miR-181d-5p(1)	0.7	NA	NA	NA	NA	0	0.7
MKLN1		mmu-miR-181c(2)//mmu-miR-181d(2)	mmu-miR-181c-5p(1)//mmu-miR-181d-5p(1)		miR-181c-5p(1)//miR-181d-5p(1)	miR-181c-5p(1)//miR-181d-5p(1)	0.7	NA	NA	NA	NA	0	0.7
MLEC		mmu-miR-181c(2)//mmu-miR-181d(1)	mmu-miR-181c-5p(1)//mmu-miR-181d-5p(1)		miR-181c-5p(1)//miR-181d-5p(1)	miR-181c-5p(1)//miR-181d-5p(1)	0.7	NA	NA	NA	NA	0	0.7
MOB1B	mmu-miR-181c-5p(1)//mmu-miR-181d-5p(1)		mmu-miR-181c-5p(1)//mmu-miR-181d-5p(1)		miR-181c-5p(1)//miR-181d-5p(1)	miR-181c-5p(1)//miR-181d-5p(1)	0.7	NA	NA	NA	NA	0	0.7
MORC3		mmu-miR-181c(2)//mmu-miR-181d(2)	mmu-miR-181c-5p(1)//mmu-miR-181d-5p(1)		miR-181c-5p(1)//miR-181d-5p(1)	miR-181c-5p(1)//miR-181d-5p(1)	0.7	NA	NA	NA	NA	0	0.7
MPP5	mmu-miR-181c-5p(2)//mmu-miR-181d-5p(2)		mmu-miR-181c-5p(1)//mmu-miR-181d-5p(1)		miR-181c-5p(1)//miR-181d-5p(1)	miR-181c-5p(1)//miR-181d-5p(1)	0.7	NA	NA	NA	NA	0	0.7
MYB		mmu-miR-181c(3)//mmu-miR-181d(3)	mmu-miR-181c-5p(1)//mmu-miR-181d-5p(1)		miR-181c-5p(1)//miR-181d-5p(1)	miR-181c-5p(1)//miR-181d-5p(1)	0.7	NA	NA	NA	NA	0	0.7
N4BP2		mmu-miR-181c(1)//mmu-miR-181d(1)	mmu-miR-181c-5p(1)//mmu-miR-181d-5p(1)		miR-181c-5p(1)//miR-181d-5p(1)	miR-181c-5p(1)//miR-181d-5p(1)	0.7	NA	NA	NA	NA	0	0.7
NACC2	mmu-miR-181c-5p(1)//mmu-miR-181d-5p(1)		mmu-miR-181c-5p(1)//mmu-miR-181d-5p(1)		miR-181c-5p(1)//miR-181d-5p(1)	miR-181c-5p(1)//miR-181d-5p(1)	0.7	NA	NA	NA	NA	0	0.7
NFIA		mmu-miR-181c(1)//mmu-miR-181d(1)	mmu-miR-181c-5p(1)//mmu-miR-181d-5p(1)		miR-181c-5p(1)//miR-181d-5p(1)	miR-181c-5p(1)//miR-181d-5p(1)	0.7	NA	NA	NA	NA	0	0.7
NPM1		mmu-miR-181c(2)//mmu-miR-181d(2)	mmu-miR-181c-5p(1)//mmu-miR-181d-5p(1)		miR-181c-5p(1)//miR-181d-5p(1)	miR-181c-5p(1)//miR-181d-5p(1)	0.7	NA	NA	NA	NA	0	0.7
NR4A3	mmu-miR-181c-5p(1)//mmu-miR-181d-5p(1)		mmu-miR-181c-5p(1)//mmu-miR-181d-5p(1)		miR-181c-5p(1)//miR-181d-5p(1)	miR-181c-5p(1)//miR-181d-5p(1)	0.7	NA	NA	NA	NA	0	0.7
NUCKS1	mmu-miR-181c-5p(1)//mmu-miR-181d-5p(1)		mmu-miR-181c-5p(1)//mmu-miR-181d-5p(1)		miR-181c-5p(1)//miR-181d-5p(1)	miR-181c-5p(1)//miR-181d-5p(1)	0.7	NA	NA	NA	NA	0	0.7
NUSAP1		mmu-miR-181c(2)//mmu-miR-181d(1)	mmu-miR-181c-5p(1)//mmu-miR-181d-5p(1)		miR-181c-5p(1)//miR-181d-5p(1)	miR-181c-5p(1)//miR-181d-5p(1)	0.7	NA	NA	NA	NA	0	0.7
PAK7	mmu-miR-181c-5p(1)//mmu-miR-181d-5p(1)	mmu-miR-181c(2)//mmu-miR-181d(3)	mmu-miR-181c-5p(1)//mmu-miR-181d-5p(1)	mmu-miR-181c(1)//mmu-miR-181d(1)	miR-181c-5p(1)		0.7	NA	NA	NA	NA	0	0.7
PCBP1		mmu-miR-181c(1)//mmu-miR-181d(1)	mmu-miR-181c-5p(1)//mmu-miR-181d-5p(1)		miR-181c-5p(1)//miR-181d-5p(1)	miR-181c-5p(1)//miR-181d-5p(1)	0.7	NA	NA	NA	NA	0	0.7
PDCD4	mmu-miR-181c-5p(1)//mmu-miR-181d-5p(1)		mmu-miR-181c-5p(1)//mmu-miR-181d-5p(1)		miR-181c-5p(1)//miR-181d-5p(1)	miR-181c-5p(1)//miR-181d-5p(1)	0.7	NA	NA	NA	NA	0	0.7
PDIA6		mmu-miR-181c(1)//mmu-miR-181d(2)	mmu-miR-181c-5p(1)//mmu-miR-181d-5p(1)		miR-181c-5p(1)//miR-181d-5p(1)	miR-181c-5p(1)//miR-181d-5p(1)	0.7	NA	NA	NA	NA	0	0.7
PHC3	mmu-miR-181c-5p(1)//mmu-miR-181d-5p(1)		mmu-miR-181c-5p(1)//mmu-miR-181d-5p(1)		miR-181c-5p(1)//miR-181d-5p(1)	miR-181c-5p(1)//miR-181d-5p(1)	0.7	NA	NA	NA	NA	0	0.7
PKN2	mmu-miR-181c-5p(1)//mmu-miR-181d-5p(1)		mmu-miR-181c-5p(1)//mmu-miR-181d-5p(1)		miR-181c-5p(1)//miR-181d-5p(1)	miR-181c-5p(1)//miR-181d-5p(1)	0.7	NA	NA	NA	NA	0	0.7
PNPLA8		mmu-miR-181c(2)//mmu-miR-181d(2)	mmu-miR-181c-5p(1)//mmu-miR-181d-5p(1)		miR-181c-5p(1)//miR-181d-5p(1)	miR-181c-5p(1)//miR-181d-5p(1)	0.7	NA	NA	NA	NA	0	0.7
PPM1K		mmu-miR-181c(2)//mmu-miR-181d(2)	mmu-miR-181c-5p(1)//mmu-miR-181d-5p(1)		miR-181c-5p(1)//miR-181d-5p(1)	miR-181c-5p(1)//miR-181d-5p(1)	0.7	NA	NA	NA	NA	0	0.7
PPP6C	mmu-miR-181c-5p(1)//mmu-miR-181d-5p(1)		mmu-miR-181c-5p(1)//mmu-miR-181d-5p(1)		miR-181c-5p(1)//miR-181d-5p(1)	miR-181c-5p(1)//miR-181d-5p(1)	0.7	NA	NA	NA	NA	0	0.7
PRKCE	mmu-miR-181c-5p(1)//mmu-miR-181d-5p(1)		mmu-miR-181c-5p(1)//mmu-miR-181d-5p(1)		miR-181c-5p(1)//miR-181d-5p(1)	miR-181c-5p(1)//miR-181d-5p(1)	0.7	NA	NA	NA	NA	0	0.7
PUM1	mmu-miR-181c-5p(1)//mmu-miR-181d-5p(1)		mmu-miR-181c-5p(1)//mmu-miR-181d-5p(1)		miR-181c-5p(1)//miR-181d-5p(1)	miR-181c-5p(1)//miR-181d-5p(1)	0.7	NA	NA	NA	NA	0	0.7
PURB	mmu-miR-181c-5p(1)//mmu-miR-181d-5p(1)		mmu-miR-181c-5p(1)//mmu-miR-181d-5p(1)		miR-181c-5p(1)//miR-181d-5p(1)	miR-181c-5p(1)//miR-181d-5p(1)	0.7	NA	NA	NA	NA	0	0.7
PXK		mmu-miR-181c(2)//mmu-miR-181d(2)	mmu-miR-181c-5p(1)//mmu-miR-181d-5p(1)		miR-181c-5p(1)//miR-181d-5p(1)	miR-181c-5p(1)//miR-181d-5p(1)	0.7	NA	NA	NA	NA	0	0.7
RASA2	mmu-miR-181c-5p(1)//mmu-miR-181d-5p(1)		mmu-miR-181c-5p(1)//mmu-miR-181d-5p(1)		miR-181c-5p(1)//miR-181d-5p(1)	miR-181c-5p(1)//miR-181d-5p(1)	0.7	NA	NA	NA	NA	0	0.7
RCOR1	mmu-miR-181c-5p(2)//mmu-miR-181d-5p(2)		mmu-miR-181c-5p(1)//mmu-miR-181d-5p(1)		miR-181c-5p(1)//miR-181d-5p(1)	miR-181c-5p(1)//miR-181d-5p(1)	0.7	NA	NA	NA	NA	0	0.7
SBNO1		mmu-miR-181c(2)//mmu-miR-181d(1)	mmu-miR-181c-5p(1)//mmu-miR-181d-5p(1)		miR-181c-5p(1)//miR-181d-5p(1)	miR-181c-5p(1)//miR-181d-5p(1)	0.7	NA	NA	NA	NA	0	0.7
SCAMP2		mmu-miR-181c(1)//mmu-miR-181d(1)	mmu-miR-181c-5p(1)//mmu-miR-181d-5p(1)		miR-181c-5p(1)//miR-181d-5p(1)	miR-181c-5p(1)//miR-181d-5p(1)	0.7	NA	NA	NA	NA	0	0.7
SDCBP		mmu-miR-181c(3)//mmu-miR-181d(3)	mmu-miR-181c-5p(1)//mmu-miR-181d-5p(1)		miR-181c-5p(1)//miR-181d-5p(1)	miR-181c-5p(1)//miR-181d-5p(1)	0.7	NA	NA	NA	NA	0	0.7
SDHA		mmu-miR-181c(1)//mmu-miR-181d(1)	mmu-miR-181c-5p(1)//mmu-miR-181d-5p(1)		miR-181c-5p(1)//miR-181d-5p(1)	miR-181c-5p(1)//miR-181d-5p(1)	0.7	NA	NA	NA	NA	0	0.7
SENP7		mmu-miR-181c(1)//mmu-miR-181d(1)	mmu-miR-181c-5p(1)//mmu-miR-181d-5p(1)		miR-181c-5p(1)//miR-181d-5p(1)	miR-181c-5p(1)//miR-181d-5p(1)	0.7	NA	NA	NA	NA	0	0.7
SLC19A2		mmu-miR-181c(1)//mmu-miR-181d(1)	mmu-miR-181c-5p(1)//mmu-miR-181d-5p(1)		miR-181c-5p(1)//miR-181d-5p(1)	miR-181c-5p(1)//miR-181d-5p(1)	0.7	NA	NA	NA	NA	0	0.7
SLC25A32		mmu-miR-181c(1)//mmu-miR-181d(2)	mmu-miR-181c-5p(1)//mmu-miR-181d-5p(1)		miR-181c-5p(1)//miR-181d-5p(1)	miR-181c-5p(1)//miR-181d-5p(1)	0.7	NA	NA	NA	NA	0	0.7
SLC2A3	mmu-miR-181c-5p(1)//mmu-miR-181d-5p(1)		mmu-miR-181c-5p(1)//mmu-miR-181d-5p(1)		miR-181c-5p(1)//miR-181d-5p(1)	miR-181c-5p(1)//miR-181d-5p(1)	0.7	NA	NA	NA	NA	0	0.7
SLC7A11		mmu-miR-181c(1)//mmu-miR-181d(1)	mmu-miR-181c-5p(1)//mmu-miR-181d-5p(1)		miR-181c-5p(1)//miR-181d-5p(1)	miR-181c-5p(1)//miR-181d-5p(1)	0.7	NA	NA	NA	NA	0	0.7
SMARCA5		mmu-miR-181c(1)//mmu-miR-181d(2)	mmu-miR-181c-5p(1)//mmu-miR-181d-5p(1)		miR-181c-5p(1)//miR-181d-5p(1)	miR-181c-5p(1)//miR-181d-5p(1)	0.7	NA	NA	NA	NA	0	0.7
SMG7	mmu-miR-181c-5p(1)//mmu-miR-181d-5p(1)		mmu-miR-181c-5p(1)//mmu-miR-181d-5p(1)		miR-181c-5p(1)//miR-181d-5p(1)	miR-181c-5p(1)//miR-181d-5p(1)	0.7	NA	NA	NA	NA	0	0.7
SOAT1		mmu-miR-181c(1)//mmu-miR-181d(2)	mmu-miR-181c-5p(1)//mmu-miR-181d-5p(1)		miR-181c-5p(1)//miR-181d-5p(1)	miR-181c-5p(1)//miR-181d-5p(1)	0.7	NA	NA	NA	NA	0	0.7
SOCS5		mmu-miR-181c(2)//mmu-miR-181d(1)	mmu-miR-181c-5p(1)//mmu-miR-181d-5p(1)		miR-181c-5p(1)//miR-181d-5p(1)	miR-181c-5p(1)//miR-181d-5p(1)	0.7	NA	NA	NA	NA	0	0.7
SON		mmu-miR-181c(2)//mmu-miR-181d(2)	mmu-miR-181c-5p(1)//mmu-miR-181d-5p(1)		miR-181c-5p(1)//miR-181d-5p(1)	miR-181c-5p(1)//miR-181d-5p(1)	0.7	NA	NA	NA	NA	0	0.7
SPRED1		mmu-miR-181c(1)//mmu-miR-181d(1)	mmu-miR-181c-5p(1)//mmu-miR-181d-5p(1)		miR-181c-5p(1)//miR-181d-5p(1)	miR-181c-5p(1)//miR-181d-5p(1)	0.7	NA	NA	NA	NA	0	0.7
SPTY2D1	mmu-miR-181c-5p(1)//mmu-miR-181d-5p(1)		mmu-miR-181c-5p(1)//mmu-miR-181d-5p(1)		miR-181c-5p(1)//miR-181d-5p(1)	miR-181c-5p(1)//miR-181d-5p(1)	0.7	NA	NA	NA	NA	0	0.7
SRSF7	mmu-miR-181c-5p(1)//mmu-miR-181d-5p(1)		mmu-miR-181c-5p(1)//mmu-miR-181d-5p(1)		miR-181c-5p(1)//miR-181d-5p(1)	miR-181c-5p(1)//miR-181d-5p(1)	0.7	NA	NA	NA	NA	0	0.7
SSB		mmu-miR-181c(1)//mmu-miR-181d(1)	mmu-miR-181c-5p(1)//mmu-miR-181d-5p(1)		miR-181c-5p(1)//miR-181d-5p(1)	miR-181c-5p(1)//miR-181d-5p(1)	0.7	NA	NA	NA	NA	0	0.7
SWAP70		mmu-miR-181c(1)//mmu-miR-181d(1)	mmu-miR-181c-5p(1)//mmu-miR-181d-5p(1)		miR-181c-5p(1)//miR-181d-5p(1)	miR-181c-5p(1)//miR-181d-5p(1)	0.7	NA	NA	NA	NA	0	0.7
TAF2		mmu-miR-181c(2)//mmu-miR-181d(2)	mmu-miR-181c-5p(1)//mmu-miR-181d-5p(1)		miR-181c-5p(1)//miR-181d-5p(1)	miR-181c-5p(1)//miR-181d-5p(1)	0.7	NA	NA	NA	NA	0	0.7
TAF5		mmu-miR-181c(1)//mmu-miR-181d(1)	mmu-miR-181c-5p(1)//mmu-miR-181d-5p(1)		miR-181c-5p(1)//miR-181d-5p(1)	miR-181c-5p(1)//miR-181d-5p(1)	0.7	NA	NA	NA	NA	0	0.7
TMEM168		mmu-miR-181c(1)//mmu-miR-181d(1)	mmu-miR-181c-5p(1)//mmu-miR-181d-5p(1)		miR-181c-5p(1)//miR-181d-5p(1)	miR-181c-5p(1)//miR-181d-5p(1)	0.7	NA	NA	NA	NA	0	0.7
TMEM9B	mmu-miR-181c-5p(1)//mmu-miR-181d-5p(1)		mmu-miR-181c-5p(1)//mmu-miR-181d-5p(1)		miR-181c-5p(1)//miR-181d-5p(1)	miR-181c-5p(1)//miR-181d-5p(1)	0.7	NA	NA	NA	NA	0	0.7
TMX3		mmu-miR-181c(1)//mmu-miR-181d(1)	mmu-miR-181c-5p(1)//mmu-miR-181d-5p(1)		miR-181c-5p(1)//miR-181d-5p(1)	miR-181c-5p(1)//miR-181d-5p(1)	0.7	NA	NA	NA	NA	0	0.7
TRIM33		mmu-miR-181c(1)//mmu-miR-181d(1)	mmu-miR-181c-5p(1)//mmu-miR-181d-5p(1)		miR-181c-5p(1)//miR-181d-5p(1)	miR-181c-5p(1)//miR-181d-5p(1)	0.7	NA	NA	NA	NA	0	0.7
TRP53INP1		mmu-miR-181c(1)//mmu-miR-181d(1)	mmu-miR-181c-5p(1)//mmu-miR-181d-5p(1)		miR-181c-5p(1)//miR-181d-5p(1)	miR-181c-5p(1)//miR-181d-5p(1)	0.7	NA	NA	NA	NA	0	0.7
TWISTNB		mmu-miR-181c(1)//mmu-miR-181d(1)	mmu-miR-181c-5p(1)//mmu-miR-181d-5p(1)		miR-181c-5p(1)//miR-181d-5p(1)	miR-181c-5p(1)//miR-181d-5p(1)	0.7	NA	NA	NA	NA	0	0.7
UBE3A		mmu-miR-181c(1)//mmu-miR-181d(2)	mmu-miR-181c-5p(1)//mmu-miR-181d-5p(1)		miR-181c-5p(1)//miR-181d-5p(1)	miR-181c-5p(1)//miR-181d-5p(1)	0.7	NA	NA	NA	NA	0	0.7
UBR3		mmu-miR-181c(1)//mmu-miR-181d(1)	mmu-miR-181c-5p(1)//mmu-miR-181d-5p(1)		miR-181c-5p(1)//miR-181d-5p(1)	miR-181c-5p(1)//miR-181d-5p(1)	0.7	NA	NA	NA	NA	0	0.7
USP31	mmu-miR-181c-5p(1)//mmu-miR-181d-5p(1)		mmu-miR-181c-5p(1)//mmu-miR-181d-5p(1)		miR-181c-5p(1)//miR-181d-5p(1)	miR-181c-5p(1)//miR-181d-5p(1)	0.7	NA	NA	NA	NA	0	0.7
VKORC1L1	mmu-miR-181c-5p(1)//mmu-miR-181d-5p(1)		mmu-miR-181c-5p(1)//mmu-miR-181d-5p(1)		miR-181c-5p(1)//miR-181d-5p(1)	miR-181c-5p(1)//miR-181d-5p(1)	0.7	NA	NA	NA	NA	0	0.7
WDR26			mmu-miR-181c-5p(1)//mmu-miR-181d-5p(1)	mmu-miR-181c(1)//mmu-miR-181d(1)	miR-181c-5p(1)//miR-181d-5p(1)	miR-181c-5p(1)//miR-181d-5p(1)	0.7	NA	NA	NA	NA	0	0.7
YIPF4		mmu-miR-181c(1)//mmu-miR-181d(1)	mmu-miR-181c-5p(1)//mmu-miR-181d-5p(1)		miR-181c-5p(1)//miR-181d-5p(1)	miR-181c-5p(1)//miR-181d-5p(1)	0.7	NA	NA	NA	NA	0	0.7
ZDHHC21		mmu-miR-181c(3)//mmu-miR-181d(3)	mmu-miR-181c-5p(1)//mmu-miR-181d-5p(1)		miR-181c-5p(1)//miR-181d-5p(1)	miR-181c-5p(1)//miR-181d-5p(1)	0.7	NA	NA	NA	NA	0	0.7
ZFAND3		mmu-miR-181c(2)//mmu-miR-181d(2)	mmu-miR-181c-5p(1)//mmu-miR-181d-5p(1)		miR-181c-5p(1)//miR-181d-5p(1)	miR-181c-5p(1)//miR-181d-5p(1)	0.7	NA	NA	NA	NA	0	0.7
ZFP260		mmu-miR-181c(1)//mmu-miR-181d(1)	mmu-miR-181c-5p(1)//mmu-miR-181d-5p(1)		miR-181c-5p(1)//miR-181d-5p(1)	miR-181c-5p(1)//miR-181d-5p(1)	0.7	NA	NA	NA	NA	0	0.7
ZFP281		mmu-miR-181c(2)//mmu-miR-181d(2)	mmu-miR-181c-5p(1)//mmu-miR-181d-5p(1)		miR-181c-5p(1)//miR-181d-5p(1)	miR-181c-5p(1)//miR-181d-5p(1)	0.7	NA	NA	NA	NA	0	0.7
ZFP62		mmu-miR-181c(1)//mmu-miR-181d(1)	mmu-miR-181c-5p(1)//mmu-miR-181d-5p(1)		miR-181c-5p(1)//miR-181d-5p(1)	miR-181c-5p(1)//miR-181d-5p(1)	0.7	NA	NA	NA	NA	0	0.7
ZFP652		mmu-miR-181c(1)//mmu-miR-181d(1)	mmu-miR-181c-5p(1)//mmu-miR-181d-5p(1)		miR-181c-5p(1)//miR-181d-5p(1)	miR-181c-5p(1)//miR-181d-5p(1)	0.7	NA	NA	NA	NA	0	0.7
ZFP740		mmu-miR-181c(2)//mmu-miR-181d(2)	mmu-miR-181c-5p(1)//mmu-miR-181d-5p(1)		miR-181c-5p(1)//miR-181d-5p(1)	miR-181c-5p(1)//miR-181d-5p(1)	0.7	NA	NA	NA	NA	0	0.7
ZFP763		mmu-miR-181c(1)//mmu-miR-181d(1)	mmu-miR-181c-5p(1)//mmu-miR-181d-5p(1)		miR-181c-5p(1)//miR-181d-5p(1)	miR-181c-5p(1)//miR-181d-5p(1)	0.7	NA	NA	NA	NA	0	0.7
ZNRF2	mmu-miR-181c-5p(1)//mmu-miR-181d-5p(1)		mmu-miR-181c-5p(1)//mmu-miR-181d-5p(1)		miR-181c-5p(1)//miR-181d-5p(1)	miR-181c-5p(1)//miR-181d-5p(1)	0.7	NA	NA	NA	NA	0	0.7
ZYG11B		mmu-miR-181c(1)//mmu-miR-181d(1)	mmu-miR-181c-5p(1)//mmu-miR-181d-5p(1)		miR-181c-5p(1)//miR-181d-5p(1)	miR-181c-5p(1)//miR-181d-5p(1)	0.7	NA	NA	NA	NA	0	0.7
ATP11A	mmu-miR-181c-5p(1)//mmu-miR-181d-5p(1)	mmu-miR-181c(3)		mmu-miR-181c(1)//mmu-miR-181d(1)	miR-181d-5p(1)	miR-181c-5p(1)//miR-181d-5p(1)	0.675	NA	NA	NA	NA	0	0.675
GNB4	mmu-miR-181c-5p(1)//mmu-miR-181d-5p(1)	mmu-miR-181d(1)	mmu-miR-181c-5p(1)//mmu-miR-181d-5p(1)		miR-181c-5p(1)	miR-181c-5p(1)//miR-181d-5p(1)	0.675	NA	NA	NA	NA	0	0.675
HEXIM1	mmu-miR-181c-5p(1)//mmu-miR-181d-5p(1)	mmu-miR-181d(1)	mmu-miR-181c-5p(1)//mmu-miR-181d-5p(1)		miR-181c-5p(1)	miR-181c-5p(1)//miR-181d-5p(1)	0.675	NA	NA	NA	NA	0	0.675
IQGAP2	mmu-miR-181c-5p(1)//mmu-miR-181d-5p(1)	mmu-miR-181d(1)	mmu-miR-181c-5p(1)//mmu-miR-181d-5p(1)		miR-181d-5p(1)	miR-181c-5p(1)//miR-181d-5p(1)	0.675	NA	NA	NA	NA	0	0.675
MAP3K10	mmu-miR-181c-5p(1)//mmu-miR-181d-5p(1)		mmu-miR-181c-5p(1)	mmu-miR-181c(1)//mmu-miR-181d(1)	miR-181c-5p(1)	miR-181c-5p(1)//miR-181d-5p(1)	0.675	NA	NA	NA	NA	0	0.675
SLC7A6OS	mmu-miR-181c-5p(1)//mmu-miR-181d-5p(1)	mmu-miR-181c(1)	mmu-miR-181c-5p(1)//mmu-miR-181d-5p(1)		miR-181d-5p(1)	miR-181c-5p(1)//miR-181d-5p(1)	0.675	NA	NA	NA	NA	0	0.675
ACAP2	mmu-miR-181c-5p(2)//mmu-miR-181d-5p(2)	mmu-miR-181c(2)//mmu-miR-181d(4)	mmu-miR-181c-5p(1)//mmu-miR-181d-5p(1)			miR-181c-5p(1)//miR-181d-5p(1)	0.65	NA	NA	NA	NA	0	0.65
ACER3	mmu-miR-181c-5p(1)//mmu-miR-181d-5p(1)	mmu-miR-181c(1)//mmu-miR-181d(1)	mmu-miR-181c-5p(1)//mmu-miR-181d-5p(1)			miR-181c-5p(1)//miR-181d-5p(1)	0.65	NA	NA	NA	NA	0	0.65
ACTL6A		mmu-miR-181c(2)//mmu-miR-181d(2)	mmu-miR-181c-5p(1)//mmu-miR-181d-5p(1)	mmu-miR-181c(1)//mmu-miR-181d(1)		miR-181c-5p(1)//miR-181d-5p(1)	0.65	NA	NA	NA	NA	0	0.65
ADCY1	mmu-miR-181c-5p(1)//mmu-miR-181d-5p(1)		mmu-miR-181c-5p(1)//mmu-miR-181d-5p(1)	mmu-miR-181c(1)//mmu-miR-181d(1)		miR-181c-5p(1)//miR-181d-5p(1)	0.65	NA	NA	NA	NA	0	0.65
AFAP1		mmu-miR-181c(1)//mmu-miR-181d(1)	mmu-miR-181c-5p(1)//mmu-miR-181d-5p(1)	mmu-miR-181c(1)//mmu-miR-181d(1)		miR-181c-5p(1)//miR-181d-5p(1)	0.65	NA	NA	NA	NA	0	0.65
AKAP2		mmu-miR-181c(2)//mmu-miR-181d(2)	mmu-miR-181c-5p(1)//mmu-miR-181d-5p(1)	mmu-miR-181c(1)//mmu-miR-181d(1)		miR-181c-5p(1)//miR-181d-5p(1)	0.65	NA	NA	NA	NA	0	0.65
ANAPC16	mmu-miR-181c-5p(2)//mmu-miR-181d-5p(2)	mmu-miR-181c(2)//mmu-miR-181d(2)	mmu-miR-181c-5p(1)//mmu-miR-181d-5p(1)			miR-181c-5p(1)//miR-181d-5p(1)	0.65	NA	NA	NA	NA	0	0.65
ANXA11		mmu-miR-181c(2)//mmu-miR-181d(1)	mmu-miR-181c-5p(1)//mmu-miR-181d-5p(1)	mmu-miR-181c(1)//mmu-miR-181d(1)		miR-181c-5p(1)//miR-181d-5p(1)	0.65	NA	NA	NA	NA	0	0.65
API5		mmu-miR-181c(2)//mmu-miR-181d(4)	mmu-miR-181c-5p(1)//mmu-miR-181d-5p(1)	mmu-miR-181c(1)//mmu-miR-181d(1)		miR-181c-5p(1)//miR-181d-5p(1)	0.65	NA	NA	NA	NA	0	0.65
AR	mmu-miR-181c-5p(1)//mmu-miR-181d-5p(1)	mmu-miR-181c(1)//mmu-miR-181d(1)	mmu-miR-181c-5p(1)//mmu-miR-181d-5p(1)			miR-181c-5p(1)//miR-181d-5p(1)	0.65	NA	NA	NA	NA	0	0.65
ARFGEF2		mmu-miR-181c(1)//mmu-miR-181d(1)	mmu-miR-181c-5p(1)//mmu-miR-181d-5p(1)	mmu-miR-181c(1)//mmu-miR-181d(1)		miR-181c-5p(1)//miR-181d-5p(1)	0.65	NA	NA	NA	NA	0	0.65
ARHGEF7		mmu-miR-181c(3)//mmu-miR-181d(4)	mmu-miR-181c-5p(1)//mmu-miR-181d-5p(1)	mmu-miR-181c(1)//mmu-miR-181d(1)		miR-181c-5p(1)//miR-181d-5p(1)	0.65	NA	NA	NA	NA	0	0.65
ARMC1	mmu-miR-181c-5p(1)//mmu-miR-181d-5p(1)	mmu-miR-181c(2)//mmu-miR-181d(2)	mmu-miR-181c-5p(1)//mmu-miR-181d-5p(1)			miR-181c-5p(1)//miR-181d-5p(1)	0.65	NA	NA	NA	NA	0	0.65
ASAH2	mmu-miR-181c-5p(1)//mmu-miR-181d-5p(1)	mmu-miR-181c(2)//mmu-miR-181d(3)	mmu-miR-181c-5p(1)//mmu-miR-181d-5p(1)			miR-181c-5p(1)//miR-181d-5p(1)	0.65	NA	NA	NA	NA	0	0.65
ATG5		mmu-miR-181c(2)//mmu-miR-181d(2)	mmu-miR-181c-5p(1)//mmu-miR-181d-5p(1)	mmu-miR-181c(1)//mmu-miR-181d(1)		miR-181c-5p(1)//miR-181d-5p(1)	0.65	NA	NA	NA	NA	0	0.65
BAIAP2		mmu-miR-181c(2)//mmu-miR-181d(2)	mmu-miR-181c-5p(1)//mmu-miR-181d-5p(1)	mmu-miR-181c(1)//mmu-miR-181d(1)		miR-181c-5p(1)//miR-181d-5p(1)	0.65	NA	NA	NA	NA	0	0.65
BAZ1A	mmu-miR-181c-5p(1)//mmu-miR-181d-5p(1)	mmu-miR-181c(1)//mmu-miR-181d(1)	mmu-miR-181c-5p(1)//mmu-miR-181d-5p(1)			miR-181c-5p(1)//miR-181d-5p(1)	0.65	NA	NA	NA	NA	0	0.65
BEND3	mmu-miR-181c-5p(3)//mmu-miR-181d-5p(3)	mmu-miR-181c(3)//mmu-miR-181d(3)	mmu-miR-181c-5p(1)//mmu-miR-181d-5p(1)			miR-181c-5p(1)//miR-181d-5p(1)	0.65	NA	NA	NA	NA	0	0.65
BRAF	mmu-miR-181c-5p(1)//mmu-miR-181d-5p(1)		mmu-miR-181c-5p(1)//mmu-miR-181d-5p(1)	mmu-miR-181c(1)//mmu-miR-181d(1)		miR-181c-5p(1)//miR-181d-5p(1)	0.65	NA	NA	NA	NA	0	0.65
BTAF1		mmu-miR-181c(1)//mmu-miR-181d(1)	mmu-miR-181c-5p(1)//mmu-miR-181d-5p(1)	mmu-miR-181c(1)//mmu-miR-181d(1)		miR-181c-5p(1)//miR-181d-5p(1)	0.65	NA	NA	NA	NA	0	0.65
BTBD1	mmu-miR-181c-5p(1)//mmu-miR-181d-5p(1)	mmu-miR-181c(1)//mmu-miR-181d(1)	mmu-miR-181c-5p(1)//mmu-miR-181d-5p(1)			miR-181c-5p(1)//miR-181d-5p(1)	0.65	NA	NA	NA	NA	0	0.65
BTC		mmu-miR-181c(2)//mmu-miR-181d(1)	mmu-miR-181c-5p(1)//mmu-miR-181d-5p(1)	mmu-miR-181c(1)//mmu-miR-181d(1)		miR-181c-5p(1)//miR-181d-5p(1)	0.65	NA	NA	NA	NA	0	0.65
CAMSAP1	mmu-miR-181c-5p(1)//mmu-miR-181d-5p(1)	mmu-miR-181c(1)//mmu-miR-181d(1)	mmu-miR-181c-5p(1)//mmu-miR-181d-5p(1)			miR-181c-5p(1)//miR-181d-5p(1)	0.65	NA	NA	NA	NA	0	0.65
CAR11		mmu-miR-181c(1)//mmu-miR-181d(1)	mmu-miR-181c-5p(1)//mmu-miR-181d-5p(1)	mmu-miR-181c(1)//mmu-miR-181d(1)		miR-181c-5p(1)//miR-181d-5p(1)	0.65	NA	NA	NA	NA	0	0.65
CBFA2T2	mmu-miR-181c-5p(1)//mmu-miR-181d-5p(1)	mmu-miR-181c(1)//mmu-miR-181d(1)	mmu-miR-181c-5p(1)//mmu-miR-181d-5p(1)			miR-181c-5p(1)//miR-181d-5p(1)	0.65	NA	NA	NA	NA	0	0.65
CBFA2T3	mmu-miR-181c-5p(1)//mmu-miR-181d-5p(1)		mmu-miR-181c-5p(1)//mmu-miR-181d-5p(1)	mmu-miR-181c(1)//mmu-miR-181d(1)		miR-181c-5p(1)//miR-181d-5p(1)	0.65	NA	NA	NA	NA	0	0.65
CCDC117		mmu-miR-181c(1)//mmu-miR-181d(1)	mmu-miR-181c-5p(1)//mmu-miR-181d-5p(1)	mmu-miR-181c(1)//mmu-miR-181d(1)		miR-181c-5p(1)//miR-181d-5p(1)	0.65	NA	NA	NA	NA	0	0.65
CCDC50		mmu-miR-181c(1)//mmu-miR-181d(2)	mmu-miR-181c-5p(1)//mmu-miR-181d-5p(1)	mmu-miR-181c(1)//mmu-miR-181d(1)		miR-181c-5p(1)//miR-181d-5p(1)	0.65	NA	NA	NA	NA	0	0.65
CCDC6	mmu-miR-181c-5p(1)//mmu-miR-181d-5p(1)		mmu-miR-181c-5p(1)//mmu-miR-181d-5p(1)	mmu-miR-181c(1)//mmu-miR-181d(1)		miR-181c-5p(1)//miR-181d-5p(1)	0.65	NA	NA	NA	NA	0	0.65
CCL7	mmu-miR-181c-5p(1)//mmu-miR-181d-5p(1)	mmu-miR-181c(1)//mmu-miR-181d(1)	mmu-miR-181c-5p(1)//mmu-miR-181d-5p(1)			miR-181c-5p(1)//miR-181d-5p(1)	0.65	NA	NA	NA	NA	0	0.65
CD47	mmu-miR-181c-5p(1)//mmu-miR-181d-5p(1)	mmu-miR-181c(1)//mmu-miR-181d(1)	mmu-miR-181c-5p(1)//mmu-miR-181d-5p(1)			miR-181c-5p(1)//miR-181d-5p(1)	0.65	NA	NA	NA	NA	0	0.65
CD69	mmu-miR-181c-5p(1)//mmu-miR-181d-5p(1)	mmu-miR-181c(1)//mmu-miR-181d(1)	mmu-miR-181c-5p(1)//mmu-miR-181d-5p(1)			miR-181c-5p(1)//miR-181d-5p(1)	0.65	NA	NA	NA	NA	0	0.65
CDC42BPA	mmu-miR-181c-5p(1)//mmu-miR-181d-5p(1)	mmu-miR-181c(2)//mmu-miR-181d(2)	mmu-miR-181c-5p(1)//mmu-miR-181d-5p(1)			miR-181c-5p(1)//miR-181d-5p(1)	0.65	NA	NA	NA	NA	0	0.65
CDK8	mmu-miR-181c-5p(1)//mmu-miR-181d-5p(1)	mmu-miR-181c(1)//mmu-miR-181d(1)	mmu-miR-181c-5p(1)//mmu-miR-181d-5p(1)			miR-181c-5p(1)//miR-181d-5p(1)	0.65	NA	NA	NA	NA	0	0.65
CDYL	mmu-miR-181c-5p(1)//mmu-miR-181d-5p(1)		mmu-miR-181c-5p(1)//mmu-miR-181d-5p(1)	mmu-miR-181c(1)//mmu-miR-181d(1)		miR-181c-5p(1)//miR-181d-5p(1)	0.65	NA	NA	NA	NA	0	0.65
CECR2	mmu-miR-181c-5p(1)//mmu-miR-181d-5p(1)	mmu-miR-181c(2)//mmu-miR-181d(1)	mmu-miR-181c-5p(1)//mmu-miR-181d-5p(1)			miR-181c-5p(1)//miR-181d-5p(1)	0.65	NA	NA	NA	NA	0	0.65
CENPB		mmu-miR-181c(1)//mmu-miR-181d(1)	mmu-miR-181c-5p(1)//mmu-miR-181d-5p(1)	mmu-miR-181c(1)//mmu-miR-181d(1)		miR-181c-5p(1)//miR-181d-5p(1)	0.65	NA	NA	NA	NA	0	0.65
CLDN12		mmu-miR-181c(1)//mmu-miR-181d(1)	mmu-miR-181c-5p(1)//mmu-miR-181d-5p(1)	mmu-miR-181c(1)//mmu-miR-181d(1)		miR-181c-5p(1)//miR-181d-5p(1)	0.65	NA	NA	NA	NA	0	0.65
COL12A1		mmu-miR-181c(1)//mmu-miR-181d(1)	mmu-miR-181c-5p(1)//mmu-miR-181d-5p(1)	mmu-miR-181c(1)//mmu-miR-181d(1)	miR-181c-5p(1)//miR-181d-5p(1)		0.65	NA	NA	NA	NA	0	0.65
CREBZF		mmu-miR-181c(1)//mmu-miR-181d(2)	mmu-miR-181c-5p(1)//mmu-miR-181d-5p(1)	mmu-miR-181c(1)//mmu-miR-181d(1)		miR-181c-5p(1)//miR-181d-5p(1)	0.65	NA	NA	NA	NA	0	0.65
CSNK2A2	mmu-miR-181c-5p(1)//mmu-miR-181d-5p(1)	mmu-miR-181c(2)//mmu-miR-181d(2)	mmu-miR-181c-5p(1)//mmu-miR-181d-5p(1)			miR-181c-5p(1)//miR-181d-5p(1)	0.65	NA	NA	NA	NA	0	0.65
CTCF		mmu-miR-181c(1)//mmu-miR-181d(1)	mmu-miR-181c-5p(1)//mmu-miR-181d-5p(1)	mmu-miR-181c(1)//mmu-miR-181d(1)		miR-181c-5p(1)//miR-181d-5p(1)	0.65	NA	NA	NA	NA	0	0.65
CXXC5	mmu-miR-181c-5p(1)//mmu-miR-181d-5p(1)	mmu-miR-181c(2)//mmu-miR-181d(2)	mmu-miR-181c-5p(1)//mmu-miR-181d-5p(1)			miR-181c-5p(1)//miR-181d-5p(1)	0.65	NA	NA	NA	NA	0	0.65
D230025D16RIK		mmu-miR-181c(2)//mmu-miR-181d(2)	mmu-miR-181c-5p(1)//mmu-miR-181d-5p(1)	mmu-miR-181c(1)//mmu-miR-181d(1)		miR-181c-5p(1)//miR-181d-5p(1)	0.65	NA	NA	NA	NA	0	0.65
D630045J12RIK	mmu-miR-181c-5p(1)//mmu-miR-181d-5p(1)	mmu-miR-181c(4)//mmu-miR-181d(4)	mmu-miR-181c-5p(1)//mmu-miR-181d-5p(1)			miR-181c-5p(1)//miR-181d-5p(1)	0.65	NA	NA	NA	NA	0	0.65
DDX55	mmu-miR-181c-5p(1)//mmu-miR-181d-5p(1)	mmu-miR-181c(1)//mmu-miR-181d(1)	mmu-miR-181c-5p(1)//mmu-miR-181d-5p(1)			miR-181c-5p(1)//miR-181d-5p(1)	0.65	NA	NA	NA	NA	0	0.65
DEPDC1B	mmu-miR-181c-5p(1)//mmu-miR-181d-5p(1)	mmu-miR-181c(2)//mmu-miR-181d(2)	mmu-miR-181c-5p(1)//mmu-miR-181d-5p(1)			miR-181c-5p(1)//miR-181d-5p(1)	0.65	NA	NA	NA	NA	0	0.65
DHX57	mmu-miR-181c-5p(1)//mmu-miR-181d-5p(1)	mmu-miR-181c(1)//mmu-miR-181d(1)	mmu-miR-181c-5p(1)//mmu-miR-181d-5p(1)			miR-181c-5p(1)//miR-181d-5p(1)	0.65	NA	NA	NA	NA	0	0.65
DIO2		mmu-miR-181c(2)//mmu-miR-181d(2)	mmu-miR-181c-5p(1)//mmu-miR-181d-5p(1)	mmu-miR-181c(1)//mmu-miR-181d(1)		miR-181c-5p(1)//miR-181d-5p(1)	0.65	NA	NA	NA	NA	0	0.65
DIP2A	mmu-miR-181c-5p(1)//mmu-miR-181d-5p(1)	mmu-miR-181c(2)//mmu-miR-181d(2)	mmu-miR-181c-5p(1)//mmu-miR-181d-5p(1)			miR-181c-5p(1)//miR-181d-5p(1)	0.65	NA	NA	NA	NA	0	0.65
DNAJA1		mmu-miR-181c(1)//mmu-miR-181d(1)	mmu-miR-181c-5p(1)//mmu-miR-181d-5p(1)	mmu-miR-181c(1)//mmu-miR-181d(1)		miR-181c-5p(1)//miR-181d-5p(1)	0.65	NA	NA	NA	NA	0	0.65
DNAJA3	mmu-miR-181c-5p(1)//mmu-miR-181d-5p(1)	mmu-miR-181c(2)//mmu-miR-181d(2)	mmu-miR-181c-5p(1)//mmu-miR-181d-5p(1)			miR-181c-5p(1)//miR-181d-5p(1)	0.65	NA	NA	NA	NA	0	0.65
DNAJA4	mmu-miR-181c-5p(1)//mmu-miR-181d-5p(1)	mmu-miR-181c(1)//mmu-miR-181d(1)	mmu-miR-181c-5p(1)//mmu-miR-181d-5p(1)			miR-181c-5p(1)//miR-181d-5p(1)	0.65	NA	NA	NA	NA	0	0.65
DUSP10	mmu-miR-181c-5p(1)//mmu-miR-181d-5p(1)	mmu-miR-181c(1)//mmu-miR-181d(1)	mmu-miR-181c-5p(1)//mmu-miR-181d-5p(1)			miR-181c-5p(1)//miR-181d-5p(1)	0.65	NA	NA	NA	NA	0	0.65
EPHA6		mmu-miR-181c(2)//mmu-miR-181d(2)	mmu-miR-181c-5p(1)//mmu-miR-181d-5p(1)	mmu-miR-181c(1)//mmu-miR-181d(1)		miR-181c-5p(1)//miR-181d-5p(1)	0.65	NA	NA	NA	NA	0	0.65
ETF1		mmu-miR-181c(2)//mmu-miR-181d(2)	mmu-miR-181c-5p(1)//mmu-miR-181d-5p(1)	mmu-miR-181c(1)//mmu-miR-181d(1)		miR-181c-5p(1)//miR-181d-5p(1)	0.65	NA	NA	NA	NA	0	0.65
ETNK1	mmu-miR-181c-5p(1)//mmu-miR-181d-5p(1)	mmu-miR-181c(2)//mmu-miR-181d(2)	mmu-miR-181c-5p(1)//mmu-miR-181d-5p(1)			miR-181c-5p(1)//miR-181d-5p(1)	0.65	NA	NA	NA	NA	0	0.65
EVI2A	mmu-miR-181c-5p(1)//mmu-miR-181d-5p(1)	mmu-miR-181c(1)//mmu-miR-181d(1)	mmu-miR-181c-5p(1)//mmu-miR-181d-5p(1)			miR-181c-5p(1)//miR-181d-5p(1)	0.65	NA	NA	NA	NA	0	0.65
FAM126B	mmu-miR-181c-5p(1)//mmu-miR-181d-5p(1)	mmu-miR-181c(1)//mmu-miR-181d(1)	mmu-miR-181c-5p(1)//mmu-miR-181d-5p(1)			miR-181c-5p(1)//miR-181d-5p(1)	0.65	NA	NA	NA	NA	0	0.65
FAM160A1	mmu-miR-181c-5p(1)//mmu-miR-181d-5p(1)	mmu-miR-181c(1)//mmu-miR-181d(2)	mmu-miR-181c-5p(1)//mmu-miR-181d-5p(1)			miR-181c-5p(1)//miR-181d-5p(1)	0.65	NA	NA	NA	NA	0	0.65
FAM171A1	mmu-miR-181c-5p(1)//mmu-miR-181d-5p(1)	mmu-miR-181c(1)//mmu-miR-181d(1)	mmu-miR-181c-5p(1)//mmu-miR-181d-5p(1)			miR-181c-5p(1)//miR-181d-5p(1)	0.65	NA	NA	NA	NA	0	0.65
FMR1	mmu-miR-181c-5p(1)//mmu-miR-181d-5p(1)	mmu-miR-181c(1)//mmu-miR-181d(1)	mmu-miR-181c-5p(1)//mmu-miR-181d-5p(1)			miR-181c-5p(1)//miR-181d-5p(1)	0.65	NA	NA	NA	NA	0	0.65
FNIP2	mmu-miR-181c-5p(1)//mmu-miR-181d-5p(1)	mmu-miR-181c(2)//mmu-miR-181d(2)	mmu-miR-181c-5p(1)//mmu-miR-181d-5p(1)			miR-181c-5p(1)//miR-181d-5p(1)	0.65	NA	NA	NA	NA	0	0.65
GDA		mmu-miR-181c(2)//mmu-miR-181d(3)	mmu-miR-181c-5p(1)//mmu-miR-181d-5p(1)	mmu-miR-181c(1)//mmu-miR-181d(1)		miR-181c-5p(1)//miR-181d-5p(1)	0.65	NA	NA	NA	NA	0	0.65
GPD2	mmu-miR-181c-5p(1)//mmu-miR-181d-5p(1)	mmu-miR-181c(1)//mmu-miR-181d(1)	mmu-miR-181c-5p(1)//mmu-miR-181d-5p(1)			miR-181c-5p(1)//miR-181d-5p(1)	0.65	NA	NA	NA	NA	0	0.65
GRID1	mmu-miR-181c-5p(1)//mmu-miR-181d-5p(1)	mmu-miR-181c(1)//mmu-miR-181d(1)	mmu-miR-181c-5p(1)//mmu-miR-181d-5p(1)			miR-181c-5p(1)//miR-181d-5p(1)	0.65	NA	NA	NA	NA	0	0.65
GRIK2	mmu-miR-181c-5p(1)//mmu-miR-181d-5p(1)		mmu-miR-181c-5p(1)//mmu-miR-181d-5p(1)	mmu-miR-181c(1)//mmu-miR-181d(1)		miR-181c-5p(1)//miR-181d-5p(1)	0.65	NA	NA	NA	NA	0	0.65
GRIK3	mmu-miR-181c-5p(1)//mmu-miR-181d-5p(1)		mmu-miR-181c-5p(1)//mmu-miR-181d-5p(1)	mmu-miR-181c(1)//mmu-miR-181d(1)		miR-181c-5p(1)//miR-181d-5p(1)	0.65	NA	NA	NA	NA	0	0.65
GRK6		mmu-miR-181c(2)//mmu-miR-181d(2)	mmu-miR-181c-5p(1)//mmu-miR-181d-5p(1)	mmu-miR-181c(1)//mmu-miR-181d(1)		miR-181c-5p(1)//miR-181d-5p(1)	0.65	NA	NA	NA	NA	0	0.65
GRM7	mmu-miR-181c-5p(1)//mmu-miR-181d-5p(1)	mmu-miR-181c(1)//mmu-miR-181d(1)	mmu-miR-181c-5p(1)//mmu-miR-181d-5p(1)			miR-181c-5p(1)//miR-181d-5p(1)	0.65	NA	NA	NA	NA	0	0.65
HEATR5A		mmu-miR-181c(3)//mmu-miR-181d(3)	mmu-miR-181c-5p(1)//mmu-miR-181d-5p(1)	mmu-miR-181c(1)//mmu-miR-181d(1)		miR-181c-5p(1)//miR-181d-5p(1)	0.65	NA	NA	NA	NA	0	0.65
HOXB4	mmu-miR-181c-5p(1)//mmu-miR-181d-5p(1)	mmu-miR-181c(1)//mmu-miR-181d(1)	mmu-miR-181c-5p(1)//mmu-miR-181d-5p(1)			miR-181c-5p(1)//miR-181d-5p(1)	0.65	NA	NA	NA	NA	0	0.65
HYOU1	mmu-miR-181c-5p(1)//mmu-miR-181d-5p(1)	mmu-miR-181c(1)//mmu-miR-181d(1)		mmu-miR-181c(1)//mmu-miR-181d(1)		miR-181c-5p(1)//miR-181d-5p(1)	0.65	NA	NA	NA	NA	0	0.65
IGDCC3	mmu-miR-181c-5p(1)//mmu-miR-181d-5p(1)	mmu-miR-181c(1)//mmu-miR-181d(1)	mmu-miR-181c-5p(1)//mmu-miR-181d-5p(1)			miR-181c-5p(1)//miR-181d-5p(1)	0.65	NA	NA	NA	NA	0	0.65
IL21		mmu-miR-181c(2)//mmu-miR-181d(2)	mmu-miR-181c-5p(1)//mmu-miR-181d-5p(1)	mmu-miR-181c(1)//mmu-miR-181d(1)		miR-181c-5p(1)//miR-181d-5p(1)	0.65	NA	NA	NA	NA	0	0.65
ING5	mmu-miR-181c-5p(1)//mmu-miR-181d-5p(1)	mmu-miR-181c(3)//mmu-miR-181d(3)	mmu-miR-181c-5p(1)//mmu-miR-181d-5p(1)			miR-181c-5p(1)//miR-181d-5p(1)	0.65	NA	NA	NA	NA	0	0.65
INO80	mmu-miR-181c-5p(1)//mmu-miR-181d-5p(1)	mmu-miR-181c(1)//mmu-miR-181d(1)	mmu-miR-181c-5p(1)//mmu-miR-181d-5p(1)			miR-181c-5p(1)//miR-181d-5p(1)	0.65	NA	NA	NA	NA	0	0.65
IPPK	mmu-miR-181c-5p(1)//mmu-miR-181d-5p(1)	mmu-miR-181c(3)//mmu-miR-181d(3)	mmu-miR-181c-5p(1)//mmu-miR-181d-5p(1)			miR-181c-5p(1)//miR-181d-5p(1)	0.65	NA	NA	NA	NA	0	0.65
IQSEC2	mmu-miR-181c-5p(1)//mmu-miR-181d-5p(1)	mmu-miR-181c(2)//mmu-miR-181d(2)	mmu-miR-181c-5p(1)//mmu-miR-181d-5p(1)			miR-181c-5p(1)//miR-181d-5p(1)	0.65	NA	NA	NA	NA	0	0.65
JDP2	mmu-miR-181c-5p(1)//mmu-miR-181d-5p(1)	mmu-miR-181c(1)//mmu-miR-181d(1)	mmu-miR-181c-5p(1)//mmu-miR-181d-5p(1)			miR-181c-5p(1)//miR-181d-5p(1)	0.65	NA	NA	NA	NA	0	0.65
KANK2		mmu-miR-181c(1)//mmu-miR-181d(1)	mmu-miR-181c-5p(1)//mmu-miR-181d-5p(1)	mmu-miR-181c(1)//mmu-miR-181d(1)		miR-181c-5p(1)//miR-181d-5p(1)	0.65	NA	NA	NA	NA	0	0.65
KAT2B	mmu-miR-181c-5p(1)//mmu-miR-181d-5p(1)	mmu-miR-181c(1)//mmu-miR-181d(1)	mmu-miR-181c-5p(1)//mmu-miR-181d-5p(1)			miR-181c-5p(1)//miR-181d-5p(1)	0.65	NA	NA	NA	NA	0	0.65
KBTBD8		mmu-miR-181c(1)//mmu-miR-181d(1)	mmu-miR-181c-5p(1)//mmu-miR-181d-5p(1)	mmu-miR-181c(1)//mmu-miR-181d(1)		miR-181c-5p(1)//miR-181d-5p(1)	0.65	NA	NA	NA	NA	0	0.65
KCNH7	mmu-miR-181c-5p(1)//mmu-miR-181d-5p(1)	mmu-miR-181c(1)//mmu-miR-181d(2)	mmu-miR-181c-5p(1)//mmu-miR-181d-5p(1)			miR-181c-5p(1)//miR-181d-5p(1)	0.65	NA	NA	NA	NA	0	0.65
KCNK10	mmu-miR-181c-5p(1)//mmu-miR-181d-5p(1)	mmu-miR-181c(1)//mmu-miR-181d(1)	mmu-miR-181c-5p(1)//mmu-miR-181d-5p(1)			miR-181c-5p(1)//miR-181d-5p(1)	0.65	NA	NA	NA	NA	0	0.65
KLHL29	mmu-miR-181c-5p(1)//mmu-miR-181d-5p(1)	mmu-miR-181c(1)//mmu-miR-181d(1)	mmu-miR-181c-5p(1)//mmu-miR-181d-5p(1)			miR-181c-5p(1)//miR-181d-5p(1)	0.65	NA	NA	NA	NA	0	0.65
LCORL		mmu-miR-181c(1)//mmu-miR-181d(1)	mmu-miR-181c-5p(1)//mmu-miR-181d-5p(1)	mmu-miR-181c(1)//mmu-miR-181d(1)		miR-181c-5p(1)//miR-181d-5p(1)	0.65	NA	NA	NA	NA	0	0.65
LIMCH1		mmu-miR-181c(1)//mmu-miR-181d(1)	mmu-miR-181c-5p(1)//mmu-miR-181d-5p(1)	mmu-miR-181c(1)//mmu-miR-181d(1)		miR-181c-5p(1)//miR-181d-5p(1)	0.65	NA	NA	NA	NA	0	0.65
LIN28A	mmu-miR-181c-5p(2)//mmu-miR-181d-5p(2)	mmu-miR-181c(1)//mmu-miR-181d(1)	mmu-miR-181c-5p(1)//mmu-miR-181d-5p(1)			miR-181c-5p(1)//miR-181d-5p(1)	0.65	NA	NA	NA	NA	0	0.65
LPP	mmu-miR-181c-5p(1)//mmu-miR-181d-5p(1)	mmu-miR-181c(1)//mmu-miR-181d(1)	mmu-miR-181c-5p(1)//mmu-miR-181d-5p(1)			miR-181c-5p(1)//miR-181d-5p(1)	0.65	NA	NA	NA	NA	0	0.65
LSM14A	mmu-miR-181c-5p(1)//mmu-miR-181d-5p(1)	mmu-miR-181c(1)//mmu-miR-181d(1)	mmu-miR-181c-5p(1)//mmu-miR-181d-5p(1)			miR-181c-5p(1)//miR-181d-5p(1)	0.65	NA	NA	NA	NA	0	0.65
MAPRE2	mmu-miR-181c-5p(1)//mmu-miR-181d-5p(1)	mmu-miR-181c(1)//mmu-miR-181d(1)	mmu-miR-181c-5p(1)//mmu-miR-181d-5p(1)			miR-181c-5p(1)//miR-181d-5p(1)	0.65	NA	NA	NA	NA	0	0.65
MAST4	mmu-miR-181c-5p(1)//mmu-miR-181d-5p(1)	mmu-miR-181c(3)//mmu-miR-181d(3)	mmu-miR-181c-5p(1)//mmu-miR-181d-5p(1)			miR-181c-5p(1)//miR-181d-5p(1)	0.65	NA	NA	NA	NA	0	0.65
MBLAC2	mmu-miR-181c-5p(1)//mmu-miR-181d-5p(1)	mmu-miR-181c(1)//mmu-miR-181d(2)	mmu-miR-181c-5p(1)//mmu-miR-181d-5p(1)			miR-181c-5p(1)//miR-181d-5p(1)	0.65	NA	NA	NA	NA	0	0.65
MEAF6	mmu-miR-181c-5p(1)//mmu-miR-181d-5p(1)	mmu-miR-181c(2)//mmu-miR-181d(2)	mmu-miR-181c-5p(1)//mmu-miR-181d-5p(1)			miR-181c-5p(1)//miR-181d-5p(1)	0.65	NA	NA	NA	NA	0	0.65
MECP2	mmu-miR-181c-5p(1)//mmu-miR-181d-5p(1)		mmu-miR-181c-5p(1)//mmu-miR-181d-5p(1)	mmu-miR-181c(1)//mmu-miR-181d(1)		miR-181c-5p(1)//miR-181d-5p(1)	0.65	NA	NA	NA	NA	0	0.65
MED12L	mmu-miR-181c-5p(1)//mmu-miR-181d-5p(1)	mmu-miR-181c(1)//mmu-miR-181d(3)	mmu-miR-181c-5p(1)//mmu-miR-181d-5p(1)			miR-181c-5p(1)//miR-181d-5p(1)	0.65	NA	NA	NA	NA	0	0.65
MEGF9	mmu-miR-181c-5p(1)//mmu-miR-181d-5p(1)	mmu-miR-181c(1)//mmu-miR-181d(1)	mmu-miR-181c-5p(1)//mmu-miR-181d-5p(1)			miR-181c-5p(1)//miR-181d-5p(1)	0.65	NA	NA	NA	NA	0	0.65
MET	mmu-miR-181c-5p(1)//mmu-miR-181d-5p(1)	mmu-miR-181c(1)//mmu-miR-181d(2)	mmu-miR-181c-5p(1)//mmu-miR-181d-5p(1)			miR-181c-5p(1)//miR-181d-5p(1)	0.65	NA	NA	NA	NA	0	0.65
MEX3B	mmu-miR-181c-5p(1)//mmu-miR-181d-5p(1)	mmu-miR-181c(1)//mmu-miR-181d(1)	mmu-miR-181c-5p(1)//mmu-miR-181d-5p(1)			miR-181c-5p(1)//miR-181d-5p(1)	0.65	NA	NA	NA	NA	0	0.65
MGAT3	mmu-miR-181c-5p(1)//mmu-miR-181d-5p(1)	mmu-miR-181c(1)//mmu-miR-181d(1)	mmu-miR-181c-5p(1)//mmu-miR-181d-5p(1)			miR-181c-5p(1)//miR-181d-5p(1)	0.65	NA	NA	NA	NA	0	0.65
MLF1	mmu-miR-181c-5p(1)//mmu-miR-181d-5p(1)	mmu-miR-181c(1)//mmu-miR-181d(1)	mmu-miR-181c-5p(1)//mmu-miR-181d-5p(1)			miR-181c-5p(1)//miR-181d-5p(1)	0.65	NA	NA	NA	NA	0	0.65
MLLT10		mmu-miR-181c(1)//mmu-miR-181d(3)	mmu-miR-181c-5p(1)//mmu-miR-181d-5p(1)	mmu-miR-181c(1)//mmu-miR-181d(1)		miR-181c-5p(1)//miR-181d-5p(1)	0.65	NA	NA	NA	NA	0	0.65
MLLT3		mmu-miR-181c(2)//mmu-miR-181d(3)	mmu-miR-181c-5p(1)//mmu-miR-181d-5p(1)	mmu-miR-181c(1)//mmu-miR-181d(1)		miR-181c-5p(1)//miR-181d-5p(1)	0.65	NA	NA	NA	NA	0	0.65
MYCBP	mmu-miR-181c-5p(1)//mmu-miR-181d-5p(1)	mmu-miR-181c(1)//mmu-miR-181d(1)	mmu-miR-181c-5p(1)//mmu-miR-181d-5p(1)			miR-181c-5p(1)//miR-181d-5p(1)	0.65	NA	NA	NA	NA	0	0.65
NBEA	mmu-miR-181c-5p(1)//mmu-miR-181d-5p(1)	mmu-miR-181c(1)//mmu-miR-181d(1)	mmu-miR-181c-5p(1)//mmu-miR-181d-5p(1)			miR-181c-5p(1)//miR-181d-5p(1)	0.65	NA	NA	NA	NA	0	0.65
NDRG2	mmu-miR-181c-5p(1)//mmu-miR-181d-5p(1)	mmu-miR-181c(1)//mmu-miR-181d(1)	mmu-miR-181c-5p(1)//mmu-miR-181d-5p(1)			miR-181c-5p(1)//miR-181d-5p(1)	0.65	NA	NA	NA	NA	0	0.65
NFATC2IP	mmu-miR-181c-5p(1)//mmu-miR-181d-5p(1)	mmu-miR-181c(1)//mmu-miR-181d(1)	mmu-miR-181c-5p(1)//mmu-miR-181d-5p(1)			miR-181c-5p(1)//miR-181d-5p(1)	0.65	NA	NA	NA	NA	0	0.65
NIPAL4	mmu-miR-181c-5p(2)//mmu-miR-181d-5p(2)	mmu-miR-181c(2)//mmu-miR-181d(2)	mmu-miR-181c-5p(1)//mmu-miR-181d-5p(1)			miR-181c-5p(1)//miR-181d-5p(1)	0.65	NA	NA	NA	NA	0	0.65
NMT1	mmu-miR-181c-5p(1)//mmu-miR-181d-5p(1)	mmu-miR-181c(1)//mmu-miR-181d(1)	mmu-miR-181c-5p(1)//mmu-miR-181d-5p(1)			miR-181c-5p(1)//miR-181d-5p(1)	0.65	NA	NA	NA	NA	0	0.65
NNT	mmu-miR-181c-5p(1)//mmu-miR-181d-5p(1)	mmu-miR-181c(6)//mmu-miR-181d(6)	mmu-miR-181c-5p(1)//mmu-miR-181d-5p(1)			miR-181c-5p(1)//miR-181d-5p(1)	0.65	NA	NA	NA	NA	0	0.65
NOL8	mmu-miR-181c-5p(1)//mmu-miR-181d-5p(1)	mmu-miR-181c(1)//mmu-miR-181d(1)	mmu-miR-181c-5p(1)//mmu-miR-181d-5p(1)			miR-181c-5p(1)//miR-181d-5p(1)	0.65	NA	NA	NA	NA	0	0.65
NOVA1	mmu-miR-181c-5p(2)//mmu-miR-181d-5p(2)	mmu-miR-181c(3)//mmu-miR-181d(3)	mmu-miR-181c-5p(1)//mmu-miR-181d-5p(1)			miR-181c-5p(1)//miR-181d-5p(1)	0.65	NA	NA	NA	NA	0	0.65
NPTXR	mmu-miR-181c-5p(2)//mmu-miR-181d-5p(2)	mmu-miR-181c(2)//mmu-miR-181d(2)	mmu-miR-181c-5p(1)//mmu-miR-181d-5p(1)			miR-181c-5p(1)//miR-181d-5p(1)	0.65	NA	NA	NA	NA	0	0.65
OLFM1		mmu-miR-181c(1)//mmu-miR-181d(1)	mmu-miR-181c-5p(1)//mmu-miR-181d-5p(1)	mmu-miR-181c(1)//mmu-miR-181d(1)		miR-181c-5p(1)//miR-181d-5p(1)	0.65	NA	NA	NA	NA	0	0.65
PAFAH1B1	mmu-miR-181c-5p(1)//mmu-miR-181d-5p(1)	mmu-miR-181c(2)//mmu-miR-181d(4)	mmu-miR-181c-5p(1)//mmu-miR-181d-5p(1)			miR-181c-5p(1)//miR-181d-5p(1)	0.65	NA	NA	NA	NA	0	0.65
PATL1		mmu-miR-181c(1)//mmu-miR-181d(1)	mmu-miR-181c-5p(1)//mmu-miR-181d-5p(1)	mmu-miR-181c(1)//mmu-miR-181d(1)		miR-181c-5p(1)//miR-181d-5p(1)	0.65	NA	NA	NA	NA	0	0.65
PCDH10		mmu-miR-181c(1)//mmu-miR-181d(1)	mmu-miR-181c-5p(1)//mmu-miR-181d-5p(1)	mmu-miR-181c(1)//mmu-miR-181d(1)		miR-181c-5p(1)//miR-181d-5p(1)	0.65	NA	NA	NA	NA	0	0.65
PCDH18		mmu-miR-181c(1)//mmu-miR-181d(1)	mmu-miR-181c-5p(1)//mmu-miR-181d-5p(1)	mmu-miR-181c(1)//mmu-miR-181d(1)		miR-181c-5p(1)//miR-181d-5p(1)	0.65	NA	NA	NA	NA	0	0.65
PCDHAC1		mmu-miR-181c(2)//mmu-miR-181d(3)	mmu-miR-181c-5p(1)//mmu-miR-181d-5p(1)	mmu-miR-181c(2)//mmu-miR-181d(2)		miR-181c-5p(1)//miR-181d-5p(1)	0.65	NA	NA	NA	NA	0	0.65
PCMTD1		mmu-miR-181c(1)//mmu-miR-181d(1)	mmu-miR-181c-5p(1)//mmu-miR-181d-5p(1)	mmu-miR-181c(1)//mmu-miR-181d(1)		miR-181c-5p(1)//miR-181d-5p(1)	0.65	NA	NA	NA	NA	0	0.65
PCNP		mmu-miR-181c(3)//mmu-miR-181d(3)	mmu-miR-181c-5p(1)//mmu-miR-181d-5p(1)	mmu-miR-181c(2)//mmu-miR-181d(2)		miR-181c-5p(1)//miR-181d-5p(1)	0.65	NA	NA	NA	NA	0	0.65
PHF3		mmu-miR-181c(1)//mmu-miR-181d(1)	mmu-miR-181c-5p(1)//mmu-miR-181d-5p(1)	mmu-miR-181c(1)//mmu-miR-181d(1)		miR-181c-5p(1)//miR-181d-5p(1)	0.65	NA	NA	NA	NA	0	0.65
PI4K2A	mmu-miR-181c-5p(1)//mmu-miR-181d-5p(1)		mmu-miR-181c-5p(1)//mmu-miR-181d-5p(1)	mmu-miR-181c(1)//mmu-miR-181d(1)		miR-181c-5p(1)//miR-181d-5p(1)	0.65	NA	NA	NA	NA	0	0.65
PKIA		mmu-miR-181c(1)//mmu-miR-181d(1)	mmu-miR-181c-5p(1)//mmu-miR-181d-5p(1)	mmu-miR-181c(1)//mmu-miR-181d(1)	miR-181c-5p(1)//miR-181d-5p(1)		0.65	NA	NA	NA	NA	0	0.65
PLAU	mmu-miR-181c-5p(1)//mmu-miR-181d-5p(1)	mmu-miR-181c(1)//mmu-miR-181d(1)	mmu-miR-181c-5p(1)//mmu-miR-181d-5p(1)			miR-181c-5p(1)//miR-181d-5p(1)	0.65	NA	NA	NA	NA	0	0.65
PLXDC2	mmu-miR-181c-5p(1)//mmu-miR-181d-5p(1)	mmu-miR-181c(1)//mmu-miR-181d(1)	mmu-miR-181c-5p(1)//mmu-miR-181d-5p(1)			miR-181c-5p(1)//miR-181d-5p(1)	0.65	NA	NA	NA	NA	0	0.65
PPFIA1	mmu-miR-181c-5p(1)//mmu-miR-181d-5p(1)	mmu-miR-181c(2)//mmu-miR-181d(2)	mmu-miR-181c-5p(1)//mmu-miR-181d-5p(1)			miR-181c-5p(1)//miR-181d-5p(1)	0.65	NA	NA	NA	NA	0	0.65
PPP1R12B	mmu-miR-181c-5p(1)//mmu-miR-181d-5p(1)	mmu-miR-181c(1)//mmu-miR-181d(1)	mmu-miR-181c-5p(1)//mmu-miR-181d-5p(1)			miR-181c-5p(1)//miR-181d-5p(1)	0.65	NA	NA	NA	NA	0	0.65
PRKAA1	mmu-miR-181c-5p(1)//mmu-miR-181d-5p(1)	mmu-miR-181c(1)//mmu-miR-181d(3)	mmu-miR-181c-5p(1)//mmu-miR-181d-5p(1)			miR-181c-5p(1)//miR-181d-5p(1)	0.65	NA	NA	NA	NA	0	0.65
PTGS1	mmu-miR-181c-5p(1)//mmu-miR-181d-5p(1)	mmu-miR-181c(2)//mmu-miR-181d(2)	mmu-miR-181c-5p(1)//mmu-miR-181d-5p(1)			miR-181c-5p(1)//miR-181d-5p(1)	0.65	NA	NA	NA	NA	0	0.65
QK	mmu-miR-181c-5p(1)//mmu-miR-181d-5p(1)	mmu-miR-181c(2)//mmu-miR-181d(2)	mmu-miR-181c-5p(1)//mmu-miR-181d-5p(1)			miR-181c-5p(1)//miR-181d-5p(1)	0.65	NA	NA	NA	NA	0	0.65
RAB11A		mmu-miR-181c(3)//mmu-miR-181d(2)	mmu-miR-181c-5p(1)//mmu-miR-181d-5p(1)	mmu-miR-181c(1)//mmu-miR-181d(1)		miR-181c-5p(1)//miR-181d-5p(1)	0.65	NA	NA	NA	NA	0	0.65
RAB11FIP2	mmu-miR-181c-5p(1)//mmu-miR-181d-5p(1)	mmu-miR-181c(2)//mmu-miR-181d(2)	mmu-miR-181c-5p(1)//mmu-miR-181d-5p(1)			miR-181c-5p(1)//miR-181d-5p(1)	0.65	NA	NA	NA	NA	0	0.65
RASSF10	mmu-miR-181c-5p(1)//mmu-miR-181d-5p(1)	mmu-miR-181c(1)//mmu-miR-181d(1)		mmu-miR-181c(1)//mmu-miR-181d(1)		miR-181c-5p(1)//miR-181d-5p(1)	0.65	NA	NA	NA	NA	0	0.65
RBM22		mmu-miR-181c(1)//mmu-miR-181d(1)	mmu-miR-181c-5p(1)//mmu-miR-181d-5p(1)	mmu-miR-181c(1)//mmu-miR-181d(1)		miR-181c-5p(1)//miR-181d-5p(1)	0.65	NA	NA	NA	NA	0	0.65
RCBTB2	mmu-miR-181c-5p(1)//mmu-miR-181d-5p(1)	mmu-miR-181c(5)//mmu-miR-181d(6)	mmu-miR-181c-5p(1)//mmu-miR-181d-5p(1)			miR-181c-5p(1)//miR-181d-5p(1)	0.65	NA	NA	NA	NA	0	0.65
RFK		mmu-miR-181c(1)//mmu-miR-181d(1)	mmu-miR-181c-5p(1)//mmu-miR-181d-5p(1)	mmu-miR-181c(1)//mmu-miR-181d(1)		miR-181c-5p(1)//miR-181d-5p(1)	0.65	NA	NA	NA	NA	0	0.65
RGMA	mmu-miR-181c-5p(1)//mmu-miR-181d-5p(1)	mmu-miR-181c(1)//mmu-miR-181d(1)	mmu-miR-181c-5p(1)//mmu-miR-181d-5p(1)			miR-181c-5p(1)//miR-181d-5p(1)	0.65	NA	NA	NA	NA	0	0.65
RLIM	mmu-miR-181c-5p(2)//mmu-miR-181d-5p(2)	mmu-miR-181c(1)//mmu-miR-181d(1)	mmu-miR-181c-5p(1)//mmu-miR-181d-5p(1)			miR-181c-5p(1)//miR-181d-5p(1)	0.65	NA	NA	NA	NA	0	0.65
RPRD1B	mmu-miR-181c-5p(1)//mmu-miR-181d-5p(1)	mmu-miR-181c(2)//mmu-miR-181d(2)	mmu-miR-181c-5p(1)//mmu-miR-181d-5p(1)			miR-181c-5p(1)//miR-181d-5p(1)	0.65	NA	NA	NA	NA	0	0.65
RPS6KB1	mmu-miR-181c-5p(2)//mmu-miR-181d-5p(2)		mmu-miR-181c-5p(1)//mmu-miR-181d-5p(1)	mmu-miR-181c(2)//mmu-miR-181d(2)		miR-181c-5p(1)//miR-181d-5p(1)	0.65	NA	NA	NA	NA	0	0.65
SACM1L	mmu-miR-181c-5p(1)//mmu-miR-181d-5p(1)	mmu-miR-181c(1)//mmu-miR-181d(1)	mmu-miR-181c-5p(1)//mmu-miR-181d-5p(1)			miR-181c-5p(1)//miR-181d-5p(1)	0.65	NA	NA	NA	NA	0	0.65
SEC11A		mmu-miR-181c(2)//mmu-miR-181d(2)	mmu-miR-181c-5p(1)//mmu-miR-181d-5p(1)	mmu-miR-181c(1)//mmu-miR-181d(1)		miR-181c-5p(1)//miR-181d-5p(1)	0.65	NA	NA	NA	NA	0	0.65
SECISBP2	mmu-miR-181c-5p(1)//mmu-miR-181d-5p(1)	mmu-miR-181c(1)//mmu-miR-181d(3)	mmu-miR-181c-5p(1)//mmu-miR-181d-5p(1)			miR-181c-5p(1)//miR-181d-5p(1)	0.65	NA	NA	NA	NA	0	0.65
SEMA4C		mmu-miR-181c(1)//mmu-miR-181d(1)	mmu-miR-181c-5p(1)//mmu-miR-181d-5p(1)	mmu-miR-181c(1)//mmu-miR-181d(1)		miR-181c-5p(1)//miR-181d-5p(1)	0.65	NA	NA	NA	NA	0	0.65
SEPT11	mmu-miR-181c-5p(1)//mmu-miR-181d-5p(1)		mmu-miR-181c-5p(1)//mmu-miR-181d-5p(1)	mmu-miR-181c(1)//mmu-miR-181d(1)		miR-181c-5p(1)//miR-181d-5p(1)	0.65	NA	NA	NA	NA	0	0.65
SERTAD4	mmu-miR-181c-5p(1)//mmu-miR-181d-5p(1)	mmu-miR-181c(1)//mmu-miR-181d(1)	mmu-miR-181c-5p(1)//mmu-miR-181d-5p(1)			miR-181c-5p(1)//miR-181d-5p(1)	0.65	NA	NA	NA	NA	0	0.65
SIPA1L2	mmu-miR-181c-5p(1)//mmu-miR-181d-5p(1)	mmu-miR-181c(1)//mmu-miR-181d(1)	mmu-miR-181c-5p(1)//mmu-miR-181d-5p(1)			miR-181c-5p(1)//miR-181d-5p(1)	0.65	NA	NA	NA	NA	0	0.65
SLC30A7		mmu-miR-181c(1)//mmu-miR-181d(1)	mmu-miR-181c-5p(1)//mmu-miR-181d-5p(1)	mmu-miR-181c(1)//mmu-miR-181d(1)		miR-181c-5p(1)//miR-181d-5p(1)	0.65	NA	NA	NA	NA	0	0.65
SMAP1	mmu-miR-181c-5p(1)//mmu-miR-181d-5p(1)	mmu-miR-181c(1)//mmu-miR-181d(1)	mmu-miR-181c-5p(1)//mmu-miR-181d-5p(1)			miR-181c-5p(1)//miR-181d-5p(1)	0.65	NA	NA	NA	NA	0	0.65
SP1		mmu-miR-181c(1)//mmu-miR-181d(1)	mmu-miR-181c-5p(1)//mmu-miR-181d-5p(1)	mmu-miR-181c(1)//mmu-miR-181d(1)		miR-181c-5p(1)//miR-181d-5p(1)	0.65	NA	NA	NA	NA	0	0.65
SPECC1L	mmu-miR-181c-5p(1)//mmu-miR-181d-5p(1)		mmu-miR-181c-5p(1)//mmu-miR-181d-5p(1)	mmu-miR-181c(1)//mmu-miR-181d(1)		miR-181c-5p(1)//miR-181d-5p(1)	0.65	NA	NA	NA	NA	0	0.65
SPSB4		mmu-miR-181c(1)//mmu-miR-181d(1)	mmu-miR-181c-5p(1)//mmu-miR-181d-5p(1)	mmu-miR-181c(1)//mmu-miR-181d(1)		miR-181c-5p(1)//miR-181d-5p(1)	0.65	NA	NA	NA	NA	0	0.65
ST8SIA3	mmu-miR-181c-5p(1)//mmu-miR-181d-5p(1)	mmu-miR-181c(2)//mmu-miR-181d(3)	mmu-miR-181c-5p(1)//mmu-miR-181d-5p(1)			miR-181c-5p(1)//miR-181d-5p(1)	0.65	NA	NA	NA	NA	0	0.65
STAG1		mmu-miR-181c(2)//mmu-miR-181d(3)	mmu-miR-181c-5p(1)//mmu-miR-181d-5p(1)	mmu-miR-181c(1)//mmu-miR-181d(1)		miR-181c-5p(1)//miR-181d-5p(1)	0.65	NA	NA	NA	NA	0	0.65
STK10	mmu-miR-181c-5p(1)//mmu-miR-181d-5p(1)	mmu-miR-181c(1)//mmu-miR-181d(1)	mmu-miR-181c-5p(1)//mmu-miR-181d-5p(1)			miR-181c-5p(1)//miR-181d-5p(1)	0.65	NA	NA	NA	NA	0	0.65
STXBP5		mmu-miR-181c(1)//mmu-miR-181d(1)	mmu-miR-181c-5p(1)//mmu-miR-181d-5p(1)	mmu-miR-181c(1)//mmu-miR-181d(1)		miR-181c-5p(1)//miR-181d-5p(1)	0.65	NA	NA	NA	NA	0	0.65
STXBP6	mmu-miR-181c-5p(1)//mmu-miR-181d-5p(1)	mmu-miR-181c(2)//mmu-miR-181d(2)	mmu-miR-181c-5p(1)//mmu-miR-181d-5p(1)			miR-181c-5p(1)//miR-181d-5p(1)	0.65	NA	NA	NA	NA	0	0.65
SUN1	mmu-miR-181c-5p(1)//mmu-miR-181d-5p(1)	mmu-miR-181c(1)//mmu-miR-181d(1)	mmu-miR-181c-5p(1)//mmu-miR-181d-5p(1)			miR-181c-5p(1)//miR-181d-5p(1)	0.65	NA	NA	NA	NA	0	0.65
TAB2	mmu-miR-181c-5p(1)//mmu-miR-181d-5p(1)	mmu-miR-181c(1)//mmu-miR-181d(1)	mmu-miR-181c-5p(1)//mmu-miR-181d-5p(1)			miR-181c-5p(1)//miR-181d-5p(1)	0.65	NA	NA	NA	NA	0	0.65
TAB3	mmu-miR-181c-5p(2)//mmu-miR-181d-5p(2)	mmu-miR-181c(1)//mmu-miR-181d(1)	mmu-miR-181c-5p(1)//mmu-miR-181d-5p(1)			miR-181c-5p(1)//miR-181d-5p(1)	0.65	NA	NA	NA	NA	0	0.65
TAF13	mmu-miR-181c-5p(1)//mmu-miR-181d-5p(1)	mmu-miR-181c(2)//mmu-miR-181d(2)	mmu-miR-181c-5p(1)//mmu-miR-181d-5p(1)			miR-181c-5p(1)//miR-181d-5p(1)	0.65	NA	NA	NA	NA	0	0.65
TBC1D1	mmu-miR-181c-5p(1)//mmu-miR-181d-5p(1)	mmu-miR-181c(1)//mmu-miR-181d(1)	mmu-miR-181c-5p(1)//mmu-miR-181d-5p(1)			miR-181c-5p(1)//miR-181d-5p(1)	0.65	NA	NA	NA	NA	0	0.65
TBCEL	mmu-miR-181c-5p(1)//mmu-miR-181d-5p(1)	mmu-miR-181c(1)//mmu-miR-181d(1)	mmu-miR-181c-5p(1)//mmu-miR-181d-5p(1)			miR-181c-5p(1)//miR-181d-5p(1)	0.65	NA	NA	NA	NA	0	0.65
THBS4		mmu-miR-181c(1)//mmu-miR-181d(1)	mmu-miR-181c-5p(1)//mmu-miR-181d-5p(1)	mmu-miR-181c(1)//mmu-miR-181d(1)		miR-181c-5p(1)//miR-181d-5p(1)	0.65	NA	NA	NA	NA	0	0.65
THRB	mmu-miR-181c-5p(1)//mmu-miR-181d-5p(1)		mmu-miR-181c-5p(1)//mmu-miR-181d-5p(1)	mmu-miR-181c(2)//mmu-miR-181d(2)		miR-181c-5p(1)//miR-181d-5p(1)	0.65	NA	NA	NA	NA	0	0.65
TIMM17B		mmu-miR-181c(1)//mmu-miR-181d(1)	mmu-miR-181c-5p(1)//mmu-miR-181d-5p(1)	mmu-miR-181c(1)//mmu-miR-181d(1)		miR-181c-5p(1)//miR-181d-5p(1)	0.65	NA	NA	NA	NA	0	0.65
TLE1	mmu-miR-181c-5p(1)//mmu-miR-181d-5p(1)	mmu-miR-181c(4)//mmu-miR-181d(4)	mmu-miR-181c-5p(1)//mmu-miR-181d-5p(1)			miR-181c-5p(1)//miR-181d-5p(1)	0.65	NA	NA	NA	NA	0	0.65
TMEFF1	mmu-miR-181c-5p(1)//mmu-miR-181d-5p(1)	mmu-miR-181c(1)//mmu-miR-181d(1)	mmu-miR-181c-5p(1)//mmu-miR-181d-5p(1)			miR-181c-5p(1)//miR-181d-5p(1)	0.65	NA	NA	NA	NA	0	0.65
TMEM158		mmu-miR-181c(1)//mmu-miR-181d(1)	mmu-miR-181c-5p(1)//mmu-miR-181d-5p(1)	mmu-miR-181c(1)//mmu-miR-181d(1)		miR-181c-5p(1)//miR-181d-5p(1)	0.65	NA	NA	NA	NA	0	0.65
TMEM178		mmu-miR-181c(1)//mmu-miR-181d(1)	mmu-miR-181c-5p(1)//mmu-miR-181d-5p(1)	mmu-miR-181c(1)//mmu-miR-181d(1)		miR-181c-5p(1)//miR-181d-5p(1)	0.65	NA	NA	NA	NA	0	0.65
TNF	mmu-miR-181c-5p(1)//mmu-miR-181d-5p(1)	mmu-miR-181c(1)//mmu-miR-181d(1)	mmu-miR-181c-5p(1)//mmu-miR-181d-5p(1)			miR-181c-5p(1)//miR-181d-5p(1)	0.65	NA	NA	NA	NA	0	0.65
TNFSF11		mmu-miR-181c(1)//mmu-miR-181d(1)	mmu-miR-181c-5p(1)//mmu-miR-181d-5p(1)	mmu-miR-181c(1)//mmu-miR-181d(1)		miR-181c-5p(1)//miR-181d-5p(1)	0.65	NA	NA	NA	NA	0	0.65
TRIM3	mmu-miR-181c-5p(1)//mmu-miR-181d-5p(1)		mmu-miR-181c-5p(1)//mmu-miR-181d-5p(1)	mmu-miR-181c(1)//mmu-miR-181d(1)		miR-181c-5p(1)//miR-181d-5p(1)	0.65	NA	NA	NA	NA	0	0.65
TSPAN13		mmu-miR-181c(1)//mmu-miR-181d(1)	mmu-miR-181c-5p(1)//mmu-miR-181d-5p(1)	mmu-miR-181c(1)//mmu-miR-181d(1)		miR-181c-5p(1)//miR-181d-5p(1)	0.65	NA	NA	NA	NA	0	0.65
TTYH3	mmu-miR-181c-5p(1)//mmu-miR-181d-5p(1)		mmu-miR-181c-5p(1)//mmu-miR-181d-5p(1)	mmu-miR-181c(1)//mmu-miR-181d(1)		miR-181c-5p(1)//miR-181d-5p(1)	0.65	NA	NA	NA	NA	0	0.65
TULP4	mmu-miR-181c-5p(1)//mmu-miR-181d-5p(1)	mmu-miR-181c(1)//mmu-miR-181d(1)	mmu-miR-181c-5p(1)//mmu-miR-181d-5p(1)			miR-181c-5p(1)//miR-181d-5p(1)	0.65	NA	NA	NA	NA	0	0.65
UHRF1BP1L	mmu-miR-181c-5p(1)//mmu-miR-181d-5p(1)	mmu-miR-181c(2)//mmu-miR-181d(1)	mmu-miR-181c-5p(1)//mmu-miR-181d-5p(1)			miR-181c-5p(1)//miR-181d-5p(1)	0.65	NA	NA	NA	NA	0	0.65
UNC80	mmu-miR-181c-5p(1)//mmu-miR-181d-5p(1)	mmu-miR-181c(1)//mmu-miR-181d(1)	mmu-miR-181c-5p(1)//mmu-miR-181d-5p(1)			miR-181c-5p(1)//miR-181d-5p(1)	0.65	NA	NA	NA	NA	0	0.65
USP15	mmu-miR-181c-5p(2)//mmu-miR-181d-5p(2)	mmu-miR-181c(1)//mmu-miR-181d(2)	mmu-miR-181c-5p(1)//mmu-miR-181d-5p(1)			miR-181c-5p(1)//miR-181d-5p(1)	0.65	NA	NA	NA	NA	0	0.65
USP8	mmu-miR-181c-5p(1)//mmu-miR-181d-5p(1)	mmu-miR-181c(1)//mmu-miR-181d(1)	mmu-miR-181c-5p(1)//mmu-miR-181d-5p(1)			miR-181c-5p(1)//miR-181d-5p(1)	0.65	NA	NA	NA	NA	0	0.65
WHAMM	mmu-miR-181c-5p(1)//mmu-miR-181d-5p(1)	mmu-miR-181c(1)//mmu-miR-181d(1)	mmu-miR-181c-5p(1)//mmu-miR-181d-5p(1)			miR-181c-5p(1)//miR-181d-5p(1)	0.65	NA	NA	NA	NA	0	0.65
YTHDC2	mmu-miR-181c-5p(1)//mmu-miR-181d-5p(1)	mmu-miR-181c(4)//mmu-miR-181d(8)	mmu-miR-181c-5p(1)//mmu-miR-181d-5p(1)			miR-181c-5p(1)//miR-181d-5p(1)	0.65	NA	NA	NA	NA	0	0.65
YWHAZ	mmu-miR-181c-5p(1)//mmu-miR-181d-5p(1)	mmu-miR-181c(3)//mmu-miR-181d(3)	mmu-miR-181c-5p(1)//mmu-miR-181d-5p(1)			miR-181c-5p(1)//miR-181d-5p(1)	0.65	NA	NA	NA	NA	0	0.65
ZC3H6		mmu-miR-181c(1)//mmu-miR-181d(1)	mmu-miR-181c-5p(1)//mmu-miR-181d-5p(1)	mmu-miR-181c(1)//mmu-miR-181d(1)		miR-181c-5p(1)//miR-181d-5p(1)	0.65	NA	NA	NA	NA	0	0.65
ZDHHC7	mmu-miR-181c-5p(1)//mmu-miR-181d-5p(1)	mmu-miR-181c(1)//mmu-miR-181d(1)	mmu-miR-181c-5p(1)//mmu-miR-181d-5p(1)			miR-181c-5p(1)//miR-181d-5p(1)	0.65	NA	NA	NA	NA	0	0.65
ZFP280D	mmu-miR-181c-5p(1)//mmu-miR-181d-5p(1)	mmu-miR-181c(6)//mmu-miR-181d(11)	mmu-miR-181c-5p(1)//mmu-miR-181d-5p(1)			miR-181c-5p(1)//miR-181d-5p(1)	0.65	NA	NA	NA	NA	0	0.65
ZFP458		mmu-miR-181c(1)//mmu-miR-181d(1)	mmu-miR-181c-5p(1)//mmu-miR-181d-5p(1)	mmu-miR-181c(1)//mmu-miR-181d(1)		miR-181c-5p(1)//miR-181d-5p(1)	0.65	NA	NA	NA	NA	0	0.65
ZFP568	mmu-miR-181c-5p(1)//mmu-miR-181d-5p(1)	mmu-miR-181c(1)//mmu-miR-181d(2)	mmu-miR-181c-5p(1)//mmu-miR-181d-5p(1)			miR-181c-5p(1)//miR-181d-5p(1)	0.65	NA	NA	NA	NA	0	0.65
ZFP619	mmu-miR-181c-5p(1)//mmu-miR-181d-5p(1)	mmu-miR-181c(3)//mmu-miR-181d(3)	mmu-miR-181c-5p(1)//mmu-miR-181d-5p(1)			miR-181c-5p(1)//miR-181d-5p(1)	0.65	NA	NA	NA	NA	0	0.65
ZFP664	mmu-miR-181c-5p(1)//mmu-miR-181d-5p(1)	mmu-miR-181c(1)//mmu-miR-181d(1)	mmu-miR-181c-5p(1)//mmu-miR-181d-5p(1)			miR-181c-5p(1)//miR-181d-5p(1)	0.65	NA	NA	NA	NA	0	0.65
ZFP697	mmu-miR-181c-5p(1)//mmu-miR-181d-5p(1)	mmu-miR-181c(2)//mmu-miR-181d(3)	mmu-miR-181c-5p(1)//mmu-miR-181d-5p(1)			miR-181c-5p(1)//miR-181d-5p(1)	0.65	NA	NA	NA	NA	0	0.65
ZFP704	mmu-miR-181c-5p(2)//mmu-miR-181d-5p(2)		mmu-miR-181c-5p(1)//mmu-miR-181d-5p(1)	mmu-miR-181c(3)//mmu-miR-181d(3)		miR-181c-5p(1)//miR-181d-5p(1)	0.65	NA	NA	NA	NA	0	0.65
ZFP82	mmu-miR-181c-5p(1)//mmu-miR-181d-5p(1)	mmu-miR-181c(1)//mmu-miR-181d(1)	mmu-miR-181c-5p(1)//mmu-miR-181d-5p(1)			miR-181c-5p(1)//miR-181d-5p(1)	0.65	NA	NA	NA	NA	0	0.65
ZFP97	mmu-miR-181c-5p(3)//mmu-miR-181d-5p(3)	mmu-miR-181c(2)//mmu-miR-181d(2)	mmu-miR-181c-5p(1)//mmu-miR-181d-5p(1)			miR-181c-5p(1)//miR-181d-5p(1)	0.65	NA	NA	NA	NA	0	0.65
ZSWIM1	mmu-miR-181c-5p(1)//mmu-miR-181d-5p(1)	mmu-miR-181c(1)//mmu-miR-181d(1)	mmu-miR-181c-5p(1)//mmu-miR-181d-5p(1)			miR-181c-5p(1)//miR-181d-5p(1)	0.65	NA	NA	NA	NA	0	0.65
CNOT1		mmu-miR-181d(1)	mmu-miR-181c-5p(1)//mmu-miR-181d-5p(1)		miR-181c-5p(1)//miR-181d-5p(1)	miR-181c-5p(1)//miR-181d-5p(1)	0.625	NA	NA	NA	NA	0	0.625
DDX3Y		mmu-miR-181c(2)//mmu-miR-181d(2)	mmu-miR-181d-5p(1)		miR-181c-5p(1)//miR-181d-5p(1)	miR-181c-5p(1)//miR-181d-5p(1)	0.625	NA	NA	NA	NA	0	0.625
EEA1		mmu-miR-181d(1)	mmu-miR-181c-5p(1)//mmu-miR-181d-5p(1)		miR-181c-5p(1)//miR-181d-5p(1)	miR-181c-5p(1)//miR-181d-5p(1)	0.625	NA	NA	NA	NA	0	0.625
ELOVL5		mmu-miR-181c(1)	mmu-miR-181c-5p(1)//mmu-miR-181d-5p(1)		miR-181c-5p(1)//miR-181d-5p(1)	miR-181c-5p(1)//miR-181d-5p(1)	0.625	NA	NA	NA	NA	0	0.625
ERLIN1		mmu-miR-181d(1)	mmu-miR-181c-5p(1)//mmu-miR-181d-5p(1)		miR-181c-5p(1)//miR-181d-5p(1)	miR-181c-5p(1)//miR-181d-5p(1)	0.625	NA	NA	NA	NA	0	0.625
FNBP4		mmu-miR-181d(1)	mmu-miR-181c-5p(1)//mmu-miR-181d-5p(1)		miR-181c-5p(1)//miR-181d-5p(1)	miR-181c-5p(1)//miR-181d-5p(1)	0.625	NA	NA	NA	NA	0	0.625
GLCCI1	mmu-miR-181c-5p(1)//mmu-miR-181d-5p(1)		mmu-miR-181c-5p(1)		miR-181c-5p(1)//miR-181d-5p(1)	miR-181c-5p(1)//miR-181d-5p(1)	0.625	NA	NA	NA	NA	0	0.625
HELLS		mmu-miR-181d(1)	mmu-miR-181c-5p(1)//mmu-miR-181d-5p(1)		miR-181c-5p(1)//miR-181d-5p(1)	miR-181c-5p(1)//miR-181d-5p(1)	0.625	NA	NA	NA	NA	0	0.625
KLHL15		mmu-miR-181d(2)	mmu-miR-181c-5p(1)//mmu-miR-181d-5p(1)		miR-181c-5p(1)//miR-181d-5p(1)	miR-181c-5p(1)//miR-181d-5p(1)	0.625	NA	NA	NA	NA	0	0.625
LIMS1		mmu-miR-181c(2)	mmu-miR-181c-5p(1)//mmu-miR-181d-5p(1)		miR-181c-5p(1)//miR-181d-5p(1)	miR-181c-5p(1)//miR-181d-5p(1)	0.625	NA	NA	NA	NA	0	0.625
NCOR1		mmu-miR-181c(1)	mmu-miR-181c-5p(1)//mmu-miR-181d-5p(1)		miR-181c-5p(1)//miR-181d-5p(1)	miR-181c-5p(1)//miR-181d-5p(1)	0.625	NA	NA	NA	NA	0	0.625
NF1		mmu-miR-181c(1)//mmu-miR-181d(1)	mmu-miR-181d-5p(1)		miR-181c-5p(1)//miR-181d-5p(1)	miR-181c-5p(1)//miR-181d-5p(1)	0.625	NA	NA	NA	NA	0	0.625
NIN		mmu-miR-181c(1)//mmu-miR-181d(1)	mmu-miR-181d-5p(1)		miR-181c-5p(1)//miR-181d-5p(1)	miR-181c-5p(1)//miR-181d-5p(1)	0.625	NA	NA	NA	NA	0	0.625
RAB5A		mmu-miR-181d(1)	mmu-miR-181c-5p(1)//mmu-miR-181d-5p(1)		miR-181c-5p(1)//miR-181d-5p(1)	miR-181c-5p(1)//miR-181d-5p(1)	0.625	NA	NA	NA	NA	0	0.625
RAP1GDS1		mmu-miR-181d(2)	mmu-miR-181c-5p(1)//mmu-miR-181d-5p(1)		miR-181c-5p(1)//miR-181d-5p(1)	miR-181c-5p(1)//miR-181d-5p(1)	0.625	NA	NA	NA	NA	0	0.625
RASL10B		mmu-miR-181d(2)	mmu-miR-181c-5p(1)//mmu-miR-181d-5p(1)		miR-181c-5p(1)//miR-181d-5p(1)	miR-181c-5p(1)//miR-181d-5p(1)	0.625	NA	NA	NA	NA	0	0.625
RBPJ		mmu-miR-181d(1)	mmu-miR-181c-5p(1)//mmu-miR-181d-5p(1)		miR-181c-5p(1)//miR-181d-5p(1)	miR-181c-5p(1)//miR-181d-5p(1)	0.625	NA	NA	NA	NA	0	0.625
SACS		mmu-miR-181d(1)	mmu-miR-181c-5p(1)//mmu-miR-181d-5p(1)		miR-181c-5p(1)//miR-181d-5p(1)	miR-181c-5p(1)//miR-181d-5p(1)	0.625	NA	NA	NA	NA	0	0.625
SH3GLB1		mmu-miR-181d(1)	mmu-miR-181c-5p(1)//mmu-miR-181d-5p(1)		miR-181c-5p(1)//miR-181d-5p(1)	miR-181c-5p(1)//miR-181d-5p(1)	0.625	NA	NA	NA	NA	0	0.625
SLC20A1		mmu-miR-181c(1)//mmu-miR-181d(1)	mmu-miR-181d-5p(1)		miR-181c-5p(1)//miR-181d-5p(1)	miR-181c-5p(1)//miR-181d-5p(1)	0.625	NA	NA	NA	NA	0	0.625
SLC4A7		mmu-miR-181c(1)	mmu-miR-181c-5p(1)//mmu-miR-181d-5p(1)		miR-181c-5p(1)//miR-181d-5p(1)	miR-181c-5p(1)//miR-181d-5p(1)	0.625	NA	NA	NA	NA	0	0.625
SMS		mmu-miR-181c(1)	mmu-miR-181c-5p(1)//mmu-miR-181d-5p(1)		miR-181c-5p(1)//miR-181d-5p(1)	miR-181c-5p(1)//miR-181d-5p(1)	0.625	NA	NA	NA	NA	0	0.625
SP3		mmu-miR-181d(1)	mmu-miR-181c-5p(1)//mmu-miR-181d-5p(1)		miR-181c-5p(1)//miR-181d-5p(1)	miR-181c-5p(1)//miR-181d-5p(1)	0.625	NA	NA	NA	NA	0	0.625
TEF		mmu-miR-181c(1)	mmu-miR-181c-5p(1)//mmu-miR-181d-5p(1)		miR-181c-5p(1)//miR-181d-5p(1)	miR-181c-5p(1)//miR-181d-5p(1)	0.625	NA	NA	NA	NA	0	0.625
TMEM127	mmu-miR-181c-5p(1)//mmu-miR-181d-5p(1)	mmu-miR-181d(1)			miR-181c-5p(1)//miR-181d-5p(1)	miR-181c-5p(1)//miR-181d-5p(1)	0.625	NA	NA	NA	NA	0	0.625
TMEM64		mmu-miR-181c(1)//mmu-miR-181d(1)	mmu-miR-181d-5p(1)		miR-181c-5p(1)//miR-181d-5p(1)	miR-181c-5p(1)//miR-181d-5p(1)	0.625	NA	NA	NA	NA	0	0.625
TROVE2		mmu-miR-181c(1)	mmu-miR-181c-5p(1)//mmu-miR-181d-5p(1)		miR-181c-5p(1)//miR-181d-5p(1)	miR-181c-5p(1)//miR-181d-5p(1)	0.625	NA	NA	NA	NA	0	0.625
TRRAP		mmu-miR-181d(1)	mmu-miR-181c-5p(1)//mmu-miR-181d-5p(1)		miR-181c-5p(1)//miR-181d-5p(1)	miR-181c-5p(1)//miR-181d-5p(1)	0.625	NA	NA	NA	NA	0	0.625
UBAP2L		mmu-miR-181c(1)//mmu-miR-181d(1)	mmu-miR-181d-5p(1)		miR-181c-5p(1)//miR-181d-5p(1)	miR-181c-5p(1)//miR-181d-5p(1)	0.625	NA	NA	NA	NA	0	0.625
VTA1		mmu-miR-181d(1)	mmu-miR-181c-5p(1)//mmu-miR-181d-5p(1)		miR-181c-5p(1)//miR-181d-5p(1)	miR-181c-5p(1)//miR-181d-5p(1)	0.625	NA	NA	NA	NA	0	0.625
ACSL1	mmu-miR-181c-5p(1)//mmu-miR-181d-5p(1)	mmu-miR-181c(1)//mmu-miR-181d(1)	mmu-miR-181c-5p(1)//mmu-miR-181d-5p(1)	mmu-miR-181c(1)//mmu-miR-181d(1)			0.6	NA	NA	NA	NA	0	0.6
ANP32E		mmu-miR-181c(1)//mmu-miR-181d(1)	mmu-miR-181c-5p(1)//mmu-miR-181d-5p(1)		miR-181c-5p(1)	miR-181c-5p(1)//miR-181d-5p(1)	0.6	NA	NA	NA	NA	0	0.6
AP1G1	mmu-miR-181c-5p(3)//mmu-miR-181d-5p(3)	mmu-miR-181c(2)//mmu-miR-181d(2)			miR-181d-5p(1)	miR-181c-5p(1)//miR-181d-5p(1)	0.6	NA	NA	NA	NA	0	0.6
ARHGAP26		mmu-miR-181c(1)//mmu-miR-181d(1)	mmu-miR-181c-5p(1)//mmu-miR-181d-5p(1)		miR-181c-5p(1)	miR-181c-5p(1)//miR-181d-5p(1)	0.6	NA	NA	NA	NA	0	0.6
ASXL2	mmu-miR-181c-5p(1)//mmu-miR-181d-5p(1)		mmu-miR-181c-5p(1)//mmu-miR-181d-5p(1)		miR-181c-5p(1)	miR-181c-5p(1)//miR-181d-5p(1)	0.6	NA	NA	NA	NA	0	0.6
ATP9B		mmu-miR-181c(1)//mmu-miR-181d(1)	mmu-miR-181c-5p(1)//mmu-miR-181d-5p(1)		miR-181d-5p(1)	miR-181c-5p(1)//miR-181d-5p(1)	0.6	NA	NA	NA	NA	0	0.6
ATXN3		mmu-miR-181c(1)//mmu-miR-181d(2)	mmu-miR-181c-5p(1)//mmu-miR-181d-5p(1)		miR-181c-5p(1)	miR-181c-5p(1)//miR-181d-5p(1)	0.6	NA	NA	NA	NA	0	0.6
BAI3	mmu-miR-181c-5p(1)//mmu-miR-181d-5p(1)	mmu-miR-181c(2)//mmu-miR-181d(3)	mmu-miR-181c-5p(1)//mmu-miR-181d-5p(1)	mmu-miR-181c(1)//mmu-miR-181d(1)			0.6	NA	NA	NA	NA	0	0.6
BCL9	mmu-miR-181c-5p(1)//mmu-miR-181d-5p(1)		mmu-miR-181c-5p(1)//mmu-miR-181d-5p(1)		miR-181c-5p(1)	miR-181c-5p(1)//miR-181d-5p(1)	0.6	NA	NA	NA	NA	0	0.6
C77370	mmu-miR-181c-5p(3)//mmu-miR-181d-5p(3)	mmu-miR-181c(6)//mmu-miR-181d(6)	mmu-miR-181c-5p(1)//mmu-miR-181d-5p(1)	mmu-miR-181c(3)//mmu-miR-181d(3)			0.6	NA	NA	NA	NA	0	0.6
CAB39		mmu-miR-181c(2)//mmu-miR-181d(2)	mmu-miR-181c-5p(1)//mmu-miR-181d-5p(1)		miR-181d-5p(1)	miR-181c-5p(1)//miR-181d-5p(1)	0.6	NA	NA	NA	NA	0	0.6
CALB1	mmu-miR-181c-5p(1)//mmu-miR-181d-5p(1)	mmu-miR-181c(1)//mmu-miR-181d(2)	mmu-miR-181c-5p(1)//mmu-miR-181d-5p(1)	mmu-miR-181c(1)//mmu-miR-181d(1)			0.6	NA	NA	NA	NA	0	0.6
CAPRIN2		mmu-miR-181c(1)//mmu-miR-181d(1)	mmu-miR-181c-5p(1)//mmu-miR-181d-5p(1)		miR-181c-5p(1)	miR-181c-5p(1)//miR-181d-5p(1)	0.6	NA	NA	NA	NA	0	0.6
CCDC25		mmu-miR-181c(1)//mmu-miR-181d(1)	mmu-miR-181c-5p(1)//mmu-miR-181d-5p(1)		miR-181d-5p(1)	miR-181c-5p(1)//miR-181d-5p(1)	0.6	NA	NA	NA	NA	0	0.6
CCNT1	mmu-miR-181c-5p(1)//mmu-miR-181d-5p(1)		mmu-miR-181c-5p(1)//mmu-miR-181d-5p(1)		miR-181d-5p(1)	miR-181c-5p(1)//miR-181d-5p(1)	0.6	NA	NA	NA	NA	0	0.6
CDR2		mmu-miR-181c(1)//mmu-miR-181d(1)	mmu-miR-181c-5p(1)//mmu-miR-181d-5p(1)		miR-181d-5p(1)	miR-181c-5p(1)//miR-181d-5p(1)	0.6	NA	NA	NA	NA	0	0.6
CNKSR2	mmu-miR-181c-5p(1)//mmu-miR-181d-5p(1)	mmu-miR-181c(1)//mmu-miR-181d(3)	mmu-miR-181c-5p(1)//mmu-miR-181d-5p(1)	mmu-miR-181c(1)//mmu-miR-181d(1)			0.6	NA	NA	NA	NA	0	0.6
CNOT4		mmu-miR-181c(2)//mmu-miR-181d(3)	mmu-miR-181c-5p(1)//mmu-miR-181d-5p(1)		miR-181c-5p(1)	miR-181c-5p(1)//miR-181d-5p(1)	0.6	NA	NA	NA	NA	0	0.6
CNTN4	mmu-miR-181c-5p(1)//mmu-miR-181d-5p(1)	mmu-miR-181c(4)//mmu-miR-181d(5)	mmu-miR-181c-5p(1)//mmu-miR-181d-5p(1)	mmu-miR-181c(1)//mmu-miR-181d(1)			0.6	NA	NA	NA	NA	0	0.6
CST6	mmu-miR-181c-5p(1)//mmu-miR-181d-5p(1)	mmu-miR-181c(1)//mmu-miR-181d(1)	mmu-miR-181c-5p(1)//mmu-miR-181d-5p(1)	mmu-miR-181c(1)//mmu-miR-181d(1)			0.6	NA	NA	NA	NA	0	0.6
D3BWG0562E	mmu-miR-181c-5p(1)//mmu-miR-181d-5p(1)	mmu-miR-181c(1)//mmu-miR-181d(1)	mmu-miR-181c-5p(1)//mmu-miR-181d-5p(1)	mmu-miR-181c(1)//mmu-miR-181d(1)			0.6	NA	NA	NA	NA	0	0.6
DAGLA	mmu-miR-181c-5p(1)//mmu-miR-181d-5p(1)	mmu-miR-181c(1)//mmu-miR-181d(1)	mmu-miR-181c-5p(1)//mmu-miR-181d-5p(1)	mmu-miR-181c(2)//mmu-miR-181d(2)			0.6	NA	NA	NA	NA	0	0.6
DHX33		mmu-miR-181c(2)//mmu-miR-181d(2)	mmu-miR-181c-5p(1)//mmu-miR-181d-5p(1)		miR-181c-5p(1)	miR-181c-5p(1)//miR-181d-5p(1)	0.6	NA	NA	NA	NA	0	0.6
DIP2B	mmu-miR-181c-5p(1)//mmu-miR-181d-5p(1)		mmu-miR-181c-5p(1)//mmu-miR-181d-5p(1)		miR-181c-5p(1)	miR-181c-5p(1)//miR-181d-5p(1)	0.6	NA	NA	NA	NA	0	0.6
DRD1A	mmu-miR-181c-5p(1)//mmu-miR-181d-5p(1)	mmu-miR-181c(2)//mmu-miR-181d(2)	mmu-miR-181c-5p(1)//mmu-miR-181d-5p(1)	mmu-miR-181c(1)//mmu-miR-181d(1)			0.6	NA	NA	NA	NA	0	0.6
DUSP5	mmu-miR-181c-5p(1)//mmu-miR-181d-5p(1)		mmu-miR-181c-5p(1)//mmu-miR-181d-5p(1)		miR-181c-5p(1)	miR-181c-5p(1)//miR-181d-5p(1)	0.6	NA	NA	NA	NA	0	0.6
EDEM1		mmu-miR-181c(3)//mmu-miR-181d(6)	mmu-miR-181c-5p(1)//mmu-miR-181d-5p(1)		miR-181c-5p(1)	miR-181c-5p(1)//miR-181d-5p(1)	0.6	NA	NA	NA	NA	0	0.6
ELTD1	mmu-miR-181c-5p(1)//mmu-miR-181d-5p(1)	mmu-miR-181c(1)//mmu-miR-181d(1)	mmu-miR-181c-5p(1)//mmu-miR-181d-5p(1)	mmu-miR-181c(1)//mmu-miR-181d(1)			0.6	NA	NA	NA	NA	0	0.6
ENAH	mmu-miR-181c-5p(2)//mmu-miR-181d-5p(2)		mmu-miR-181c-5p(1)//mmu-miR-181d-5p(1)		miR-181d-5p(1)	miR-181c-5p(1)//miR-181d-5p(1)	0.6	NA	NA	NA	NA	0	0.6
EPC1		mmu-miR-181c(2)//mmu-miR-181d(2)	mmu-miR-181c-5p(1)//mmu-miR-181d-5p(1)		miR-181c-5p(1)	miR-181c-5p(1)//miR-181d-5p(1)	0.6	NA	NA	NA	NA	0	0.6
ESM1	mmu-miR-181c-5p(1)//mmu-miR-181d-5p(1)	mmu-miR-181c(2)//mmu-miR-181d(2)	mmu-miR-181c-5p(1)//mmu-miR-181d-5p(1)	mmu-miR-181c(1)//mmu-miR-181d(1)			0.6	NA	NA	NA	NA	0	0.6
EVX1	mmu-miR-181c-5p(1)//mmu-miR-181d-5p(1)	mmu-miR-181c(1)//mmu-miR-181d(2)	mmu-miR-181c-5p(1)//mmu-miR-181d-5p(1)	mmu-miR-181c(2)//mmu-miR-181d(2)			0.6	NA	NA	NA	NA	0	0.6
FAF1	mmu-miR-181c-5p(1)//mmu-miR-181d-5p(1)	mmu-miR-181c(1)//mmu-miR-181d(1)	mmu-miR-181c-5p(1)//mmu-miR-181d-5p(1)	mmu-miR-181c(1)//mmu-miR-181d(1)			0.6	NA	NA	NA	NA	0	0.6
FAM49B		mmu-miR-181c(1)//mmu-miR-181d(1)	mmu-miR-181c-5p(1)//mmu-miR-181d-5p(1)		miR-181c-5p(1)	miR-181c-5p(1)//miR-181d-5p(1)	0.6	NA	NA	NA	NA	0	0.6
FAR1		mmu-miR-181c(2)//mmu-miR-181d(2)	mmu-miR-181c-5p(1)//mmu-miR-181d-5p(1)		miR-181c-5p(1)	miR-181c-5p(1)//miR-181d-5p(1)	0.6	NA	NA	NA	NA	0	0.6
FBXO3		mmu-miR-181c(1)//mmu-miR-181d(1)	mmu-miR-181c-5p(1)//mmu-miR-181d-5p(1)		miR-181d-5p(1)	miR-181c-5p(1)//miR-181d-5p(1)	0.6	NA	NA	NA	NA	0	0.6
FLT1	mmu-miR-181c-5p(1)//mmu-miR-181d-5p(1)		mmu-miR-181c-5p(1)//mmu-miR-181d-5p(1)		miR-181c-5p(1)	miR-181c-5p(1)//miR-181d-5p(1)	0.6	NA	NA	NA	NA	0	0.6
GAS7	mmu-miR-181c-5p(1)//mmu-miR-181d-5p(1)		mmu-miR-181c-5p(1)//mmu-miR-181d-5p(1)		miR-181d-5p(1)	miR-181c-5p(1)//miR-181d-5p(1)	0.6	NA	NA	NA	NA	0	0.6
GM996	mmu-miR-181c-5p(1)//mmu-miR-181d-5p(1)	mmu-miR-181c(1)//mmu-miR-181d(1)	mmu-miR-181c-5p(1)//mmu-miR-181d-5p(1)	mmu-miR-181c(1)//mmu-miR-181d(1)			0.6	NA	NA	NA	NA	0	0.6
GRM1	mmu-miR-181c-5p(1)//mmu-miR-181d-5p(1)	mmu-miR-181c(1)//mmu-miR-181d(1)	mmu-miR-181c-5p(1)//mmu-miR-181d-5p(1)	mmu-miR-181c(1)//mmu-miR-181d(1)			0.6	NA	NA	NA	NA	0	0.6
HAND2	mmu-miR-181c-5p(1)//mmu-miR-181d-5p(1)	mmu-miR-181c(1)//mmu-miR-181d(2)	mmu-miR-181c-5p(1)//mmu-miR-181d-5p(1)	mmu-miR-181c(1)//mmu-miR-181d(1)			0.6	NA	NA	NA	NA	0	0.6
HOMER1	mmu-miR-181c-5p(1)//mmu-miR-181d-5p(1)		mmu-miR-181c-5p(1)//mmu-miR-181d-5p(1)		miR-181d-5p(1)	miR-181c-5p(1)//miR-181d-5p(1)	0.6	NA	NA	NA	NA	0	0.6
HSD17B7		mmu-miR-181c(1)//mmu-miR-181d(1)	mmu-miR-181c-5p(1)//mmu-miR-181d-5p(1)		miR-181d-5p(1)	miR-181c-5p(1)//miR-181d-5p(1)	0.6	NA	NA	NA	NA	0	0.6
HTR1A	mmu-miR-181c-5p(1)//mmu-miR-181d-5p(1)	mmu-miR-181c(1)//mmu-miR-181d(1)	mmu-miR-181c-5p(1)//mmu-miR-181d-5p(1)	mmu-miR-181c(1)//mmu-miR-181d(1)			0.6	NA	NA	NA	NA	0	0.6
IL6ST		mmu-miR-181c(1)//mmu-miR-181d(1)	mmu-miR-181c-5p(1)//mmu-miR-181d-5p(1)		miR-181d-5p(1)	miR-181c-5p(1)//miR-181d-5p(1)	0.6	NA	NA	NA	NA	0	0.6
INPP4A		mmu-miR-181c(2)//mmu-miR-181d(3)	mmu-miR-181c-5p(1)//mmu-miR-181d-5p(1)		miR-181c-5p(1)	miR-181c-5p(1)//miR-181d-5p(1)	0.6	NA	NA	NA	NA	0	0.6
INSR		mmu-miR-181c(1)//mmu-miR-181d(1)	mmu-miR-181c-5p(1)//mmu-miR-181d-5p(1)		miR-181d-5p(1)	miR-181c-5p(1)//miR-181d-5p(1)	0.6	NA	NA	NA	NA	0	0.6
ISCA1		mmu-miR-181c(1)//mmu-miR-181d(1)	mmu-miR-181c-5p(1)//mmu-miR-181d-5p(1)		miR-181c-5p(1)	miR-181c-5p(1)//miR-181d-5p(1)	0.6	NA	NA	NA	NA	0	0.6
ITGA2		mmu-miR-181c(1)//mmu-miR-181d(1)	mmu-miR-181c-5p(1)//mmu-miR-181d-5p(1)		miR-181c-5p(1)	miR-181c-5p(1)//miR-181d-5p(1)	0.6	NA	NA	NA	NA	0	0.6
ITSN2	mmu-miR-181c-5p(1)//mmu-miR-181d-5p(1)	mmu-miR-181c(5)//mmu-miR-181d(5)			miR-181d-5p(1)	miR-181c-5p(1)//miR-181d-5p(1)	0.6	NA	NA	NA	NA	0	0.6
KCNQ5	mmu-miR-181c-5p(2)//mmu-miR-181d-5p(2)		mmu-miR-181c-5p(1)//mmu-miR-181d-5p(1)		miR-181c-5p(1)	miR-181c-5p(1)//miR-181d-5p(1)	0.6	NA	NA	NA	NA	0	0.6
KHSRP		mmu-miR-181c(1)//mmu-miR-181d(1)	mmu-miR-181c-5p(1)//mmu-miR-181d-5p(1)		miR-181d-5p(1)	miR-181c-5p(1)//miR-181d-5p(1)	0.6	NA	NA	NA	NA	0	0.6
KIF1B	mmu-miR-181c-5p(1)//mmu-miR-181d-5p(1)	mmu-miR-181c(1)//mmu-miR-181d(1)			miR-181d-5p(1)	miR-181c-5p(1)//miR-181d-5p(1)	0.6	NA	NA	NA	NA	0	0.6
KLHL1	mmu-miR-181c-5p(1)//mmu-miR-181d-5p(1)	mmu-miR-181c(2)//mmu-miR-181d(2)	mmu-miR-181c-5p(1)//mmu-miR-181d-5p(1)	mmu-miR-181c(1)//mmu-miR-181d(1)			0.6	NA	NA	NA	NA	0	0.6
L1CAM	mmu-miR-181c-5p(1)//mmu-miR-181d-5p(1)		mmu-miR-181c-5p(1)//mmu-miR-181d-5p(1)		miR-181c-5p(1)	miR-181c-5p(1)//miR-181d-5p(1)	0.6	NA	NA	NA	NA	0	0.6
LAMC1		mmu-miR-181c(2)//mmu-miR-181d(2)	mmu-miR-181c-5p(1)//mmu-miR-181d-5p(1)		miR-181c-5p(1)	miR-181c-5p(1)//miR-181d-5p(1)	0.6	NA	NA	NA	NA	0	0.6
LCOR	mmu-miR-181c-5p(1)//mmu-miR-181d-5p(1)	mmu-miR-181c(1)//mmu-miR-181d(1)			miR-181d-5p(1)	miR-181c-5p(1)//miR-181d-5p(1)	0.6	NA	NA	NA	NA	0	0.6
LHFPL4	mmu-miR-181c-5p(1)//mmu-miR-181d-5p(1)	mmu-miR-181c(1)//mmu-miR-181d(1)	mmu-miR-181c-5p(1)//mmu-miR-181d-5p(1)	mmu-miR-181c(1)//mmu-miR-181d(1)			0.6	NA	NA	NA	NA	0	0.6
LHX9	mmu-miR-181c-5p(1)//mmu-miR-181d-5p(1)	mmu-miR-181c(1)//mmu-miR-181d(2)	mmu-miR-181c-5p(1)//mmu-miR-181d-5p(1)	mmu-miR-181c(1)//mmu-miR-181d(1)			0.6	NA	NA	NA	NA	0	0.6
LMO1	mmu-miR-181c-5p(1)//mmu-miR-181d-5p(1)	mmu-miR-181c(1)//mmu-miR-181d(1)	mmu-miR-181c-5p(1)//mmu-miR-181d-5p(1)	mmu-miR-181c(1)//mmu-miR-181d(1)			0.6	NA	NA	NA	NA	0	0.6
LRRN1	mmu-miR-181c-5p(1)//mmu-miR-181d-5p(1)	mmu-miR-181c(1)//mmu-miR-181d(2)	mmu-miR-181c-5p(1)//mmu-miR-181d-5p(1)	mmu-miR-181c(1)//mmu-miR-181d(1)			0.6	NA	NA	NA	NA	0	0.6
MSTN	mmu-miR-181c-5p(1)//mmu-miR-181d-5p(1)	mmu-miR-181c(1)//mmu-miR-181d(1)	mmu-miR-181c-5p(1)//mmu-miR-181d-5p(1)	mmu-miR-181c(1)//mmu-miR-181d(1)			0.6	NA	NA	NA	NA	0	0.6
NAT8L	mmu-miR-181c-5p(1)//mmu-miR-181d-5p(1)		mmu-miR-181c-5p(1)//mmu-miR-181d-5p(1)		miR-181c-5p(1)	miR-181c-5p(1)//miR-181d-5p(1)	0.6	NA	NA	NA	NA	0	0.6
NBR1		mmu-miR-181c(2)//mmu-miR-181d(2)	mmu-miR-181c-5p(1)//mmu-miR-181d-5p(1)		miR-181c-5p(1)	miR-181c-5p(1)//miR-181d-5p(1)	0.6	NA	NA	NA	NA	0	0.6
NEU3		mmu-miR-181c(1)//mmu-miR-181d(1)	mmu-miR-181c-5p(1)//mmu-miR-181d-5p(1)		miR-181c-5p(1)	miR-181c-5p(1)//miR-181d-5p(1)	0.6	NA	NA	NA	NA	0	0.6
NMNAT2	mmu-miR-181c-5p(1)//mmu-miR-181d-5p(1)	mmu-miR-181c(1)//mmu-miR-181d(1)	mmu-miR-181c-5p(1)//mmu-miR-181d-5p(1)	mmu-miR-181c(1)//mmu-miR-181d(1)			0.6	NA	NA	NA	NA	0	0.6
NR2C2	mmu-miR-181c-5p(1)//mmu-miR-181d-5p(1)		mmu-miR-181c-5p(1)//mmu-miR-181d-5p(1)		miR-181c-5p(1)	miR-181c-5p(1)//miR-181d-5p(1)	0.6	NA	NA	NA	NA	0	0.6
NRP1		mmu-miR-181c(1)//mmu-miR-181d(3)	mmu-miR-181c-5p(1)//mmu-miR-181d-5p(1)		miR-181c-5p(1)	miR-181c-5p(1)//miR-181d-5p(1)	0.6	NA	NA	NA	NA	0	0.6
NT5E		mmu-miR-181c(1)//mmu-miR-181d(1)	mmu-miR-181c-5p(1)//mmu-miR-181d-5p(1)		miR-181c-5p(1)	miR-181c-5p(1)//miR-181d-5p(1)	0.6	NA	NA	NA	NA	0	0.6
NUB1		mmu-miR-181c(1)//mmu-miR-181d(1)	mmu-miR-181c-5p(1)//mmu-miR-181d-5p(1)		miR-181c-5p(1)	miR-181c-5p(1)//miR-181d-5p(1)	0.6	NA	NA	NA	NA	0	0.6
NUS1	mmu-miR-181c-5p(1)//mmu-miR-181d-5p(1)		mmu-miR-181c-5p(1)//mmu-miR-181d-5p(1)		miR-181d-5p(1)	miR-181c-5p(1)//miR-181d-5p(1)	0.6	NA	NA	NA	NA	0	0.6
OLFM3	mmu-miR-181c-5p(1)//mmu-miR-181d-5p(1)	mmu-miR-181c(1)//mmu-miR-181d(1)	mmu-miR-181c-5p(1)//mmu-miR-181d-5p(1)	mmu-miR-181c(1)//mmu-miR-181d(1)			0.6	NA	NA	NA	NA	0	0.6
P2RY1		mmu-miR-181c(2)//mmu-miR-181d(2)	mmu-miR-181c-5p(1)//mmu-miR-181d-5p(1)		miR-181c-5p(1)	miR-181c-5p(1)//miR-181d-5p(1)	0.6	NA	NA	NA	NA	0	0.6
PEG10		mmu-miR-181c(1)//mmu-miR-181d(1)	mmu-miR-181c-5p(1)//mmu-miR-181d-5p(1)		miR-181c-5p(1)	miR-181c-5p(1)//miR-181d-5p(1)	0.6	NA	NA	NA	NA	0	0.6
PER2		mmu-miR-181c(1)//mmu-miR-181d(1)	mmu-miR-181c-5p(1)//mmu-miR-181d-5p(1)		miR-181c-5p(1)	miR-181c-5p(1)//miR-181d-5p(1)	0.6	NA	NA	NA	NA	0	0.6
PGRMC2		mmu-miR-181c(2)//mmu-miR-181d(1)	mmu-miR-181c-5p(1)//mmu-miR-181d-5p(1)		miR-181d-5p(1)	miR-181c-5p(1)//miR-181d-5p(1)	0.6	NA	NA	NA	NA	0	0.6
PKNOX1		mmu-miR-181c(1)//mmu-miR-181d(1)	mmu-miR-181c-5p(1)//mmu-miR-181d-5p(1)		miR-181c-5p(1)	miR-181c-5p(1)//miR-181d-5p(1)	0.6	NA	NA	NA	NA	0	0.6
PLAG1	mmu-miR-181c-5p(2)//mmu-miR-181d-5p(2)		mmu-miR-181c-5p(1)//mmu-miR-181d-5p(1)		miR-181c-5p(1)	miR-181c-5p(1)//miR-181d-5p(1)	0.6	NA	NA	NA	NA	0	0.6
PLEKHA1		mmu-miR-181c(1)//mmu-miR-181d(1)	mmu-miR-181c-5p(1)//mmu-miR-181d-5p(1)		miR-181c-5p(1)	miR-181c-5p(1)//miR-181d-5p(1)	0.6	NA	NA	NA	NA	0	0.6
PLEKHA2		mmu-miR-181c(2)//mmu-miR-181d(2)	mmu-miR-181c-5p(1)//mmu-miR-181d-5p(1)		miR-181c-5p(1)	miR-181c-5p(1)//miR-181d-5p(1)	0.6	NA	NA	NA	NA	0	0.6
PMAIP1		mmu-miR-181c(2)//mmu-miR-181d(1)	mmu-miR-181c-5p(1)//mmu-miR-181d-5p(1)		miR-181c-5p(1)	miR-181c-5p(1)//miR-181d-5p(1)	0.6	NA	NA	NA	NA	0	0.6
PPM1A		mmu-miR-181c(1)//mmu-miR-181d(1)	mmu-miR-181c-5p(1)//mmu-miR-181d-5p(1)		miR-181c-5p(1)	miR-181c-5p(1)//miR-181d-5p(1)	0.6	NA	NA	NA	NA	0	0.6
PPM1B	mmu-miR-181c-5p(1)//mmu-miR-181d-5p(1)	mmu-miR-181c(1)//mmu-miR-181d(2)	mmu-miR-181c-5p(1)//mmu-miR-181d-5p(1)	mmu-miR-181c(1)//mmu-miR-181d(1)			0.6	NA	NA	NA	NA	0	0.6
PPP2R5E		mmu-miR-181c(1)//mmu-miR-181d(2)	mmu-miR-181c-5p(1)//mmu-miR-181d-5p(1)		miR-181c-5p(1)	miR-181c-5p(1)//miR-181d-5p(1)	0.6	NA	NA	NA	NA	0	0.6
PPP4R2	mmu-miR-181c-5p(1)//mmu-miR-181d-5p(1)	mmu-miR-181c(1)//mmu-miR-181d(1)			miR-181c-5p(1)	miR-181c-5p(1)//miR-181d-5p(1)	0.6	NA	NA	NA	NA	0	0.6
PRKRA		mmu-miR-181c(1)//mmu-miR-181d(1)	mmu-miR-181c-5p(1)//mmu-miR-181d-5p(1)		miR-181d-5p(1)	miR-181c-5p(1)//miR-181d-5p(1)	0.6	NA	NA	NA	NA	0	0.6
PROS1		mmu-miR-181c(2)//mmu-miR-181d(3)	mmu-miR-181c-5p(1)//mmu-miR-181d-5p(1)		miR-181c-5p(1)	miR-181c-5p(1)//miR-181d-5p(1)	0.6	NA	NA	NA	NA	0	0.6
PROSC	mmu-miR-181c-5p(1)//mmu-miR-181d-5p(1)	mmu-miR-181c(2)//mmu-miR-181d(2)	mmu-miR-181c-5p(1)//mmu-miR-181d-5p(1)	mmu-miR-181c(1)//mmu-miR-181d(1)			0.6	NA	NA	NA	NA	0	0.6
PXDN		mmu-miR-181c(4)//mmu-miR-181d(6)	mmu-miR-181c-5p(1)//mmu-miR-181d-5p(1)		miR-181d-5p(1)	miR-181c-5p(1)//miR-181d-5p(1)	0.6	NA	NA	NA	NA	0	0.6
RASL2-9	mmu-miR-181c-5p(1)//mmu-miR-181d-5p(1)	mmu-miR-181c(1)//mmu-miR-181d(1)	mmu-miR-181c-5p(1)//mmu-miR-181d-5p(1)	mmu-miR-181c(1)//mmu-miR-181d(1)			0.6	NA	NA	NA	NA	0	0.6
RBM38		mmu-miR-181c(1)//mmu-miR-181d(1)	mmu-miR-181c-5p(1)//mmu-miR-181d-5p(1)		miR-181c-5p(1)	miR-181c-5p(1)//miR-181d-5p(1)	0.6	NA	NA	NA	NA	0	0.6
RCN2		mmu-miR-181c(2)//mmu-miR-181d(2)	mmu-miR-181c-5p(1)//mmu-miR-181d-5p(1)		miR-181d-5p(1)	miR-181c-5p(1)//miR-181d-5p(1)	0.6	NA	NA	NA	NA	0	0.6
RPS6KA6	mmu-miR-181c-5p(1)//mmu-miR-181d-5p(1)	mmu-miR-181c(1)//mmu-miR-181d(1)	mmu-miR-181c-5p(1)//mmu-miR-181d-5p(1)	mmu-miR-181c(1)//mmu-miR-181d(1)			0.6	NA	NA	NA	NA	0	0.6
RREB1		mmu-miR-181c(3)//mmu-miR-181d(2)	mmu-miR-181c-5p(1)//mmu-miR-181d-5p(1)		miR-181d-5p(1)	miR-181c-5p(1)//miR-181d-5p(1)	0.6	NA	NA	NA	NA	0	0.6
SESN3	mmu-miR-181c-5p(3)//mmu-miR-181d-5p(3)	mmu-miR-181c(1)//mmu-miR-181d(1)			miR-181c-5p(1)	miR-181c-5p(1)//miR-181d-5p(1)	0.6	NA	NA	NA	NA	0	0.6
SIK3	mmu-miR-181c-5p(1)//mmu-miR-181d-5p(1)		mmu-miR-181c-5p(1)//mmu-miR-181d-5p(1)		miR-181c-5p(1)	miR-181c-5p(1)//miR-181d-5p(1)	0.6	NA	NA	NA	NA	0	0.6
SIX2	mmu-miR-181c-5p(1)//mmu-miR-181d-5p(1)	mmu-miR-181c(1)//mmu-miR-181d(1)	mmu-miR-181c-5p(1)//mmu-miR-181d-5p(1)	mmu-miR-181c(1)//mmu-miR-181d(1)			0.6	NA	NA	NA	NA	0	0.6
SLC35A3		mmu-miR-181c(3)//mmu-miR-181d(2)	mmu-miR-181c-5p(1)//mmu-miR-181d-5p(1)		miR-181c-5p(1)	miR-181c-5p(1)//miR-181d-5p(1)	0.6	NA	NA	NA	NA	0	0.6
SOD2		mmu-miR-181c(2)//mmu-miR-181d(2)	mmu-miR-181c-5p(1)//mmu-miR-181d-5p(1)		miR-181d-5p(1)	miR-181c-5p(1)//miR-181d-5p(1)	0.6	NA	NA	NA	NA	0	0.6
SOWAHA	mmu-miR-181c-5p(1)//mmu-miR-181d-5p(1)		mmu-miR-181c-5p(1)//mmu-miR-181d-5p(1)		miR-181c-5p(1)	miR-181c-5p(1)//miR-181d-5p(1)	0.6	NA	NA	NA	NA	0	0.6
SRD5A3		mmu-miR-181c(1)//mmu-miR-181d(1)	mmu-miR-181c-5p(1)//mmu-miR-181d-5p(1)		miR-181d-5p(1)	miR-181c-5p(1)//miR-181d-5p(1)	0.6	NA	NA	NA	NA	0	0.6
STAG2		mmu-miR-181c(1)//mmu-miR-181d(2)	mmu-miR-181c-5p(1)//mmu-miR-181d-5p(1)		miR-181c-5p(1)	miR-181c-5p(1)//miR-181d-5p(1)	0.6	NA	NA	NA	NA	0	0.6
STK35		mmu-miR-181c(2)//mmu-miR-181d(2)	mmu-miR-181c-5p(1)//mmu-miR-181d-5p(1)		miR-181d-5p(1)	miR-181c-5p(1)//miR-181d-5p(1)	0.6	NA	NA	NA	NA	0	0.6
STRBP	mmu-miR-181c-5p(1)//mmu-miR-181d-5p(1)		mmu-miR-181c-5p(1)//mmu-miR-181d-5p(1)		miR-181c-5p(1)	miR-181c-5p(1)//miR-181d-5p(1)	0.6	NA	NA	NA	NA	0	0.6
TADA2B	mmu-miR-181c-5p(1)//mmu-miR-181d-5p(1)		mmu-miR-181c-5p(1)//mmu-miR-181d-5p(1)		miR-181c-5p(1)	miR-181c-5p(1)//miR-181d-5p(1)	0.6	NA	NA	NA	NA	0	0.6
TBK1		mmu-miR-181c(1)//mmu-miR-181d(1)	mmu-miR-181c-5p(1)//mmu-miR-181d-5p(1)		miR-181d-5p(1)	miR-181c-5p(1)//miR-181d-5p(1)	0.6	NA	NA	NA	NA	0	0.6
TIMP2		mmu-miR-181c(2)//mmu-miR-181d(2)	mmu-miR-181c-5p(1)//mmu-miR-181d-5p(1)		miR-181d-5p(1)	miR-181c-5p(1)//miR-181d-5p(1)	0.6	NA	NA	NA	NA	0	0.6
TMEM151B	mmu-miR-181c-5p(1)//mmu-miR-181d-5p(1)	mmu-miR-181c(1)//mmu-miR-181d(1)	mmu-miR-181c-5p(1)//mmu-miR-181d-5p(1)	mmu-miR-181c(1)//mmu-miR-181d(1)			0.6	NA	NA	NA	NA	0	0.6
TOX	mmu-miR-181c-5p(1)//mmu-miR-181d-5p(1)	mmu-miR-181c(1)//mmu-miR-181d(1)	mmu-miR-181c-5p(1)//mmu-miR-181d-5p(1)	mmu-miR-181c(1)//mmu-miR-181d(1)			0.6	NA	NA	NA	NA	0	0.6
TRAK2			mmu-miR-181c-5p(1)//mmu-miR-181d-5p(1)	mmu-miR-181c(1)//mmu-miR-181d(1)	miR-181c-5p(1)	miR-181c-5p(1)//miR-181d-5p(1)	0.6	NA	NA	NA	NA	0	0.6
TRUB1		mmu-miR-181c(3)//mmu-miR-181d(4)	mmu-miR-181c-5p(1)//mmu-miR-181d-5p(1)		miR-181c-5p(1)	miR-181c-5p(1)//miR-181d-5p(1)	0.6	NA	NA	NA	NA	0	0.6
TSPYL4		mmu-miR-181c(1)//mmu-miR-181d(1)	mmu-miR-181c-5p(1)//mmu-miR-181d-5p(1)		miR-181c-5p(1)	miR-181c-5p(1)//miR-181d-5p(1)	0.6	NA	NA	NA	NA	0	0.6
UBE2Q1		mmu-miR-181c(2)//mmu-miR-181d(3)	mmu-miR-181c-5p(1)//mmu-miR-181d-5p(1)		miR-181d-5p(1)	miR-181c-5p(1)//miR-181d-5p(1)	0.6	NA	NA	NA	NA	0	0.6
VSX1	mmu-miR-181c-5p(1)//mmu-miR-181d-5p(1)	mmu-miR-181c(1)//mmu-miR-181d(2)	mmu-miR-181c-5p(1)//mmu-miR-181d-5p(1)	mmu-miR-181c(1)//mmu-miR-181d(1)			0.6	NA	NA	NA	NA	0	0.6
ZCCHC2		mmu-miR-181c(2)//mmu-miR-181d(2)	mmu-miR-181c-5p(1)//mmu-miR-181d-5p(1)		miR-181c-5p(1)	miR-181c-5p(1)//miR-181d-5p(1)	0.6	NA	NA	NA	NA	0	0.6
ZCCHC3		mmu-miR-181c(1)//mmu-miR-181d(1)	mmu-miR-181c-5p(1)//mmu-miR-181d-5p(1)		miR-181c-5p(1)	miR-181c-5p(1)//miR-181d-5p(1)	0.6	NA	NA	NA	NA	0	0.6
ZFP644		mmu-miR-181c(2)//mmu-miR-181d(2)	mmu-miR-181c-5p(1)//mmu-miR-181d-5p(1)		miR-181c-5p(1)	miR-181c-5p(1)//miR-181d-5p(1)	0.6	NA	NA	NA	NA	0	0.6
ZFP820	mmu-miR-181c-5p(1)//mmu-miR-181d-5p(1)	mmu-miR-181c(6)//mmu-miR-181d(7)	mmu-miR-181c-5p(1)//mmu-miR-181d-5p(1)	mmu-miR-181c(2)//mmu-miR-181d(2)			0.6	NA	NA	NA	NA	0	0.6
ZFP937	mmu-miR-181c-5p(1)//mmu-miR-181d-5p(1)		mmu-miR-181c-5p(1)//mmu-miR-181d-5p(1)		miR-181d-5p(1)	miR-181c-5p(1)//miR-181d-5p(1)	0.6	NA	NA	NA	NA	0	0.6
ZSCAN12	mmu-miR-181c-5p(1)//mmu-miR-181d-5p(1)	mmu-miR-181c(1)//mmu-miR-181d(1)	mmu-miR-181c-5p(1)//mmu-miR-181d-5p(1)	mmu-miR-181c(1)//mmu-miR-181d(1)			0.6	NA	NA	NA	NA	0	0.6
ANKFY1	mmu-miR-181c-5p(1)//mmu-miR-181d-5p(1)	mmu-miR-181d(1)	mmu-miR-181c-5p(1)//mmu-miR-181d-5p(1)			miR-181c-5p(1)//miR-181d-5p(1)	0.575	NA	NA	NA	NA	0	0.575
ATP8B1	mmu-miR-181c-5p(1)//mmu-miR-181d-5p(1)	mmu-miR-181d(1)	mmu-miR-181c-5p(1)//mmu-miR-181d-5p(1)			miR-181c-5p(1)//miR-181d-5p(1)	0.575	NA	NA	NA	NA	0	0.575
CAPRIN1		mmu-miR-181c(2)//mmu-miR-181d(2)	mmu-miR-181d-5p(1)	mmu-miR-181c(2)//mmu-miR-181d(2)		miR-181c-5p(1)//miR-181d-5p(1)	0.575	NA	NA	NA	NA	0	0.575
CDK18	mmu-miR-181c-5p(1)//mmu-miR-181d-5p(1)	mmu-miR-181d(1)	mmu-miR-181c-5p(1)//mmu-miR-181d-5p(1)			miR-181c-5p(1)//miR-181d-5p(1)	0.575	NA	NA	NA	NA	0	0.575
FAM19A2	mmu-miR-181c-5p(1)//mmu-miR-181d-5p(1)	mmu-miR-181c(2)	mmu-miR-181c-5p(1)//mmu-miR-181d-5p(1)			miR-181c-5p(1)//miR-181d-5p(1)	0.575	NA	NA	NA	NA	0	0.575
FGD4	mmu-miR-181c-5p(2)//mmu-miR-181d-5p(2)	mmu-miR-181d(1)	mmu-miR-181c-5p(1)//mmu-miR-181d-5p(1)			miR-181c-5p(1)//miR-181d-5p(1)	0.575	NA	NA	NA	NA	0	0.575
GDPD1	mmu-miR-181c-5p(1)//mmu-miR-181d-5p(1)	mmu-miR-181d(1)	mmu-miR-181c-5p(1)//mmu-miR-181d-5p(1)			miR-181c-5p(1)//miR-181d-5p(1)	0.575	NA	NA	NA	NA	0	0.575
GMPS	mmu-miR-181c-5p(1)//mmu-miR-181d-5p(1)	mmu-miR-181d(1)	mmu-miR-181c-5p(1)//mmu-miR-181d-5p(1)			miR-181c-5p(1)//miR-181d-5p(1)	0.575	NA	NA	NA	NA	0	0.575
GREM1	mmu-miR-181c-5p(1)//mmu-miR-181d-5p(1)	mmu-miR-181d(1)	mmu-miR-181c-5p(1)//mmu-miR-181d-5p(1)			miR-181c-5p(1)//miR-181d-5p(1)	0.575	NA	NA	NA	NA	0	0.575
HMGB1	mmu-miR-181c-5p(1)//mmu-miR-181d-5p(1)	mmu-miR-181d(1)	mmu-miR-181c-5p(1)//mmu-miR-181d-5p(1)			miR-181c-5p(1)//miR-181d-5p(1)	0.575	NA	NA	NA	NA	0	0.575
KIFC3		mmu-miR-181c(1)//mmu-miR-181d(1)	mmu-miR-181c-5p(1)//mmu-miR-181d-5p(1)	mmu-miR-181d(1)		miR-181c-5p(1)//miR-181d-5p(1)	0.575	NA	NA	NA	NA	0	0.575
MAEA	mmu-miR-181c-5p(1)//mmu-miR-181d-5p(1)	mmu-miR-181d(1)	mmu-miR-181c-5p(1)//mmu-miR-181d-5p(1)			miR-181c-5p(1)//miR-181d-5p(1)	0.575	NA	NA	NA	NA	0	0.575
MOSPD2	mmu-miR-181c-5p(1)//mmu-miR-181d-5p(1)	mmu-miR-181c(3)//mmu-miR-181d(3)	mmu-miR-181d-5p(1)			miR-181c-5p(1)//miR-181d-5p(1)	0.575	NA	NA	NA	NA	0	0.575
NAA15	mmu-miR-181c-5p(1)//mmu-miR-181d-5p(1)	mmu-miR-181d(1)	mmu-miR-181c-5p(1)//mmu-miR-181d-5p(1)			miR-181c-5p(1)//miR-181d-5p(1)	0.575	NA	NA	NA	NA	0	0.575
PLCB1	mmu-miR-181c-5p(1)//mmu-miR-181d-5p(1)	mmu-miR-181d(1)	mmu-miR-181c-5p(1)//mmu-miR-181d-5p(1)			miR-181c-5p(1)//miR-181d-5p(1)	0.575	NA	NA	NA	NA	0	0.575
RAB6B	mmu-miR-181c-5p(1)//mmu-miR-181d-5p(1)	mmu-miR-181c(1)//mmu-miR-181d(1)	mmu-miR-181d-5p(1)			miR-181c-5p(1)//miR-181d-5p(1)	0.575	NA	NA	NA	NA	0	0.575
RBM47	mmu-miR-181c-5p(2)//mmu-miR-181d-5p(2)	mmu-miR-181d(1)	mmu-miR-181c-5p(1)//mmu-miR-181d-5p(1)			miR-181c-5p(1)//miR-181d-5p(1)	0.575	NA	NA	NA	NA	0	0.575
RNF44		mmu-miR-181c(1)//mmu-miR-181d(1)	mmu-miR-181d-5p(1)	mmu-miR-181c(1)//mmu-miR-181d(1)		miR-181c-5p(1)//miR-181d-5p(1)	0.575	NA	NA	NA	NA	0	0.575
S1PR3	mmu-miR-181c-5p(1)//mmu-miR-181d-5p(1)	mmu-miR-181c(1)//mmu-miR-181d(1)	mmu-miR-181d-5p(1)			miR-181c-5p(1)//miR-181d-5p(1)	0.575	NA	NA	NA	NA	0	0.575
SOX11	mmu-miR-181c-5p(1)//mmu-miR-181d-5p(1)	mmu-miR-181c(1)//mmu-miR-181d(1)		mmu-miR-181d(1)		miR-181c-5p(1)//miR-181d-5p(1)	0.575	NA	NA	NA	NA	0	0.575
SRGAP1	mmu-miR-181c-5p(1)//mmu-miR-181d-5p(1)	mmu-miR-181c(1)//mmu-miR-181d(1)	mmu-miR-181d-5p(1)			miR-181c-5p(1)//miR-181d-5p(1)	0.575	NA	NA	NA	NA	0	0.575
SYN2		mmu-miR-181c(1)//mmu-miR-181d(1)	mmu-miR-181c-5p(1)	mmu-miR-181c(1)//mmu-miR-181d(1)		miR-181c-5p(1)//miR-181d-5p(1)	0.575	NA	NA	NA	NA	0	0.575
TNS1	mmu-miR-181c-5p(1)//mmu-miR-181d-5p(1)	mmu-miR-181d(1)	mmu-miR-181c-5p(1)//mmu-miR-181d-5p(1)			miR-181c-5p(1)//miR-181d-5p(1)	0.575	NA	NA	NA	NA	0	0.575
UBQLN1		mmu-miR-181c(1)//mmu-miR-181d(2)	mmu-miR-181c-5p(1)	mmu-miR-181c(1)//mmu-miR-181d(1)		miR-181c-5p(1)//miR-181d-5p(1)	0.575	NA	NA	NA	NA	0	0.575
UNC5B		mmu-miR-181c(1)//mmu-miR-181d(1)	mmu-miR-181c-5p(1)	mmu-miR-181c(1)//mmu-miR-181d(1)		miR-181c-5p(1)//miR-181d-5p(1)	0.575	NA	NA	NA	NA	0	0.575
WNT9A	mmu-miR-181c-5p(1)//mmu-miR-181d-5p(1)	mmu-miR-181d(1)	mmu-miR-181c-5p(1)//mmu-miR-181d-5p(1)			miR-181c-5p(1)//miR-181d-5p(1)	0.575	NA	NA	NA	NA	0	0.575
ABHD13			mmu-miR-181c-5p(1)//mmu-miR-181d-5p(1)		miR-181c-5p(1)//miR-181d-5p(1)	miR-181c-5p(1)//miR-181d-5p(1)	0.55	NA	NA	NA	NA	0	0.55
AGO2	mmu-miR-181c-5p(2)//mmu-miR-181d-5p(2)				miR-181c-5p(1)//miR-181d-5p(1)	miR-181c-5p(1)//miR-181d-5p(1)	0.55	NA	NA	NA	NA	0	0.55
ALKBH5			mmu-miR-181c-5p(1)//mmu-miR-181d-5p(1)		miR-181c-5p(1)//miR-181d-5p(1)	miR-181c-5p(1)//miR-181d-5p(1)	0.55	NA	NA	NA	NA	0	0.55
ARHGAP18			mmu-miR-181c-5p(1)//mmu-miR-181d-5p(1)		miR-181c-5p(1)//miR-181d-5p(1)	miR-181c-5p(1)//miR-181d-5p(1)	0.55	NA	NA	NA	NA	0	0.55
ARL5B			mmu-miR-181c-5p(1)//mmu-miR-181d-5p(1)		miR-181c-5p(1)//miR-181d-5p(1)	miR-181c-5p(1)//miR-181d-5p(1)	0.55	NA	NA	NA	NA	0	0.55
ARL8B			mmu-miR-181c-5p(1)//mmu-miR-181d-5p(1)		miR-181c-5p(1)//miR-181d-5p(1)	miR-181c-5p(1)//miR-181d-5p(1)	0.55	NA	NA	NA	NA	0	0.55
ATG12			mmu-miR-181c-5p(1)//mmu-miR-181d-5p(1)		miR-181c-5p(1)//miR-181d-5p(1)	miR-181c-5p(1)//miR-181d-5p(1)	0.55	NA	NA	NA	NA	0	0.55
AZIN1			mmu-miR-181c-5p(1)//mmu-miR-181d-5p(1)		miR-181c-5p(1)//miR-181d-5p(1)	miR-181c-5p(1)//miR-181d-5p(1)	0.55	NA	NA	NA	NA	0	0.55
B4GALT5		mmu-miR-181c(1)//mmu-miR-181d(1)			miR-181c-5p(1)//miR-181d-5p(1)	miR-181c-5p(1)//miR-181d-5p(1)	0.55	NA	NA	NA	NA	0	0.55
BARD1			mmu-miR-181c-5p(1)//mmu-miR-181d-5p(1)		miR-181c-5p(1)//miR-181d-5p(1)	miR-181c-5p(1)//miR-181d-5p(1)	0.55	NA	NA	NA	NA	0	0.55
BCL2L2			mmu-miR-181c-5p(1)//mmu-miR-181d-5p(1)		miR-181c-5p(1)//miR-181d-5p(1)	miR-181c-5p(1)//miR-181d-5p(1)	0.55	NA	NA	NA	NA	0	0.55
BUB3		mmu-miR-181c(1)//mmu-miR-181d(1)			miR-181c-5p(1)//miR-181d-5p(1)	miR-181c-5p(1)//miR-181d-5p(1)	0.55	NA	NA	NA	NA	0	0.55
C2CD5	mmu-miR-181c-5p(1)//mmu-miR-181d-5p(1)				miR-181c-5p(1)//miR-181d-5p(1)	miR-181c-5p(1)//miR-181d-5p(1)	0.55	NA	NA	NA	NA	0	0.55
CACNB4			mmu-miR-181c-5p(1)//mmu-miR-181d-5p(1)		miR-181c-5p(1)//miR-181d-5p(1)	miR-181c-5p(1)//miR-181d-5p(1)	0.55	NA	NA	NA	NA	0	0.55
CALM2		mmu-miR-181c(1)//mmu-miR-181d(2)			miR-181c-5p(1)//miR-181d-5p(1)	miR-181c-5p(1)//miR-181d-5p(1)	0.55	NA	NA	NA	NA	0	0.55
CAMK2N1			mmu-miR-181c-5p(1)//mmu-miR-181d-5p(1)		miR-181c-5p(1)//miR-181d-5p(1)	miR-181c-5p(1)//miR-181d-5p(1)	0.55	NA	NA	NA	NA	0	0.55
CAPN10		mmu-miR-181c(2)//mmu-miR-181d(2)			miR-181c-5p(1)//miR-181d-5p(1)	miR-181c-5p(1)//miR-181d-5p(1)	0.55	NA	NA	NA	NA	0	0.55
CDC42SE2			mmu-miR-181c-5p(1)//mmu-miR-181d-5p(1)		miR-181c-5p(1)//miR-181d-5p(1)	miR-181c-5p(1)//miR-181d-5p(1)	0.55	NA	NA	NA	NA	0	0.55
CHD2			mmu-miR-181c-5p(1)//mmu-miR-181d-5p(1)		miR-181c-5p(1)//miR-181d-5p(1)	miR-181c-5p(1)//miR-181d-5p(1)	0.55	NA	NA	NA	NA	0	0.55
CLSTN1			mmu-miR-181c-5p(1)//mmu-miR-181d-5p(1)		miR-181c-5p(1)//miR-181d-5p(1)	miR-181c-5p(1)//miR-181d-5p(1)	0.55	NA	NA	NA	NA	0	0.55
CRK			mmu-miR-181c-5p(1)//mmu-miR-181d-5p(1)		miR-181c-5p(1)//miR-181d-5p(1)	miR-181c-5p(1)//miR-181d-5p(1)	0.55	NA	NA	NA	NA	0	0.55
CRKL			mmu-miR-181c-5p(1)//mmu-miR-181d-5p(1)		miR-181c-5p(1)//miR-181d-5p(1)	miR-181c-5p(1)//miR-181d-5p(1)	0.55	NA	NA	NA	NA	0	0.55
CTDSPL2		mmu-miR-181c(1)//mmu-miR-181d(2)	mmu-miR-181c-5p(1)//mmu-miR-181d-5p(1)	mmu-miR-181c(1)//mmu-miR-181d(1)	miR-181d-5p(1)		0.55	NA	NA	NA	NA	0	0.55
CTSC		mmu-miR-181d(1)	mmu-miR-181c-5p(1)		miR-181c-5p(1)//miR-181d-5p(1)	miR-181c-5p(1)//miR-181d-5p(1)	0.55	NA	NA	NA	NA	0	0.55
DCAF17			mmu-miR-181c-5p(1)//mmu-miR-181d-5p(1)		miR-181c-5p(1)//miR-181d-5p(1)	miR-181c-5p(1)//miR-181d-5p(1)	0.55	NA	NA	NA	NA	0	0.55
DCAF6			mmu-miR-181c-5p(1)//mmu-miR-181d-5p(1)		miR-181c-5p(1)//miR-181d-5p(1)	miR-181c-5p(1)//miR-181d-5p(1)	0.55	NA	NA	NA	NA	0	0.55
DCAF7			mmu-miR-181c-5p(1)//mmu-miR-181d-5p(1)		miR-181c-5p(1)//miR-181d-5p(1)	miR-181c-5p(1)//miR-181d-5p(1)	0.55	NA	NA	NA	NA	0	0.55
DDX21			mmu-miR-181c-5p(1)//mmu-miR-181d-5p(1)		miR-181c-5p(1)//miR-181d-5p(1)	miR-181c-5p(1)//miR-181d-5p(1)	0.55	NA	NA	NA	NA	0	0.55
DDX5			mmu-miR-181c-5p(1)//mmu-miR-181d-5p(1)		miR-181c-5p(1)//miR-181d-5p(1)	miR-181c-5p(1)//miR-181d-5p(1)	0.55	NA	NA	NA	NA	0	0.55
DERL2		mmu-miR-181d(1)	mmu-miR-181c-5p(1)		miR-181c-5p(1)//miR-181d-5p(1)	miR-181c-5p(1)//miR-181d-5p(1)	0.55	NA	NA	NA	NA	0	0.55
DKC1		mmu-miR-181c(1)//mmu-miR-181d(1)			miR-181c-5p(1)//miR-181d-5p(1)	miR-181c-5p(1)//miR-181d-5p(1)	0.55	NA	NA	NA	NA	0	0.55
DYRK2	mmu-miR-181c-5p(1)//mmu-miR-181d-5p(1)				miR-181c-5p(1)//miR-181d-5p(1)	miR-181c-5p(1)//miR-181d-5p(1)	0.55	NA	NA	NA	NA	0	0.55
ELF2			mmu-miR-181c-5p(1)//mmu-miR-181d-5p(1)		miR-181c-5p(1)//miR-181d-5p(1)	miR-181c-5p(1)//miR-181d-5p(1)	0.55	NA	NA	NA	NA	0	0.55
ELMSAN1	mmu-miR-181c-5p(1)//mmu-miR-181d-5p(1)				miR-181c-5p(1)//miR-181d-5p(1)	miR-181c-5p(1)//miR-181d-5p(1)	0.55	NA	NA	NA	NA	0	0.55
FBXO34			mmu-miR-181c-5p(1)//mmu-miR-181d-5p(1)		miR-181c-5p(1)//miR-181d-5p(1)	miR-181c-5p(1)//miR-181d-5p(1)	0.55	NA	NA	NA	NA	0	0.55
FBXO45			mmu-miR-181c-5p(1)//mmu-miR-181d-5p(1)		miR-181c-5p(1)//miR-181d-5p(1)	miR-181c-5p(1)//miR-181d-5p(1)	0.55	NA	NA	NA	NA	0	0.55
FOXK2			mmu-miR-181c-5p(1)//mmu-miR-181d-5p(1)		miR-181c-5p(1)//miR-181d-5p(1)	miR-181c-5p(1)//miR-181d-5p(1)	0.55	NA	NA	NA	NA	0	0.55
FRS2			mmu-miR-181c-5p(1)//mmu-miR-181d-5p(1)		miR-181c-5p(1)//miR-181d-5p(1)	miR-181c-5p(1)//miR-181d-5p(1)	0.55	NA	NA	NA	NA	0	0.55
GGNBP2			mmu-miR-181c-5p(1)//mmu-miR-181d-5p(1)		miR-181c-5p(1)//miR-181d-5p(1)	miR-181c-5p(1)//miR-181d-5p(1)	0.55	NA	NA	NA	NA	0	0.55
GSKIP	mmu-miR-181c-5p(2)//mmu-miR-181d-5p(2)				miR-181c-5p(1)//miR-181d-5p(1)	miR-181c-5p(1)//miR-181d-5p(1)	0.55	NA	NA	NA	NA	0	0.55
H3F3B		mmu-miR-181d(1)	mmu-miR-181d-5p(1)		miR-181c-5p(1)//miR-181d-5p(1)	miR-181c-5p(1)//miR-181d-5p(1)	0.55	NA	NA	NA	NA	0	0.55
HNRNPH3		mmu-miR-181c(1)//mmu-miR-181d(1)			miR-181c-5p(1)//miR-181d-5p(1)	miR-181c-5p(1)//miR-181d-5p(1)	0.55	NA	NA	NA	NA	0	0.55
HOOK3			mmu-miR-181c-5p(1)//mmu-miR-181d-5p(1)		miR-181c-5p(1)//miR-181d-5p(1)	miR-181c-5p(1)//miR-181d-5p(1)	0.55	NA	NA	NA	NA	0	0.55
IFRD1			mmu-miR-181c-5p(1)//mmu-miR-181d-5p(1)		miR-181c-5p(1)//miR-181d-5p(1)	miR-181c-5p(1)//miR-181d-5p(1)	0.55	NA	NA	NA	NA	0	0.55
IMPAD1		mmu-miR-181c(1)//mmu-miR-181d(1)			miR-181c-5p(1)//miR-181d-5p(1)	miR-181c-5p(1)//miR-181d-5p(1)	0.55	NA	NA	NA	NA	0	0.55
IRS2	mmu-miR-181c-5p(1)//mmu-miR-181d-5p(1)				miR-181c-5p(1)//miR-181d-5p(1)	miR-181c-5p(1)//miR-181d-5p(1)	0.55	NA	NA	NA	NA	0	0.55
ITGB3			mmu-miR-181c-5p(1)//mmu-miR-181d-5p(1)		miR-181c-5p(1)//miR-181d-5p(1)	miR-181c-5p(1)//miR-181d-5p(1)	0.55	NA	NA	NA	NA	0	0.55
KDM5B		mmu-miR-181c(1)//mmu-miR-181d(1)			miR-181c-5p(1)//miR-181d-5p(1)	miR-181c-5p(1)//miR-181d-5p(1)	0.55	NA	NA	NA	NA	0	0.55
KLHDC10			mmu-miR-181c-5p(1)//mmu-miR-181d-5p(1)		miR-181c-5p(1)//miR-181d-5p(1)	miR-181c-5p(1)//miR-181d-5p(1)	0.55	NA	NA	NA	NA	0	0.55
KMT2A	mmu-miR-181c-5p(3)//mmu-miR-181d-5p(3)				miR-181c-5p(1)//miR-181d-5p(1)	miR-181c-5p(1)//miR-181d-5p(1)	0.55	NA	NA	NA	NA	0	0.55
KMT2C	mmu-miR-181c-5p(2)//mmu-miR-181d-5p(2)				miR-181c-5p(1)//miR-181d-5p(1)	miR-181c-5p(1)//miR-181d-5p(1)	0.55	NA	NA	NA	NA	0	0.55
KRAS		mmu-miR-181d(2)	mmu-miR-181d-5p(1)		miR-181c-5p(1)//miR-181d-5p(1)	miR-181c-5p(1)//miR-181d-5p(1)	0.55	NA	NA	NA	NA	0	0.55
LARP4B			mmu-miR-181c-5p(1)//mmu-miR-181d-5p(1)		miR-181c-5p(1)//miR-181d-5p(1)	miR-181c-5p(1)//miR-181d-5p(1)	0.55	NA	NA	NA	NA	0	0.55
LIN54			mmu-miR-181c-5p(1)//mmu-miR-181d-5p(1)		miR-181c-5p(1)//miR-181d-5p(1)	miR-181c-5p(1)//miR-181d-5p(1)	0.55	NA	NA	NA	NA	0	0.55
LRRC58			mmu-miR-181c-5p(1)//mmu-miR-181d-5p(1)		miR-181c-5p(1)//miR-181d-5p(1)	miR-181c-5p(1)//miR-181d-5p(1)	0.55	NA	NA	NA	NA	0	0.55
LRRC8D			mmu-miR-181c-5p(1)//mmu-miR-181d-5p(1)		miR-181c-5p(1)//miR-181d-5p(1)	miR-181c-5p(1)//miR-181d-5p(1)	0.55	NA	NA	NA	NA	0	0.55
MADD		mmu-miR-181c(2)//mmu-miR-181d(2)			miR-181c-5p(1)//miR-181d-5p(1)	miR-181c-5p(1)//miR-181d-5p(1)	0.55	NA	NA	NA	NA	0	0.55
MAP1B	mmu-miR-181c-5p(2)//mmu-miR-181d-5p(2)				miR-181c-5p(1)//miR-181d-5p(1)	miR-181c-5p(1)//miR-181d-5p(1)	0.55	NA	NA	NA	NA	0	0.55
MAP3K2			mmu-miR-181c-5p(1)//mmu-miR-181d-5p(1)		miR-181c-5p(1)//miR-181d-5p(1)	miR-181c-5p(1)//miR-181d-5p(1)	0.55	NA	NA	NA	NA	0	0.55
MCFD2			mmu-miR-181c-5p(1)//mmu-miR-181d-5p(1)		miR-181c-5p(1)//miR-181d-5p(1)	miR-181c-5p(1)//miR-181d-5p(1)	0.55	NA	NA	NA	NA	0	0.55
MDM4	mmu-miR-181c-5p(1)//mmu-miR-181d-5p(1)				miR-181c-5p(1)//miR-181d-5p(1)	miR-181c-5p(1)//miR-181d-5p(1)	0.55	NA	NA	NA	NA	0	0.55
MTMR9	mmu-miR-181c-5p(1)//mmu-miR-181d-5p(1)				miR-181c-5p(1)//miR-181d-5p(1)	miR-181c-5p(1)//miR-181d-5p(1)	0.55	NA	NA	NA	NA	0	0.55
MYO10		mmu-miR-181c(1)//mmu-miR-181d(1)			miR-181c-5p(1)//miR-181d-5p(1)	miR-181c-5p(1)//miR-181d-5p(1)	0.55	NA	NA	NA	NA	0	0.55
NEURL1B			mmu-miR-181c-5p(1)//mmu-miR-181d-5p(1)		miR-181c-5p(1)//miR-181d-5p(1)	miR-181c-5p(1)//miR-181d-5p(1)	0.55	NA	NA	NA	NA	0	0.55
NUDT19			mmu-miR-181c-5p(1)//mmu-miR-181d-5p(1)		miR-181c-5p(1)//miR-181d-5p(1)	miR-181c-5p(1)//miR-181d-5p(1)	0.55	NA	NA	NA	NA	0	0.55
NUP50		mmu-miR-181d(2)	mmu-miR-181d-5p(1)		miR-181c-5p(1)//miR-181d-5p(1)	miR-181c-5p(1)//miR-181d-5p(1)	0.55	NA	NA	NA	NA	0	0.55
OTUD1			mmu-miR-181c-5p(1)//mmu-miR-181d-5p(1)		miR-181c-5p(1)//miR-181d-5p(1)	miR-181c-5p(1)//miR-181d-5p(1)	0.55	NA	NA	NA	NA	0	0.55
OTUD6B		mmu-miR-181c(1)//mmu-miR-181d(1)			miR-181c-5p(1)//miR-181d-5p(1)	miR-181c-5p(1)//miR-181d-5p(1)	0.55	NA	NA	NA	NA	0	0.55
PALB2		mmu-miR-181c(2)//mmu-miR-181d(2)			miR-181c-5p(1)//miR-181d-5p(1)	miR-181c-5p(1)//miR-181d-5p(1)	0.55	NA	NA	NA	NA	0	0.55
PANK3			mmu-miR-181c-5p(1)//mmu-miR-181d-5p(1)		miR-181c-5p(1)//miR-181d-5p(1)	miR-181c-5p(1)//miR-181d-5p(1)	0.55	NA	NA	NA	NA	0	0.55
PELI1			mmu-miR-181c-5p(1)//mmu-miR-181d-5p(1)		miR-181c-5p(1)//miR-181d-5p(1)	miR-181c-5p(1)//miR-181d-5p(1)	0.55	NA	NA	NA	NA	0	0.55
PNISR	mmu-miR-181c-5p(1)//mmu-miR-181d-5p(1)				miR-181c-5p(1)//miR-181d-5p(1)	miR-181c-5p(1)//miR-181d-5p(1)	0.55	NA	NA	NA	NA	0	0.55
PRRC2C	mmu-miR-181c-5p(1)//mmu-miR-181d-5p(1)				miR-181c-5p(1)//miR-181d-5p(1)	miR-181c-5p(1)//miR-181d-5p(1)	0.55	NA	NA	NA	NA	0	0.55
PSD3			mmu-miR-181c-5p(1)//mmu-miR-181d-5p(1)		miR-181c-5p(1)//miR-181d-5p(1)	miR-181c-5p(1)//miR-181d-5p(1)	0.55	NA	NA	NA	NA	0	0.55
PTBP3	mmu-miR-181c-5p(2)//mmu-miR-181d-5p(2)				miR-181c-5p(1)//miR-181d-5p(1)	miR-181c-5p(1)//miR-181d-5p(1)	0.55	NA	NA	NA	NA	0	0.55
RAB14			mmu-miR-181c-5p(1)//mmu-miR-181d-5p(1)		miR-181c-5p(1)//miR-181d-5p(1)	miR-181c-5p(1)//miR-181d-5p(1)	0.55	NA	NA	NA	NA	0	0.55
RBAK			mmu-miR-181c-5p(1)//mmu-miR-181d-5p(1)		miR-181c-5p(1)//miR-181d-5p(1)	miR-181c-5p(1)//miR-181d-5p(1)	0.55	NA	NA	NA	NA	0	0.55
RBMS1			mmu-miR-181c-5p(1)//mmu-miR-181d-5p(1)		miR-181c-5p(1)//miR-181d-5p(1)	miR-181c-5p(1)//miR-181d-5p(1)	0.55	NA	NA	NA	NA	0	0.55
RC3H1			mmu-miR-181c-5p(1)//mmu-miR-181d-5p(1)		miR-181c-5p(1)//miR-181d-5p(1)	miR-181c-5p(1)//miR-181d-5p(1)	0.55	NA	NA	NA	NA	0	0.55
RICTOR		mmu-miR-181c(2)//mmu-miR-181d(2)			miR-181c-5p(1)//miR-181d-5p(1)	miR-181c-5p(1)//miR-181d-5p(1)	0.55	NA	NA	NA	NA	0	0.55
RNF150	mmu-miR-181c-5p(1)//mmu-miR-181d-5p(1)	mmu-miR-181c(3)//mmu-miR-181d(3)	mmu-miR-181c-5p(1)//mmu-miR-181d-5p(1)		miR-181c-5p(1)		0.55	NA	NA	NA	NA	0	0.55
RRM2B			mmu-miR-181c-5p(1)//mmu-miR-181d-5p(1)		miR-181c-5p(1)//miR-181d-5p(1)	miR-181c-5p(1)//miR-181d-5p(1)	0.55	NA	NA	NA	NA	0	0.55
RTN4			mmu-miR-181c-5p(1)//mmu-miR-181d-5p(1)		miR-181c-5p(1)//miR-181d-5p(1)	miR-181c-5p(1)//miR-181d-5p(1)	0.55	NA	NA	NA	NA	0	0.55
SAMD8			mmu-miR-181c-5p(1)//mmu-miR-181d-5p(1)		miR-181c-5p(1)//miR-181d-5p(1)	miR-181c-5p(1)//miR-181d-5p(1)	0.55	NA	NA	NA	NA	0	0.55
SDAD1			mmu-miR-181c-5p(1)//mmu-miR-181d-5p(1)		miR-181c-5p(1)//miR-181d-5p(1)	miR-181c-5p(1)//miR-181d-5p(1)	0.55	NA	NA	NA	NA	0	0.55
SEPT2			mmu-miR-181c-5p(1)//mmu-miR-181d-5p(1)		miR-181c-5p(1)//miR-181d-5p(1)	miR-181c-5p(1)//miR-181d-5p(1)	0.55	NA	NA	NA	NA	0	0.55
SFT2D2			mmu-miR-181c-5p(1)//mmu-miR-181d-5p(1)		miR-181c-5p(1)//miR-181d-5p(1)	miR-181c-5p(1)//miR-181d-5p(1)	0.55	NA	NA	NA	NA	0	0.55
SLA		mmu-miR-181c(1)//mmu-miR-181d(1)			miR-181c-5p(1)//miR-181d-5p(1)	miR-181c-5p(1)//miR-181d-5p(1)	0.55	NA	NA	NA	NA	0	0.55
SLC16A6			mmu-miR-181c-5p(1)//mmu-miR-181d-5p(1)		miR-181c-5p(1)//miR-181d-5p(1)	miR-181c-5p(1)//miR-181d-5p(1)	0.55	NA	NA	NA	NA	0	0.55
SLC38A1		mmu-miR-181c(1)//mmu-miR-181d(1)			miR-181c-5p(1)//miR-181d-5p(1)	miR-181c-5p(1)//miR-181d-5p(1)	0.55	NA	NA	NA	NA	0	0.55
SLC5A3			mmu-miR-181c-5p(1)//mmu-miR-181d-5p(1)		miR-181c-5p(1)//miR-181d-5p(1)	miR-181c-5p(1)//miR-181d-5p(1)	0.55	NA	NA	NA	NA	0	0.55
SLC9A3R1			mmu-miR-181c-5p(1)//mmu-miR-181d-5p(1)		miR-181c-5p(1)//miR-181d-5p(1)	miR-181c-5p(1)//miR-181d-5p(1)	0.55	NA	NA	NA	NA	0	0.55
SLK			mmu-miR-181c-5p(1)//mmu-miR-181d-5p(1)		miR-181c-5p(1)//miR-181d-5p(1)	miR-181c-5p(1)//miR-181d-5p(1)	0.55	NA	NA	NA	NA	0	0.55
SMURF1			mmu-miR-181c-5p(1)//mmu-miR-181d-5p(1)		miR-181c-5p(1)//miR-181d-5p(1)	miR-181c-5p(1)//miR-181d-5p(1)	0.55	NA	NA	NA	NA	0	0.55
SPATA2		mmu-miR-181c(1)//mmu-miR-181d(1)			miR-181c-5p(1)//miR-181d-5p(1)	miR-181c-5p(1)//miR-181d-5p(1)	0.55	NA	NA	NA	NA	0	0.55
SPP1			mmu-miR-181c-5p(1)//mmu-miR-181d-5p(1)		miR-181c-5p(1)//miR-181d-5p(1)	miR-181c-5p(1)//miR-181d-5p(1)	0.55	NA	NA	NA	NA	0	0.55
SRGN			mmu-miR-181c-5p(1)//mmu-miR-181d-5p(1)		miR-181c-5p(1)//miR-181d-5p(1)	miR-181c-5p(1)//miR-181d-5p(1)	0.55	NA	NA	NA	NA	0	0.55
SSBP2		mmu-miR-181c(2)//mmu-miR-181d(3)			miR-181c-5p(1)//miR-181d-5p(1)	miR-181c-5p(1)//miR-181d-5p(1)	0.55	NA	NA	NA	NA	0	0.55
STRN3			mmu-miR-181c-5p(1)//mmu-miR-181d-5p(1)		miR-181c-5p(1)//miR-181d-5p(1)	miR-181c-5p(1)//miR-181d-5p(1)	0.55	NA	NA	NA	NA	0	0.55
STT3B			mmu-miR-181c-5p(1)//mmu-miR-181d-5p(1)		miR-181c-5p(1)//miR-181d-5p(1)	miR-181c-5p(1)//miR-181d-5p(1)	0.55	NA	NA	NA	NA	0	0.55
TEX2			mmu-miR-181c-5p(1)//mmu-miR-181d-5p(1)		miR-181c-5p(1)//miR-181d-5p(1)	miR-181c-5p(1)//miR-181d-5p(1)	0.55	NA	NA	NA	NA	0	0.55
TGOLN1			mmu-miR-181c-5p(1)//mmu-miR-181d-5p(1)		miR-181c-5p(1)//miR-181d-5p(1)	miR-181c-5p(1)//miR-181d-5p(1)	0.55	NA	NA	NA	NA	0	0.55
TNRC6C			mmu-miR-181c-5p(1)//mmu-miR-181d-5p(1)		miR-181c-5p(1)//miR-181d-5p(1)	miR-181c-5p(1)//miR-181d-5p(1)	0.55	NA	NA	NA	NA	0	0.55
TRPM7			mmu-miR-181c-5p(1)//mmu-miR-181d-5p(1)		miR-181c-5p(1)//miR-181d-5p(1)	miR-181c-5p(1)//miR-181d-5p(1)	0.55	NA	NA	NA	NA	0	0.55
TUBB5			mmu-miR-181c-5p(1)//mmu-miR-181d-5p(1)		miR-181c-5p(1)//miR-181d-5p(1)	miR-181c-5p(1)//miR-181d-5p(1)	0.55	NA	NA	NA	NA	0	0.55
UBE2D3	mmu-miR-181c-5p(1)//mmu-miR-181d-5p(1)				miR-181c-5p(1)//miR-181d-5p(1)	miR-181c-5p(1)//miR-181d-5p(1)	0.55	NA	NA	NA	NA	0	0.55
USP9X		mmu-miR-181c(1)//mmu-miR-181d(1)	mmu-miR-181c-5p(1)//mmu-miR-181d-5p(1)	mmu-miR-181c(1)//mmu-miR-181d(1)		miR-181d-5p(1)	0.55	NA	NA	NA	NA	0	0.55
USPL1			mmu-miR-181c-5p(1)//mmu-miR-181d-5p(1)		miR-181c-5p(1)//miR-181d-5p(1)	miR-181c-5p(1)//miR-181d-5p(1)	0.55	NA	NA	NA	NA	0	0.55
UTY		mmu-miR-181c(1)//mmu-miR-181d(1)	mmu-miR-181c-5p(1)//mmu-miR-181d-5p(1)	mmu-miR-181c(1)//mmu-miR-181d(1)		miR-181c-5p(1)	0.55	NA	NA	NA	NA	0	0.55
VBP1			mmu-miR-181c-5p(1)//mmu-miR-181d-5p(1)		miR-181c-5p(1)//miR-181d-5p(1)	miR-181c-5p(1)//miR-181d-5p(1)	0.55	NA	NA	NA	NA	0	0.55
VMA21			mmu-miR-181c-5p(1)//mmu-miR-181d-5p(1)		miR-181c-5p(1)//miR-181d-5p(1)	miR-181c-5p(1)//miR-181d-5p(1)	0.55	NA	NA	NA	NA	0	0.55
WASF1			mmu-miR-181c-5p(1)//mmu-miR-181d-5p(1)		miR-181c-5p(1)//miR-181d-5p(1)	miR-181c-5p(1)//miR-181d-5p(1)	0.55	NA	NA	NA	NA	0	0.55
XRN1		mmu-miR-181c(1)//mmu-miR-181d(1)			miR-181c-5p(1)//miR-181d-5p(1)	miR-181c-5p(1)//miR-181d-5p(1)	0.55	NA	NA	NA	NA	0	0.55
YWHAB			mmu-miR-181c-5p(1)//mmu-miR-181d-5p(1)		miR-181c-5p(1)//miR-181d-5p(1)	miR-181c-5p(1)//miR-181d-5p(1)	0.55	NA	NA	NA	NA	0	0.55
YY1		mmu-miR-181c(1)//mmu-miR-181d(1)			miR-181c-5p(1)//miR-181d-5p(1)	miR-181c-5p(1)//miR-181d-5p(1)	0.55	NA	NA	NA	NA	0	0.55
ZBTB11		mmu-miR-181c(3)//mmu-miR-181d(3)			miR-181c-5p(1)//miR-181d-5p(1)	miR-181c-5p(1)//miR-181d-5p(1)	0.55	NA	NA	NA	NA	0	0.55
ZC3H12C			mmu-miR-181c-5p(1)//mmu-miR-181d-5p(1)		miR-181c-5p(1)//miR-181d-5p(1)	miR-181c-5p(1)//miR-181d-5p(1)	0.55	NA	NA	NA	NA	0	0.55
ZFAND1	mmu-miR-181c-5p(1)//mmu-miR-181d-5p(1)	mmu-miR-181c(2)//mmu-miR-181d(2)	mmu-miR-181c-5p(1)//mmu-miR-181d-5p(1)		miR-181c-5p(1)		0.55	NA	NA	NA	NA	0	0.55
ZFP26			mmu-miR-181c-5p(1)//mmu-miR-181d-5p(1)		miR-181c-5p(1)//miR-181d-5p(1)	miR-181c-5p(1)//miR-181d-5p(1)	0.55	NA	NA	NA	NA	0	0.55
ZFP367			mmu-miR-181c-5p(1)//mmu-miR-181d-5p(1)		miR-181c-5p(1)//miR-181d-5p(1)	miR-181c-5p(1)//miR-181d-5p(1)	0.55	NA	NA	NA	NA	0	0.55
ZFP758			mmu-miR-181c-5p(1)//mmu-miR-181d-5p(1)		miR-181c-5p(1)//miR-181d-5p(1)	miR-181c-5p(1)//miR-181d-5p(1)	0.55	NA	NA	NA	NA	0	0.55
ZFP871			mmu-miR-181c-5p(1)//mmu-miR-181d-5p(1)		miR-181c-5p(1)//miR-181d-5p(1)	miR-181c-5p(1)//miR-181d-5p(1)	0.55	NA	NA	NA	NA	0	0.55
ZFP961			mmu-miR-181c-5p(1)//mmu-miR-181d-5p(1)		miR-181c-5p(1)//miR-181d-5p(1)	miR-181c-5p(1)//miR-181d-5p(1)	0.55	NA	NA	NA	NA	0	0.55
ZIC5			mmu-miR-181c-5p(1)//mmu-miR-181d-5p(1)		miR-181c-5p(1)//miR-181d-5p(1)	miR-181c-5p(1)//miR-181d-5p(1)	0.55	NA	NA	NA	NA	0	0.55
ZKSCAN3		mmu-miR-181c(1)//mmu-miR-181d(1)			miR-181c-5p(1)//miR-181d-5p(1)	miR-181c-5p(1)//miR-181d-5p(1)	0.55	NA	NA	NA	NA	0	0.55
ZMYM1		mmu-miR-181c(1)//mmu-miR-181d(1)			miR-181c-5p(1)//miR-181d-5p(1)	miR-181c-5p(1)//miR-181d-5p(1)	0.55	NA	NA	NA	NA	0	0.55
ZMYM2			mmu-miR-181c-5p(1)//mmu-miR-181d-5p(1)		miR-181c-5p(1)//miR-181d-5p(1)	miR-181c-5p(1)//miR-181d-5p(1)	0.55	NA	NA	NA	NA	0	0.55
ZMYND8			mmu-miR-181c-5p(1)//mmu-miR-181d-5p(1)		miR-181c-5p(1)//miR-181d-5p(1)	miR-181c-5p(1)//miR-181d-5p(1)	0.55	NA	NA	NA	NA	0	0.55
ADAMTSL1	mmu-miR-181c-5p(1)//mmu-miR-181d-5p(1)	mmu-miR-181d(1)	mmu-miR-181c-5p(1)//mmu-miR-181d-5p(1)	mmu-miR-181c(1)//mmu-miR-181d(1)			0.525	NA	NA	NA	NA	0	0.525
AKAP12		mmu-miR-181d(1)	mmu-miR-181c-5p(1)//mmu-miR-181d-5p(1)		miR-181c-5p(1)	miR-181c-5p(1)//miR-181d-5p(1)	0.525	NA	NA	NA	NA	0	0.525
ANKRD10		mmu-miR-181c(1)//mmu-miR-181d(2)	mmu-miR-181d-5p(1)		miR-181c-5p(1)	miR-181c-5p(1)//miR-181d-5p(1)	0.525	NA	NA	NA	NA	0	0.525
ARHGAP11A		mmu-miR-181d(1)	mmu-miR-181c-5p(1)//mmu-miR-181d-5p(1)		miR-181c-5p(1)//miR-181d-5p(1)	miR-181c-5p(1)	0.525	NA	NA	NA	NA	0	0.525
CLIP1	mmu-miR-181c-5p(2)//mmu-miR-181d-5p(2)		mmu-miR-181d-5p(1)		miR-181c-5p(1)	miR-181c-5p(1)//miR-181d-5p(1)	0.525	NA	NA	NA	NA	0	0.525
DDI2		mmu-miR-181d(1)	mmu-miR-181c-5p(1)//mmu-miR-181d-5p(1)		miR-181c-5p(1)	miR-181c-5p(1)//miR-181d-5p(1)	0.525	NA	NA	NA	NA	0	0.525
ID4		mmu-miR-181d(1)	mmu-miR-181c-5p(1)//mmu-miR-181d-5p(1)		miR-181c-5p(1)	miR-181c-5p(1)//miR-181d-5p(1)	0.525	NA	NA	NA	NA	0	0.525
KITL	mmu-miR-181c-5p(1)//mmu-miR-181d-5p(1)	mmu-miR-181d(2)	mmu-miR-181c-5p(1)//mmu-miR-181d-5p(1)	mmu-miR-181c(1)//mmu-miR-181d(1)			0.525	NA	NA	NA	NA	0	0.525
MIP	mmu-miR-181c-5p(1)//mmu-miR-181d-5p(1)	mmu-miR-181c(1)//mmu-miR-181d(1)	mmu-miR-181c-5p(1)//mmu-miR-181d-5p(1)	mmu-miR-181c(1)			0.525	NA	NA	NA	NA	0	0.525
PCGF3		mmu-miR-181c(1)//mmu-miR-181d(1)	mmu-miR-181d-5p(1)		miR-181c-5p(1)	miR-181c-5p(1)//miR-181d-5p(1)	0.525	NA	NA	NA	NA	0	0.525
PTGS2		mmu-miR-181d(1)	mmu-miR-181c-5p(1)//mmu-miR-181d-5p(1)		miR-181c-5p(1)	miR-181c-5p(1)//miR-181d-5p(1)	0.525	NA	NA	NA	NA	0	0.525
RAB23		mmu-miR-181d(1)	mmu-miR-181c-5p(1)//mmu-miR-181d-5p(1)		miR-181c-5p(1)	miR-181c-5p(1)//miR-181d-5p(1)	0.525	NA	NA	NA	NA	0	0.525
REEP5		mmu-miR-181d(1)	mmu-miR-181c-5p(1)//mmu-miR-181d-5p(1)		miR-181c-5p(1)	miR-181c-5p(1)//miR-181d-5p(1)	0.525	NA	NA	NA	NA	0	0.525
TRIM23		mmu-miR-181d(1)	mmu-miR-181c-5p(1)//mmu-miR-181d-5p(1)		miR-181c-5p(1)	miR-181c-5p(1)//miR-181d-5p(1)	0.525	NA	NA	NA	NA	0	0.525
UBE2H	mmu-miR-181c-5p(1)//mmu-miR-181d-5p(1)	mmu-miR-181c(1)//mmu-miR-181d(1)	mmu-miR-181c-5p(1)	mmu-miR-181c(1)//mmu-miR-181d(1)			0.525	NA	NA	NA	NA	0	0.525
ARHGAP5		mmu-miR-181c(1)//mmu-miR-181d(1)	mmu-miR-181d-5p(1)		miR-181d-5p(1)	miR-181c-5p(1)//miR-181d-5p(1)	0.525	NA	NA	NA	NA	0	0.525
CAPN7		mmu-miR-181c(1)//mmu-miR-181d(2)	mmu-miR-181d-5p(1)		miR-181d-5p(1)	miR-181c-5p(1)//miR-181d-5p(1)	0.525	NA	NA	NA	NA	0	0.525
CCNC		mmu-miR-181c(2)//mmu-miR-181d(4)	mmu-miR-181c-5p(1)		miR-181c-5p(1)	miR-181c-5p(1)//miR-181d-5p(1)	0.525	NA	NA	NA	NA	0	0.525
MATR3		mmu-miR-181c(1)	mmu-miR-181c-5p(1)//mmu-miR-181d-5p(1)		miR-181c-5p(1)	miR-181c-5p(1)//miR-181d-5p(1)	0.525	NA	NA	NA	NA	0	0.525
SMAD5		mmu-miR-181c(1)//mmu-miR-181d(2)	mmu-miR-181c-5p(1)		miR-181c-5p(1)	miR-181c-5p(1)//miR-181d-5p(1)	0.525	NA	NA	NA	NA	0	0.525
SOCS4		mmu-miR-181c(1)	mmu-miR-181c-5p(1)//mmu-miR-181d-5p(1)		miR-181c-5p(1)	miR-181c-5p(1)//miR-181d-5p(1)	0.525	NA	NA	NA	NA	0	0.525
USP24		mmu-miR-181c(1)//mmu-miR-181d(1)	mmu-miR-181c-5p(1)		miR-181c-5p(1)	miR-181c-5p(1)//miR-181d-5p(1)	0.525	NA	NA	NA	NA	0	0.525
ZFP597		mmu-miR-181c(1)	mmu-miR-181c-5p(1)//mmu-miR-181d-5p(1)		miR-181c-5p(1)	miR-181c-5p(1)//miR-181d-5p(1)	0.525	NA	NA	NA	NA	0	0.525
5730409E04RIK		mmu-miR-181c(1)//mmu-miR-181d(1)	mmu-miR-181c-5p(1)//mmu-miR-181d-5p(1)			miR-181c-5p(1)//miR-181d-5p(1)	0.5	NA	NA	NA	NA	0	0.5
5730455P16RIK		mmu-miR-181c(1)//mmu-miR-181d(1)	mmu-miR-181c-5p(1)//mmu-miR-181d-5p(1)			miR-181c-5p(1)//miR-181d-5p(1)	0.5	NA	NA	NA	NA	0	0.5
A530054K11RIK		mmu-miR-181c(1)//mmu-miR-181d(1)	mmu-miR-181c-5p(1)//mmu-miR-181d-5p(1)		miR-181c-5p(1)//miR-181d-5p(1)		0.5	NA	NA	NA	NA	0	0.5
AAK1	mmu-miR-181c-5p(1)//mmu-miR-181d-5p(1)		mmu-miR-181c-5p(1)//mmu-miR-181d-5p(1)			miR-181c-5p(1)//miR-181d-5p(1)	0.5	NA	NA	NA	NA	0	0.5
ABCA5		mmu-miR-181c(2)//mmu-miR-181d(2)	mmu-miR-181c-5p(1)//mmu-miR-181d-5p(1)			miR-181c-5p(1)//miR-181d-5p(1)	0.5	NA	NA	NA	NA	0	0.5
ABCD3		mmu-miR-181c(1)//mmu-miR-181d(1)	mmu-miR-181c-5p(1)//mmu-miR-181d-5p(1)			miR-181c-5p(1)//miR-181d-5p(1)	0.5	NA	NA	NA	NA	0	0.5
ABI2		mmu-miR-181c(1)//mmu-miR-181d(1)	mmu-miR-181c-5p(1)//mmu-miR-181d-5p(1)			miR-181c-5p(1)//miR-181d-5p(1)	0.5	NA	NA	NA	NA	0	0.5
ADAMTS19		mmu-miR-181c(3)//mmu-miR-181d(3)	mmu-miR-181c-5p(1)//mmu-miR-181d-5p(1)			miR-181c-5p(1)//miR-181d-5p(1)	0.5	NA	NA	NA	NA	0	0.5
ADAMTS20		mmu-miR-181c(1)//mmu-miR-181d(1)	mmu-miR-181c-5p(1)//mmu-miR-181d-5p(1)			miR-181c-5p(1)//miR-181d-5p(1)	0.5	NA	NA	NA	NA	0	0.5
ADCY7		mmu-miR-181c(2)//mmu-miR-181d(2)	mmu-miR-181c-5p(1)//mmu-miR-181d-5p(1)			miR-181c-5p(1)//miR-181d-5p(1)	0.5	NA	NA	NA	NA	0	0.5
AI987944		mmu-miR-181c(2)//mmu-miR-181d(1)	mmu-miR-181c-5p(1)//mmu-miR-181d-5p(1)			miR-181c-5p(1)//miR-181d-5p(1)	0.5	NA	NA	NA	NA	0	0.5
AKAP7		mmu-miR-181c(1)//mmu-miR-181d(1)	mmu-miR-181c-5p(1)//mmu-miR-181d-5p(1)			miR-181c-5p(1)//miR-181d-5p(1)	0.5	NA	NA	NA	NA	0	0.5
AKNA		mmu-miR-181c(1)//mmu-miR-181d(1)	mmu-miR-181c-5p(1)//mmu-miR-181d-5p(1)			miR-181c-5p(1)//miR-181d-5p(1)	0.5	NA	NA	NA	NA	0	0.5
AKT2		mmu-miR-181c(1)//mmu-miR-181d(1)	mmu-miR-181c-5p(1)//mmu-miR-181d-5p(1)			miR-181c-5p(1)//miR-181d-5p(1)	0.5	NA	NA	NA	NA	0	0.5
ALDH1A2		mmu-miR-181c(1)//mmu-miR-181d(1)	mmu-miR-181c-5p(1)//mmu-miR-181d-5p(1)			miR-181c-5p(1)//miR-181d-5p(1)	0.5	NA	NA	NA	NA	0	0.5
ALG13		mmu-miR-181c(1)//mmu-miR-181d(3)	mmu-miR-181c-5p(1)//mmu-miR-181d-5p(1)			miR-181c-5p(1)//miR-181d-5p(1)	0.5	NA	NA	NA	NA	0	0.5
ALG2		mmu-miR-181c(1)//mmu-miR-181d(1)	mmu-miR-181c-5p(1)//mmu-miR-181d-5p(1)			miR-181c-5p(1)//miR-181d-5p(1)	0.5	NA	NA	NA	NA	0	0.5
ANK1	mmu-miR-181c-5p(1)//mmu-miR-181d-5p(1)	mmu-miR-181c(2)//mmu-miR-181d(2)				miR-181c-5p(1)//miR-181d-5p(1)	0.5	NA	NA	NA	NA	0	0.5
ANK3		mmu-miR-181c(1)//mmu-miR-181d(1)	mmu-miR-181c-5p(1)//mmu-miR-181d-5p(1)			miR-181c-5p(1)//miR-181d-5p(1)	0.5	NA	NA	NA	NA	0	0.5
ANKLE2		mmu-miR-181c(1)//mmu-miR-181d(1)	mmu-miR-181c-5p(1)//mmu-miR-181d-5p(1)			miR-181c-5p(1)//miR-181d-5p(1)	0.5	NA	NA	NA	NA	0	0.5
ANKMY2		mmu-miR-181c(2)//mmu-miR-181d(2)	mmu-miR-181c-5p(1)//mmu-miR-181d-5p(1)			miR-181c-5p(1)//miR-181d-5p(1)	0.5	NA	NA	NA	NA	0	0.5
ANKRD27		mmu-miR-181c(1)//mmu-miR-181d(1)	mmu-miR-181c-5p(1)//mmu-miR-181d-5p(1)			miR-181c-5p(1)//miR-181d-5p(1)	0.5	NA	NA	NA	NA	0	0.5
ANKRD50	mmu-miR-181c-5p(2)//mmu-miR-181d-5p(2)		mmu-miR-181c-5p(1)//mmu-miR-181d-5p(1)			miR-181c-5p(1)//miR-181d-5p(1)	0.5	NA	NA	NA	NA	0	0.5
ANKS1B		mmu-miR-181c(2)//mmu-miR-181d(2)	mmu-miR-181c-5p(1)//mmu-miR-181d-5p(1)			miR-181c-5p(1)//miR-181d-5p(1)	0.5	NA	NA	NA	NA	0	0.5
ANTXR2		mmu-miR-181c(1)//mmu-miR-181d(1)	mmu-miR-181c-5p(1)//mmu-miR-181d-5p(1)			miR-181c-5p(1)//miR-181d-5p(1)	0.5	NA	NA	NA	NA	0	0.5
AP1AR	mmu-miR-181c-5p(1)//mmu-miR-181d-5p(1)		mmu-miR-181c-5p(1)//mmu-miR-181d-5p(1)			miR-181c-5p(1)//miR-181d-5p(1)	0.5	NA	NA	NA	NA	0	0.5
AP1S2		mmu-miR-181c(3)//mmu-miR-181d(3)	mmu-miR-181c-5p(1)//mmu-miR-181d-5p(1)			miR-181c-5p(1)//miR-181d-5p(1)	0.5	NA	NA	NA	NA	0	0.5
AP2A2		mmu-miR-181c(1)//mmu-miR-181d(1)	mmu-miR-181c-5p(1)//mmu-miR-181d-5p(1)			miR-181c-5p(1)//miR-181d-5p(1)	0.5	NA	NA	NA	NA	0	0.5
AP4E1		mmu-miR-181c(3)//mmu-miR-181d(3)	mmu-miR-181c-5p(1)//mmu-miR-181d-5p(1)			miR-181c-5p(1)//miR-181d-5p(1)	0.5	NA	NA	NA	NA	0	0.5
APH1B	mmu-miR-181c-5p(1)//mmu-miR-181d-5p(1)		mmu-miR-181c-5p(1)//mmu-miR-181d-5p(1)			miR-181c-5p(1)//miR-181d-5p(1)	0.5	NA	NA	NA	NA	0	0.5
APH1C	mmu-miR-181c-5p(1)//mmu-miR-181d-5p(1)		mmu-miR-181c-5p(1)//mmu-miR-181d-5p(1)			miR-181c-5p(1)//miR-181d-5p(1)	0.5	NA	NA	NA	NA	0	0.5
APLP2	mmu-miR-181c-5p(1)//mmu-miR-181d-5p(1)		mmu-miR-181c-5p(1)//mmu-miR-181d-5p(1)			miR-181c-5p(1)//miR-181d-5p(1)	0.5	NA	NA	NA	NA	0	0.5
AQR		mmu-miR-181c(3)//mmu-miR-181d(4)	mmu-miR-181c-5p(1)//mmu-miR-181d-5p(1)			miR-181c-5p(1)//miR-181d-5p(1)	0.5	NA	NA	NA	NA	0	0.5
ARHGAP17		mmu-miR-181c(2)//mmu-miR-181d(1)	mmu-miR-181c-5p(1)//mmu-miR-181d-5p(1)			miR-181c-5p(1)//miR-181d-5p(1)	0.5	NA	NA	NA	NA	0	0.5
ARHGEF3		mmu-miR-181c(2)//mmu-miR-181d(2)	mmu-miR-181c-5p(1)//mmu-miR-181d-5p(1)			miR-181c-5p(1)//miR-181d-5p(1)	0.5	NA	NA	NA	NA	0	0.5
ARID3B	mmu-miR-181c-5p(1)//mmu-miR-181d-5p(1)		mmu-miR-181c-5p(1)//mmu-miR-181d-5p(1)			miR-181c-5p(1)//miR-181d-5p(1)	0.5	NA	NA	NA	NA	0	0.5
ARIH2		mmu-miR-181c(1)//mmu-miR-181d(1)	mmu-miR-181c-5p(1)//mmu-miR-181d-5p(1)			miR-181c-5p(1)//miR-181d-5p(1)	0.5	NA	NA	NA	NA	0	0.5
ASTN1		mmu-miR-181c(1)//mmu-miR-181d(1)	mmu-miR-181c-5p(1)//mmu-miR-181d-5p(1)			miR-181c-5p(1)//miR-181d-5p(1)	0.5	NA	NA	NA	NA	0	0.5
ATF1		mmu-miR-181c(2)//mmu-miR-181d(3)	mmu-miR-181c-5p(1)//mmu-miR-181d-5p(1)			miR-181c-5p(1)//miR-181d-5p(1)	0.5	NA	NA	NA	NA	0	0.5
ATL2		mmu-miR-181c(5)//mmu-miR-181d(5)	mmu-miR-181c-5p(1)//mmu-miR-181d-5p(1)			miR-181c-5p(1)//miR-181d-5p(1)	0.5	NA	NA	NA	NA	0	0.5
ATMIN		mmu-miR-181c(1)//mmu-miR-181d(1)	mmu-miR-181c-5p(1)//mmu-miR-181d-5p(1)			miR-181c-5p(1)//miR-181d-5p(1)	0.5	NA	NA	NA	NA	0	0.5
ATP11B		mmu-miR-181c(1)//mmu-miR-181d(1)	mmu-miR-181c-5p(1)//mmu-miR-181d-5p(1)			miR-181c-5p(1)//miR-181d-5p(1)	0.5	NA	NA	NA	NA	0	0.5
ATP2A2			mmu-miR-181c-5p(1)//mmu-miR-181d-5p(1)	mmu-miR-181c(1)//mmu-miR-181d(1)		miR-181c-5p(1)//miR-181d-5p(1)	0.5	NA	NA	NA	NA	0	0.5
ATRNL1		mmu-miR-181c(1)//mmu-miR-181d(2)	mmu-miR-181c-5p(1)//mmu-miR-181d-5p(1)			miR-181c-5p(1)//miR-181d-5p(1)	0.5	NA	NA	NA	NA	0	0.5
ATXN7			mmu-miR-181c-5p(1)//mmu-miR-181d-5p(1)	mmu-miR-181c(1)//mmu-miR-181d(1)		miR-181c-5p(1)//miR-181d-5p(1)	0.5	NA	NA	NA	NA	0	0.5
AURKB		mmu-miR-181c(1)//mmu-miR-181d(1)	mmu-miR-181c-5p(1)//mmu-miR-181d-5p(1)			miR-181c-5p(1)//miR-181d-5p(1)	0.5	NA	NA	NA	NA	0	0.5
B3GALT5		mmu-miR-181c(1)//mmu-miR-181d(1)	mmu-miR-181c-5p(1)//mmu-miR-181d-5p(1)			miR-181c-5p(1)//miR-181d-5p(1)	0.5	NA	NA	NA	NA	0	0.5
BCL11A		mmu-miR-181c(1)//mmu-miR-181d(1)	mmu-miR-181c-5p(1)//mmu-miR-181d-5p(1)			miR-181c-5p(1)//miR-181d-5p(1)	0.5	NA	NA	NA	NA	0	0.5
BRAP		mmu-miR-181c(1)//mmu-miR-181d(1)	mmu-miR-181c-5p(1)//mmu-miR-181d-5p(1)			miR-181c-5p(1)//miR-181d-5p(1)	0.5	NA	NA	NA	NA	0	0.5
BRCC3		mmu-miR-181c(3)//mmu-miR-181d(2)	mmu-miR-181c-5p(1)//mmu-miR-181d-5p(1)			miR-181c-5p(1)//miR-181d-5p(1)	0.5	NA	NA	NA	NA	0	0.5
BRD8		mmu-miR-181c(1)//mmu-miR-181d(3)	mmu-miR-181c-5p(1)//mmu-miR-181d-5p(1)		miR-181c-5p(1)//miR-181d-5p(1)		0.5	NA	NA	NA	NA	0	0.5
C330018D20RIK		mmu-miR-181c(1)//mmu-miR-181d(1)	mmu-miR-181c-5p(1)//mmu-miR-181d-5p(1)			miR-181c-5p(1)//miR-181d-5p(1)	0.5	NA	NA	NA	NA	0	0.5
CAB39L		mmu-miR-181c(1)//mmu-miR-181d(1)	mmu-miR-181c-5p(1)//mmu-miR-181d-5p(1)			miR-181c-5p(1)//miR-181d-5p(1)	0.5	NA	NA	NA	NA	0	0.5
CACNA1B	mmu-miR-181c-5p(1)//mmu-miR-181d-5p(1)		mmu-miR-181c-5p(1)//mmu-miR-181d-5p(1)			miR-181c-5p(1)//miR-181d-5p(1)	0.5	NA	NA	NA	NA	0	0.5
CACNB2		mmu-miR-181c(2)//mmu-miR-181d(2)	mmu-miR-181c-5p(1)//mmu-miR-181d-5p(1)			miR-181c-5p(1)//miR-181d-5p(1)	0.5	NA	NA	NA	NA	0	0.5
CADM1		mmu-miR-181c(2)//mmu-miR-181d(2)	mmu-miR-181c-5p(1)//mmu-miR-181d-5p(1)		miR-181c-5p(1)	miR-181d-5p(1)	0.5	NA	NA	NA	NA	0	0.5
CAMSAP2	mmu-miR-181c-5p(1)//mmu-miR-181d-5p(1)		mmu-miR-181c-5p(1)//mmu-miR-181d-5p(1)			miR-181c-5p(1)//miR-181d-5p(1)	0.5	NA	NA	NA	NA	0	0.5
CANT1		mmu-miR-181c(1)//mmu-miR-181d(1)	mmu-miR-181c-5p(1)//mmu-miR-181d-5p(1)			miR-181c-5p(1)//miR-181d-5p(1)	0.5	NA	NA	NA	NA	0	0.5
CAPZA1		mmu-miR-181c(1)//mmu-miR-181d(1)	mmu-miR-181c-5p(1)//mmu-miR-181d-5p(1)			miR-181c-5p(1)//miR-181d-5p(1)	0.5	NA	NA	NA	NA	0	0.5
CASC3		mmu-miR-181c(1)//mmu-miR-181d(1)	mmu-miR-181c-5p(1)//mmu-miR-181d-5p(1)			miR-181c-5p(1)//miR-181d-5p(1)	0.5	NA	NA	NA	NA	0	0.5
CASC4		mmu-miR-181c(3)//mmu-miR-181d(2)	mmu-miR-181c-5p(1)//mmu-miR-181d-5p(1)			miR-181c-5p(1)//miR-181d-5p(1)	0.5	NA	NA	NA	NA	0	0.5
CASK		mmu-miR-181c(1)//mmu-miR-181d(1)	mmu-miR-181c-5p(1)//mmu-miR-181d-5p(1)			miR-181c-5p(1)//miR-181d-5p(1)	0.5	NA	NA	NA	NA	0	0.5
CBLL1	mmu-miR-181c-5p(1)//mmu-miR-181d-5p(1)		mmu-miR-181c-5p(1)//mmu-miR-181d-5p(1)			miR-181c-5p(1)//miR-181d-5p(1)	0.5	NA	NA	NA	NA	0	0.5
CBX8	mmu-miR-181c-5p(1)//mmu-miR-181d-5p(1)		mmu-miR-181c-5p(1)//mmu-miR-181d-5p(1)			miR-181c-5p(1)//miR-181d-5p(1)	0.5	NA	NA	NA	NA	0	0.5
CCDC88A		mmu-miR-181c(2)//mmu-miR-181d(4)	mmu-miR-181c-5p(1)//mmu-miR-181d-5p(1)			miR-181c-5p(1)//miR-181d-5p(1)	0.5	NA	NA	NA	NA	0	0.5
CCDC88C	mmu-miR-181c-5p(1)//mmu-miR-181d-5p(1)	mmu-miR-181c(1)//mmu-miR-181d(1)				miR-181c-5p(1)//miR-181d-5p(1)	0.5	NA	NA	NA	NA	0	0.5
CCNF		mmu-miR-181c(2)//mmu-miR-181d(2)	mmu-miR-181c-5p(1)//mmu-miR-181d-5p(1)			miR-181c-5p(1)//miR-181d-5p(1)	0.5	NA	NA	NA	NA	0	0.5
CD24A		mmu-miR-181c(1)//mmu-miR-181d(1)	mmu-miR-181c-5p(1)//mmu-miR-181d-5p(1)			miR-181c-5p(1)//miR-181d-5p(1)	0.5	NA	NA	NA	NA	0	0.5
CD55		mmu-miR-181c(1)//mmu-miR-181d(1)	mmu-miR-181c-5p(1)//mmu-miR-181d-5p(1)			miR-181c-5p(1)//miR-181d-5p(1)	0.5	NA	NA	NA	NA	0	0.5
CD83		mmu-miR-181c(2)//mmu-miR-181d(2)	mmu-miR-181c-5p(1)//mmu-miR-181d-5p(1)			miR-181c-5p(1)//miR-181d-5p(1)	0.5	NA	NA	NA	NA	0	0.5
CDC40		mmu-miR-181c(2)//mmu-miR-181d(2)	mmu-miR-181c-5p(1)//mmu-miR-181d-5p(1)			miR-181c-5p(1)//miR-181d-5p(1)	0.5	NA	NA	NA	NA	0	0.5
CDS2			mmu-miR-181c-5p(1)//mmu-miR-181d-5p(1)	mmu-miR-181c(1)//mmu-miR-181d(1)		miR-181c-5p(1)//miR-181d-5p(1)	0.5	NA	NA	NA	NA	0	0.5
CENPI		mmu-miR-181c(1)//mmu-miR-181d(1)	mmu-miR-181c-5p(1)//mmu-miR-181d-5p(1)			miR-181c-5p(1)//miR-181d-5p(1)	0.5	NA	NA	NA	NA	0	0.5
CFTR		mmu-miR-181c(1)//mmu-miR-181d(1)	mmu-miR-181c-5p(1)//mmu-miR-181d-5p(1)			miR-181c-5p(1)//miR-181d-5p(1)	0.5	NA	NA	NA	NA	0	0.5
CHST2		mmu-miR-181c(2)//mmu-miR-181d(3)	mmu-miR-181c-5p(1)//mmu-miR-181d-5p(1)			miR-181c-5p(1)//miR-181d-5p(1)	0.5	NA	NA	NA	NA	0	0.5
CLEC1A		mmu-miR-181c(1)//mmu-miR-181d(1)	mmu-miR-181c-5p(1)//mmu-miR-181d-5p(1)			miR-181c-5p(1)//miR-181d-5p(1)	0.5	NA	NA	NA	NA	0	0.5
CLIC6		mmu-miR-181c(1)//mmu-miR-181d(1)	mmu-miR-181c-5p(1)//mmu-miR-181d-5p(1)			miR-181c-5p(1)//miR-181d-5p(1)	0.5	NA	NA	NA	NA	0	0.5
CNNM2	mmu-miR-181c-5p(1)//mmu-miR-181d-5p(1)		mmu-miR-181c-5p(1)//mmu-miR-181d-5p(1)			miR-181c-5p(1)//miR-181d-5p(1)	0.5	NA	NA	NA	NA	0	0.5
COL3A1		mmu-miR-181c(1)//mmu-miR-181d(1)	mmu-miR-181c-5p(1)//mmu-miR-181d-5p(1)			miR-181c-5p(1)//miR-181d-5p(1)	0.5	NA	NA	NA	NA	0	0.5
COPS8		mmu-miR-181c(1)//mmu-miR-181d(1)	mmu-miR-181c-5p(1)//mmu-miR-181d-5p(1)			miR-181c-5p(1)//miR-181d-5p(1)	0.5	NA	NA	NA	NA	0	0.5
CPSF4		mmu-miR-181c(1)//mmu-miR-181d(1)	mmu-miR-181c-5p(1)//mmu-miR-181d-5p(1)			miR-181c-5p(1)//miR-181d-5p(1)	0.5	NA	NA	NA	NA	0	0.5
CRY2		mmu-miR-181c(1)//mmu-miR-181d(1)	mmu-miR-181c-5p(1)//mmu-miR-181d-5p(1)			miR-181c-5p(1)//miR-181d-5p(1)	0.5	NA	NA	NA	NA	0	0.5
CTNNA2		mmu-miR-181c(1)//mmu-miR-181d(1)	mmu-miR-181c-5p(1)//mmu-miR-181d-5p(1)			miR-181c-5p(1)//miR-181d-5p(1)	0.5	NA	NA	NA	NA	0	0.5
CTNND1	mmu-miR-181c-5p(2)//mmu-miR-181d-5p(2)		mmu-miR-181c-5p(1)//mmu-miR-181d-5p(1)			miR-181c-5p(1)//miR-181d-5p(1)	0.5	NA	NA	NA	NA	0	0.5
CTNND2		mmu-miR-181c(1)//mmu-miR-181d(1)	mmu-miR-181c-5p(1)//mmu-miR-181d-5p(1)			miR-181c-5p(1)//miR-181d-5p(1)	0.5	NA	NA	NA	NA	0	0.5
CTTNBP2		mmu-miR-181c(3)//mmu-miR-181d(3)	mmu-miR-181c-5p(1)//mmu-miR-181d-5p(1)			miR-181c-5p(1)//miR-181d-5p(1)	0.5	NA	NA	NA	NA	0	0.5
CXCL1		mmu-miR-181c(1)//mmu-miR-181d(1)	mmu-miR-181c-5p(1)//mmu-miR-181d-5p(1)			miR-181c-5p(1)//miR-181d-5p(1)	0.5	NA	NA	NA	NA	0	0.5
CYP1B1		mmu-miR-181c(6)//mmu-miR-181d(6)	mmu-miR-181c-5p(1)//mmu-miR-181d-5p(1)			miR-181c-5p(1)//miR-181d-5p(1)	0.5	NA	NA	NA	NA	0	0.5
CYP46A1		mmu-miR-181c(1)//mmu-miR-181d(1)	mmu-miR-181c-5p(1)//mmu-miR-181d-5p(1)			miR-181c-5p(1)//miR-181d-5p(1)	0.5	NA	NA	NA	NA	0	0.5
D1ERTD622E	mmu-miR-181c-5p(2)//mmu-miR-181d-5p(2)		mmu-miR-181c-5p(1)//mmu-miR-181d-5p(1)			miR-181c-5p(1)//miR-181d-5p(1)	0.5	NA	NA	NA	NA	0	0.5
DAAM1		mmu-miR-181c(1)//mmu-miR-181d(2)	mmu-miR-181c-5p(1)//mmu-miR-181d-5p(1)			miR-181c-5p(1)//miR-181d-5p(1)	0.5	NA	NA	NA	NA	0	0.5
DACH1		mmu-miR-181c(2)//mmu-miR-181d(2)	mmu-miR-181c-5p(1)//mmu-miR-181d-5p(1)			miR-181c-5p(1)//miR-181d-5p(1)	0.5	NA	NA	NA	NA	0	0.5
DCAF10		mmu-miR-181c(2)//mmu-miR-181d(2)	mmu-miR-181c-5p(1)//mmu-miR-181d-5p(1)			miR-181c-5p(1)//miR-181d-5p(1)	0.5	NA	NA	NA	NA	0	0.5
DCBLD2	mmu-miR-181c-5p(2)//mmu-miR-181d-5p(2)		mmu-miR-181c-5p(1)//mmu-miR-181d-5p(1)			miR-181c-5p(1)//miR-181d-5p(1)	0.5	NA	NA	NA	NA	0	0.5
DCX		mmu-miR-181c(1)//mmu-miR-181d(1)	mmu-miR-181c-5p(1)//mmu-miR-181d-5p(1)			miR-181c-5p(1)//miR-181d-5p(1)	0.5	NA	NA	NA	NA	0	0.5
DDR2	mmu-miR-181c-5p(1)//mmu-miR-181d-5p(1)		mmu-miR-181c-5p(1)//mmu-miR-181d-5p(1)			miR-181c-5p(1)//miR-181d-5p(1)	0.5	NA	NA	NA	NA	0	0.5
DENND4C		mmu-miR-181c(2)//mmu-miR-181d(2)	mmu-miR-181c-5p(1)//mmu-miR-181d-5p(1)			miR-181c-5p(1)//miR-181d-5p(1)	0.5	NA	NA	NA	NA	0	0.5
DHX15		mmu-miR-181c(1)//mmu-miR-181d(1)	mmu-miR-181c-5p(1)//mmu-miR-181d-5p(1)		miR-181c-5p(1)//miR-181d-5p(1)		0.5	NA	NA	NA	NA	0	0.5
DICER1		mmu-miR-181c(1)//mmu-miR-181d(1)	mmu-miR-181c-5p(1)//mmu-miR-181d-5p(1)			miR-181c-5p(1)//miR-181d-5p(1)	0.5	NA	NA	NA	NA	0	0.5
DLC1			mmu-miR-181c-5p(1)//mmu-miR-181d-5p(1)	mmu-miR-181c(1)//mmu-miR-181d(1)		miR-181c-5p(1)//miR-181d-5p(1)	0.5	NA	NA	NA	NA	0	0.5
DLGAP1	mmu-miR-181c-5p(1)//mmu-miR-181d-5p(1)		mmu-miR-181c-5p(1)//mmu-miR-181d-5p(1)			miR-181c-5p(1)//miR-181d-5p(1)	0.5	NA	NA	NA	NA	0	0.5
DNAJC16	mmu-miR-181c-5p(1)//mmu-miR-181d-5p(1)		mmu-miR-181c-5p(1)//mmu-miR-181d-5p(1)			miR-181c-5p(1)//miR-181d-5p(1)	0.5	NA	NA	NA	NA	0	0.5
DNM3		mmu-miR-181c(2)//mmu-miR-181d(5)	mmu-miR-181c-5p(1)//mmu-miR-181d-5p(1)			miR-181c-5p(1)//miR-181d-5p(1)	0.5	NA	NA	NA	NA	0	0.5
DOCK2		mmu-miR-181c(1)//mmu-miR-181d(1)	mmu-miR-181c-5p(1)//mmu-miR-181d-5p(1)			miR-181c-5p(1)//miR-181d-5p(1)	0.5	NA	NA	NA	NA	0	0.5
DOPEY1	mmu-miR-181c-5p(1)//mmu-miR-181d-5p(1)	mmu-miR-181c(2)//mmu-miR-181d(2)				miR-181c-5p(1)//miR-181d-5p(1)	0.5	NA	NA	NA	NA	0	0.5
DR1		mmu-miR-181c(1)//mmu-miR-181d(1)	mmu-miR-181c-5p(1)//mmu-miR-181d-5p(1)			miR-181c-5p(1)//miR-181d-5p(1)	0.5	NA	NA	NA	NA	0	0.5
DRAM1		mmu-miR-181c(1)//mmu-miR-181d(1)	mmu-miR-181c-5p(1)//mmu-miR-181d-5p(1)			miR-181c-5p(1)//miR-181d-5p(1)	0.5	NA	NA	NA	NA	0	0.5
DTX4			mmu-miR-181c-5p(1)//mmu-miR-181d-5p(1)	mmu-miR-181c(1)//mmu-miR-181d(1)		miR-181c-5p(1)//miR-181d-5p(1)	0.5	NA	NA	NA	NA	0	0.5
E2F6		mmu-miR-181c(1)//mmu-miR-181d(1)	mmu-miR-181c-5p(1)//mmu-miR-181d-5p(1)			miR-181c-5p(1)//miR-181d-5p(1)	0.5	NA	NA	NA	NA	0	0.5
EGFLAM		mmu-miR-181c(1)//mmu-miR-181d(1)	mmu-miR-181c-5p(1)//mmu-miR-181d-5p(1)			miR-181c-5p(1)//miR-181d-5p(1)	0.5	NA	NA	NA	NA	0	0.5
EGR3	mmu-miR-181c-5p(1)//mmu-miR-181d-5p(1)	mmu-miR-181c(1)//mmu-miR-181d(3)				miR-181c-5p(1)//miR-181d-5p(1)	0.5	NA	NA	NA	NA	0	0.5
EHBP1L1		mmu-miR-181c(1)//mmu-miR-181d(1)	mmu-miR-181c-5p(1)//mmu-miR-181d-5p(1)			miR-181c-5p(1)//miR-181d-5p(1)	0.5	NA	NA	NA	NA	0	0.5
EHD4		mmu-miR-181c(1)//mmu-miR-181d(1)	mmu-miR-181c-5p(1)//mmu-miR-181d-5p(1)			miR-181c-5p(1)//miR-181d-5p(1)	0.5	NA	NA	NA	NA	0	0.5
EIF5A2		mmu-miR-181c(1)//mmu-miR-181d(2)	mmu-miR-181c-5p(1)//mmu-miR-181d-5p(1)			miR-181c-5p(1)//miR-181d-5p(1)	0.5	NA	NA	NA	NA	0	0.5
ELOVL2	mmu-miR-181c-5p(1)//mmu-miR-181d-5p(1)		mmu-miR-181c-5p(1)//mmu-miR-181d-5p(1)			miR-181c-5p(1)//miR-181d-5p(1)	0.5	NA	NA	NA	NA	0	0.5
EPHA5		mmu-miR-181c(2)//mmu-miR-181d(2)	mmu-miR-181c-5p(1)//mmu-miR-181d-5p(1)			miR-181c-5p(1)//miR-181d-5p(1)	0.5	NA	NA	NA	NA	0	0.5
EPS15	mmu-miR-181c-5p(1)//mmu-miR-181d-5p(1)		mmu-miR-181c-5p(1)//mmu-miR-181d-5p(1)			miR-181c-5p(1)//miR-181d-5p(1)	0.5	NA	NA	NA	NA	0	0.5
EPS8		mmu-miR-181c(2)//mmu-miR-181d(2)	mmu-miR-181c-5p(1)//mmu-miR-181d-5p(1)			miR-181c-5p(1)//miR-181d-5p(1)	0.5	NA	NA	NA	NA	0	0.5
EREG		mmu-miR-181c(2)//mmu-miR-181d(2)	mmu-miR-181c-5p(1)//mmu-miR-181d-5p(1)			miR-181c-5p(1)//miR-181d-5p(1)	0.5	NA	NA	NA	NA	0	0.5
ERG	mmu-miR-181c-5p(1)//mmu-miR-181d-5p(1)		mmu-miR-181c-5p(1)//mmu-miR-181d-5p(1)			miR-181c-5p(1)//miR-181d-5p(1)	0.5	NA	NA	NA	NA	0	0.5
ERGIC2		mmu-miR-181c(3)//mmu-miR-181d(3)	mmu-miR-181c-5p(1)//mmu-miR-181d-5p(1)		miR-181c-5p(1)//miR-181d-5p(1)		0.5	NA	NA	NA	NA	0	0.5
EXOC5		mmu-miR-181c(1)//mmu-miR-181d(3)	mmu-miR-181c-5p(1)//mmu-miR-181d-5p(1)			miR-181c-5p(1)//miR-181d-5p(1)	0.5	NA	NA	NA	NA	0	0.5
EYA3	mmu-miR-181c-5p(1)//mmu-miR-181d-5p(1)		mmu-miR-181c-5p(1)//mmu-miR-181d-5p(1)			miR-181c-5p(1)//miR-181d-5p(1)	0.5	NA	NA	NA	NA	0	0.5
EYA4		mmu-miR-181c(1)//mmu-miR-181d(1)	mmu-miR-181c-5p(1)//mmu-miR-181d-5p(1)			miR-181c-5p(1)//miR-181d-5p(1)	0.5	NA	NA	NA	NA	0	0.5
FAM133B		mmu-miR-181c(1)//mmu-miR-181d(2)	mmu-miR-181c-5p(1)//mmu-miR-181d-5p(1)			miR-181c-5p(1)//miR-181d-5p(1)	0.5	NA	NA	NA	NA	0	0.5
FAM160B2		mmu-miR-181c(3)//mmu-miR-181d(3)	mmu-miR-181c-5p(1)//mmu-miR-181d-5p(1)			miR-181c-5p(1)//miR-181d-5p(1)	0.5	NA	NA	NA	NA	0	0.5
FAM189B		mmu-miR-181c(2)//mmu-miR-181d(2)	mmu-miR-181c-5p(1)//mmu-miR-181d-5p(1)			miR-181c-5p(1)//miR-181d-5p(1)	0.5	NA	NA	NA	NA	0	0.5
FAM32A		mmu-miR-181c(2)//mmu-miR-181d(2)	mmu-miR-181c-5p(1)//mmu-miR-181d-5p(1)			miR-181c-5p(1)//miR-181d-5p(1)	0.5	NA	NA	NA	NA	0	0.5
FAM43A		mmu-miR-181c(1)//mmu-miR-181d(1)	mmu-miR-181c-5p(1)//mmu-miR-181d-5p(1)			miR-181c-5p(1)//miR-181d-5p(1)	0.5	NA	NA	NA	NA	0	0.5
FAM46A		mmu-miR-181c(1)//mmu-miR-181d(1)	mmu-miR-181c-5p(1)//mmu-miR-181d-5p(1)			miR-181c-5p(1)//miR-181d-5p(1)	0.5	NA	NA	NA	NA	0	0.5
FAM58B		mmu-miR-181c(1)//mmu-miR-181d(1)	mmu-miR-181c-5p(1)//mmu-miR-181d-5p(1)			miR-181c-5p(1)//miR-181d-5p(1)	0.5	NA	NA	NA	NA	0	0.5
FAT3		mmu-miR-181c(1)//mmu-miR-181d(1)	mmu-miR-181c-5p(1)//mmu-miR-181d-5p(1)			miR-181c-5p(1)//miR-181d-5p(1)	0.5	NA	NA	NA	NA	0	0.5
FCHO2		mmu-miR-181c(2)//mmu-miR-181d(2)	mmu-miR-181c-5p(1)//mmu-miR-181d-5p(1)			miR-181c-5p(1)//miR-181d-5p(1)	0.5	NA	NA	NA	NA	0	0.5
FGF7		mmu-miR-181c(1)//mmu-miR-181d(1)	mmu-miR-181c-5p(1)//mmu-miR-181d-5p(1)			miR-181c-5p(1)//miR-181d-5p(1)	0.5	NA	NA	NA	NA	0	0.5
FHL2		mmu-miR-181c(1)//mmu-miR-181d(1)	mmu-miR-181c-5p(1)//mmu-miR-181d-5p(1)			miR-181c-5p(1)//miR-181d-5p(1)	0.5	NA	NA	NA	NA	0	0.5
FOXG1		mmu-miR-181c(1)//mmu-miR-181d(1)	mmu-miR-181c-5p(1)//mmu-miR-181d-5p(1)			miR-181c-5p(1)//miR-181d-5p(1)	0.5	NA	NA	NA	NA	0	0.5
FOXN2		mmu-miR-181c(1)//mmu-miR-181d(1)	mmu-miR-181c-5p(1)//mmu-miR-181d-5p(1)			miR-181c-5p(1)//miR-181d-5p(1)	0.5	NA	NA	NA	NA	0	0.5
FOXP2		mmu-miR-181c(1)//mmu-miR-181d(2)	mmu-miR-181c-5p(1)//mmu-miR-181d-5p(1)			miR-181c-5p(1)//miR-181d-5p(1)	0.5	NA	NA	NA	NA	0	0.5
FUT4		mmu-miR-181c(1)//mmu-miR-181d(1)	mmu-miR-181c-5p(1)//mmu-miR-181d-5p(1)			miR-181c-5p(1)//miR-181d-5p(1)	0.5	NA	NA	NA	NA	0	0.5
FZD10		mmu-miR-181c(2)//mmu-miR-181d(1)	mmu-miR-181c-5p(1)//mmu-miR-181d-5p(1)			miR-181c-5p(1)//miR-181d-5p(1)	0.5	NA	NA	NA	NA	0	0.5
GABRA6		mmu-miR-181c(1)//mmu-miR-181d(1)	mmu-miR-181c-5p(1)//mmu-miR-181d-5p(1)			miR-181c-5p(1)//miR-181d-5p(1)	0.5	NA	NA	NA	NA	0	0.5
GALNT1		mmu-miR-181c(1)//mmu-miR-181d(1)	mmu-miR-181c-5p(1)//mmu-miR-181d-5p(1)			miR-181c-5p(1)//miR-181d-5p(1)	0.5	NA	NA	NA	NA	0	0.5
GALNT12		mmu-miR-181c(1)//mmu-miR-181d(1)	mmu-miR-181c-5p(1)//mmu-miR-181d-5p(1)			miR-181c-5p(1)//miR-181d-5p(1)	0.5	NA	NA	NA	NA	0	0.5
GALNT4		mmu-miR-181c(1)//mmu-miR-181d(1)	mmu-miR-181c-5p(1)//mmu-miR-181d-5p(1)			miR-181c-5p(1)//miR-181d-5p(1)	0.5	NA	NA	NA	NA	0	0.5
GALNT7		mmu-miR-181c(2)//mmu-miR-181d(2)	mmu-miR-181c-5p(1)//mmu-miR-181d-5p(1)			miR-181c-5p(1)//miR-181d-5p(1)	0.5	NA	NA	NA	NA	0	0.5
GDAP1		mmu-miR-181c(2)//mmu-miR-181d(3)	mmu-miR-181c-5p(1)//mmu-miR-181d-5p(1)			miR-181c-5p(1)//miR-181d-5p(1)	0.5	NA	NA	NA	NA	0	0.5
GGA2		mmu-miR-181c(2)//mmu-miR-181d(2)	mmu-miR-181c-5p(1)//mmu-miR-181d-5p(1)			miR-181c-5p(1)//miR-181d-5p(1)	0.5	NA	NA	NA	NA	0	0.5
GLA		mmu-miR-181c(1)//mmu-miR-181d(2)	mmu-miR-181c-5p(1)//mmu-miR-181d-5p(1)			miR-181c-5p(1)//miR-181d-5p(1)	0.5	NA	NA	NA	NA	0	0.5
GOSR1		mmu-miR-181c(1)//mmu-miR-181d(2)	mmu-miR-181c-5p(1)//mmu-miR-181d-5p(1)			miR-181c-5p(1)//miR-181d-5p(1)	0.5	NA	NA	NA	NA	0	0.5
GPD1L	mmu-miR-181c-5p(1)//mmu-miR-181d-5p(1)		mmu-miR-181c-5p(1)//mmu-miR-181d-5p(1)			miR-181c-5p(1)//miR-181d-5p(1)	0.5	NA	NA	NA	NA	0	0.5
GPM6A	mmu-miR-181c-5p(1)//mmu-miR-181d-5p(1)		mmu-miR-181c-5p(1)//mmu-miR-181d-5p(1)			miR-181c-5p(1)//miR-181d-5p(1)	0.5	NA	NA	NA	NA	0	0.5
GPX8		mmu-miR-181c(1)//mmu-miR-181d(1)	mmu-miR-181c-5p(1)//mmu-miR-181d-5p(1)			miR-181c-5p(1)//miR-181d-5p(1)	0.5	NA	NA	NA	NA	0	0.5
HAUS6		mmu-miR-181c(1)//mmu-miR-181d(1)	mmu-miR-181c-5p(1)//mmu-miR-181d-5p(1)			miR-181c-5p(1)//miR-181d-5p(1)	0.5	NA	NA	NA	NA	0	0.5
HBS1L		mmu-miR-181c(2)//mmu-miR-181d(2)		mmu-miR-181c(1)//mmu-miR-181d(1)		miR-181c-5p(1)//miR-181d-5p(1)	0.5	NA	NA	NA	NA	0	0.5
HDAC9		mmu-miR-181c(3)//mmu-miR-181d(3)	mmu-miR-181c-5p(1)//mmu-miR-181d-5p(1)			miR-181c-5p(1)//miR-181d-5p(1)	0.5	NA	NA	NA	NA	0	0.5
HDLBP		mmu-miR-181c(1)//mmu-miR-181d(1)	mmu-miR-181c-5p(1)//mmu-miR-181d-5p(1)			miR-181c-5p(1)//miR-181d-5p(1)	0.5	NA	NA	NA	NA	0	0.5
HEATR3		mmu-miR-181c(1)//mmu-miR-181d(1)	mmu-miR-181c-5p(1)//mmu-miR-181d-5p(1)			miR-181c-5p(1)//miR-181d-5p(1)	0.5	NA	NA	NA	NA	0	0.5
HERC3		mmu-miR-181c(2)//mmu-miR-181d(4)	mmu-miR-181c-5p(1)//mmu-miR-181d-5p(1)			miR-181c-5p(1)//miR-181d-5p(1)	0.5	NA	NA	NA	NA	0	0.5
HERPUD1		mmu-miR-181c(1)//mmu-miR-181d(1)	mmu-miR-181c-5p(1)//mmu-miR-181d-5p(1)			miR-181c-5p(1)//miR-181d-5p(1)	0.5	NA	NA	NA	NA	0	0.5
HIGD1A		mmu-miR-181c(1)//mmu-miR-181d(1)	mmu-miR-181c-5p(1)//mmu-miR-181d-5p(1)			miR-181c-5p(1)//miR-181d-5p(1)	0.5	NA	NA	NA	NA	0	0.5
HIPK2	mmu-miR-181c-5p(1)//mmu-miR-181d-5p(1)		mmu-miR-181c-5p(1)//mmu-miR-181d-5p(1)			miR-181c-5p(1)//miR-181d-5p(1)	0.5	NA	NA	NA	NA	0	0.5
HMGCS2		mmu-miR-181c(1)//mmu-miR-181d(1)	mmu-miR-181c-5p(1)//mmu-miR-181d-5p(1)			miR-181c-5p(1)//miR-181d-5p(1)	0.5	NA	NA	NA	NA	0	0.5
HMGXB4		mmu-miR-181c(1)//mmu-miR-181d(1)	mmu-miR-181c-5p(1)//mmu-miR-181d-5p(1)			miR-181c-5p(1)//miR-181d-5p(1)	0.5	NA	NA	NA	NA	0	0.5
HNRNPUL2		mmu-miR-181c(1)//mmu-miR-181d(1)	mmu-miR-181c-5p(1)//mmu-miR-181d-5p(1)			miR-181c-5p(1)//miR-181d-5p(1)	0.5	NA	NA	NA	NA	0	0.5
HOXB8	mmu-miR-181c-5p(1)//mmu-miR-181d-5p(1)		mmu-miR-181c-5p(1)//mmu-miR-181d-5p(1)			miR-181c-5p(1)//miR-181d-5p(1)	0.5	NA	NA	NA	NA	0	0.5
HPGD		mmu-miR-181c(1)//mmu-miR-181d(1)	mmu-miR-181c-5p(1)//mmu-miR-181d-5p(1)			miR-181c-5p(1)//miR-181d-5p(1)	0.5	NA	NA	NA	NA	0	0.5
HPRT		mmu-miR-181c(1)//mmu-miR-181d(1)	mmu-miR-181c-5p(1)//mmu-miR-181d-5p(1)			miR-181c-5p(1)//miR-181d-5p(1)	0.5	NA	NA	NA	NA	0	0.5
HPS3		mmu-miR-181c(1)//mmu-miR-181d(1)	mmu-miR-181c-5p(1)//mmu-miR-181d-5p(1)			miR-181c-5p(1)//miR-181d-5p(1)	0.5	NA	NA	NA	NA	0	0.5
HPS5		mmu-miR-181c(1)//mmu-miR-181d(1)	mmu-miR-181c-5p(1)//mmu-miR-181d-5p(1)			miR-181c-5p(1)//miR-181d-5p(1)	0.5	NA	NA	NA	NA	0	0.5
HS6ST2		mmu-miR-181c(4)//mmu-miR-181d(5)	mmu-miR-181c-5p(1)//mmu-miR-181d-5p(1)			miR-181c-5p(1)//miR-181d-5p(1)	0.5	NA	NA	NA	NA	0	0.5
HUWE1		mmu-miR-181c(2)//mmu-miR-181d(3)	mmu-miR-181c-5p(1)//mmu-miR-181d-5p(1)			miR-181c-5p(1)//miR-181d-5p(1)	0.5	NA	NA	NA	NA	0	0.5
IBTK		mmu-miR-181c(1)//mmu-miR-181d(1)	mmu-miR-181c-5p(1)//mmu-miR-181d-5p(1)			miR-181c-5p(1)//miR-181d-5p(1)	0.5	NA	NA	NA	NA	0	0.5
ICAM1		mmu-miR-181c(1)//mmu-miR-181d(1)	mmu-miR-181c-5p(1)//mmu-miR-181d-5p(1)			miR-181c-5p(1)//miR-181d-5p(1)	0.5	NA	NA	NA	NA	0	0.5
ICK		mmu-miR-181c(1)//mmu-miR-181d(1)	mmu-miR-181c-5p(1)//mmu-miR-181d-5p(1)			miR-181c-5p(1)//miR-181d-5p(1)	0.5	NA	NA	NA	NA	0	0.5
IDH1		mmu-miR-181c(1)//mmu-miR-181d(1)	mmu-miR-181c-5p(1)//mmu-miR-181d-5p(1)			miR-181c-5p(1)//miR-181d-5p(1)	0.5	NA	NA	NA	NA	0	0.5
IDS		mmu-miR-181c(2)//mmu-miR-181d(1)	mmu-miR-181c-5p(1)//mmu-miR-181d-5p(1)			miR-181c-5p(1)//miR-181d-5p(1)	0.5	NA	NA	NA	NA	0	0.5
IFI44		mmu-miR-181c(1)//mmu-miR-181d(1)	mmu-miR-181c-5p(1)//mmu-miR-181d-5p(1)			miR-181c-5p(1)//miR-181d-5p(1)	0.5	NA	NA	NA	NA	0	0.5
IFT52		mmu-miR-181c(1)//mmu-miR-181d(1)	mmu-miR-181c-5p(1)//mmu-miR-181d-5p(1)			miR-181c-5p(1)//miR-181d-5p(1)	0.5	NA	NA	NA	NA	0	0.5
IGF1		mmu-miR-181c(4)//mmu-miR-181d(4)	mmu-miR-181c-5p(1)//mmu-miR-181d-5p(1)			miR-181c-5p(1)//miR-181d-5p(1)	0.5	NA	NA	NA	NA	0	0.5
IKZF1		mmu-miR-181c(1)//mmu-miR-181d(1)	mmu-miR-181c-5p(1)//mmu-miR-181d-5p(1)		miR-181c-5p(1)//miR-181d-5p(1)		0.5	NA	NA	NA	NA	0	0.5
IKZF5		mmu-miR-181c(1)//mmu-miR-181d(1)	mmu-miR-181c-5p(1)//mmu-miR-181d-5p(1)			miR-181c-5p(1)//miR-181d-5p(1)	0.5	NA	NA	NA	NA	0	0.5
IL10RB		mmu-miR-181c(1)//mmu-miR-181d(1)	mmu-miR-181c-5p(1)//mmu-miR-181d-5p(1)			miR-181c-5p(1)//miR-181d-5p(1)	0.5	NA	NA	NA	NA	0	0.5
ILF3		mmu-miR-181c(1)//mmu-miR-181d(2)		mmu-miR-181c(1)//mmu-miR-181d(1)		miR-181c-5p(1)//miR-181d-5p(1)	0.5	NA	NA	NA	NA	0	0.5
INTS6		mmu-miR-181c(3)//mmu-miR-181d(4)	mmu-miR-181c-5p(1)//mmu-miR-181d-5p(1)		miR-181c-5p(1)//miR-181d-5p(1)		0.5	NA	NA	NA	NA	0	0.5
INTU		mmu-miR-181c(1)//mmu-miR-181d(1)	mmu-miR-181c-5p(1)//mmu-miR-181d-5p(1)			miR-181c-5p(1)//miR-181d-5p(1)	0.5	NA	NA	NA	NA	0	0.5
IPCEF1		mmu-miR-181c(1)//mmu-miR-181d(1)	mmu-miR-181c-5p(1)//mmu-miR-181d-5p(1)			miR-181c-5p(1)//miR-181d-5p(1)	0.5	NA	NA	NA	NA	0	0.5
ISCA2		mmu-miR-181c(2)//mmu-miR-181d(2)	mmu-miR-181c-5p(1)//mmu-miR-181d-5p(1)			miR-181c-5p(1)//miR-181d-5p(1)	0.5	NA	NA	NA	NA	0	0.5
ISOC1		mmu-miR-181c(1)//mmu-miR-181d(1)	mmu-miR-181c-5p(1)//mmu-miR-181d-5p(1)			miR-181c-5p(1)//miR-181d-5p(1)	0.5	NA	NA	NA	NA	0	0.5
ITGA4			mmu-miR-181c-5p(1)//mmu-miR-181d-5p(1)	mmu-miR-181c(1)//mmu-miR-181d(1)		miR-181c-5p(1)//miR-181d-5p(1)	0.5	NA	NA	NA	NA	0	0.5
ITGAM		mmu-miR-181c(3)//mmu-miR-181d(3)	mmu-miR-181c-5p(1)//mmu-miR-181d-5p(1)			miR-181c-5p(1)//miR-181d-5p(1)	0.5	NA	NA	NA	NA	0	0.5
IVD		mmu-miR-181c(1)//mmu-miR-181d(1)	mmu-miR-181c-5p(1)//mmu-miR-181d-5p(1)			miR-181c-5p(1)//miR-181d-5p(1)	0.5	NA	NA	NA	NA	0	0.5
JAKMIP3		mmu-miR-181c(1)//mmu-miR-181d(1)	mmu-miR-181c-5p(1)//mmu-miR-181d-5p(1)			miR-181c-5p(1)//miR-181d-5p(1)	0.5	NA	NA	NA	NA	0	0.5
JMY		mmu-miR-181c(1)//mmu-miR-181d(1)	mmu-miR-181c-5p(1)//mmu-miR-181d-5p(1)			miR-181c-5p(1)//miR-181d-5p(1)	0.5	NA	NA	NA	NA	0	0.5
JPH1	mmu-miR-181c-5p(1)//mmu-miR-181d-5p(1)		mmu-miR-181c-5p(1)//mmu-miR-181d-5p(1)			miR-181c-5p(1)//miR-181d-5p(1)	0.5	NA	NA	NA	NA	0	0.5
KBTBD11		mmu-miR-181c(1)//mmu-miR-181d(1)	mmu-miR-181c-5p(1)//mmu-miR-181d-5p(1)			miR-181c-5p(1)//miR-181d-5p(1)	0.5	NA	NA	NA	NA	0	0.5
KCTD10	mmu-miR-181c-5p(1)//mmu-miR-181d-5p(1)	mmu-miR-181c(1)//mmu-miR-181d(1)				miR-181c-5p(1)//miR-181d-5p(1)	0.5	NA	NA	NA	NA	0	0.5
KDELC2		mmu-miR-181c(1)//mmu-miR-181d(1)	mmu-miR-181c-5p(1)//mmu-miR-181d-5p(1)			miR-181c-5p(1)//miR-181d-5p(1)	0.5	NA	NA	NA	NA	0	0.5
KLF12		mmu-miR-181c(1)//mmu-miR-181d(1)		mmu-miR-181c(1)//mmu-miR-181d(1)		miR-181c-5p(1)//miR-181d-5p(1)	0.5	NA	NA	NA	NA	0	0.5
KLHL18		mmu-miR-181c(2)//mmu-miR-181d(1)	mmu-miR-181c-5p(1)//mmu-miR-181d-5p(1)			miR-181c-5p(1)//miR-181d-5p(1)	0.5	NA	NA	NA	NA	0	0.5
KLHL8		mmu-miR-181c(2)//mmu-miR-181d(2)	mmu-miR-181c-5p(1)//mmu-miR-181d-5p(1)			miR-181c-5p(1)//miR-181d-5p(1)	0.5	NA	NA	NA	NA	0	0.5
KREMEN1		mmu-miR-181c(1)//mmu-miR-181d(3)	mmu-miR-181c-5p(1)//mmu-miR-181d-5p(1)			miR-181c-5p(1)//miR-181d-5p(1)	0.5	NA	NA	NA	NA	0	0.5
LAP3		mmu-miR-181c(3)//mmu-miR-181d(3)	mmu-miR-181c-5p(1)//mmu-miR-181d-5p(1)			miR-181c-5p(1)//miR-181d-5p(1)	0.5	NA	NA	NA	NA	0	0.5
LASP1		mmu-miR-181c(1)//mmu-miR-181d(1)	mmu-miR-181c-5p(1)//mmu-miR-181d-5p(1)			miR-181c-5p(1)//miR-181d-5p(1)	0.5	NA	NA	NA	NA	0	0.5
LIMD1		mmu-miR-181c(1)//mmu-miR-181d(1)	mmu-miR-181c-5p(1)//mmu-miR-181d-5p(1)			miR-181c-5p(1)//miR-181d-5p(1)	0.5	NA	NA	NA	NA	0	0.5
LONRF2		mmu-miR-181c(1)//mmu-miR-181d(1)	mmu-miR-181c-5p(1)//mmu-miR-181d-5p(1)			miR-181c-5p(1)//miR-181d-5p(1)	0.5	NA	NA	NA	NA	0	0.5
LOX	mmu-miR-181c-5p(1)//mmu-miR-181d-5p(1)		mmu-miR-181c-5p(1)//mmu-miR-181d-5p(1)			miR-181c-5p(1)//miR-181d-5p(1)	0.5	NA	NA	NA	NA	0	0.5
LPCAT2		mmu-miR-181c(1)//mmu-miR-181d(2)	mmu-miR-181c-5p(1)//mmu-miR-181d-5p(1)			miR-181c-5p(1)//miR-181d-5p(1)	0.5	NA	NA	NA	NA	0	0.5
LRP11		mmu-miR-181c(2)//mmu-miR-181d(1)	mmu-miR-181c-5p(1)//mmu-miR-181d-5p(1)			miR-181c-5p(1)//miR-181d-5p(1)	0.5	NA	NA	NA	NA	0	0.5
LRRC57		mmu-miR-181c(1)//mmu-miR-181d(1)	mmu-miR-181c-5p(1)//mmu-miR-181d-5p(1)			miR-181c-5p(1)//miR-181d-5p(1)	0.5	NA	NA	NA	NA	0	0.5
LRRFIP1		mmu-miR-181c(2)//mmu-miR-181d(2)	mmu-miR-181c-5p(1)//mmu-miR-181d-5p(1)			miR-181c-5p(1)//miR-181d-5p(1)	0.5	NA	NA	NA	NA	0	0.5
LY6A		mmu-miR-181c(1)//mmu-miR-181d(1)	mmu-miR-181c-5p(1)//mmu-miR-181d-5p(1)			miR-181c-5p(1)//miR-181d-5p(1)	0.5	NA	NA	NA	NA	0	0.5
LYSMD4		mmu-miR-181c(2)//mmu-miR-181d(2)	mmu-miR-181c-5p(1)//mmu-miR-181d-5p(1)			miR-181c-5p(1)//miR-181d-5p(1)	0.5	NA	NA	NA	NA	0	0.5
MAGOHB		mmu-miR-181c(1)//mmu-miR-181d(1)		mmu-miR-181c(1)//mmu-miR-181d(1)		miR-181c-5p(1)//miR-181d-5p(1)	0.5	NA	NA	NA	NA	0	0.5
MANEA		mmu-miR-181c(1)//mmu-miR-181d(1)	mmu-miR-181c-5p(1)//mmu-miR-181d-5p(1)			miR-181c-5p(1)//miR-181d-5p(1)	0.5	NA	NA	NA	NA	0	0.5
MAP3K8		mmu-miR-181c(1)//mmu-miR-181d(1)	mmu-miR-181c-5p(1)//mmu-miR-181d-5p(1)			miR-181c-5p(1)//miR-181d-5p(1)	0.5	NA	NA	NA	NA	0	0.5
MAP4K4	mmu-miR-181c-5p(1)//mmu-miR-181d-5p(1)		mmu-miR-181c-5p(1)//mmu-miR-181d-5p(1)			miR-181c-5p(1)//miR-181d-5p(1)	0.5	NA	NA	NA	NA	0	0.5
MARCKS	mmu-miR-181c-5p(1)//mmu-miR-181d-5p(1)		mmu-miR-181c-5p(1)//mmu-miR-181d-5p(1)			miR-181c-5p(1)//miR-181d-5p(1)	0.5	NA	NA	NA	NA	0	0.5
MBD5	mmu-miR-181c-5p(1)//mmu-miR-181d-5p(1)	mmu-miR-181c(1)//mmu-miR-181d(1)				miR-181c-5p(1)//miR-181d-5p(1)	0.5	NA	NA	NA	NA	0	0.5
MBTD1		mmu-miR-181c(1)//mmu-miR-181d(5)	mmu-miR-181c-5p(1)//mmu-miR-181d-5p(1)			miR-181c-5p(1)//miR-181d-5p(1)	0.5	NA	NA	NA	NA	0	0.5
MCM4		mmu-miR-181c(1)//mmu-miR-181d(1)	mmu-miR-181c-5p(1)//mmu-miR-181d-5p(1)			miR-181c-5p(1)//miR-181d-5p(1)	0.5	NA	NA	NA	NA	0	0.5
MCTP1		mmu-miR-181c(2)//mmu-miR-181d(2)	mmu-miR-181c-5p(1)//mmu-miR-181d-5p(1)			miR-181c-5p(1)//miR-181d-5p(1)	0.5	NA	NA	NA	NA	0	0.5
MDFIC		mmu-miR-181c(2)//mmu-miR-181d(2)	mmu-miR-181c-5p(1)//mmu-miR-181d-5p(1)		miR-181c-5p(1)//miR-181d-5p(1)		0.5	NA	NA	NA	NA	0	0.5
ME1		mmu-miR-181c(1)//mmu-miR-181d(1)	mmu-miR-181c-5p(1)//mmu-miR-181d-5p(1)			miR-181c-5p(1)//miR-181d-5p(1)	0.5	NA	NA	NA	NA	0	0.5
ME2		mmu-miR-181c(2)//mmu-miR-181d(1)	mmu-miR-181c-5p(1)//mmu-miR-181d-5p(1)			miR-181c-5p(1)//miR-181d-5p(1)	0.5	NA	NA	NA	NA	0	0.5
MEF2A	mmu-miR-181c-5p(2)//mmu-miR-181d-5p(2)		mmu-miR-181c-5p(1)//mmu-miR-181d-5p(1)			miR-181c-5p(1)//miR-181d-5p(1)	0.5	NA	NA	NA	NA	0	0.5
MFAP3L	mmu-miR-181c-5p(1)//mmu-miR-181d-5p(1)		mmu-miR-181c-5p(1)//mmu-miR-181d-5p(1)			miR-181c-5p(1)//miR-181d-5p(1)	0.5	NA	NA	NA	NA	0	0.5
MGAT2	mmu-miR-181c-5p(1)//mmu-miR-181d-5p(1)		mmu-miR-181c-5p(1)//mmu-miR-181d-5p(1)			miR-181c-5p(1)//miR-181d-5p(1)	0.5	NA	NA	NA	NA	0	0.5
MIPEP		mmu-miR-181c(2)//mmu-miR-181d(2)	mmu-miR-181c-5p(1)//mmu-miR-181d-5p(1)			miR-181c-5p(1)//miR-181d-5p(1)	0.5	NA	NA	NA	NA	0	0.5
MKRN1		mmu-miR-181c(2)//mmu-miR-181d(2)	mmu-miR-181c-5p(1)//mmu-miR-181d-5p(1)			miR-181c-5p(1)//miR-181d-5p(1)	0.5	NA	NA	NA	NA	0	0.5
MLXIP	mmu-miR-181c-5p(1)//mmu-miR-181d-5p(1)		mmu-miR-181c-5p(1)//mmu-miR-181d-5p(1)			miR-181c-5p(1)//miR-181d-5p(1)	0.5	NA	NA	NA	NA	0	0.5
MOGS	mmu-miR-181c-5p(1)//mmu-miR-181d-5p(1)	mmu-miR-181c(1)//mmu-miR-181d(1)				miR-181c-5p(1)//miR-181d-5p(1)	0.5	NA	NA	NA	NA	0	0.5
MORC4		mmu-miR-181c(2)//mmu-miR-181d(2)	mmu-miR-181c-5p(1)//mmu-miR-181d-5p(1)			miR-181c-5p(1)//miR-181d-5p(1)	0.5	NA	NA	NA	NA	0	0.5
MPI		mmu-miR-181c(1)//mmu-miR-181d(1)	mmu-miR-181c-5p(1)//mmu-miR-181d-5p(1)			miR-181c-5p(1)//miR-181d-5p(1)	0.5	NA	NA	NA	NA	0	0.5
MPP1		mmu-miR-181c(1)//mmu-miR-181d(5)	mmu-miR-181c-5p(1)//mmu-miR-181d-5p(1)			miR-181c-5p(1)//miR-181d-5p(1)	0.5	NA	NA	NA	NA	0	0.5
MPP4		mmu-miR-181c(1)//mmu-miR-181d(1)	mmu-miR-181c-5p(1)//mmu-miR-181d-5p(1)			miR-181c-5p(1)//miR-181d-5p(1)	0.5	NA	NA	NA	NA	0	0.5
MRPL13		mmu-miR-181c(1)//mmu-miR-181d(1)	mmu-miR-181c-5p(1)//mmu-miR-181d-5p(1)			miR-181c-5p(1)//miR-181d-5p(1)	0.5	NA	NA	NA	NA	0	0.5
MRPL35		mmu-miR-181c(1)//mmu-miR-181d(2)	mmu-miR-181c-5p(1)//mmu-miR-181d-5p(1)			miR-181c-5p(1)//miR-181d-5p(1)	0.5	NA	NA	NA	NA	0	0.5
MRPS9		mmu-miR-181c(1)//mmu-miR-181d(1)	mmu-miR-181c-5p(1)//mmu-miR-181d-5p(1)			miR-181c-5p(1)//miR-181d-5p(1)	0.5	NA	NA	NA	NA	0	0.5
MS4A1		mmu-miR-181c(1)//mmu-miR-181d(2)	mmu-miR-181c-5p(1)//mmu-miR-181d-5p(1)			miR-181c-5p(1)//miR-181d-5p(1)	0.5	NA	NA	NA	NA	0	0.5
MSI1	mmu-miR-181c-5p(1)//mmu-miR-181d-5p(1)		mmu-miR-181c-5p(1)//mmu-miR-181d-5p(1)			miR-181c-5p(1)//miR-181d-5p(1)	0.5	NA	NA	NA	NA	0	0.5
MYO9B		mmu-miR-181c(2)//mmu-miR-181d(2)	mmu-miR-181c-5p(1)//mmu-miR-181d-5p(1)			miR-181c-5p(1)//miR-181d-5p(1)	0.5	NA	NA	NA	NA	0	0.5
MYOF		mmu-miR-181c(2)//mmu-miR-181d(3)	mmu-miR-181c-5p(1)//mmu-miR-181d-5p(1)			miR-181c-5p(1)//miR-181d-5p(1)	0.5	NA	NA	NA	NA	0	0.5
NAPG		mmu-miR-181c(1)//mmu-miR-181d(1)	mmu-miR-181c-5p(1)//mmu-miR-181d-5p(1)			miR-181c-5p(1)//miR-181d-5p(1)	0.5	NA	NA	NA	NA	0	0.5
NCBP1		mmu-miR-181c(2)//mmu-miR-181d(2)	mmu-miR-181c-5p(1)//mmu-miR-181d-5p(1)			miR-181c-5p(1)//miR-181d-5p(1)	0.5	NA	NA	NA	NA	0	0.5
NCEH1		mmu-miR-181c(1)//mmu-miR-181d(3)	mmu-miR-181c-5p(1)//mmu-miR-181d-5p(1)			miR-181c-5p(1)//miR-181d-5p(1)	0.5	NA	NA	NA	NA	0	0.5
NCK2		mmu-miR-181c(2)//mmu-miR-181d(1)	mmu-miR-181c-5p(1)//mmu-miR-181d-5p(1)			miR-181c-5p(1)//miR-181d-5p(1)	0.5	NA	NA	NA	NA	0	0.5
NCOA1		mmu-miR-181c(2)//mmu-miR-181d(2)	mmu-miR-181c-5p(1)//mmu-miR-181d-5p(1)			miR-181c-5p(1)//miR-181d-5p(1)	0.5	NA	NA	NA	NA	0	0.5
NCOA7		mmu-miR-181c(7)//mmu-miR-181d(7)	mmu-miR-181c-5p(1)//mmu-miR-181d-5p(1)			miR-181c-5p(1)//miR-181d-5p(1)	0.5	NA	NA	NA	NA	0	0.5
NDRG3		mmu-miR-181c(1)//mmu-miR-181d(1)	mmu-miR-181c-5p(1)//mmu-miR-181d-5p(1)			miR-181c-5p(1)//miR-181d-5p(1)	0.5	NA	NA	NA	NA	0	0.5
NDRG4		mmu-miR-181c(1)//mmu-miR-181d(1)	mmu-miR-181c-5p(1)//mmu-miR-181d-5p(1)			miR-181c-5p(1)//miR-181d-5p(1)	0.5	NA	NA	NA	NA	0	0.5
NINL		mmu-miR-181c(2)//mmu-miR-181d(2)	mmu-miR-181c-5p(1)//mmu-miR-181d-5p(1)			miR-181c-5p(1)//miR-181d-5p(1)	0.5	NA	NA	NA	NA	0	0.5
NIPAL2		mmu-miR-181c(1)//mmu-miR-181d(1)	mmu-miR-181c-5p(1)//mmu-miR-181d-5p(1)			miR-181c-5p(1)//miR-181d-5p(1)	0.5	NA	NA	NA	NA	0	0.5
NIPBL	mmu-miR-181c-5p(1)//mmu-miR-181d-5p(1)	mmu-miR-181c(5)//mmu-miR-181d(3)				miR-181c-5p(1)//miR-181d-5p(1)	0.5	NA	NA	NA	NA	0	0.5
NKAP		mmu-miR-181c(1)//mmu-miR-181d(2)	mmu-miR-181c-5p(1)//mmu-miR-181d-5p(1)			miR-181c-5p(1)//miR-181d-5p(1)	0.5	NA	NA	NA	NA	0	0.5
NMT2	mmu-miR-181c-5p(1)//mmu-miR-181d-5p(1)		mmu-miR-181c-5p(1)//mmu-miR-181d-5p(1)			miR-181c-5p(1)//miR-181d-5p(1)	0.5	NA	NA	NA	NA	0	0.5
NRCAM		mmu-miR-181c(1)//mmu-miR-181d(1)	mmu-miR-181c-5p(1)//mmu-miR-181d-5p(1)			miR-181c-5p(1)//miR-181d-5p(1)	0.5	NA	NA	NA	NA	0	0.5
NRGN		mmu-miR-181c(2)//mmu-miR-181d(1)	mmu-miR-181c-5p(1)//mmu-miR-181d-5p(1)			miR-181c-5p(1)//miR-181d-5p(1)	0.5	NA	NA	NA	NA	0	0.5
NRP2		mmu-miR-181c(1)//mmu-miR-181d(2)		mmu-miR-181c(1)//mmu-miR-181d(1)		miR-181c-5p(1)//miR-181d-5p(1)	0.5	NA	NA	NA	NA	0	0.5
NRXN3		mmu-miR-181c(2)//mmu-miR-181d(2)	mmu-miR-181c-5p(1)//mmu-miR-181d-5p(1)			miR-181c-5p(1)//miR-181d-5p(1)	0.5	NA	NA	NA	NA	0	0.5
NSMCE2		mmu-miR-181c(1)//mmu-miR-181d(1)	mmu-miR-181c-5p(1)//mmu-miR-181d-5p(1)			miR-181c-5p(1)//miR-181d-5p(1)	0.5	NA	NA	NA	NA	0	0.5
NUDT9		mmu-miR-181c(1)//mmu-miR-181d(1)	mmu-miR-181c-5p(1)//mmu-miR-181d-5p(1)			miR-181c-5p(1)//miR-181d-5p(1)	0.5	NA	NA	NA	NA	0	0.5
NUFIP2	mmu-miR-181c-5p(1)//mmu-miR-181d-5p(1)			mmu-miR-181c(1)//mmu-miR-181d(1)		miR-181c-5p(1)//miR-181d-5p(1)	0.5	NA	NA	NA	NA	0	0.5
NXT2		mmu-miR-181c(1)//mmu-miR-181d(1)	mmu-miR-181c-5p(1)//mmu-miR-181d-5p(1)			miR-181c-5p(1)//miR-181d-5p(1)	0.5	NA	NA	NA	NA	0	0.5
OAT		mmu-miR-181c(2)//mmu-miR-181d(2)	mmu-miR-181c-5p(1)//mmu-miR-181d-5p(1)			miR-181c-5p(1)//miR-181d-5p(1)	0.5	NA	NA	NA	NA	0	0.5
OXCT1		mmu-miR-181c(1)//mmu-miR-181d(1)	mmu-miR-181c-5p(1)//mmu-miR-181d-5p(1)			miR-181c-5p(1)//miR-181d-5p(1)	0.5	NA	NA	NA	NA	0	0.5
P2RY10		mmu-miR-181c(3)//mmu-miR-181d(3)	mmu-miR-181c-5p(1)//mmu-miR-181d-5p(1)			miR-181c-5p(1)//miR-181d-5p(1)	0.5	NA	NA	NA	NA	0	0.5
PANK4		mmu-miR-181c(1)//mmu-miR-181d(1)	mmu-miR-181c-5p(1)//mmu-miR-181d-5p(1)			miR-181c-5p(1)//miR-181d-5p(1)	0.5	NA	NA	NA	NA	0	0.5
PARP11		mmu-miR-181c(1)//mmu-miR-181d(1)	mmu-miR-181c-5p(1)//mmu-miR-181d-5p(1)			miR-181c-5p(1)//miR-181d-5p(1)	0.5	NA	NA	NA	NA	0	0.5
PCDHA10	mmu-miR-181c-5p(2)//mmu-miR-181d-5p(2)	mmu-miR-181c(2)//mmu-miR-181d(3)				miR-181c-5p(1)//miR-181d-5p(1)	0.5	NA	NA	NA	NA	0	0.5
PCDHB3		mmu-miR-181c(1)//mmu-miR-181d(1)	mmu-miR-181c-5p(1)//mmu-miR-181d-5p(1)			miR-181c-5p(1)//miR-181d-5p(1)	0.5	NA	NA	NA	NA	0	0.5
PCGF2	mmu-miR-181c-5p(1)//mmu-miR-181d-5p(1)		mmu-miR-181c-5p(1)//mmu-miR-181d-5p(1)			miR-181c-5p(1)//miR-181d-5p(1)	0.5	NA	NA	NA	NA	0	0.5
PCNA		mmu-miR-181c(1)//mmu-miR-181d(1)	mmu-miR-181c-5p(1)//mmu-miR-181d-5p(1)			miR-181c-5p(1)//miR-181d-5p(1)	0.5	NA	NA	NA	NA	0	0.5
PDCD6IP	mmu-miR-181c-5p(1)//mmu-miR-181d-5p(1)		mmu-miR-181c-5p(1)//mmu-miR-181d-5p(1)			miR-181c-5p(1)//miR-181d-5p(1)	0.5	NA	NA	NA	NA	0	0.5
PDE1C		mmu-miR-181c(1)//mmu-miR-181d(1)	mmu-miR-181c-5p(1)//mmu-miR-181d-5p(1)			miR-181c-5p(1)//miR-181d-5p(1)	0.5	NA	NA	NA	NA	0	0.5
PDE4B		mmu-miR-181c(2)//mmu-miR-181d(1)	mmu-miR-181c-5p(1)//mmu-miR-181d-5p(1)			miR-181c-5p(1)//miR-181d-5p(1)	0.5	NA	NA	NA	NA	0	0.5
PDE4DIP		mmu-miR-181c(2)//mmu-miR-181d(3)	mmu-miR-181c-5p(1)//mmu-miR-181d-5p(1)			miR-181c-5p(1)//miR-181d-5p(1)	0.5	NA	NA	NA	NA	0	0.5
PDE5A	mmu-miR-181c-5p(1)//mmu-miR-181d-5p(1)		mmu-miR-181c-5p(1)//mmu-miR-181d-5p(1)			miR-181c-5p(1)//miR-181d-5p(1)	0.5	NA	NA	NA	NA	0	0.5
PDGFC		mmu-miR-181c(1)//mmu-miR-181d(1)	mmu-miR-181c-5p(1)//mmu-miR-181d-5p(1)			miR-181c-5p(1)//miR-181d-5p(1)	0.5	NA	NA	NA	NA	0	0.5
PDHB		mmu-miR-181c(1)//mmu-miR-181d(1)	mmu-miR-181c-5p(1)//mmu-miR-181d-5p(1)			miR-181c-5p(1)//miR-181d-5p(1)	0.5	NA	NA	NA	NA	0	0.5
PDHX	mmu-miR-181c-5p(1)//mmu-miR-181d-5p(1)	mmu-miR-181c(1)//mmu-miR-181d(1)				miR-181c-5p(1)//miR-181d-5p(1)	0.5	NA	NA	NA	NA	0	0.5
PGAP1	mmu-miR-181c-5p(1)//mmu-miR-181d-5p(1)		mmu-miR-181c-5p(1)//mmu-miR-181d-5p(1)			miR-181c-5p(1)//miR-181d-5p(1)	0.5	NA	NA	NA	NA	0	0.5
PHF20		mmu-miR-181c(2)//mmu-miR-181d(2)	mmu-miR-181c-5p(1)//mmu-miR-181d-5p(1)			miR-181c-5p(1)//miR-181d-5p(1)	0.5	NA	NA	NA	NA	0	0.5
PHIP	mmu-miR-181c-5p(2)//mmu-miR-181d-5p(2)		mmu-miR-181c-5p(1)//mmu-miR-181d-5p(1)			miR-181c-5p(1)//miR-181d-5p(1)	0.5	NA	NA	NA	NA	0	0.5
PHKA1		mmu-miR-181c(1)//mmu-miR-181d(1)	mmu-miR-181c-5p(1)//mmu-miR-181d-5p(1)			miR-181c-5p(1)//miR-181d-5p(1)	0.5	NA	NA	NA	NA	0	0.5
PIBF1		mmu-miR-181c(4)//mmu-miR-181d(4)	mmu-miR-181c-5p(1)//mmu-miR-181d-5p(1)		miR-181c-5p(1)//miR-181d-5p(1)		0.5	NA	NA	NA	NA	0	0.5
PIK3R1		mmu-miR-181c(1)//mmu-miR-181d(1)	mmu-miR-181c-5p(1)//mmu-miR-181d-5p(1)			miR-181c-5p(1)//miR-181d-5p(1)	0.5	NA	NA	NA	NA	0	0.5
PIP4K2C		mmu-miR-181c(1)//mmu-miR-181d(1)		mmu-miR-181c(1)//mmu-miR-181d(1)		miR-181c-5p(1)//miR-181d-5p(1)	0.5	NA	NA	NA	NA	0	0.5
PITPNC1		mmu-miR-181c(1)//mmu-miR-181d(2)	mmu-miR-181c-5p(1)//mmu-miR-181d-5p(1)			miR-181c-5p(1)//miR-181d-5p(1)	0.5	NA	NA	NA	NA	0	0.5
PKIB		mmu-miR-181c(1)//mmu-miR-181d(1)	mmu-miR-181c-5p(1)//mmu-miR-181d-5p(1)			miR-181c-5p(1)//miR-181d-5p(1)	0.5	NA	NA	NA	NA	0	0.5
PLA2G4A		mmu-miR-181c(1)//mmu-miR-181d(1)	mmu-miR-181c-5p(1)//mmu-miR-181d-5p(1)			miR-181c-5p(1)//miR-181d-5p(1)	0.5	NA	NA	NA	NA	0	0.5
PLEKHG3		mmu-miR-181c(1)//mmu-miR-181d(1)	mmu-miR-181c-5p(1)//mmu-miR-181d-5p(1)			miR-181c-5p(1)//miR-181d-5p(1)	0.5	NA	NA	NA	NA	0	0.5
PLK4		mmu-miR-181c(1)//mmu-miR-181d(1)	mmu-miR-181c-5p(1)//mmu-miR-181d-5p(1)			miR-181c-5p(1)//miR-181d-5p(1)	0.5	NA	NA	NA	NA	0	0.5
PLP1	mmu-miR-181c-5p(1)//mmu-miR-181d-5p(1)		mmu-miR-181c-5p(1)//mmu-miR-181d-5p(1)			miR-181c-5p(1)//miR-181d-5p(1)	0.5	NA	NA	NA	NA	0	0.5
POC1B		mmu-miR-181c(1)//mmu-miR-181d(2)	mmu-miR-181c-5p(1)//mmu-miR-181d-5p(1)			miR-181c-5p(1)//miR-181d-5p(1)	0.5	NA	NA	NA	NA	0	0.5
PODXL	mmu-miR-181c-5p(2)//mmu-miR-181d-5p(2)		mmu-miR-181c-5p(1)//mmu-miR-181d-5p(1)			miR-181c-5p(1)//miR-181d-5p(1)	0.5	NA	NA	NA	NA	0	0.5
POLR3G		mmu-miR-181c(1)//mmu-miR-181d(1)	mmu-miR-181c-5p(1)//mmu-miR-181d-5p(1)			miR-181c-5p(1)//miR-181d-5p(1)	0.5	NA	NA	NA	NA	0	0.5
POU2F1	mmu-miR-181c-5p(6)//mmu-miR-181d-5p(6)		mmu-miR-181c-5p(1)//mmu-miR-181d-5p(1)			miR-181c-5p(1)//miR-181d-5p(1)	0.5	NA	NA	NA	NA	0	0.5
PPAP2B	mmu-miR-181c-5p(1)//mmu-miR-181d-5p(1)		mmu-miR-181c-5p(1)//mmu-miR-181d-5p(1)		miR-181c-5p(1)//miR-181d-5p(1)		0.5	NA	NA	NA	NA	0	0.5
PPFIA2		mmu-miR-181c(1)//mmu-miR-181d(1)	mmu-miR-181c-5p(1)//mmu-miR-181d-5p(1)			miR-181c-5p(1)//miR-181d-5p(1)	0.5	NA	NA	NA	NA	0	0.5
PPP1R2		mmu-miR-181c(2)//mmu-miR-181d(2)	mmu-miR-181c-5p(1)//mmu-miR-181d-5p(1)			miR-181c-5p(1)//miR-181d-5p(1)	0.5	NA	NA	NA	NA	0	0.5
PPP1R3C		mmu-miR-181c(2)//mmu-miR-181d(2)	mmu-miR-181c-5p(1)//mmu-miR-181d-5p(1)			miR-181c-5p(1)//miR-181d-5p(1)	0.5	NA	NA	NA	NA	0	0.5
PREX2		mmu-miR-181c(1)//mmu-miR-181d(1)	mmu-miR-181c-5p(1)//mmu-miR-181d-5p(1)			miR-181c-5p(1)//miR-181d-5p(1)	0.5	NA	NA	NA	NA	0	0.5
PRICKLE2	mmu-miR-181c-5p(1)//mmu-miR-181d-5p(1)		mmu-miR-181c-5p(1)//mmu-miR-181d-5p(1)			miR-181c-5p(1)//miR-181d-5p(1)	0.5	NA	NA	NA	NA	0	0.5
PRKAG2		mmu-miR-181c(3)//mmu-miR-181d(2)	mmu-miR-181c-5p(1)//mmu-miR-181d-5p(1)			miR-181c-5p(1)//miR-181d-5p(1)	0.5	NA	NA	NA	NA	0	0.5
PRKAR2A	mmu-miR-181c-5p(1)//mmu-miR-181d-5p(1)		mmu-miR-181c-5p(1)//mmu-miR-181d-5p(1)			miR-181c-5p(1)//miR-181d-5p(1)	0.5	NA	NA	NA	NA	0	0.5
PROM2		mmu-miR-181c(1)//mmu-miR-181d(1)	mmu-miR-181c-5p(1)//mmu-miR-181d-5p(1)			miR-181c-5p(1)//miR-181d-5p(1)	0.5	NA	NA	NA	NA	0	0.5
PTPDC1		mmu-miR-181c(1)//mmu-miR-181d(1)	mmu-miR-181c-5p(1)//mmu-miR-181d-5p(1)			miR-181c-5p(1)//miR-181d-5p(1)	0.5	NA	NA	NA	NA	0	0.5
PTPN3	mmu-miR-181c-5p(1)//mmu-miR-181d-5p(1)		mmu-miR-181c-5p(1)//mmu-miR-181d-5p(1)			miR-181c-5p(1)//miR-181d-5p(1)	0.5	NA	NA	NA	NA	0	0.5
RAB21		mmu-miR-181c(1)//mmu-miR-181d(1)	mmu-miR-181c-5p(1)//mmu-miR-181d-5p(1)			miR-181c-5p(1)//miR-181d-5p(1)	0.5	NA	NA	NA	NA	0	0.5
RAD17		mmu-miR-181c(1)//mmu-miR-181d(1)	mmu-miR-181c-5p(1)//mmu-miR-181d-5p(1)			miR-181c-5p(1)//miR-181d-5p(1)	0.5	NA	NA	NA	NA	0	0.5
RAD50		mmu-miR-181c(1)//mmu-miR-181d(1)	mmu-miR-181c-5p(1)//mmu-miR-181d-5p(1)			miR-181c-5p(1)//miR-181d-5p(1)	0.5	NA	NA	NA	NA	0	0.5
RAI1	mmu-miR-181c-5p(1)//mmu-miR-181d-5p(1)	mmu-miR-181c(1)//mmu-miR-181d(1)				miR-181c-5p(1)//miR-181d-5p(1)	0.5	NA	NA	NA	NA	0	0.5
RANBP6		mmu-miR-181c(1)//mmu-miR-181d(1)	mmu-miR-181c-5p(1)//mmu-miR-181d-5p(1)			miR-181c-5p(1)//miR-181d-5p(1)	0.5	NA	NA	NA	NA	0	0.5
RAP1A	mmu-miR-181c-5p(1)//mmu-miR-181d-5p(1)		mmu-miR-181c-5p(1)//mmu-miR-181d-5p(1)			miR-181c-5p(1)//miR-181d-5p(1)	0.5	NA	NA	NA	NA	0	0.5
RAP1GAP2		mmu-miR-181c(1)//mmu-miR-181d(1)	mmu-miR-181c-5p(1)//mmu-miR-181d-5p(1)			miR-181c-5p(1)//miR-181d-5p(1)	0.5	NA	NA	NA	NA	0	0.5
RAPGEF2	mmu-miR-181c-5p(1)//mmu-miR-181d-5p(1)		mmu-miR-181c-5p(1)//mmu-miR-181d-5p(1)			miR-181c-5p(1)//miR-181d-5p(1)	0.5	NA	NA	NA	NA	0	0.5
RAPGEF6		mmu-miR-181c(1)//mmu-miR-181d(1)	mmu-miR-181c-5p(1)//mmu-miR-181d-5p(1)			miR-181c-5p(1)//miR-181d-5p(1)	0.5	NA	NA	NA	NA	0	0.5
RBM18		mmu-miR-181c(1)//mmu-miR-181d(1)	mmu-miR-181c-5p(1)//mmu-miR-181d-5p(1)			miR-181c-5p(1)//miR-181d-5p(1)	0.5	NA	NA	NA	NA	0	0.5
RBM33		mmu-miR-181c(2)//mmu-miR-181d(2)	mmu-miR-181c-5p(1)//mmu-miR-181d-5p(1)			miR-181c-5p(1)//miR-181d-5p(1)	0.5	NA	NA	NA	NA	0	0.5
RBM34		mmu-miR-181c(1)//mmu-miR-181d(4)	mmu-miR-181c-5p(1)//mmu-miR-181d-5p(1)			miR-181c-5p(1)//miR-181d-5p(1)	0.5	NA	NA	NA	NA	0	0.5
RBMS2		mmu-miR-181c(1)//mmu-miR-181d(1)	mmu-miR-181c-5p(1)//mmu-miR-181d-5p(1)			miR-181c-5p(1)//miR-181d-5p(1)	0.5	NA	NA	NA	NA	0	0.5
RCN3		mmu-miR-181c(1)//mmu-miR-181d(1)	mmu-miR-181c-5p(1)//mmu-miR-181d-5p(1)			miR-181c-5p(1)//miR-181d-5p(1)	0.5	NA	NA	NA	NA	0	0.5
RFX2		mmu-miR-181c(1)//mmu-miR-181d(1)	mmu-miR-181c-5p(1)//mmu-miR-181d-5p(1)			miR-181c-5p(1)//miR-181d-5p(1)	0.5	NA	NA	NA	NA	0	0.5
RFX5		mmu-miR-181c(2)//mmu-miR-181d(4)	mmu-miR-181c-5p(1)//mmu-miR-181d-5p(1)			miR-181c-5p(1)//miR-181d-5p(1)	0.5	NA	NA	NA	NA	0	0.5
RGS4		mmu-miR-181c(1)//mmu-miR-181d(1)	mmu-miR-181c-5p(1)//mmu-miR-181d-5p(1)			miR-181c-5p(1)//miR-181d-5p(1)	0.5	NA	NA	NA	NA	0	0.5
RIMKLA		mmu-miR-181c(1)//mmu-miR-181d(1)	mmu-miR-181c-5p(1)//mmu-miR-181d-5p(1)			miR-181c-5p(1)//miR-181d-5p(1)	0.5	NA	NA	NA	NA	0	0.5
RIPK4		mmu-miR-181c(1)//mmu-miR-181d(1)	mmu-miR-181c-5p(1)//mmu-miR-181d-5p(1)			miR-181c-5p(1)//miR-181d-5p(1)	0.5	NA	NA	NA	NA	0	0.5
RNF187		mmu-miR-181c(1)//mmu-miR-181d(1)	mmu-miR-181c-5p(1)//mmu-miR-181d-5p(1)			miR-181c-5p(1)//miR-181d-5p(1)	0.5	NA	NA	NA	NA	0	0.5
RNF20		mmu-miR-181c(2)//mmu-miR-181d(2)	mmu-miR-181c-5p(1)//mmu-miR-181d-5p(1)			miR-181c-5p(1)//miR-181d-5p(1)	0.5	NA	NA	NA	NA	0	0.5
RNF219		mmu-miR-181c(1)//mmu-miR-181d(1)	mmu-miR-181c-5p(1)//mmu-miR-181d-5p(1)			miR-181c-5p(1)//miR-181d-5p(1)	0.5	NA	NA	NA	NA	0	0.5
RNF7		mmu-miR-181c(1)//mmu-miR-181d(1)	mmu-miR-181c-5p(1)//mmu-miR-181d-5p(1)			miR-181c-5p(1)//miR-181d-5p(1)	0.5	NA	NA	NA	NA	0	0.5
RPAP2		mmu-miR-181c(2)//mmu-miR-181d(2)	mmu-miR-181c-5p(1)//mmu-miR-181d-5p(1)			miR-181c-5p(1)//miR-181d-5p(1)	0.5	NA	NA	NA	NA	0	0.5
RPIA		mmu-miR-181c(1)//mmu-miR-181d(1)	mmu-miR-181c-5p(1)//mmu-miR-181d-5p(1)			miR-181c-5p(1)//miR-181d-5p(1)	0.5	NA	NA	NA	NA	0	0.5
RPL22		mmu-miR-181c(1)//mmu-miR-181d(1)	mmu-miR-181c-5p(1)//mmu-miR-181d-5p(1)			miR-181c-5p(1)//miR-181d-5p(1)	0.5	NA	NA	NA	NA	0	0.5
RPS6KA3	mmu-miR-181c-5p(2)//mmu-miR-181d-5p(2)		mmu-miR-181c-5p(1)//mmu-miR-181d-5p(1)			miR-181c-5p(1)//miR-181d-5p(1)	0.5	NA	NA	NA	NA	0	0.5
RRAGA		mmu-miR-181c(1)//mmu-miR-181d(1)	mmu-miR-181c-5p(1)//mmu-miR-181d-5p(1)			miR-181c-5p(1)//miR-181d-5p(1)	0.5	NA	NA	NA	NA	0	0.5
RSAD1		mmu-miR-181c(1)//mmu-miR-181d(1)	mmu-miR-181c-5p(1)//mmu-miR-181d-5p(1)			miR-181c-5p(1)//miR-181d-5p(1)	0.5	NA	NA	NA	NA	0	0.5
SASH3		mmu-miR-181c(1)//mmu-miR-181d(1)	mmu-miR-181c-5p(1)//mmu-miR-181d-5p(1)			miR-181c-5p(1)//miR-181d-5p(1)	0.5	NA	NA	NA	NA	0	0.5
SCAI	mmu-miR-181c-5p(2)//mmu-miR-181d-5p(2)		mmu-miR-181c-5p(1)//mmu-miR-181d-5p(1)			miR-181c-5p(1)//miR-181d-5p(1)	0.5	NA	NA	NA	NA	0	0.5
SCML2		mmu-miR-181c(2)//mmu-miR-181d(2)	mmu-miR-181c-5p(1)//mmu-miR-181d-5p(1)			miR-181c-5p(1)//miR-181d-5p(1)	0.5	NA	NA	NA	NA	0	0.5
SCN4B		mmu-miR-181c(1)//mmu-miR-181d(1)	mmu-miR-181c-5p(1)//mmu-miR-181d-5p(1)			miR-181c-5p(1)//miR-181d-5p(1)	0.5	NA	NA	NA	NA	0	0.5
SCN9A		mmu-miR-181c(1)//mmu-miR-181d(1)	mmu-miR-181c-5p(1)//mmu-miR-181d-5p(1)			miR-181c-5p(1)//miR-181d-5p(1)	0.5	NA	NA	NA	NA	0	0.5
SCYL3		mmu-miR-181c(1)//mmu-miR-181d(1)	mmu-miR-181c-5p(1)//mmu-miR-181d-5p(1)			miR-181c-5p(1)//miR-181d-5p(1)	0.5	NA	NA	NA	NA	0	0.5
SEH1L		mmu-miR-181c(2)//mmu-miR-181d(2)	mmu-miR-181c-5p(1)//mmu-miR-181d-5p(1)			miR-181c-5p(1)//miR-181d-5p(1)	0.5	NA	NA	NA	NA	0	0.5
SEMA6D		mmu-miR-181c(4)//mmu-miR-181d(4)	mmu-miR-181c-5p(1)//mmu-miR-181d-5p(1)			miR-181c-5p(1)//miR-181d-5p(1)	0.5	NA	NA	NA	NA	0	0.5
SETX		mmu-miR-181c(1)//mmu-miR-181d(1)	mmu-miR-181c-5p(1)//mmu-miR-181d-5p(1)			miR-181c-5p(1)//miR-181d-5p(1)	0.5	NA	NA	NA	NA	0	0.5
SFMBT1	mmu-miR-181c-5p(2)//mmu-miR-181d-5p(2)		mmu-miR-181c-5p(1)//mmu-miR-181d-5p(1)			miR-181c-5p(1)//miR-181d-5p(1)	0.5	NA	NA	NA	NA	0	0.5
SFR1	mmu-miR-181c-5p(1)//mmu-miR-181d-5p(1)		mmu-miR-181c-5p(1)//mmu-miR-181d-5p(1)			miR-181c-5p(1)//miR-181d-5p(1)	0.5	NA	NA	NA	NA	0	0.5
SH3D19		mmu-miR-181c(3)//mmu-miR-181d(3)	mmu-miR-181c-5p(1)//mmu-miR-181d-5p(1)		miR-181c-5p(1)//miR-181d-5p(1)		0.5	NA	NA	NA	NA	0	0.5
SHROOM3	mmu-miR-181c-5p(1)//mmu-miR-181d-5p(1)		mmu-miR-181c-5p(1)//mmu-miR-181d-5p(1)			miR-181c-5p(1)//miR-181d-5p(1)	0.5	NA	NA	NA	NA	0	0.5
SIKE1		mmu-miR-181c(1)//mmu-miR-181d(1)	mmu-miR-181c-5p(1)//mmu-miR-181d-5p(1)			miR-181c-5p(1)//miR-181d-5p(1)	0.5	NA	NA	NA	NA	0	0.5
SIM1		mmu-miR-181c(1)//mmu-miR-181d(1)	mmu-miR-181c-5p(1)//mmu-miR-181d-5p(1)			miR-181c-5p(1)//miR-181d-5p(1)	0.5	NA	NA	NA	NA	0	0.5
SKP2		mmu-miR-181c(1)//mmu-miR-181d(3)	mmu-miR-181c-5p(1)//mmu-miR-181d-5p(1)			miR-181c-5p(1)//miR-181d-5p(1)	0.5	NA	NA	NA	NA	0	0.5
SLC12A2		mmu-miR-181c(2)//mmu-miR-181d(1)	mmu-miR-181c-5p(1)//mmu-miR-181d-5p(1)			miR-181c-5p(1)//miR-181d-5p(1)	0.5	NA	NA	NA	NA	0	0.5
SLC12A8		mmu-miR-181c(2)//mmu-miR-181d(2)	mmu-miR-181c-5p(1)//mmu-miR-181d-5p(1)			miR-181c-5p(1)//miR-181d-5p(1)	0.5	NA	NA	NA	NA	0	0.5
SLC16A4		mmu-miR-181c(3)//mmu-miR-181d(2)	mmu-miR-181c-5p(1)//mmu-miR-181d-5p(1)			miR-181c-5p(1)//miR-181d-5p(1)	0.5	NA	NA	NA	NA	0	0.5
SLC17A5		mmu-miR-181c(1)//mmu-miR-181d(2)	mmu-miR-181c-5p(1)//mmu-miR-181d-5p(1)			miR-181c-5p(1)//miR-181d-5p(1)	0.5	NA	NA	NA	NA	0	0.5
SLC1A5		mmu-miR-181c(1)//mmu-miR-181d(1)	mmu-miR-181c-5p(1)//mmu-miR-181d-5p(1)			miR-181c-5p(1)//miR-181d-5p(1)	0.5	NA	NA	NA	NA	0	0.5
SLC25A46		mmu-miR-181c(1)//mmu-miR-181d(1)	mmu-miR-181c-5p(1)//mmu-miR-181d-5p(1)		miR-181c-5p(1)//miR-181d-5p(1)		0.5	NA	NA	NA	NA	0	0.5
SLC30A1	mmu-miR-181c-5p(1)//mmu-miR-181d-5p(1)		mmu-miR-181c-5p(1)//mmu-miR-181d-5p(1)			miR-181c-5p(1)//miR-181d-5p(1)	0.5	NA	NA	NA	NA	0	0.5
SLC30A3		mmu-miR-181c(1)//mmu-miR-181d(1)	mmu-miR-181c-5p(1)//mmu-miR-181d-5p(1)			miR-181c-5p(1)//miR-181d-5p(1)	0.5	NA	NA	NA	NA	0	0.5
SLC31A1		mmu-miR-181c(2)//mmu-miR-181d(2)	mmu-miR-181c-5p(1)//mmu-miR-181d-5p(1)			miR-181c-5p(1)//miR-181d-5p(1)	0.5	NA	NA	NA	NA	0	0.5
SLC35D2		mmu-miR-181c(4)//mmu-miR-181d(4)	mmu-miR-181c-5p(1)//mmu-miR-181d-5p(1)			miR-181c-5p(1)//miR-181d-5p(1)	0.5	NA	NA	NA	NA	0	0.5
SLC36A4		mmu-miR-181c(1)//mmu-miR-181d(1)	mmu-miR-181c-5p(1)//mmu-miR-181d-5p(1)			miR-181c-5p(1)//miR-181d-5p(1)	0.5	NA	NA	NA	NA	0	0.5
SLC37A1		mmu-miR-181c(2)//mmu-miR-181d(2)	mmu-miR-181c-5p(1)//mmu-miR-181d-5p(1)			miR-181c-5p(1)//miR-181d-5p(1)	0.5	NA	NA	NA	NA	0	0.5
SLC9A3	mmu-miR-181c-5p(2)//mmu-miR-181d-5p(2)	mmu-miR-181c(1)//mmu-miR-181d(2)				miR-181c-5p(1)//miR-181d-5p(1)	0.5	NA	NA	NA	NA	0	0.5
SMC2		mmu-miR-181c(1)//mmu-miR-181d(1)	mmu-miR-181c-5p(1)//mmu-miR-181d-5p(1)			miR-181c-5p(1)//miR-181d-5p(1)	0.5	NA	NA	NA	NA	0	0.5
SMG1		mmu-miR-181c(3)//mmu-miR-181d(3)	mmu-miR-181c-5p(1)//mmu-miR-181d-5p(1)			miR-181c-5p(1)//miR-181d-5p(1)	0.5	NA	NA	NA	NA	0	0.5
SNAI2		mmu-miR-181c(1)//mmu-miR-181d(1)	mmu-miR-181c-5p(1)//mmu-miR-181d-5p(1)			miR-181c-5p(1)//miR-181d-5p(1)	0.5	NA	NA	NA	NA	0	0.5
SOCS2	mmu-miR-181c-5p(1)//mmu-miR-181d-5p(1)		mmu-miR-181c-5p(1)//mmu-miR-181d-5p(1)			miR-181c-5p(1)//miR-181d-5p(1)	0.5	NA	NA	NA	NA	0	0.5
SPC24		mmu-miR-181c(1)//mmu-miR-181d(1)	mmu-miR-181c-5p(1)//mmu-miR-181d-5p(1)			miR-181c-5p(1)//miR-181d-5p(1)	0.5	NA	NA	NA	NA	0	0.5
SPCS3		mmu-miR-181c(1)//mmu-miR-181d(1)	mmu-miR-181c-5p(1)//mmu-miR-181d-5p(1)			miR-181c-5p(1)//miR-181d-5p(1)	0.5	NA	NA	NA	NA	0	0.5
SQSTM1		mmu-miR-181c(1)//mmu-miR-181d(1)	mmu-miR-181c-5p(1)//mmu-miR-181d-5p(1)			miR-181c-5p(1)//miR-181d-5p(1)	0.5	NA	NA	NA	NA	0	0.5
SRI		mmu-miR-181c(1)//mmu-miR-181d(1)	mmu-miR-181c-5p(1)//mmu-miR-181d-5p(1)			miR-181c-5p(1)//miR-181d-5p(1)	0.5	NA	NA	NA	NA	0	0.5
SRP9		mmu-miR-181c(1)//mmu-miR-181d(1)	mmu-miR-181c-5p(1)//mmu-miR-181d-5p(1)			miR-181c-5p(1)//miR-181d-5p(1)	0.5	NA	NA	NA	NA	0	0.5
SRSF1	mmu-miR-181c-5p(1)//mmu-miR-181d-5p(1)		mmu-miR-181c-5p(1)//mmu-miR-181d-5p(1)			miR-181c-5p(1)//miR-181d-5p(1)	0.5	NA	NA	NA	NA	0	0.5
STEAP2		mmu-miR-181c(1)//mmu-miR-181d(1)	mmu-miR-181c-5p(1)//mmu-miR-181d-5p(1)			miR-181c-5p(1)//miR-181d-5p(1)	0.5	NA	NA	NA	NA	0	0.5
STIM2	mmu-miR-181c-5p(1)//mmu-miR-181d-5p(1)		mmu-miR-181c-5p(1)//mmu-miR-181d-5p(1)			miR-181c-5p(1)//miR-181d-5p(1)	0.5	NA	NA	NA	NA	0	0.5
STRN	mmu-miR-181c-5p(1)//mmu-miR-181d-5p(1)		mmu-miR-181c-5p(1)//mmu-miR-181d-5p(1)		miR-181c-5p(1)	miR-181c-5p(1)	0.5	NA	NA	NA	NA	0	0.5
SUCLG2		mmu-miR-181c(1)//mmu-miR-181d(1)	mmu-miR-181c-5p(1)//mmu-miR-181d-5p(1)			miR-181c-5p(1)//miR-181d-5p(1)	0.5	NA	NA	NA	NA	0	0.5
SULF2		mmu-miR-181c(1)//mmu-miR-181d(1)	mmu-miR-181c-5p(1)//mmu-miR-181d-5p(1)			miR-181c-5p(1)//miR-181d-5p(1)	0.5	NA	NA	NA	NA	0	0.5
SUMO3		mmu-miR-181c(1)//mmu-miR-181d(1)	mmu-miR-181c-5p(1)//mmu-miR-181d-5p(1)			miR-181c-5p(1)//miR-181d-5p(1)	0.5	NA	NA	NA	NA	0	0.5
SVIP		mmu-miR-181c(1)//mmu-miR-181d(1)	mmu-miR-181c-5p(1)//mmu-miR-181d-5p(1)			miR-181c-5p(1)//miR-181d-5p(1)	0.5	NA	NA	NA	NA	0	0.5
SYNM		mmu-miR-181c(2)//mmu-miR-181d(2)	mmu-miR-181c-5p(1)//mmu-miR-181d-5p(1)			miR-181c-5p(1)//miR-181d-5p(1)	0.5	NA	NA	NA	NA	0	0.5
TADA1		mmu-miR-181c(1)//mmu-miR-181d(2)	mmu-miR-181c-5p(1)//mmu-miR-181d-5p(1)			miR-181c-5p(1)//miR-181d-5p(1)	0.5	NA	NA	NA	NA	0	0.5
TBC1D14	mmu-miR-181c-5p(1)//mmu-miR-181d-5p(1)		mmu-miR-181c-5p(1)//mmu-miR-181d-5p(1)			miR-181c-5p(1)//miR-181d-5p(1)	0.5	NA	NA	NA	NA	0	0.5
TBC1D22A		mmu-miR-181c(2)//mmu-miR-181d(2)	mmu-miR-181c-5p(1)//mmu-miR-181d-5p(1)			miR-181c-5p(1)//miR-181d-5p(1)	0.5	NA	NA	NA	NA	0	0.5
TCF4			mmu-miR-181c-5p(1)//mmu-miR-181d-5p(1)	mmu-miR-181c(1)//mmu-miR-181d(1)		miR-181c-5p(1)//miR-181d-5p(1)	0.5	NA	NA	NA	NA	0	0.5
TEAD1	mmu-miR-181c-5p(1)//mmu-miR-181d-5p(1)	mmu-miR-181c(1)//mmu-miR-181d(1)				miR-181c-5p(1)//miR-181d-5p(1)	0.5	NA	NA	NA	NA	0	0.5
TECPR2		mmu-miR-181c(1)//mmu-miR-181d(1)	mmu-miR-181c-5p(1)//mmu-miR-181d-5p(1)			miR-181c-5p(1)//miR-181d-5p(1)	0.5	NA	NA	NA	NA	0	0.5
TFAM		mmu-miR-181c(1)//mmu-miR-181d(1)	mmu-miR-181c-5p(1)//mmu-miR-181d-5p(1)			miR-181c-5p(1)//miR-181d-5p(1)	0.5	NA	NA	NA	NA	0	0.5
TGIF1		mmu-miR-181c(1)//mmu-miR-181d(1)	mmu-miR-181c-5p(1)//mmu-miR-181d-5p(1)			miR-181c-5p(1)//miR-181d-5p(1)	0.5	NA	NA	NA	NA	0	0.5
THEM4		mmu-miR-181c(1)//mmu-miR-181d(2)	mmu-miR-181c-5p(1)//mmu-miR-181d-5p(1)			miR-181c-5p(1)//miR-181d-5p(1)	0.5	NA	NA	NA	NA	0	0.5
TIAM1		mmu-miR-181c(1)//mmu-miR-181d(1)	mmu-miR-181c-5p(1)//mmu-miR-181d-5p(1)			miR-181c-5p(1)//miR-181d-5p(1)	0.5	NA	NA	NA	NA	0	0.5
TICAM2		mmu-miR-181c(1)//mmu-miR-181d(1)	mmu-miR-181c-5p(1)//mmu-miR-181d-5p(1)			miR-181c-5p(1)//miR-181d-5p(1)	0.5	NA	NA	NA	NA	0	0.5
TIFA		mmu-miR-181c(1)//mmu-miR-181d(1)	mmu-miR-181c-5p(1)//mmu-miR-181d-5p(1)			miR-181c-5p(1)//miR-181d-5p(1)	0.5	NA	NA	NA	NA	0	0.5
TIMM17A		mmu-miR-181c(1)//mmu-miR-181d(1)	mmu-miR-181c-5p(1)//mmu-miR-181d-5p(1)			miR-181c-5p(1)//miR-181d-5p(1)	0.5	NA	NA	NA	NA	0	0.5
TLK1	mmu-miR-181c-5p(1)//mmu-miR-181d-5p(1)		mmu-miR-181c-5p(1)//mmu-miR-181d-5p(1)			miR-181c-5p(1)//miR-181d-5p(1)	0.5	NA	NA	NA	NA	0	0.5
TM6SF1		mmu-miR-181c(1)//mmu-miR-181d(1)	mmu-miR-181c-5p(1)//mmu-miR-181d-5p(1)			miR-181c-5p(1)//miR-181d-5p(1)	0.5	NA	NA	NA	NA	0	0.5
TM9SF4	mmu-miR-181c-5p(1)//mmu-miR-181d-5p(1)		mmu-miR-181c-5p(1)//mmu-miR-181d-5p(1)			miR-181c-5p(1)//miR-181d-5p(1)	0.5	NA	NA	NA	NA	0	0.5
TMED10		mmu-miR-181c(1)//mmu-miR-181d(1)	mmu-miR-181c-5p(1)//mmu-miR-181d-5p(1)			miR-181c-5p(1)//miR-181d-5p(1)	0.5	NA	NA	NA	NA	0	0.5
TMED5		mmu-miR-181c(1)//mmu-miR-181d(1)	mmu-miR-181c-5p(1)//mmu-miR-181d-5p(1)			miR-181c-5p(1)//miR-181d-5p(1)	0.5	NA	NA	NA	NA	0	0.5
TMED9		mmu-miR-181c(1)//mmu-miR-181d(1)	mmu-miR-181c-5p(1)//mmu-miR-181d-5p(1)			miR-181c-5p(1)//miR-181d-5p(1)	0.5	NA	NA	NA	NA	0	0.5
TMEM116		mmu-miR-181c(2)//mmu-miR-181d(2)	mmu-miR-181c-5p(1)//mmu-miR-181d-5p(1)			miR-181c-5p(1)//miR-181d-5p(1)	0.5	NA	NA	NA	NA	0	0.5
TMEM170		mmu-miR-181c(1)//mmu-miR-181d(1)	mmu-miR-181c-5p(1)//mmu-miR-181d-5p(1)			miR-181c-5p(1)//miR-181d-5p(1)	0.5	NA	NA	NA	NA	0	0.5
TMEM185B		mmu-miR-181c(1)//mmu-miR-181d(1)		mmu-miR-181c(1)//mmu-miR-181d(1)		miR-181c-5p(1)//miR-181d-5p(1)	0.5	NA	NA	NA	NA	0	0.5
TMEM55A		mmu-miR-181c(1)//mmu-miR-181d(1)	mmu-miR-181c-5p(1)//mmu-miR-181d-5p(1)			miR-181c-5p(1)//miR-181d-5p(1)	0.5	NA	NA	NA	NA	0	0.5
TMPRSS2		mmu-miR-181c(1)//mmu-miR-181d(1)	mmu-miR-181c-5p(1)//mmu-miR-181d-5p(1)			miR-181c-5p(1)//miR-181d-5p(1)	0.5	NA	NA	NA	NA	0	0.5
TMX4		mmu-miR-181c(1)//mmu-miR-181d(2)	mmu-miR-181c-5p(1)//mmu-miR-181d-5p(1)			miR-181c-5p(1)//miR-181d-5p(1)	0.5	NA	NA	NA	NA	0	0.5
TNFSF10		mmu-miR-181c(2)//mmu-miR-181d(2)	mmu-miR-181c-5p(1)//mmu-miR-181d-5p(1)			miR-181c-5p(1)//miR-181d-5p(1)	0.5	NA	NA	NA	NA	0	0.5
TNPO3		mmu-miR-181c(1)//mmu-miR-181d(2)	mmu-miR-181c-5p(1)//mmu-miR-181d-5p(1)			miR-181c-5p(1)//miR-181d-5p(1)	0.5	NA	NA	NA	NA	0	0.5
TNRC18		mmu-miR-181c(1)//mmu-miR-181d(1)		mmu-miR-181c(1)//mmu-miR-181d(1)		miR-181c-5p(1)//miR-181d-5p(1)	0.5	NA	NA	NA	NA	0	0.5
TOMM70A		mmu-miR-181c(1)//mmu-miR-181d(1)	mmu-miR-181c-5p(1)//mmu-miR-181d-5p(1)			miR-181c-5p(1)//miR-181d-5p(1)	0.5	NA	NA	NA	NA	0	0.5
TOPBP1		mmu-miR-181c(1)//mmu-miR-181d(1)	mmu-miR-181c-5p(1)//mmu-miR-181d-5p(1)			miR-181c-5p(1)//miR-181d-5p(1)	0.5	NA	NA	NA	NA	0	0.5
TOR1AIP2		mmu-miR-181c(1)//mmu-miR-181d(1)	mmu-miR-181c-5p(2)//mmu-miR-181d-5p(2)			miR-181c-5p(1)//miR-181d-5p(1)	0.5	NA	NA	NA	NA	0	0.5
TPD52		mmu-miR-181c(1)//mmu-miR-181d(1)	mmu-miR-181c-5p(1)//mmu-miR-181d-5p(1)			miR-181c-5p(1)//miR-181d-5p(1)	0.5	NA	NA	NA	NA	0	0.5
TRAF6		mmu-miR-181c(2)//mmu-miR-181d(2)	mmu-miR-181c-5p(1)//mmu-miR-181d-5p(1)			miR-181c-5p(1)//miR-181d-5p(1)	0.5	NA	NA	NA	NA	0	0.5
TRANK1	mmu-miR-181c-5p(1)//mmu-miR-181d-5p(1)		mmu-miR-181c-5p(1)//mmu-miR-181d-5p(1)			miR-181c-5p(1)//miR-181d-5p(1)	0.5	NA	NA	NA	NA	0	0.5
TRIM36		mmu-miR-181c(1)//mmu-miR-181d(2)	mmu-miR-181c-5p(1)//mmu-miR-181d-5p(1)			miR-181c-5p(1)//miR-181d-5p(1)	0.5	NA	NA	NA	NA	0	0.5
TRIM44		mmu-miR-181c(2)//mmu-miR-181d(2)	mmu-miR-181c-5p(1)//mmu-miR-181d-5p(1)			miR-181c-5p(1)//miR-181d-5p(1)	0.5	NA	NA	NA	NA	0	0.5
TRIP4	mmu-miR-181c-5p(1)//mmu-miR-181d-5p(1)		mmu-miR-181c-5p(1)//mmu-miR-181d-5p(1)			miR-181c-5p(1)//miR-181d-5p(1)	0.5	NA	NA	NA	NA	0	0.5
TRPC3		mmu-miR-181c(1)//mmu-miR-181d(1)		mmu-miR-181c(1)//mmu-miR-181d(1)		miR-181c-5p(1)//miR-181d-5p(1)	0.5	NA	NA	NA	NA	0	0.5
TSPAN2		mmu-miR-181c(1)//mmu-miR-181d(1)	mmu-miR-181c-5p(1)//mmu-miR-181d-5p(1)			miR-181c-5p(1)//miR-181d-5p(1)	0.5	NA	NA	NA	NA	0	0.5
TSR1		mmu-miR-181c(1)//mmu-miR-181d(1)	mmu-miR-181c-5p(1)//mmu-miR-181d-5p(1)			miR-181c-5p(1)//miR-181d-5p(1)	0.5	NA	NA	NA	NA	0	0.5
TTBK1	mmu-miR-181c-5p(1)//mmu-miR-181d-5p(1)		mmu-miR-181c-5p(1)//mmu-miR-181d-5p(1)			miR-181c-5p(1)//miR-181d-5p(1)	0.5	NA	NA	NA	NA	0	0.5
TTC39A	mmu-miR-181c-5p(1)//mmu-miR-181d-5p(1)	mmu-miR-181c(1)//mmu-miR-181d(1)				miR-181c-5p(1)//miR-181d-5p(1)	0.5	NA	NA	NA	NA	0	0.5
TTL	mmu-miR-181c-5p(1)//mmu-miR-181d-5p(1)		mmu-miR-181c-5p(1)//mmu-miR-181d-5p(1)			miR-181c-5p(1)//miR-181d-5p(1)	0.5	NA	NA	NA	NA	0	0.5
TTPA		mmu-miR-181c(3)//mmu-miR-181d(3)	mmu-miR-181c-5p(1)//mmu-miR-181d-5p(1)			miR-181c-5p(1)//miR-181d-5p(1)	0.5	NA	NA	NA	NA	0	0.5
TTPAL	mmu-miR-181c-5p(1)//mmu-miR-181d-5p(1)	mmu-miR-181c(1)//mmu-miR-181d(1)				miR-181c-5p(1)//miR-181d-5p(1)	0.5	NA	NA	NA	NA	0	0.5
TWIST1		mmu-miR-181c(1)//mmu-miR-181d(1)	mmu-miR-181c-5p(1)//mmu-miR-181d-5p(1)			miR-181c-5p(1)//miR-181d-5p(1)	0.5	NA	NA	NA	NA	0	0.5
UBE2K		mmu-miR-181c(1)//mmu-miR-181d(1)	mmu-miR-181c-5p(1)//mmu-miR-181d-5p(1)			miR-181c-5p(1)//miR-181d-5p(1)	0.5	NA	NA	NA	NA	0	0.5
UBIAD1		mmu-miR-181c(1)//mmu-miR-181d(1)	mmu-miR-181c-5p(1)//mmu-miR-181d-5p(1)			miR-181c-5p(1)//miR-181d-5p(1)	0.5	NA	NA	NA	NA	0	0.5
UGT8A		mmu-miR-181c(2)//mmu-miR-181d(2)	mmu-miR-181c-5p(1)//mmu-miR-181d-5p(1)			miR-181c-5p(1)//miR-181d-5p(1)	0.5	NA	NA	NA	NA	0	0.5
UHRF2		mmu-miR-181c(2)//mmu-miR-181d(3)	mmu-miR-181c-5p(1)//mmu-miR-181d-5p(1)			miR-181c-5p(1)//miR-181d-5p(1)	0.5	NA	NA	NA	NA	0	0.5
ULK3		mmu-miR-181c(1)//mmu-miR-181d(1)	mmu-miR-181c-5p(1)//mmu-miR-181d-5p(1)			miR-181c-5p(1)//miR-181d-5p(1)	0.5	NA	NA	NA	NA	0	0.5
UNC5D	mmu-miR-181c-5p(1)//mmu-miR-181d-5p(1)		mmu-miR-181c-5p(1)//mmu-miR-181d-5p(1)			miR-181c-5p(1)//miR-181d-5p(1)	0.5	NA	NA	NA	NA	0	0.5
USP38		mmu-miR-181c(1)//mmu-miR-181d(1)		mmu-miR-181c(1)//mmu-miR-181d(1)		miR-181c-5p(1)//miR-181d-5p(1)	0.5	NA	NA	NA	NA	0	0.5
USP45		mmu-miR-181c(1)//mmu-miR-181d(5)	mmu-miR-181c-5p(1)//mmu-miR-181d-5p(1)			miR-181c-5p(1)//miR-181d-5p(1)	0.5	NA	NA	NA	NA	0	0.5
USP46		mmu-miR-181c(1)//mmu-miR-181d(1)	mmu-miR-181c-5p(1)//mmu-miR-181d-5p(1)			miR-181c-5p(1)//miR-181d-5p(1)	0.5	NA	NA	NA	NA	0	0.5
UTP23		mmu-miR-181c(3)//mmu-miR-181d(3)	mmu-miR-181c-5p(1)//mmu-miR-181d-5p(1)			miR-181c-5p(1)//miR-181d-5p(1)	0.5	NA	NA	NA	NA	0	0.5
VAMP1	mmu-miR-181c-5p(1)//mmu-miR-181d-5p(1)		mmu-miR-181c-5p(1)//mmu-miR-181d-5p(1)			miR-181c-5p(1)//miR-181d-5p(1)	0.5	NA	NA	NA	NA	0	0.5
VAPB	mmu-miR-181c-5p(1)//mmu-miR-181d-5p(1)		mmu-miR-181c-5p(1)//mmu-miR-181d-5p(1)			miR-181c-5p(1)//miR-181d-5p(1)	0.5	NA	NA	NA	NA	0	0.5
VCPIP1		mmu-miR-181c(1)//mmu-miR-181d(1)	mmu-miR-181c-5p(1)//mmu-miR-181d-5p(1)			miR-181c-5p(1)//miR-181d-5p(1)	0.5	NA	NA	NA	NA	0	0.5
VHL		mmu-miR-181c(1)//mmu-miR-181d(1)	mmu-miR-181c-5p(1)//mmu-miR-181d-5p(1)			miR-181c-5p(1)//miR-181d-5p(1)	0.5	NA	NA	NA	NA	0	0.5
VPS13C		mmu-miR-181c(1)//mmu-miR-181d(2)	mmu-miR-181c-5p(1)//mmu-miR-181d-5p(1)			miR-181c-5p(1)//miR-181d-5p(1)	0.5	NA	NA	NA	NA	0	0.5
VRK3		mmu-miR-181c(3)//mmu-miR-181d(3)	mmu-miR-181c-5p(1)//mmu-miR-181d-5p(1)			miR-181c-5p(1)//miR-181d-5p(1)	0.5	NA	NA	NA	NA	0	0.5
VSNL1		mmu-miR-181c(2)//mmu-miR-181d(4)	mmu-miR-181c-5p(1)//mmu-miR-181d-5p(1)			miR-181c-5p(1)//miR-181d-5p(1)	0.5	NA	NA	NA	NA	0	0.5
WDR41		mmu-miR-181c(1)//mmu-miR-181d(1)	mmu-miR-181c-5p(1)//mmu-miR-181d-5p(1)			miR-181c-5p(1)//miR-181d-5p(1)	0.5	NA	NA	NA	NA	0	0.5
WDR77		mmu-miR-181c(1)//mmu-miR-181d(1)	mmu-miR-181c-5p(1)//mmu-miR-181d-5p(1)			miR-181c-5p(1)//miR-181d-5p(1)	0.5	NA	NA	NA	NA	0	0.5
WISP1		mmu-miR-181c(1)//mmu-miR-181d(1)	mmu-miR-181c-5p(1)//mmu-miR-181d-5p(1)			miR-181c-5p(1)//miR-181d-5p(1)	0.5	NA	NA	NA	NA	0	0.5
XPNPEP3		mmu-miR-181c(1)//mmu-miR-181d(2)	mmu-miR-181c-5p(1)//mmu-miR-181d-5p(1)			miR-181c-5p(1)//miR-181d-5p(1)	0.5	NA	NA	NA	NA	0	0.5
YIPF6		mmu-miR-181c(2)//mmu-miR-181d(2)	mmu-miR-181c-5p(1)//mmu-miR-181d-5p(1)			miR-181c-5p(1)//miR-181d-5p(1)	0.5	NA	NA	NA	NA	0	0.5
ZBTB24		mmu-miR-181c(1)//mmu-miR-181d(1)	mmu-miR-181c-5p(1)//mmu-miR-181d-5p(1)			miR-181c-5p(1)//miR-181d-5p(1)	0.5	NA	NA	NA	NA	0	0.5
ZC3H7B			mmu-miR-181c-5p(1)//mmu-miR-181d-5p(1)	mmu-miR-181c(1)//mmu-miR-181d(1)		miR-181c-5p(1)//miR-181d-5p(1)	0.5	NA	NA	NA	NA	0	0.5
ZCCHC18		mmu-miR-181c(1)//mmu-miR-181d(1)	mmu-miR-181c-5p(1)//mmu-miR-181d-5p(1)			miR-181c-5p(1)//miR-181d-5p(1)	0.5	NA	NA	NA	NA	0	0.5
ZFC3H1		mmu-miR-181c(3)//mmu-miR-181d(3)	mmu-miR-181c-5p(1)//mmu-miR-181d-5p(1)			miR-181c-5p(1)//miR-181d-5p(1)	0.5	NA	NA	NA	NA	0	0.5
ZFP14	mmu-miR-181c-5p(1)//mmu-miR-181d-5p(1)	mmu-miR-181c(3)//mmu-miR-181d(3)				miR-181c-5p(1)//miR-181d-5p(1)	0.5	NA	NA	NA	NA	0	0.5
ZFP148		mmu-miR-181c(1)//mmu-miR-181d(1)	mmu-miR-181c-5p(1)//mmu-miR-181d-5p(1)			miR-181c-5p(1)//miR-181d-5p(1)	0.5	NA	NA	NA	NA	0	0.5
ZFP157		mmu-miR-181c(1)//mmu-miR-181d(2)	mmu-miR-181c-5p(1)//mmu-miR-181d-5p(1)			miR-181c-5p(1)//miR-181d-5p(1)	0.5	NA	NA	NA	NA	0	0.5
ZFP180		mmu-miR-181c(1)//mmu-miR-181d(1)	mmu-miR-181c-5p(1)//mmu-miR-181d-5p(1)			miR-181c-5p(1)//miR-181d-5p(1)	0.5	NA	NA	NA	NA	0	0.5
ZFP248		mmu-miR-181c(1)//mmu-miR-181d(1)	mmu-miR-181c-5p(1)//mmu-miR-181d-5p(1)			miR-181c-5p(1)//miR-181d-5p(1)	0.5	NA	NA	NA	NA	0	0.5
ZFP37		mmu-miR-181c(1)//mmu-miR-181d(1)	mmu-miR-181c-5p(1)//mmu-miR-181d-5p(1)			miR-181c-5p(1)//miR-181d-5p(1)	0.5	NA	NA	NA	NA	0	0.5
ZFP442	mmu-miR-181c-5p(1)//mmu-miR-181d-5p(1)		mmu-miR-181c-5p(1)//mmu-miR-181d-5p(1)			miR-181c-5p(1)//miR-181d-5p(1)	0.5	NA	NA	NA	NA	0	0.5
ZFP512		mmu-miR-181c(1)//mmu-miR-181d(1)		mmu-miR-181c(1)//mmu-miR-181d(1)		miR-181c-5p(1)//miR-181d-5p(1)	0.5	NA	NA	NA	NA	0	0.5
ZFP518B		mmu-miR-181c(2)//mmu-miR-181d(2)	mmu-miR-181c-5p(1)//mmu-miR-181d-5p(1)			miR-181c-5p(1)//miR-181d-5p(1)	0.5	NA	NA	NA	NA	0	0.5
ZFP618	mmu-miR-181c-5p(2)//mmu-miR-181d-5p(2)		mmu-miR-181c-5p(1)//mmu-miR-181d-5p(1)			miR-181c-5p(1)//miR-181d-5p(1)	0.5	NA	NA	NA	NA	0	0.5
ZFP655	mmu-miR-181c-5p(1)//mmu-miR-181d-5p(1)		mmu-miR-181c-5p(1)//mmu-miR-181d-5p(1)			miR-181c-5p(1)//miR-181d-5p(1)	0.5	NA	NA	NA	NA	0	0.5
ZFP715		mmu-miR-181c(1)//mmu-miR-181d(1)	mmu-miR-181c-5p(1)//mmu-miR-181d-5p(1)			miR-181c-5p(1)//miR-181d-5p(1)	0.5	NA	NA	NA	NA	0	0.5
ZFP780B	mmu-miR-181c-5p(1)//mmu-miR-181d-5p(1)	mmu-miR-181c(1)//mmu-miR-181d(2)				miR-181c-5p(1)//miR-181d-5p(1)	0.5	NA	NA	NA	NA	0	0.5
ZFP810		mmu-miR-181c(1)//mmu-miR-181d(1)	mmu-miR-181c-5p(1)//mmu-miR-181d-5p(1)			miR-181c-5p(1)//miR-181d-5p(1)	0.5	NA	NA	NA	NA	0	0.5
ZFP868		mmu-miR-181c(1)//mmu-miR-181d(1)	mmu-miR-181c-5p(1)//mmu-miR-181d-5p(1)			miR-181c-5p(1)//miR-181d-5p(1)	0.5	NA	NA	NA	NA	0	0.5
ZFP870		mmu-miR-181c(1)//mmu-miR-181d(1)	mmu-miR-181c-5p(1)//mmu-miR-181d-5p(1)			miR-181c-5p(1)//miR-181d-5p(1)	0.5	NA	NA	NA	NA	0	0.5
ZFP90		mmu-miR-181c(3)//mmu-miR-181d(1)	mmu-miR-181c-5p(1)//mmu-miR-181d-5p(1)			miR-181c-5p(1)//miR-181d-5p(1)	0.5	NA	NA	NA	NA	0	0.5
ZFP960	mmu-miR-181c-5p(2)//mmu-miR-181d-5p(2)		mmu-miR-181c-5p(1)//mmu-miR-181d-5p(1)			miR-181c-5p(1)//miR-181d-5p(1)	0.5	NA	NA	NA	NA	0	0.5
ZFYVE16		mmu-miR-181c(1)//mmu-miR-181d(1)	mmu-miR-181c-5p(1)//mmu-miR-181d-5p(1)			miR-181c-5p(1)//miR-181d-5p(1)	0.5	NA	NA	NA	NA	0	0.5
ZKSCAN17		mmu-miR-181c(1)//mmu-miR-181d(1)	mmu-miR-181c-5p(1)//mmu-miR-181d-5p(1)			miR-181c-5p(1)//miR-181d-5p(1)	0.5	NA	NA	NA	NA	0	0.5
ZRANB1		mmu-miR-181c(1)//mmu-miR-181d(2)	mmu-miR-181c-5p(1)//mmu-miR-181d-5p(1)			miR-181c-5p(1)//miR-181d-5p(1)	0.5	NA	NA	NA	NA	0	0.5
ARL6IP6		mmu-miR-181d(2)			miR-181c-5p(1)//miR-181d-5p(1)	miR-181c-5p(1)//miR-181d-5p(1)	0.475	NA	NA	NA	NA	0	0.475
BLOC1S2		mmu-miR-181d(1)			miR-181c-5p(1)//miR-181d-5p(1)	miR-181c-5p(1)//miR-181d-5p(1)	0.475	NA	NA	NA	NA	0	0.475
CCNT2			mmu-miR-181d-5p(1)		miR-181c-5p(1)//miR-181d-5p(1)	miR-181c-5p(1)//miR-181d-5p(1)	0.475	NA	NA	NA	NA	0	0.475
COPA		mmu-miR-181d(1)			miR-181c-5p(1)//miR-181d-5p(1)	miR-181c-5p(1)//miR-181d-5p(1)	0.475	NA	NA	NA	NA	0	0.475
FASTKD5			mmu-miR-181c-5p(1)		miR-181c-5p(1)//miR-181d-5p(1)	miR-181c-5p(1)//miR-181d-5p(1)	0.475	NA	NA	NA	NA	0	0.475
GATC		mmu-miR-181c(1)			miR-181c-5p(1)//miR-181d-5p(1)	miR-181c-5p(1)//miR-181d-5p(1)	0.475	NA	NA	NA	NA	0	0.475
IKBIP		mmu-miR-181c(1)			miR-181c-5p(1)//miR-181d-5p(1)	miR-181c-5p(1)//miR-181d-5p(1)	0.475	NA	NA	NA	NA	0	0.475
MED13			mmu-miR-181d-5p(1)		miR-181c-5p(1)//miR-181d-5p(1)	miR-181c-5p(1)//miR-181d-5p(1)	0.475	NA	NA	NA	NA	0	0.475
NAA25			mmu-miR-181d-5p(1)		miR-181c-5p(1)//miR-181d-5p(1)	miR-181c-5p(1)//miR-181d-5p(1)	0.475	NA	NA	NA	NA	0	0.475
NBN			mmu-miR-181d-5p(1)		miR-181c-5p(1)//miR-181d-5p(1)	miR-181c-5p(1)//miR-181d-5p(1)	0.475	NA	NA	NA	NA	0	0.475
PPP1R3B			mmu-miR-181d-5p(1)		miR-181c-5p(1)//miR-181d-5p(1)	miR-181c-5p(1)//miR-181d-5p(1)	0.475	NA	NA	NA	NA	0	0.475
RASA1			mmu-miR-181c-5p(1)		miR-181c-5p(1)//miR-181d-5p(1)	miR-181c-5p(1)//miR-181d-5p(1)	0.475	NA	NA	NA	NA	0	0.475
RCOR3			mmu-miR-181c-5p(1)		miR-181c-5p(1)//miR-181d-5p(1)	miR-181c-5p(1)//miR-181d-5p(1)	0.475	NA	NA	NA	NA	0	0.475
RSPRY1		mmu-miR-181d(1)			miR-181c-5p(1)//miR-181d-5p(1)	miR-181c-5p(1)//miR-181d-5p(1)	0.475	NA	NA	NA	NA	0	0.475
SEC16A			mmu-miR-181c-5p(1)		miR-181c-5p(1)//miR-181d-5p(1)	miR-181c-5p(1)//miR-181d-5p(1)	0.475	NA	NA	NA	NA	0	0.475
SSR3			mmu-miR-181c-5p(1)		miR-181c-5p(1)//miR-181d-5p(1)	miR-181c-5p(1)//miR-181d-5p(1)	0.475	NA	NA	NA	NA	0	0.475
TMEM184C			mmu-miR-181c-5p(1)		miR-181c-5p(1)//miR-181d-5p(1)	miR-181c-5p(1)//miR-181d-5p(1)	0.475	NA	NA	NA	NA	0	0.475
UHMK1			mmu-miR-181c-5p(1)		miR-181c-5p(1)//miR-181d-5p(1)	miR-181c-5p(1)//miR-181d-5p(1)	0.475	NA	NA	NA	NA	0	0.475
1110012J17RIK		mmu-miR-181c(2)//mmu-miR-181d(4)	mmu-miR-181c-5p(1)//mmu-miR-181d-5p(1)	mmu-miR-181c(1)//mmu-miR-181d(1)			0.45	NA	NA	NA	NA	0	0.45
1300001I01RIK		mmu-miR-181c(1)//mmu-miR-181d(1)	mmu-miR-181c-5p(1)//mmu-miR-181d-5p(1)	mmu-miR-181c(1)//mmu-miR-181d(1)			0.45	NA	NA	NA	NA	0	0.45
1600021P15RIK		mmu-miR-181c(1)//mmu-miR-181d(1)	mmu-miR-181c-5p(1)//mmu-miR-181d-5p(1)	mmu-miR-181c(1)//mmu-miR-181d(1)			0.45	NA	NA	NA	NA	0	0.45
1700021K19RIK	mmu-miR-181c-5p(1)//mmu-miR-181d-5p(1)	mmu-miR-181c(2)//mmu-miR-181d(2)	mmu-miR-181c-5p(1)//mmu-miR-181d-5p(1)				0.45	NA	NA	NA	NA	0	0.45
1700066M21RIK	mmu-miR-181c-5p(1)//mmu-miR-181d-5p(1)	mmu-miR-181c(1)//mmu-miR-181d(1)	mmu-miR-181c-5p(1)//mmu-miR-181d-5p(1)				0.45	NA	NA	NA	NA	0	0.45
1810011O10RIK	mmu-miR-181c-5p(1)//mmu-miR-181d-5p(1)	mmu-miR-181c(1)//mmu-miR-181d(2)	mmu-miR-181c-5p(1)//mmu-miR-181d-5p(1)				0.45	NA	NA	NA	NA	0	0.45
2210418O10RIK	mmu-miR-181c-5p(3)//mmu-miR-181d-5p(3)	mmu-miR-181c(1)//mmu-miR-181d(1)	mmu-miR-181c-5p(1)//mmu-miR-181d-5p(1)				0.45	NA	NA	NA	NA	0	0.45
2410002O22RIK		mmu-miR-181c(3)//mmu-miR-181d(3)	mmu-miR-181c-5p(1)//mmu-miR-181d-5p(1)	mmu-miR-181c(1)//mmu-miR-181d(1)			0.45	NA	NA	NA	NA	0	0.45
2410042D21RIK		mmu-miR-181c(2)//mmu-miR-181d(1)	mmu-miR-181c-5p(1)//mmu-miR-181d-5p(1)	mmu-miR-181c(1)//mmu-miR-181d(1)			0.45	NA	NA	NA	NA	0	0.45
2410066E13RIK		mmu-miR-181c(1)//mmu-miR-181d(1)	mmu-miR-181c-5p(1)//mmu-miR-181d-5p(1)	mmu-miR-181c(1)//mmu-miR-181d(1)			0.45	NA	NA	NA	NA	0	0.45
2610305D13RIK		mmu-miR-181c(2)//mmu-miR-181d(2)	mmu-miR-181c-5p(1)//mmu-miR-181d-5p(1)	mmu-miR-181c(1)//mmu-miR-181d(1)			0.45	NA	NA	NA	NA	0	0.45
2810046L04RIK		mmu-miR-181c(1)//mmu-miR-181d(1)	mmu-miR-181c-5p(1)//mmu-miR-181d-5p(1)	mmu-miR-181c(1)//mmu-miR-181d(1)			0.45	NA	NA	NA	NA	0	0.45
4933433P14RIK		mmu-miR-181c(2)//mmu-miR-181d(2)	mmu-miR-181c-5p(1)//mmu-miR-181d-5p(1)	mmu-miR-181c(2)//mmu-miR-181d(2)			0.45	NA	NA	NA	NA	0	0.45
5730419I09RIK		mmu-miR-181c(1)//mmu-miR-181d(1)	mmu-miR-181c-5p(1)//mmu-miR-181d-5p(1)	mmu-miR-181c(1)//mmu-miR-181d(1)			0.45	NA	NA	NA	NA	0	0.45
5730507C01RIK	mmu-miR-181c-5p(1)//mmu-miR-181d-5p(1)	mmu-miR-181c(4)//mmu-miR-181d(4)		mmu-miR-181c(2)//mmu-miR-181d(2)			0.45	NA	NA	NA	NA	0	0.45
5730528L13RIK		mmu-miR-181c(2)//mmu-miR-181d(2)	mmu-miR-181c-5p(1)//mmu-miR-181d-5p(1)	mmu-miR-181c(1)//mmu-miR-181d(1)			0.45	NA	NA	NA	NA	0	0.45
6430527G18RIK		mmu-miR-181c(1)//mmu-miR-181d(2)	mmu-miR-181c-5p(1)//mmu-miR-181d-5p(1)	mmu-miR-181c(1)//mmu-miR-181d(1)			0.45	NA	NA	NA	NA	0	0.45
9430020K01RIK		mmu-miR-181c(1)//mmu-miR-181d(1)	mmu-miR-181c-5p(1)//mmu-miR-181d-5p(1)	mmu-miR-181c(1)//mmu-miR-181d(1)			0.45	NA	NA	NA	NA	0	0.45
A930001N09RIK		mmu-miR-181c(2)//mmu-miR-181d(2)	mmu-miR-181c-5p(1)//mmu-miR-181d-5p(1)	mmu-miR-181c(2)//mmu-miR-181d(2)			0.45	NA	NA	NA	NA	0	0.45
ADAMTS18	mmu-miR-181c-5p(1)//mmu-miR-181d-5p(1)	mmu-miR-181c(1)//mmu-miR-181d(1)	mmu-miR-181c-5p(1)//mmu-miR-181d-5p(1)				0.45	NA	NA	NA	NA	0	0.45
ADCY9	mmu-miR-181c-5p(2)//mmu-miR-181d-5p(2)				miR-181c-5p(1)	miR-181c-5p(1)//miR-181d-5p(1)	0.45	NA	NA	NA	NA	0	0.45
ADHFE1	mmu-miR-181c-5p(1)//mmu-miR-181d-5p(1)	mmu-miR-181c(2)//mmu-miR-181d(2)	mmu-miR-181c-5p(1)//mmu-miR-181d-5p(1)				0.45	NA	NA	NA	NA	0	0.45
AMD1			mmu-miR-181c-5p(1)//mmu-miR-181d-5p(1)		miR-181c-5p(1)	miR-181c-5p(1)//miR-181d-5p(1)	0.45	NA	NA	NA	NA	0	0.45
ANGEL2			mmu-miR-181c-5p(1)//mmu-miR-181d-5p(1)		miR-181d-5p(1)	miR-181c-5p(1)//miR-181d-5p(1)	0.45	NA	NA	NA	NA	0	0.45
APCDD1		mmu-miR-181c(1)//mmu-miR-181d(1)	mmu-miR-181c-5p(1)//mmu-miR-181d-5p(1)	mmu-miR-181c(1)//mmu-miR-181d(1)			0.45	NA	NA	NA	NA	0	0.45
ARL6IP1		mmu-miR-181d(1)	mmu-miR-181d-5p(1)		miR-181c-5p(1)	miR-181c-5p(1)//miR-181d-5p(1)	0.45	NA	NA	NA	NA	0	0.45
ARRB2		mmu-miR-181c(1)//mmu-miR-181d(1)			miR-181c-5p(1)	miR-181c-5p(1)//miR-181d-5p(1)	0.45	NA	NA	NA	NA	0	0.45
ARV1		mmu-miR-181c(1)//mmu-miR-181d(1)			miR-181c-5p(1)	miR-181c-5p(1)//miR-181d-5p(1)	0.45	NA	NA	NA	NA	0	0.45
ATP2C1		mmu-miR-181c(1)//mmu-miR-181d(1)	mmu-miR-181c-5p(1)//mmu-miR-181d-5p(1)	mmu-miR-181c(1)//mmu-miR-181d(1)			0.45	NA	NA	NA	NA	0	0.45
B230307C23RIK	mmu-miR-181c-5p(4)//mmu-miR-181d-5p(4)	mmu-miR-181c(1)//mmu-miR-181d(1)	mmu-miR-181c-5p(1)//mmu-miR-181d-5p(1)				0.45	NA	NA	NA	NA	0	0.45
BC017612		mmu-miR-181c(2)//mmu-miR-181d(2)	mmu-miR-181c-5p(1)//mmu-miR-181d-5p(1)	mmu-miR-181c(1)//mmu-miR-181d(1)			0.45	NA	NA	NA	NA	0	0.45
BMP2K		mmu-miR-181c(2)//mmu-miR-181d(2)			miR-181c-5p(1)	miR-181c-5p(1)//miR-181d-5p(1)	0.45	NA	NA	NA	NA	0	0.45
BMP3	mmu-miR-181c-5p(1)//mmu-miR-181d-5p(1)	mmu-miR-181c(1)//mmu-miR-181d(1)	mmu-miR-181c-5p(1)//mmu-miR-181d-5p(1)				0.45	NA	NA	NA	NA	0	0.45
BMPR2	mmu-miR-181c-5p(1)//mmu-miR-181d-5p(1)				miR-181c-5p(1)	miR-181c-5p(1)//miR-181d-5p(1)	0.45	NA	NA	NA	NA	0	0.45
BTF3L4			mmu-miR-181c-5p(1)//mmu-miR-181d-5p(1)		miR-181d-5p(1)	miR-181c-5p(1)//miR-181d-5p(1)	0.45	NA	NA	NA	NA	0	0.45
CALCA		mmu-miR-181c(1)//mmu-miR-181d(1)	mmu-miR-181c-5p(1)//mmu-miR-181d-5p(1)	mmu-miR-181c(1)//mmu-miR-181d(1)			0.45	NA	NA	NA	NA	0	0.45
CALM3			mmu-miR-181c-5p(1)//mmu-miR-181d-5p(1)		miR-181d-5p(1)	miR-181c-5p(1)//miR-181d-5p(1)	0.45	NA	NA	NA	NA	0	0.45
CCDC132	mmu-miR-181c-5p(1)//mmu-miR-181d-5p(1)	mmu-miR-181c(1)//mmu-miR-181d(1)	mmu-miR-181c-5p(1)//mmu-miR-181d-5p(1)				0.45	NA	NA	NA	NA	0	0.45
CCDC14		mmu-miR-181c(2)//mmu-miR-181d(2)			miR-181c-5p(1)	miR-181c-5p(1)//miR-181d-5p(1)	0.45	NA	NA	NA	NA	0	0.45
CD28			mmu-miR-181c-5p(1)//mmu-miR-181d-5p(1)		miR-181d-5p(1)	miR-181c-5p(1)//miR-181d-5p(1)	0.45	NA	NA	NA	NA	0	0.45
CEBPB			mmu-miR-181c-5p(1)//mmu-miR-181d-5p(1)		miR-181d-5p(1)	miR-181c-5p(1)//miR-181d-5p(1)	0.45	NA	NA	NA	NA	0	0.45
CELF2			mmu-miR-181c-5p(1)//mmu-miR-181d-5p(1)		miR-181d-5p(1)	miR-181c-5p(1)//miR-181d-5p(1)	0.45	NA	NA	NA	NA	0	0.45
CEP76	mmu-miR-181c-5p(1)//mmu-miR-181d-5p(1)	mmu-miR-181c(2)//mmu-miR-181d(2)	mmu-miR-181c-5p(1)//mmu-miR-181d-5p(1)				0.45	NA	NA	NA	NA	0	0.45
CHD1			mmu-miR-181c-5p(1)//mmu-miR-181d-5p(1)		miR-181c-5p(1)	miR-181c-5p(1)//miR-181d-5p(1)	0.45	NA	NA	NA	NA	0	0.45
CLCC1		mmu-miR-181c(1)//mmu-miR-181d(1)			miR-181c-5p(1)	miR-181c-5p(1)//miR-181d-5p(1)	0.45	NA	NA	NA	NA	0	0.45
CLCN3		mmu-miR-181c(1)//mmu-miR-181d(4)			miR-181c-5p(1)	miR-181c-5p(1)//miR-181d-5p(1)	0.45	NA	NA	NA	NA	0	0.45
CMPK2	mmu-miR-181c-5p(1)//mmu-miR-181d-5p(1)	mmu-miR-181c(1)//mmu-miR-181d(1)	mmu-miR-181c-5p(1)//mmu-miR-181d-5p(1)				0.45	NA	NA	NA	NA	0	0.45
CRY1		mmu-miR-181c(1)//mmu-miR-181d(1)	mmu-miR-181c-5p(1)//mmu-miR-181d-5p(1)	mmu-miR-181c(1)//mmu-miR-181d(1)			0.45	NA	NA	NA	NA	0	0.45
CSNK1D			mmu-miR-181c-5p(1)//mmu-miR-181d-5p(1)		miR-181c-5p(1)	miR-181c-5p(1)//miR-181d-5p(1)	0.45	NA	NA	NA	NA	0	0.45
DCP1A			mmu-miR-181c-5p(1)//mmu-miR-181d-5p(1)		miR-181c-5p(1)	miR-181c-5p(1)//miR-181d-5p(1)	0.45	NA	NA	NA	NA	0	0.45
DDX17		mmu-miR-181c(2)//mmu-miR-181d(1)			miR-181c-5p(1)	miR-181c-5p(1)//miR-181d-5p(1)	0.45	NA	NA	NA	NA	0	0.45
DDX6			mmu-miR-181c-5p(1)//mmu-miR-181d-5p(1)		miR-181c-5p(1)//miR-181d-5p(1)	miR-181d-5p(1)	0.45	NA	NA	NA	NA	0	0.45
DNAJB14			mmu-miR-181c-5p(1)//mmu-miR-181d-5p(1)		miR-181d-5p(1)	miR-181c-5p(1)//miR-181d-5p(1)	0.45	NA	NA	NA	NA	0	0.45
DNAJC6			mmu-miR-181c-5p(1)//mmu-miR-181d-5p(1)		miR-181c-5p(1)	miR-181c-5p(1)//miR-181d-5p(1)	0.45	NA	NA	NA	NA	0	0.45
DPP8		mmu-miR-181c(1)//mmu-miR-181d(1)	mmu-miR-181c-5p(1)//mmu-miR-181d-5p(1)	mmu-miR-181c(1)//mmu-miR-181d(1)			0.45	NA	NA	NA	NA	0	0.45
DSG3		mmu-miR-181c(1)//mmu-miR-181d(1)	mmu-miR-181c-5p(1)//mmu-miR-181d-5p(1)	mmu-miR-181c(1)//mmu-miR-181d(1)			0.45	NA	NA	NA	NA	0	0.45
EID1		mmu-miR-181c(1)//mmu-miR-181d(1)			miR-181d-5p(1)	miR-181c-5p(1)//miR-181d-5p(1)	0.45	NA	NA	NA	NA	0	0.45
EIF1		mmu-miR-181d(1)	mmu-miR-181d-5p(1)		miR-181c-5p(1)	miR-181c-5p(1)//miR-181d-5p(1)	0.45	NA	NA	NA	NA	0	0.45
EIF2S1	mmu-miR-181c-5p(1)//mmu-miR-181d-5p(1)	mmu-miR-181c(1)//mmu-miR-181d(1)	mmu-miR-181c-5p(1)//mmu-miR-181d-5p(1)				0.45	NA	NA	NA	NA	0	0.45
ERH	mmu-miR-181c-5p(1)//mmu-miR-181d-5p(1)	mmu-miR-181c(1)//mmu-miR-181d(1)	mmu-miR-181c-5p(1)//mmu-miR-181d-5p(1)				0.45	NA	NA	NA	NA	0	0.45
ETL4	mmu-miR-181c-5p(1)//mmu-miR-181d-5p(1)	mmu-miR-181c(2)//mmu-miR-181d(2)	mmu-miR-181c-5p(1)//mmu-miR-181d-5p(1)				0.45	NA	NA	NA	NA	0	0.45
FAM135A			mmu-miR-181c-5p(1)//mmu-miR-181d-5p(1)		miR-181d-5p(1)	miR-181c-5p(1)//miR-181d-5p(1)	0.45	NA	NA	NA	NA	0	0.45
FAM178A	mmu-miR-181c-5p(1)//mmu-miR-181d-5p(1)	mmu-miR-181c(1)//mmu-miR-181d(2)	mmu-miR-181c-5p(1)//mmu-miR-181d-5p(1)				0.45	NA	NA	NA	NA	0	0.45
FAM179B	mmu-miR-181c-5p(1)//mmu-miR-181d-5p(1)	mmu-miR-181c(6)//mmu-miR-181d(8)	mmu-miR-181c-5p(1)//mmu-miR-181d-5p(1)				0.45	NA	NA	NA	NA	0	0.45
FAM98B		mmu-miR-181c(1)//mmu-miR-181d(1)			miR-181c-5p(1)	miR-181c-5p(1)//miR-181d-5p(1)	0.45	NA	NA	NA	NA	0	0.45
FBN1			mmu-miR-181c-5p(1)//mmu-miR-181d-5p(1)		miR-181d-5p(1)	miR-181c-5p(1)//miR-181d-5p(1)	0.45	NA	NA	NA	NA	0	0.45
FBXO30			mmu-miR-181c-5p(1)//mmu-miR-181d-5p(1)		miR-181c-5p(1)	miR-181c-5p(1)//miR-181d-5p(1)	0.45	NA	NA	NA	NA	0	0.45
FKBP4			mmu-miR-181c-5p(1)//mmu-miR-181d-5p(1)		miR-181c-5p(1)	miR-181c-5p(1)//miR-181d-5p(1)	0.45	NA	NA	NA	NA	0	0.45
FRMD6			mmu-miR-181c-5p(1)//mmu-miR-181d-5p(1)		miR-181c-5p(1)	miR-181c-5p(1)//miR-181d-5p(1)	0.45	NA	NA	NA	NA	0	0.45
GALK2	mmu-miR-181c-5p(1)//mmu-miR-181d-5p(1)	mmu-miR-181c(1)//mmu-miR-181d(2)	mmu-miR-181c-5p(1)//mmu-miR-181d-5p(1)				0.45	NA	NA	NA	NA	0	0.45
GJA1		mmu-miR-181c(1)//mmu-miR-181d(1)			miR-181c-5p(1)	miR-181c-5p(1)//miR-181d-5p(1)	0.45	NA	NA	NA	NA	0	0.45
GLT25D2		mmu-miR-181c(1)//mmu-miR-181d(1)	mmu-miR-181c-5p(1)//mmu-miR-181d-5p(1)	mmu-miR-181c(1)//mmu-miR-181d(1)			0.45	NA	NA	NA	NA	0	0.45
GM14288	mmu-miR-181c-5p(6)//mmu-miR-181d-5p(6)	mmu-miR-181c(42)//mmu-miR-181d(42)	mmu-miR-181c-5p(1)//mmu-miR-181d-5p(1)				0.45	NA	NA	NA	NA	0	0.45
GM5113	mmu-miR-181c-5p(1)//mmu-miR-181d-5p(1)	mmu-miR-181c(1)//mmu-miR-181d(1)	mmu-miR-181c-5p(1)//mmu-miR-181d-5p(1)				0.45	NA	NA	NA	NA	0	0.45
GM5595	mmu-miR-181c-5p(3)//mmu-miR-181d-5p(3)	mmu-miR-181c(4)//mmu-miR-181d(4)	mmu-miR-181c-5p(1)//mmu-miR-181d-5p(1)				0.45	NA	NA	NA	NA	0	0.45
GMCL1		mmu-miR-181c(2)//mmu-miR-181d(2)	mmu-miR-181c-5p(1)//mmu-miR-181d-5p(1)	mmu-miR-181c(1)//mmu-miR-181d(1)			0.45	NA	NA	NA	NA	0	0.45
GPR137B	mmu-miR-181c-5p(1)//mmu-miR-181d-5p(1)				miR-181c-5p(1)	miR-181c-5p(1)//miR-181d-5p(1)	0.45	NA	NA	NA	NA	0	0.45
H3F3A		mmu-miR-181c(1)//mmu-miR-181d(1)	mmu-miR-181c-5p(1)//mmu-miR-181d-5p(1)	mmu-miR-181c(1)//mmu-miR-181d(1)			0.45	NA	NA	NA	NA	0	0.45
HEG1			mmu-miR-181c-5p(1)//mmu-miR-181d-5p(1)		miR-181d-5p(1)	miR-181c-5p(1)//miR-181d-5p(1)	0.45	NA	NA	NA	NA	0	0.45
HGF	mmu-miR-181c-5p(1)//mmu-miR-181d-5p(1)	mmu-miR-181c(3)//mmu-miR-181d(3)	mmu-miR-181c-5p(1)//mmu-miR-181d-5p(1)				0.45	NA	NA	NA	NA	0	0.45
HNRNPH1			mmu-miR-181c-5p(1)//mmu-miR-181d-5p(1)		miR-181d-5p(1)	miR-181c-5p(1)//miR-181d-5p(1)	0.45	NA	NA	NA	NA	0	0.45
HOXB5		mmu-miR-181c(1)//mmu-miR-181d(1)	mmu-miR-181c-5p(1)//mmu-miR-181d-5p(1)	mmu-miR-181c(1)//mmu-miR-181d(1)			0.45	NA	NA	NA	NA	0	0.45
HSF5		mmu-miR-181c(2)//mmu-miR-181d(2)	mmu-miR-181c-5p(1)//mmu-miR-181d-5p(1)	mmu-miR-181c(1)//mmu-miR-181d(1)			0.45	NA	NA	NA	NA	0	0.45
HTR7		mmu-miR-181c(6)//mmu-miR-181d(2)	mmu-miR-181c-5p(1)//mmu-miR-181d-5p(1)	mmu-miR-181c(1)//mmu-miR-181d(1)			0.45	NA	NA	NA	NA	0	0.45
IL7	mmu-miR-181c-5p(1)//mmu-miR-181d-5p(1)	mmu-miR-181c(1)//mmu-miR-181d(1)	mmu-miR-181c-5p(1)//mmu-miR-181d-5p(1)				0.45	NA	NA	NA	NA	0	0.45
KBTBD7			mmu-miR-181c-5p(1)//mmu-miR-181d-5p(1)		miR-181c-5p(1)	miR-181c-5p(1)//miR-181d-5p(1)	0.45	NA	NA	NA	NA	0	0.45
KDM5A			mmu-miR-181c-5p(1)//mmu-miR-181d-5p(1)		miR-181c-5p(1)	miR-181c-5p(1)//miR-181d-5p(1)	0.45	NA	NA	NA	NA	0	0.45
LAPTM4B		mmu-miR-181c(1)//mmu-miR-181d(1)			miR-181c-5p(1)	miR-181c-5p(1)//miR-181d-5p(1)	0.45	NA	NA	NA	NA	0	0.45
LGALSL	mmu-miR-181c-5p(1)//mmu-miR-181d-5p(1)				miR-181c-5p(1)	miR-181c-5p(1)//miR-181d-5p(1)	0.45	NA	NA	NA	NA	0	0.45
MCMBP			mmu-miR-181c-5p(1)//mmu-miR-181d-5p(1)		miR-181c-5p(1)	miR-181c-5p(1)//miR-181d-5p(1)	0.45	NA	NA	NA	NA	0	0.45
MFNG	mmu-miR-181c-5p(1)//mmu-miR-181d-5p(1)	mmu-miR-181c(1)//mmu-miR-181d(1)	mmu-miR-181c-5p(1)//mmu-miR-181d-5p(1)				0.45	NA	NA	NA	NA	0	0.45
MLL1		mmu-miR-181c(3)//mmu-miR-181d(3)	mmu-miR-181c-5p(1)//mmu-miR-181d-5p(1)	mmu-miR-181c(3)//mmu-miR-181d(3)			0.45	NA	NA	NA	NA	0	0.45
MLL3		mmu-miR-181c(3)//mmu-miR-181d(3)	mmu-miR-181c-5p(1)//mmu-miR-181d-5p(1)	mmu-miR-181c(1)//mmu-miR-181d(1)			0.45	NA	NA	NA	NA	0	0.45
MSL2			mmu-miR-181c-5p(1)//mmu-miR-181d-5p(1)		miR-181c-5p(1)	miR-181c-5p(1)//miR-181d-5p(1)	0.45	NA	NA	NA	NA	0	0.45
MTAP1A		mmu-miR-181c(1)//mmu-miR-181d(1)	mmu-miR-181c-5p(1)//mmu-miR-181d-5p(1)	mmu-miR-181c(1)//mmu-miR-181d(1)			0.45	NA	NA	NA	NA	0	0.45
MTAP1B		mmu-miR-181c(2)//mmu-miR-181d(2)	mmu-miR-181c-5p(1)//mmu-miR-181d-5p(1)	mmu-miR-181c(2)//mmu-miR-181d(2)			0.45	NA	NA	NA	NA	0	0.45
MTX3			mmu-miR-181c-5p(1)//mmu-miR-181d-5p(1)		miR-181c-5p(1)	miR-181c-5p(1)//miR-181d-5p(1)	0.45	NA	NA	NA	NA	0	0.45
N4BP2L2			mmu-miR-181c-5p(1)//mmu-miR-181d-5p(1)		miR-181c-5p(1)	miR-181c-5p(1)//miR-181d-5p(1)	0.45	NA	NA	NA	NA	0	0.45
NCAPG		mmu-miR-181c(1)//mmu-miR-181d(1)			miR-181c-5p(1)	miR-181c-5p(1)//miR-181d-5p(1)	0.45	NA	NA	NA	NA	0	0.45
NHLRC2		mmu-miR-181c(1)//mmu-miR-181d(1)			miR-181d-5p(1)	miR-181c-5p(1)//miR-181d-5p(1)	0.45	NA	NA	NA	NA	0	0.45
NKAIN2	mmu-miR-181c-5p(1)//mmu-miR-181d-5p(1)	mmu-miR-181c(1)//mmu-miR-181d(1)		mmu-miR-181c(1)//mmu-miR-181d(1)			0.45	NA	NA	NA	NA	0	0.45
NMNAT1	mmu-miR-181c-5p(1)//mmu-miR-181d-5p(1)	mmu-miR-181c(1)//mmu-miR-181d(2)	mmu-miR-181c-5p(1)//mmu-miR-181d-5p(1)				0.45	NA	NA	NA	NA	0	0.45
NSD1			mmu-miR-181c-5p(1)//mmu-miR-181d-5p(1)		miR-181d-5p(1)	miR-181c-5p(1)//miR-181d-5p(1)	0.45	NA	NA	NA	NA	0	0.45
NSUN3	mmu-miR-181c-5p(1)//mmu-miR-181d-5p(1)	mmu-miR-181c(1)//mmu-miR-181d(1)	mmu-miR-181c-5p(1)//mmu-miR-181d-5p(1)				0.45	NA	NA	NA	NA	0	0.45
NUP155			mmu-miR-181c-5p(1)//mmu-miR-181d-5p(1)		miR-181c-5p(1)	miR-181c-5p(1)//miR-181d-5p(1)	0.45	NA	NA	NA	NA	0	0.45
OSBPL6	mmu-miR-181c-5p(1)//mmu-miR-181d-5p(1)	mmu-miR-181c(1)//mmu-miR-181d(1)	mmu-miR-181c-5p(1)//mmu-miR-181d-5p(1)				0.45	NA	NA	NA	NA	0	0.45
PAPPA			mmu-miR-181c-5p(1)//mmu-miR-181d-5p(1)		miR-181d-5p(1)	miR-181c-5p(1)//miR-181d-5p(1)	0.45	NA	NA	NA	NA	0	0.45
PCGF5			mmu-miR-181c-5p(1)//mmu-miR-181d-5p(1)		miR-181c-5p(1)	miR-181c-5p(1)//miR-181d-5p(1)	0.45	NA	NA	NA	NA	0	0.45
PDE7A			mmu-miR-181c-5p(1)//mmu-miR-181d-5p(1)		miR-181d-5p(1)	miR-181c-5p(1)//miR-181d-5p(1)	0.45	NA	NA	NA	NA	0	0.45
PDZRN3	mmu-miR-181c-5p(1)//mmu-miR-181d-5p(1)	mmu-miR-181c(1)//mmu-miR-181d(1)	mmu-miR-181c-5p(1)//mmu-miR-181d-5p(1)				0.45	NA	NA	NA	NA	0	0.45
PIK3C2A		mmu-miR-181c(2)//mmu-miR-181d(3)			miR-181d-5p(1)	miR-181c-5p(1)//miR-181d-5p(1)	0.45	NA	NA	NA	NA	0	0.45
PITX2	mmu-miR-181c-5p(1)//mmu-miR-181d-5p(1)	mmu-miR-181c(1)//mmu-miR-181d(1)	mmu-miR-181c-5p(1)//mmu-miR-181d-5p(1)				0.45	NA	NA	NA	NA	0	0.45
PLEKHB2		mmu-miR-181c(1)//mmu-miR-181d(1)			miR-181c-5p(1)	miR-181c-5p(1)//miR-181d-5p(1)	0.45	NA	NA	NA	NA	0	0.45
PLS3			mmu-miR-181c-5p(1)//mmu-miR-181d-5p(1)		miR-181c-5p(1)	miR-181c-5p(1)//miR-181d-5p(1)	0.45	NA	NA	NA	NA	0	0.45
PPIL4		mmu-miR-181c(2)//mmu-miR-181d(2)			miR-181c-5p(1)	miR-181c-5p(1)//miR-181d-5p(1)	0.45	NA	NA	NA	NA	0	0.45
PPP2R5C		mmu-miR-181c(3)//mmu-miR-181d(3)			miR-181c-5p(1)	miR-181c-5p(1)//miR-181d-5p(1)	0.45	NA	NA	NA	NA	0	0.45
PWWP2A		mmu-miR-181c(1)//mmu-miR-181d(1)			miR-181d-5p(1)	miR-181c-5p(1)//miR-181d-5p(1)	0.45	NA	NA	NA	NA	0	0.45
RAB31			mmu-miR-181c-5p(1)//mmu-miR-181d-5p(1)		miR-181d-5p(1)	miR-181c-5p(1)//miR-181d-5p(1)	0.45	NA	NA	NA	NA	0	0.45
RAD1			mmu-miR-181c-5p(1)//mmu-miR-181d-5p(1)		miR-181c-5p(1)	miR-181c-5p(1)//miR-181d-5p(1)	0.45	NA	NA	NA	NA	0	0.45
RAD54B	mmu-miR-181c-5p(1)//mmu-miR-181d-5p(1)	mmu-miR-181c(2)//mmu-miR-181d(2)	mmu-miR-181c-5p(1)//mmu-miR-181d-5p(1)				0.45	NA	NA	NA	NA	0	0.45
RBM39			mmu-miR-181c-5p(1)//mmu-miR-181d-5p(1)		miR-181c-5p(1)	miR-181c-5p(1)//miR-181d-5p(1)	0.45	NA	NA	NA	NA	0	0.45
RDH10			mmu-miR-181c-5p(1)//mmu-miR-181d-5p(1)		miR-181d-5p(1)	miR-181c-5p(1)//miR-181d-5p(1)	0.45	NA	NA	NA	NA	0	0.45
REST			mmu-miR-181c-5p(1)//mmu-miR-181d-5p(1)		miR-181c-5p(1)//miR-181d-5p(1)	miR-181c-5p(1)	0.45	NA	NA	NA	NA	0	0.45
RIF1			mmu-miR-181c-5p(1)//mmu-miR-181d-5p(1)		miR-181d-5p(1)	miR-181c-5p(1)//miR-181d-5p(1)	0.45	NA	NA	NA	NA	0	0.45
RNF217	mmu-miR-181c-5p(2)//mmu-miR-181d-5p(2)				miR-181c-5p(1)	miR-181c-5p(1)//miR-181d-5p(1)	0.45	NA	NA	NA	NA	0	0.45
RNF38			mmu-miR-181c-5p(1)//mmu-miR-181d-5p(1)		miR-181d-5p(1)	miR-181c-5p(1)//miR-181d-5p(1)	0.45	NA	NA	NA	NA	0	0.45
RNFT1		mmu-miR-181c(1)//mmu-miR-181d(1)			miR-181d-5p(1)	miR-181c-5p(1)//miR-181d-5p(1)	0.45	NA	NA	NA	NA	0	0.45
ROD1		mmu-miR-181c(1)//mmu-miR-181d(2)	mmu-miR-181c-5p(1)//mmu-miR-181d-5p(1)	mmu-miR-181c(1)//mmu-miR-181d(1)			0.45	NA	NA	NA	NA	0	0.45
S100PBP			mmu-miR-181c-5p(1)//mmu-miR-181d-5p(1)		miR-181c-5p(1)	miR-181c-5p(1)//miR-181d-5p(1)	0.45	NA	NA	NA	NA	0	0.45
SASS6			mmu-miR-181c-5p(1)//mmu-miR-181d-5p(1)		miR-181c-5p(1)	miR-181c-5p(1)//miR-181d-5p(1)	0.45	NA	NA	NA	NA	0	0.45
SCRN1			mmu-miR-181c-5p(1)//mmu-miR-181d-5p(1)		miR-181d-5p(1)	miR-181c-5p(1)//miR-181d-5p(1)	0.45	NA	NA	NA	NA	0	0.45
SF3B1			mmu-miR-181c-5p(1)//mmu-miR-181d-5p(1)		miR-181d-5p(1)	miR-181c-5p(1)//miR-181d-5p(1)	0.45	NA	NA	NA	NA	0	0.45
SLC16A12	mmu-miR-181c-5p(1)//mmu-miR-181d-5p(1)	mmu-miR-181c(1)//mmu-miR-181d(1)	mmu-miR-181c-5p(1)//mmu-miR-181d-5p(1)				0.45	NA	NA	NA	NA	0	0.45
SLC39A8	mmu-miR-181c-5p(1)//mmu-miR-181d-5p(1)	mmu-miR-181c(2)//mmu-miR-181d(2)	mmu-miR-181c-5p(1)//mmu-miR-181d-5p(1)				0.45	NA	NA	NA	NA	0	0.45
SLC7A2			mmu-miR-181c-5p(1)//mmu-miR-181d-5p(1)		miR-181c-5p(1)	miR-181c-5p(1)//miR-181d-5p(1)	0.45	NA	NA	NA	NA	0	0.45
SNX13			mmu-miR-181c-5p(1)//mmu-miR-181d-5p(1)		miR-181d-5p(1)	miR-181c-5p(1)//miR-181d-5p(1)	0.45	NA	NA	NA	NA	0	0.45
SNX4			mmu-miR-181c-5p(1)//mmu-miR-181d-5p(1)		miR-181c-5p(1)	miR-181c-5p(1)//miR-181d-5p(1)	0.45	NA	NA	NA	NA	0	0.45
SOSTDC1		mmu-miR-181c(1)//mmu-miR-181d(1)	mmu-miR-181c-5p(1)//mmu-miR-181d-5p(1)	mmu-miR-181c(1)//mmu-miR-181d(1)			0.45	NA	NA	NA	NA	0	0.45
SPATS2			mmu-miR-181c-5p(1)//mmu-miR-181d-5p(1)		miR-181d-5p(1)	miR-181c-5p(1)//miR-181d-5p(1)	0.45	NA	NA	NA	NA	0	0.45
SPRY2			mmu-miR-181c-5p(1)//mmu-miR-181d-5p(1)		miR-181c-5p(1)	miR-181c-5p(1)//miR-181d-5p(1)	0.45	NA	NA	NA	NA	0	0.45
SSR1			mmu-miR-181c-5p(1)//mmu-miR-181d-5p(1)		miR-181c-5p(1)	miR-181c-5p(1)//miR-181d-5p(1)	0.45	NA	NA	NA	NA	0	0.45
STK39		mmu-miR-181c(1)//mmu-miR-181d(1)			miR-181c-5p(1)	miR-181c-5p(1)//miR-181d-5p(1)	0.45	NA	NA	NA	NA	0	0.45
SYPL2		mmu-miR-181c(1)//mmu-miR-181d(1)	mmu-miR-181c-5p(1)//mmu-miR-181d-5p(1)	mmu-miR-181c(1)//mmu-miR-181d(1)			0.45	NA	NA	NA	NA	0	0.45
SYT3	mmu-miR-181c-5p(1)//mmu-miR-181d-5p(1)	mmu-miR-181c(1)//mmu-miR-181d(1)	mmu-miR-181c-5p(1)//mmu-miR-181d-5p(1)				0.45	NA	NA	NA	NA	0	0.45
TBC1D5		mmu-miR-181c(2)//mmu-miR-181d(5)			miR-181d-5p(1)	miR-181c-5p(1)//miR-181d-5p(1)	0.45	NA	NA	NA	NA	0	0.45
TIMD4	mmu-miR-181c-5p(1)//mmu-miR-181d-5p(1)	mmu-miR-181c(1)//mmu-miR-181d(1)	mmu-miR-181c-5p(1)//mmu-miR-181d-5p(1)				0.45	NA	NA	NA	NA	0	0.45
TMEM245			mmu-miR-181c-5p(1)//mmu-miR-181d-5p(1)		miR-181c-5p(1)	miR-181c-5p(1)//miR-181d-5p(1)	0.45	NA	NA	NA	NA	0	0.45
TNRC6A			mmu-miR-181c-5p(1)//mmu-miR-181d-5p(1)		miR-181d-5p(1)	miR-181c-5p(1)//miR-181d-5p(1)	0.45	NA	NA	NA	NA	0	0.45
TRAPPC10		mmu-miR-181c(1)//mmu-miR-181d(3)			miR-181d-5p(1)	miR-181c-5p(1)//miR-181d-5p(1)	0.45	NA	NA	NA	NA	0	0.45
TRIM52		mmu-miR-181c(2)//mmu-miR-181d(2)	mmu-miR-181c-5p(1)//mmu-miR-181d-5p(1)	mmu-miR-181c(1)//mmu-miR-181d(1)			0.45	NA	NA	NA	NA	0	0.45
TSGA14		mmu-miR-181c(2)//mmu-miR-181d(2)	mmu-miR-181c-5p(1)//mmu-miR-181d-5p(1)	mmu-miR-181c(1)//mmu-miR-181d(1)			0.45	NA	NA	NA	NA	0	0.45
UBA6		mmu-miR-181c(2)//mmu-miR-181d(3)			miR-181d-5p(1)	miR-181c-5p(1)//miR-181d-5p(1)	0.45	NA	NA	NA	NA	0	0.45
WDR20	mmu-miR-181c-5p(1)//mmu-miR-181d-5p(1)				miR-181c-5p(1)	miR-181c-5p(1)//miR-181d-5p(1)	0.45	NA	NA	NA	NA	0	0.45
WDR20A		mmu-miR-181c(1)//mmu-miR-181d(1)	mmu-miR-181c-5p(1)//mmu-miR-181d-5p(1)	mmu-miR-181c(1)//mmu-miR-181d(1)			0.45	NA	NA	NA	NA	0	0.45
WDR33			mmu-miR-181c-5p(1)//mmu-miR-181d-5p(1)		miR-181c-5p(1)	miR-181c-5p(1)//miR-181d-5p(1)	0.45	NA	NA	NA	NA	0	0.45
WSCD2	mmu-miR-181c-5p(1)//mmu-miR-181d-5p(1)	mmu-miR-181c(2)//mmu-miR-181d(2)	mmu-miR-181c-5p(1)//mmu-miR-181d-5p(1)				0.45	NA	NA	NA	NA	0	0.45
XK	mmu-miR-181c-5p(1)//mmu-miR-181d-5p(1)	mmu-miR-181c(1)//mmu-miR-181d(1)	mmu-miR-181c-5p(1)//mmu-miR-181d-5p(1)				0.45	NA	NA	NA	NA	0	0.45
ZFP286	mmu-miR-181c-5p(2)//mmu-miR-181d-5p(2)	mmu-miR-181c(1)//mmu-miR-181d(1)	mmu-miR-181c-5p(1)//mmu-miR-181d-5p(1)				0.45	NA	NA	NA	NA	0	0.45
ZFP622	mmu-miR-181c-5p(1)//mmu-miR-181d-5p(1)	mmu-miR-181c(2)//mmu-miR-181d(3)	mmu-miR-181c-5p(1)//mmu-miR-181d-5p(1)				0.45	NA	NA	NA	NA	0	0.45
ZFP654		mmu-miR-181c(1)//mmu-miR-181d(1)	mmu-miR-181c-5p(1)//mmu-miR-181d-5p(1)	mmu-miR-181c(1)//mmu-miR-181d(1)			0.45	NA	NA	NA	NA	0	0.45
ZFP825	mmu-miR-181c-5p(2)//mmu-miR-181d-5p(2)	mmu-miR-181c(1)//mmu-miR-181d(1)		mmu-miR-181c(1)//mmu-miR-181d(1)			0.45	NA	NA	NA	NA	0	0.45
ZFP867	mmu-miR-181c-5p(1)//mmu-miR-181d-5p(1)	mmu-miR-181c(1)//mmu-miR-181d(1)	mmu-miR-181c-5p(1)//mmu-miR-181d-5p(1)				0.45	NA	NA	NA	NA	0	0.45
ZFP872	mmu-miR-181c-5p(2)//mmu-miR-181d-5p(2)	mmu-miR-181c(2)//mmu-miR-181d(2)	mmu-miR-181c-5p(1)//mmu-miR-181d-5p(1)				0.45	NA	NA	NA	NA	0	0.45
ZZZ3	mmu-miR-181c-5p(1)//mmu-miR-181d-5p(1)		mmu-miR-181c-5p(1)//mmu-miR-181d-5p(1)	mmu-miR-181c(1)//mmu-miR-181d(1)			0.45	NA	NA	NA	NA	0	0.45
1810013L24RIK		mmu-miR-181d(1)	mmu-miR-181c-5p(1)//mmu-miR-181d-5p(1)		miR-181c-5p(1)//miR-181d-5p(1)		0.425	NA	NA	NA	NA	0	0.425
2410131K14RIK		mmu-miR-181c(1)	mmu-miR-181c-5p(1)//mmu-miR-181d-5p(1)			miR-181c-5p(1)//miR-181d-5p(1)	0.425	NA	NA	NA	NA	0	0.425
AI597479		mmu-miR-181d(1)	mmu-miR-181c-5p(1)//mmu-miR-181d-5p(1)			miR-181c-5p(1)//miR-181d-5p(1)	0.425	NA	NA	NA	NA	0	0.425
ANKIB1		mmu-miR-181c(1)//mmu-miR-181d(1)	mmu-miR-181c-5p(1)		miR-181c-5p(1)//miR-181d-5p(1)		0.425	NA	NA	NA	NA	0	0.425
ARHGEF9		mmu-miR-181d(1)	mmu-miR-181c-5p(1)//mmu-miR-181d-5p(1)			miR-181c-5p(1)//miR-181d-5p(1)	0.425	NA	NA	NA	NA	0	0.425
ARPC5L		mmu-miR-181c(1)//mmu-miR-181d(1)	mmu-miR-181d-5p(1)			miR-181c-5p(1)//miR-181d-5p(1)	0.425	NA	NA	NA	NA	0	0.425
ATM		mmu-miR-181d(1)	mmu-miR-181c-5p(1)//mmu-miR-181d-5p(1)			miR-181c-5p(1)//miR-181d-5p(1)	0.425	NA	NA	NA	NA	0	0.425
ATP1B2		mmu-miR-181d(1)	mmu-miR-181c-5p(1)//mmu-miR-181d-5p(1)			miR-181c-5p(1)//miR-181d-5p(1)	0.425	NA	NA	NA	NA	0	0.425
ATRX		mmu-miR-181d(1)	mmu-miR-181c-5p(1)//mmu-miR-181d-5p(1)			miR-181c-5p(1)//miR-181d-5p(1)	0.425	NA	NA	NA	NA	0	0.425
B4GALT4		mmu-miR-181c(3)//mmu-miR-181d(3)	mmu-miR-181d-5p(1)			miR-181c-5p(1)//miR-181d-5p(1)	0.425	NA	NA	NA	NA	0	0.425
B4GALT6		mmu-miR-181d(2)	mmu-miR-181c-5p(1)//mmu-miR-181d-5p(1)			miR-181c-5p(1)//miR-181d-5p(1)	0.425	NA	NA	NA	NA	0	0.425
CAPZA2		mmu-miR-181d(1)	mmu-miR-181c-5p(1)//mmu-miR-181d-5p(1)			miR-181c-5p(1)//miR-181d-5p(1)	0.425	NA	NA	NA	NA	0	0.425
CCDC126		mmu-miR-181c(1)//mmu-miR-181d(1)	mmu-miR-181c-5p(1)			miR-181c-5p(1)//miR-181d-5p(1)	0.425	NA	NA	NA	NA	0	0.425
CCDC137		mmu-miR-181d(1)	mmu-miR-181c-5p(1)//mmu-miR-181d-5p(1)			miR-181c-5p(1)//miR-181d-5p(1)	0.425	NA	NA	NA	NA	0	0.425
CCDC138		mmu-miR-181d(1)	mmu-miR-181c-5p(1)//mmu-miR-181d-5p(1)			miR-181c-5p(1)//miR-181d-5p(1)	0.425	NA	NA	NA	NA	0	0.425
CCDC43		mmu-miR-181c(2)//mmu-miR-181d(3)	mmu-miR-181d-5p(1)			miR-181c-5p(1)//miR-181d-5p(1)	0.425	NA	NA	NA	NA	0	0.425
CCDC85A	mmu-miR-181c-5p(1)//mmu-miR-181d-5p(1)	mmu-miR-181d(2)				miR-181c-5p(1)//miR-181d-5p(1)	0.425	NA	NA	NA	NA	0	0.425
CELF1		mmu-miR-181c(1)	mmu-miR-181c-5p(1)//mmu-miR-181d-5p(1)			miR-181c-5p(1)//miR-181d-5p(1)	0.425	NA	NA	NA	NA	0	0.425
[truncated: 2,414 more rows]

## Sheet: Hmgb3-experiment_diff-exp-genes
genes	log2FoldChange	pvalue	Direction
Gm13225	5.90714	3.82467e-05	Up-reg
Cyp3a11	5.45912	0.00137371	Up-reg
Krt77	4.7855	0.00849708	Up-reg
Nlrp9b	4.57527	0.00865441	Up-reg
A330033J07Rik	4.2676	0.0304105	Up-reg
Nlrp4c	4.19798	0.0286779	Up-reg
Lhfpl1	4.15977	0.0138436	Up-reg
Tdrd9	4.13387	0.000433036	Up-reg
Sst	4.0676	1.07441e-05	Up-reg
BC049352	4.04488	0.0341749	Up-reg
RP23-389M1.2	4.03233	0.0274783	Up-reg
Msln	3.8433	0.0417765	Up-reg
Gm6104	3.61619	0.000393765	Up-reg
Ptgds	3.60553	0.0016744	Up-reg
Gm11805	3.53219	0.0178856	Up-reg
Hmgb3	3.46287	2.88227e-05	Up-reg
Laptm5	3.13873	0.00852732	Up-reg
Ceacam20	3.08851	2.6158e-05	Up-reg
Hhex	2.99756	0.013489	Up-reg
Shroom1	2.80336	0.0344102	Up-reg
Uts2b	2.62871	0.00746193	Up-reg
Cyp4b1	2.50167	2.78267e-05	Up-reg
Nrn1	2.34022	8.45461e-05	Up-reg
Gm14412	2.12958	0.0113965	Up-reg
Eda2r	2.05152	0.00391372	Up-reg
Serpine2	1.9653	0.00659302	Up-reg
Fam151a	1.95082	0.0176673	Up-reg
Tmed6	1.7455	0.038197	Up-reg
Muc13	1.5795	0.0469028	Up-reg
Vcan	1.31283	0.0144171	Up-reg
Dmbt1	-2.86161	0.0243996	Down-reg
Slc47a2	-3.50717	0.00110237	Down-reg
1700121F15Rik	-3.64712	0.0432344	Down-reg
Lipg	-3.68863	0.0427659	Down-reg
Skor1	-3.85801	0.0334658	Down-reg
Zfp536	-4.0116	0.0203287	Down-reg
Gm16103	-4.01327	0.0185812	Down-reg
Slc38a1	-4.27857	0.00749912	Down-reg
