# Supplementary material for: Cancer Cells Retrace a Stepwise Differentiation Program during Malignant Progression
Source: Oxford University Press journal article supplement (doi:10.1158/2159-8290.cd-20-1637), 2021-04-28
Supplement: 21598290cd201637-sup-255232_2_supp_7038881_qr7zxv.docx [file 21598290cd201637-sup-255232_2_supp_7038881_qr7zxv.docx]

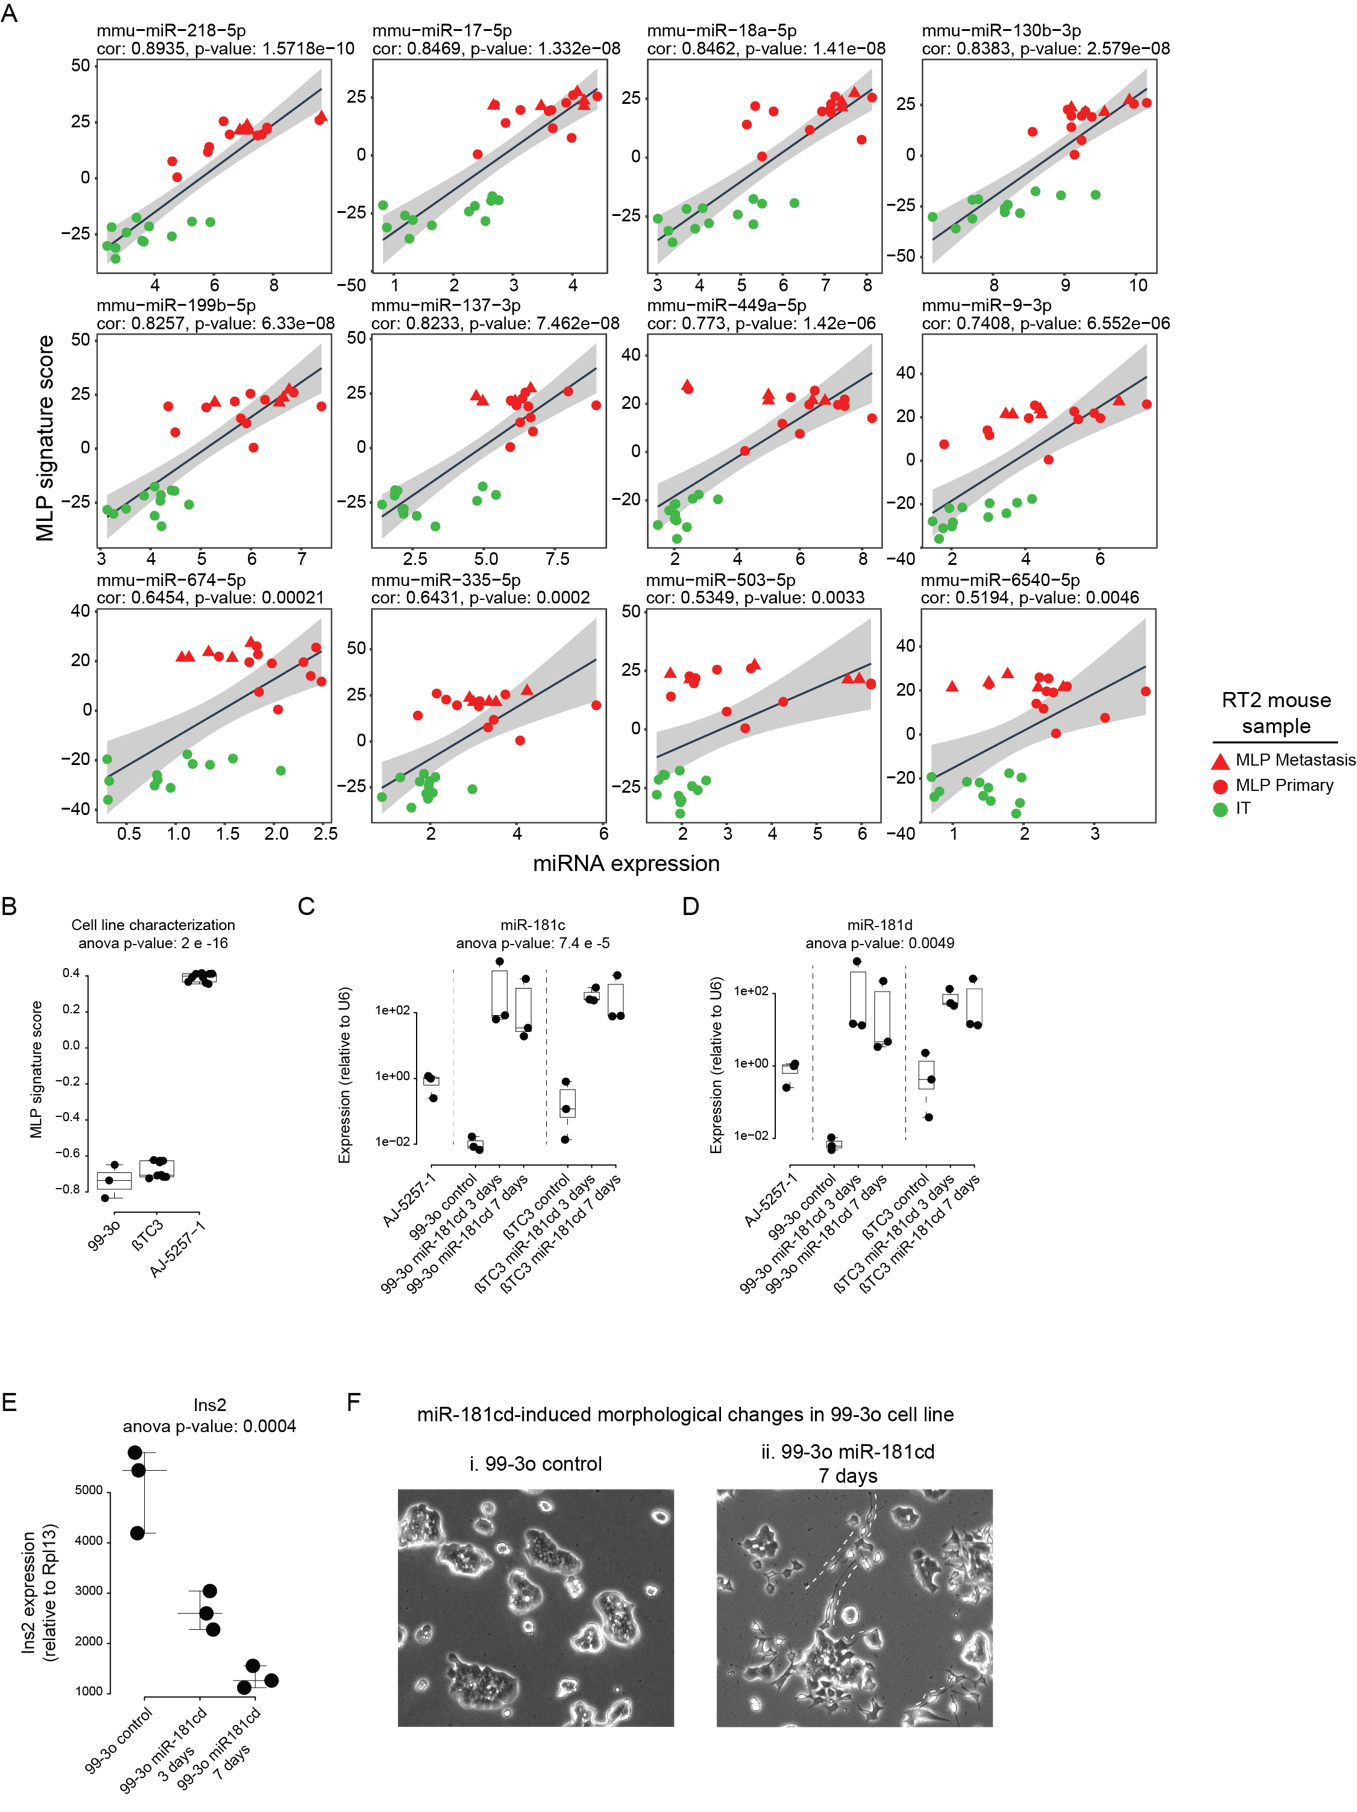


Supplementary Fig. S2

A. Scatter plots showing the correlation between expression of additional MLP-associated miRNAs (x-axis) and the MLP mRNA signature score (y-axis) in RT2 tumor samples.

B. MLP mRNA-signature score in the 99-3o and ßTC3 IT-like cell lines, and in the AJ-5257-1 MLP-like cell line.

C, D. Expression levels of miR-181c (C) and miR-181d (D) in 99-3o and βTC3 miR-181cd overexpressing cells, and the endogenous levels in AJ-5257-1 cells.

E. Insulin mRNA expression upon DOX-induced over-expression of miR-181cd in 99-3o cells.

F. Brightfield images of cancer cells: i. 99-3o control cells; ii. 99-3o cells 7 days post miR-181cd DOX-induced expression. The dashed lines illustrate miR-181cd-induced neuronal-like structures.
