# Supplementary material for: Cancer Cells Retrace a Stepwise Differentiation Program during Malignant Progression
Source: Oxford University Press journal article supplement (doi:10.1158/2159-8290.cd-20-1637), 2021-04-28
Supplement: 21598290cd201637-sup-255232_2_supp_7038885_qr7sxv.docx [file 21598290cd201637-sup-255232_2_supp_7038885_qr7sxv.docx]

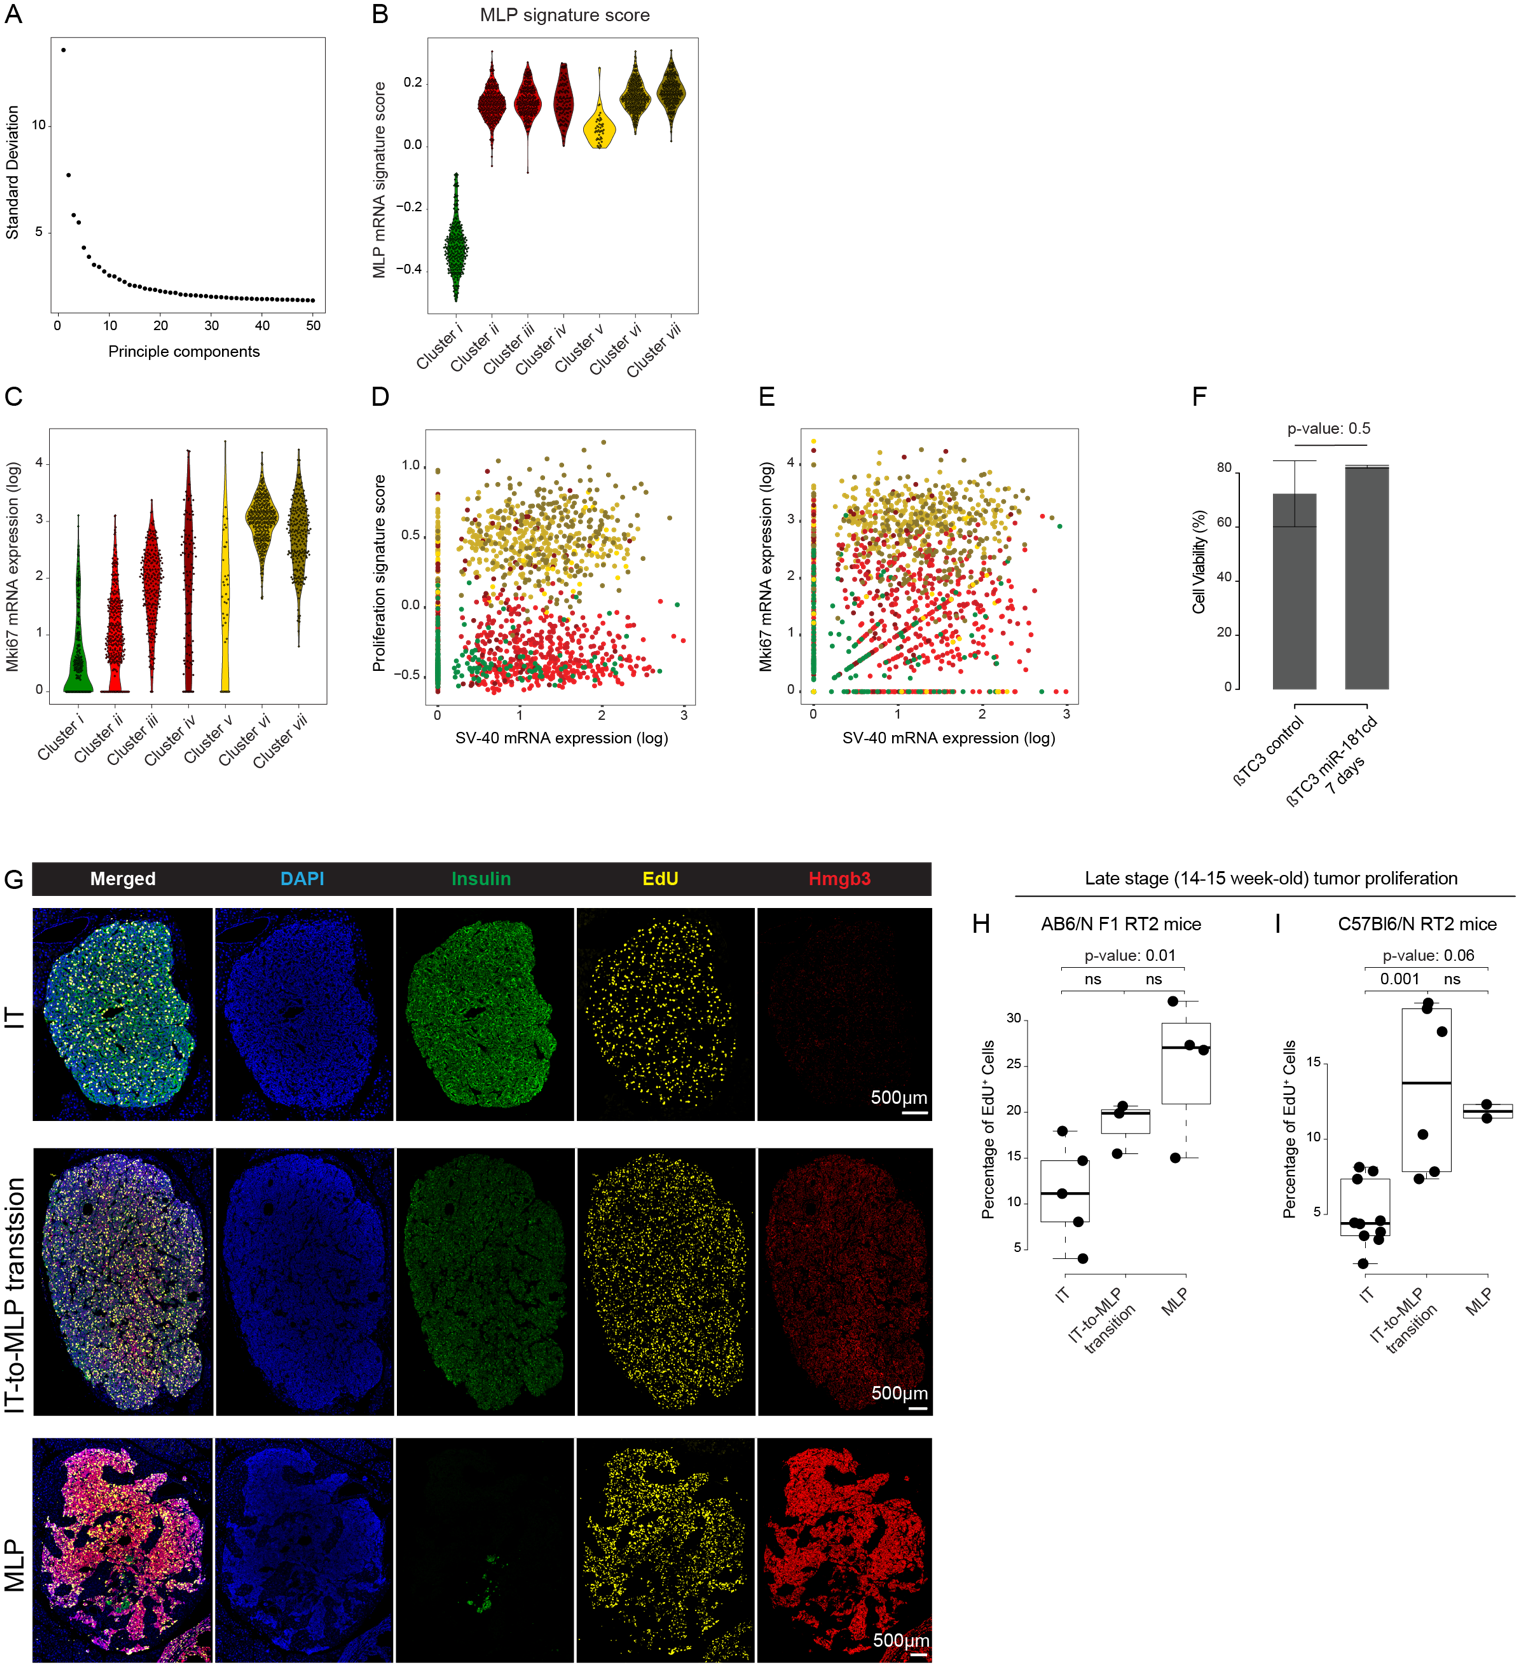


Supplementary Fig. S6

A. Variation (standard deviation) of top 50 principal components of PCA analysis of cancer cell single cell transcriptome.

B. Violin plot showing the MLP mRNA-signature score for each cancer cell sub-cluster.

C. Violin plot showing the Mki67 mRNA expression for each cancer cell sub-cluster shown in panel A, and Supplementary Fig. S2E.

D, E. Scatter-plots showing no correlation between cancer cell proliferation and SV-40 (D) or Mki67 (E) expression.

F. Cell viability for βTC3 cells before (control) and 7 days after DOX-induction of miR-181cd expression.

G. Representative images of Insulin, Hmgb3, and EdU immunostaining, IT, MLP, and proliferation markers, respectively, along with DAPI, of early lesions, from 7-8 weeks old RT2;AB/6J-F1 mice.

H, I. Quantification of EdU immunostaining to reveal proliferation of cancer cells in IT and MLP tumor lesions isolated from late stage tumors from RT2;AB/6J-F1 (H) and RT2;C57Bl6/N (I) mice.
